# Supplementary material for: Causal plasma metabolites for breast cancer risk: a two-sample Mendelian randomization study with colocalization evidence
Source: Research Square preprint supplement (doi:10.21203/rs.3.rs-6417186/v1), 2025-05-09
Supplement: Supplementary file 1 [file 4f57c38534c012be11fb8cb6.xlsx]

## Sheet: Sheet1
Table S1 The significant associations between plasma metabolites and BC risk (FinnGen)
outcome	exposure	method	nsnp	b	se	pval	lo_ci	up_ci	or	or_lci95	or_uci95	het_Qval	pleio_pval	direction	FDR	Bonferroni
FinnGen	1-arachidonoyl-GPE (20:4n6) levels	Inverse variance weighted	27	0.0582076	0.0159337	0.000259085	0.0269775	0.0894378	1.05994	1.02734	1.09356	0.68504	0.70344	TRUE	0.00526267	0.252608
FinnGen	1-linoleoyl-GPG (18:2) levels	Inverse variance weighted	19	0.0615716	0.0176061	0.000470212	0.0270636	0.0960795	1.06351	1.02743	1.10085	0.661904	0.779203	TRUE	0.00848994	0.458457
FinnGen	10-undecenoate (11:1n1) levels	Inverse variance weighted	9	-0.0890907	0.0308308	0.00385649	-0.149519	-0.0286624	0.914763	0.861122	0.971744	0.0582961	0.391839	TRUE	0.0407601	1
FinnGen	17alpha-hydroxypregnanolone glucuronide levels	Inverse variance weighted	14	0.0627608	0.0207197	0.00245336	0.0221501	0.103371	1.06477	1.0224	1.1089	0.715967	0.851424	TRUE	0.0296855	1
FinnGen	3,5-dichloro-2,6-dihydroxybenzoic acid levels	Inverse variance weighted	6	-0.108255	0.0387872	0.00525445	-0.184278	-0.0322324	0.897398	0.831704	0.968282	0.652162	0.363532	TRUE	0.046454	1
FinnGen	5-methylthioadenosine (MTA) to phosphate ratio	Inverse variance weighted	6	-0.14661	0.0484367	0.0024713	-0.241546	-0.0516739	0.863631	0.785413	0.949638	0.859683	0.717206	TRUE	0.0296855	1
FinnGen	5alpha-androstan-3alpha,17alpha-diol monosulfate levels	Inverse variance weighted	21	0.0818746	0.0125007	5.77007e-11	0.0573731	0.106376	1.08532	1.05905	1.11224	0.645095	0.168515	TRUE	5.62582e-09	5.62582e-08
FinnGen	5alpha-androstan-3alpha,17beta-diol monosulfate (1) levels	Inverse variance weighted	33	0.0508303	0.00798633	1.95714e-10	0.0351771	0.0664835	1.05214	1.0358	1.06874	0.881626	0.877688	TRUE	1.59018e-08	1.90821e-07
FinnGen	5alpha-androstan-3beta,17beta-diol disulfate levels	Inverse variance weighted	23	0.0854579	0.0178929	1.78754e-06	0.0503877	0.120528	1.08922	1.05168	1.12809	0.192012	0.0554013	TRUE	6.94162e-05	0.00174285
FinnGen	5alpha-androstan-3beta,17beta-diol monosulfate (2) levels	Inverse variance weighted	20	0.0627881	0.0111553	1.81725e-08	0.0409238	0.0846525	1.0648	1.04177	1.08834	0.306695	0.875708	TRUE	9.27097e-07	1.77182e-05
FinnGen	Adenosine 3',5'-cyclic monophosphate (camp) levels	Inverse variance weighted	7	0.209506	0.0433413	1.33907e-06	0.124557	0.294455	1.23307	1.13265	1.34239	0.786649	0.534145	TRUE	5.43999e-05	0.0013056
FinnGen	Adenosine 5'-monophosphate (AMP) to glycine ratio	Inverse variance weighted	6	-0.0909872	0.0275851	0.000972322	-0.145054	-0.0369203	0.913029	0.864976	0.963753	0.76537	0.260929	TRUE	0.0148127	0.948014
FinnGen	Alpha-ketoglutaramate levels	Inverse variance weighted	4	-0.133137	0.0447596	0.0029347	-0.220866	-0.0454085	0.875345	0.801824	0.955607	0.283794	0.657721	TRUE	0.0336628	1
FinnGen	Alpha-ketoglutarate to proline ratio	Inverse variance weighted	10	0.119144	0.0357495	0.000859951	0.0490748	0.189213	1.12653	1.0503	1.2083	0.635297	0.621664	TRUE	0.0137451	0.838452
FinnGen	Andro steroid monosulfate C19H28O6S (1) levels	Inverse variance weighted	37	-0.0828823	0.012157	9.25182e-12	-0.10671	-0.0590547	0.920459	0.898786	0.942655	0.25675	0.330646	TRUE	1.00228e-09	9.02052e-09
FinnGen	Androstenediol (3beta,17beta) monosulfate (1) levels	Inverse variance weighted	6	0.20331	0.0334415	1.20505e-09	0.137764	0.268855	1.22545	1.14771	1.30847	0.907238	0.462335	TRUE	7.83283e-08	1.17492e-06
FinnGen	Androsterone sulfate levels	Inverse variance weighted	38	0.0462246	0.00668954	4.84733e-12	0.0331131	0.0593361	1.04731	1.03367	1.06113	0.851792	0.0906492	TRUE	6.25716e-10	4.72614e-09
FinnGen	Behenoylcarnitine (C22) levels	Inverse variance weighted	7	-0.12316	0.0414957	0.00299735	-0.204491	-0.0418281	0.884122	0.815062	0.959035	0.199784	0.547277	TRUE	0.0338818	1
FinnGen	Beta-citrylglutamate levels	Inverse variance weighted	51	0.0783101	0.0113463	5.13408e-12	0.0560714	0.100549	1.08146	1.05767	1.10578	0.552886	0.0963231	TRUE	6.25716e-10	5.00573e-09
FinnGen	Branched-chain, straight-chain, or cyclopropyl 12:1 fatty acid levels	Inverse variance weighted	6	-0.175648	0.0510872	0.000585585	-0.275779	-0.0755173	0.838913	0.758981	0.927264	0.941638	0.763855	TRUE	0.0102805	0.570945
FinnGen	Carnitine C14 levels	Inverse variance weighted	3	-0.439727	0.0637103	5.12861e-12	-0.564599	-0.314854	0.644212	0.568588	0.729895	0.926737	0.809049	TRUE	6.25716e-10	5.0004e-09
FinnGen	Ceramide (d18:1_14:0, d16:1_16:0) levels	Inverse variance weighted	6	0.107203	0.0381081	0.0049061	0.0325114	0.181895	1.11316	1.03305	1.19949	0.849958	0.7093	TRUE	0.046454	1
FinnGen	Cys-gly, oxidized levels	Inverse variance weighted	44	0.0337893	0.0116645	0.00377045	0.0109268	0.0566518	1.03437	1.01099	1.05829	0.22374	0.737563	TRUE	0.0403976	1
FinnGen	Decadienedioic acid (C10:2-DC) levels	Inverse variance weighted	87	-0.0238007	0.00743485	0.0013684	-0.038373	-0.0092284	0.97648	0.962354	0.990814	0.892856	0.708255	TRUE	0.0196204	1
FinnGen	DHEAS levels	Inverse variance weighted	9	0.179588	0.0287456	4.17049e-10	0.123247	0.23593	1.19672	1.13116	1.26609	0.784488	0.931871	TRUE	3.12787e-08	4.06623e-07
FinnGen	Eicosanedioate (C20-DC) levels	Inverse variance weighted	3	0.185558	0.0597346	0.00189398	0.0684781	0.302638	1.20389	1.07088	1.35342	0.874074	0.74359	TRUE	0.0252963	1
FinnGen	Eicosenedioate (C20:1-DC) levels	Inverse variance weighted	18	0.06717	0.0205845	0.00110186	0.0268244	0.107516	1.06948	1.02719	1.11351	0.966224	0.91988	TRUE	0.016528	1
FinnGen	Epiandrosterone sulfate levels	Inverse variance weighted	31	0.054359	0.00778275	2.85792e-12	0.0391048	0.0696132	1.05586	1.03988	1.07209	0.995381	0.391953	TRUE	5.57294e-10	2.78647e-09
FinnGen	Erythritol levels in elite athletes	Inverse variance weighted	9	-0.142501	0.0230993	6.8708e-10	-0.187775	-0.0972259	0.867187	0.828801	0.907351	0.349877	0.177409	TRUE	4.78502e-08	6.69903e-07
FinnGen	Etiocholanolone glucuronide levels	Inverse variance weighted	38	0.0677645	0.0170642	7.15274e-05	0.0343187	0.10121	1.07011	1.03491	1.10651	0.0513758	0.266555	TRUE	0.00162184	0.0697392
FinnGen	Ferulic acid 4-sulfate levels	Inverse variance weighted	7	0.0729741	0.0241117	0.00247398	0.0257153	0.120233	1.0757	1.02605	1.12776	0.93541	0.697855	TRUE	0.0296855	1
FinnGen	Gamma-CEHC levels	Inverse variance weighted	9	0.081918	0.0282162	0.00369345	0.0266142	0.137222	1.08537	1.02697	1.14708	0.868025	0.243829	TRUE	0.0403976	1
FinnGen	Glucuronate to etiocholanolone glucuronide ratio	Inverse variance weighted	25	-0.0766752	0.0227723	0.000759818	-0.121309	-0.0320414	0.926191	0.88576	0.968466	0.0988864	0.452488	TRUE	0.012347	0.740822
FinnGen	Glycine to alanine ratio	Inverse variance weighted	20	0.0502224	0.0157418	0.00142082	0.0193685	0.0810764	1.0515	1.01956	1.08445	0.968902	0.757664	TRUE	0.0200768	1
FinnGen	Glycine to pyridoxal ratio	Inverse variance weighted	9	0.0821758	0.0247384	0.000894434	0.0336884	0.130663	1.08565	1.03426	1.13958	0.884528	0.348562	TRUE	0.0140657	0.872073
FinnGen	Glyco-beta-muricholate levels	Inverse variance weighted	18	-0.0741557	0.0122451	1.39593e-09	-0.098156	-0.0501553	0.928527	0.906507	0.951082	0.843787	0.0935532	TRUE	8.50644e-08	1.36103e-06
FinnGen	Glycocholenate sulfate levels	Inverse variance weighted	58	0.040689	0.0100564	5.20813e-05	0.0209785	0.0603995	1.04153	1.0212	1.06226	0.519545	0.795698	TRUE	0.00126948	0.0507793
FinnGen	Hexadecanedioate (C16-DC) levels	Inverse variance weighted	34	0.0629063	0.0131906	1.8511e-06	0.0370528	0.0887598	1.06493	1.03775	1.09282	0.701039	0.512815	TRUE	6.94162e-05	0.00180482
FinnGen	Hexadecenedioate (C16:1-DC) levels	Inverse variance weighted	39	0.0469516	0.0103328	5.52089e-06	0.0266994	0.0672038	1.04807	1.02706	1.06951	0.529779	0.939364	TRUE	0.000179429	0.00538287
FinnGen	Homoarginine levels	Inverse variance weighted	24	-0.0651386	0.0162922	6.38421e-05	-0.0970714	-0.0332058	0.936938	0.907491	0.967339	0.434866	0.351656	TRUE	0.0015182	0.0622461
FinnGen	Homostachydrine levels	Inverse variance weighted	8	-0.287308	0.0402676	9.68174e-13	-0.366232	-0.208383	0.750281	0.693342	0.811896	0.903929	0.520901	TRUE	3.14657e-10	9.4397e-10
FinnGen	Indoleacetoylcarnitine levels	Inverse variance weighted	25	0.0507207	0.0161857	0.00172632	0.0189968	0.0824447	1.05203	1.01918	1.08594	0.944151	0.104034	TRUE	0.0237065	1
FinnGen	Indoleacetylglutamine levels	Inverse variance weighted	15	0.0839229	0.0226629	0.000212986	0.0395036	0.128342	1.08755	1.04029	1.13694	0.718087	0.177857	TRUE	0.00451438	0.207662
FinnGen	Indolepropionate levels	Inverse variance weighted	8	-0.0997923	0.0327605	0.00231818	-0.164003	-0.0355817	0.905025	0.84874	0.965044	0.825292	0.30532	TRUE	0.0289772	1
FinnGen	N-acetylglycine levels	Inverse variance weighted	17	0.0573629	0.0202705	0.00465673	0.0176327	0.0970931	1.05904	1.01779	1.10196	0.34562	0.796028	TRUE	0.0463297	1
FinnGen	N,N-dimethylalanine levels	Inverse variance weighted	10	-0.195865	0.0429402	5.08287e-06	-0.280028	-0.111702	0.822123	0.755763	0.894311	0.336642	0.118404	TRUE	0.00017089	0.0049558
FinnGen	N,N,N-trimethyl-5-aminovalerate levels	Inverse variance weighted	25	-0.0779637	0.0271681	0.00410882	-0.131213	-0.0247143	0.924998	0.877031	0.975589	0.100251	0.100389	TRUE	0.0426181	1
FinnGen	N4-acetylcytidine levels	Inverse variance weighted	16	-0.0803615	0.0243222	0.000953027	-0.128033	-0.03269	0.922783	0.879824	0.967839	0.700227	0.983857	TRUE	0.0147492	0.929201
FinnGen	Octadecadienedioate (C18:2-DC) levels	Inverse variance weighted	41	0.0484005	0.0112527	1.69844e-05	0.0263452	0.0704558	1.04959	1.0267	1.073	0.431791	0.640984	TRUE	0.000459995	0.0165598
FinnGen	Octadecanedioate levels	Inverse variance weighted	10	0.0948002	0.0313519	0.00249663	0.0333506	0.15625	1.09944	1.03391	1.16912	0.480603	0.44889	TRUE	0.0296855	1
FinnGen	Octadecanedioylcarnitine (C18-DC) levels	Inverse variance weighted	45	0.0482984	0.0119157	5.04878e-05	0.0249437	0.0716531	1.04948	1.02526	1.07428	0.807613	0.5126	TRUE	0.00126219	0.0492256
FinnGen	Octadecenedioate (C18:1-DC) levels	Inverse variance weighted	31	0.0634257	0.0142239	8.23031e-06	0.0355469	0.0913045	1.06548	1.03619	1.0956	0.540393	0.509556	TRUE	0.000250767	0.00802456
FinnGen	Octadecenedioylcarnitine (C18:1-DC) levels	Inverse variance weighted	34	0.057331	0.0120603	1.99716e-06	0.0336929	0.0809691	1.05901	1.03427	1.08434	0.807405	0.355291	TRUE	7.21197e-05	0.00194723
FinnGen	Pregnanediol-3-glucuronide levels	Inverse variance weighted	13	0.0896648	0.0319632	0.00502779	0.0270169	0.152313	1.09381	1.02739	1.16452	0.115692	0.191829	TRUE	0.046454	1
FinnGen	Quinolinate levels	Inverse variance weighted	10	-0.176575	0.0409734	1.63618e-05	-0.256883	-0.0962673	0.838136	0.773459	0.908221	0.232149	0.546038	TRUE	0.000455792	0.0159527
FinnGen	Ribitol levels	Inverse variance weighted	14	-0.0950075	0.0112817	3.72047e-17	-0.11712	-0.0728954	0.909366	0.889479	0.929698	0.724556	0.197094	TRUE	3.62746e-14	3.62746e-14
FinnGen	S-adenosylhomocysteine (SAH) levels	Inverse variance weighted	4	0.130587	0.036469	0.000342595	0.0591076	0.202066	1.1395	1.06089	1.22393	0.998751	0.959947	TRUE	0.00642366	0.334031
FinnGen	S-adenosylhomocysteine (SAH) to leucine ratio	Inverse variance weighted	5	0.117967	0.034333	0.000590471	0.050674	0.185259	1.12521	1.05198	1.20353	0.840185	0.340504	TRUE	0.0102805	0.575709
FinnGen	Sphingomyelin (d18:1_14:0, d16:1_16:0) levels	Inverse variance weighted	19	0.0708908	0.0237291	0.00281272	0.0243816	0.1174	1.07346	1.02468	1.12457	0.0994581	0.907167	TRUE	0.0326476	1
FinnGen	Sphingomyelin (d18:1_17:0, d17:1_18:0, d19:1_16:0) levels	Inverse variance weighted	7	0.134563	0.0474518	0.00457146	0.0415571	0.227568	1.14404	1.04243	1.25554	0.878375	0.540373	TRUE	0.0459503	1
FinnGen	Sphingomyelin (d18:1_20:0, d16:1_22:0) levels	Inverse variance weighted	18	0.0619668	0.0218148	0.00450298	0.0192099	0.104724	1.06393	1.0194	1.1104	0.707232	0.693841	TRUE	0.0459503	1
FinnGen	Sphingomyelin (d18:1_21:0, d17:1_22:0, d16:1_23:0) levels	Inverse variance weighted	12	0.0807493	0.0274617	0.00327749	0.0269244	0.134574	1.0841	1.02729	1.14405	0.88828	0.686049	TRUE	0.0363131	1
FinnGen	Sphingomyelin (d18:1_22:1, d18:2_22:0, d16:1_24:1) levels	Inverse variance weighted	8	0.138583	0.0409998	0.000724641	0.0582231	0.218942	1.14864	1.05995	1.24476	0.881227	0.898735	TRUE	0.011975	0.706525
FinnGen	Sphingomyelin (d18:2_23:0, d18:1_23:1, d17:1_24:1) levels	Inverse variance weighted	4	0.231241	0.0719784	0.00131522	0.0901629	0.372318	1.26016	1.09435	1.45109	0.996988	0.995365	TRUE	0.0194294	1
FinnGen	Succinylcarnitine levels	Inverse variance weighted	19	0.11468	0.0162553	1.72659e-12	0.0828199	0.146541	1.12151	1.08635	1.15782	0.636548	0.979718	TRUE	4.20856e-10	1.68342e-09
FinnGen	Tetradecanedioate (C14-DC) levels	Inverse variance weighted	33	0.0596153	0.0134952	9.98472e-06	0.0331646	0.0860659	1.06143	1.03372	1.08988	0.725855	0.626841	TRUE	0.000286326	0.0097351
FinnGen	X-12798 levels	Inverse variance weighted	51	-0.0380361	0.0108337	0.000446602	-0.0592702	-0.016802	0.962678	0.942452	0.983338	0.19609	0.588019	TRUE	0.0082158	0.435437
FinnGen	X-12822 levels	Inverse variance weighted	17	0.0814561	0.0197832	3.83096e-05	0.0426811	0.120231	1.08487	1.04361	1.12776	0.997116	0.909326	TRUE	0.000982943	0.0373518
FinnGen	X-16087 levels	Inverse variance weighted	21	-0.0598036	0.0212541	0.00489679	-0.101462	-0.0181456	0.941949	0.903516	0.982018	0.781016	0.688501	TRUE	0.046454	1
FinnGen	X-21467 levels	Inverse variance weighted	45	0.0533434	0.0143106	0.000193352	0.0252946	0.0813921	1.05479	1.02562	1.0848	0.259632	0.29242	TRUE	0.0041893	0.188518
FinnGen	X-23644 levels	Inverse variance weighted	3	-0.278694	0.0630593	9.89005e-06	-0.402291	-0.155098	0.756771	0.668786	0.856331	0.749033	0.594996	TRUE	0.000286326	0.0096428
FinnGen	X-23780 levels	Inverse variance weighted	11	-0.234884	0.0285854	2.08814e-16	-0.290911	-0.178856	0.790663	0.747582	0.836226	0.565287	0.993594	TRUE	1.01797e-13	2.03593e-13
FinnGen	X-24418 levels	Inverse variance weighted	25	0.0557097	0.0155571	0.000342297	0.0252179	0.0862016	1.05729	1.02554	1.09003	0.909164	0.877358	TRUE	0.00642366	0.333739
FinnGen	X-24518 levels	Inverse variance weighted	25	-0.041554	0.0131657	0.00159826	-0.0673588	-0.0157492	0.959298	0.93486	0.984374	0.358719	0.754454	TRUE	0.0222614	1
FinnGen	X-24544 levels	Inverse variance weighted	39	-0.0355833	0.0127589	0.00528861	-0.0605906	-0.0105759	0.965042	0.941208	0.98948	0.494455	0.131088	TRUE	0.046454	1
FinnGen	X-24546 levels	Inverse variance weighted	25	0.0656387	0.0178524	0.000236234	0.030648	0.100629	1.06784	1.03112	1.10587	0.882899	0.629432	TRUE	0.00490059	0.230328
FinnGen	X-24947 levels	Inverse variance weighted	67	0.0597135	0.0100272	2.59828e-09	0.0400602	0.0793668	1.06153	1.04087	1.0826	0.0944872	0.425886	TRUE	1.49019e-07	2.53333e-06
FinnGen	3-hydroxyoctanoylcarnitine (1) levels	Wald ratio	rs6944935	-0.349649	0.125082	0.00518437	-0.59481	-0.104487	0.704936	0.551667	0.900786	NA	NA	TRUE	0.046454	1
FinnGen	3-hydroxyoctanoylcarnitine (2) levels	Wald ratio	rs6944935	-0.330735	0.118316	0.00518437	-0.562634	-0.0988351	0.718396	0.569707	0.905892	NA	NA	TRUE	0.046454	1
FinnGen	Phenylalanine to phosphate ratio	Wald ratio	rs10860932	-0.344237	0.11409	0.00255085	-0.567853	-0.120621	0.708761	0.566741	0.88637	NA	NA	TRUE	0.0299648	1
FinnGen	Sulfate levels	Wald ratio	rs1343904	-0.369655	0.130816	0.00471692	-0.626055	-0.113255	0.690973	0.534697	0.892923	NA	NA	TRUE	0.046454	1

## Sheet: Sheet2
Table S2 The significant associations between plasma metabolites and BC risk (BCAC OncoArray)
outcome	exposure	method	nsnp	b	se	pval	lo_ci	up_ci	or	or_lci95	or_uci95	het_Qval	pleio_pval	direction	FDR	Bonferroni
BCAC_OncoArray	(2 or 3)-decenoate (10:1n7 or n8) levels	Inverse variance weighted	5	-0.0353135	0.0324448	0.27641	-0.0989053	0.0282782	0.965303	0.905829	1.02868	NA	NA	NA	0.538379	1
BCAC_OncoArray	(N(1) + N(8))-acetylspermidine levels	Inverse variance weighted	24	0.0416807	0.0181526	0.0216686	0.00610157	0.0772597	1.04256	1.00612	1.08032	0.00767769	0.164454	TRUE	0.115769	1
BCAC_OncoArray	(R)-3-hydroxybutyrylcarnitine levels	Inverse variance weighted	2	-0.0749638	0.132345	0.571104	-0.33436	0.184432	0.927777	0.715796	1.20254	NA	NA	NA	0.791719	1
BCAC_OncoArray	(S)-3-hydroxybutyrylcarnitine levels	Inverse variance weighted	6	0.0511413	0.0266293	0.0547963	-0.00105218	0.103335	1.05247	0.998948	1.10886	NA	NA	NA	0.20356	1
BCAC_OncoArray	(S)-a-amino-omega-caprolactam levels	Inverse variance weighted	3	-0.125232	0.0671943	0.0623608	-0.256932	0.00646936	0.882293	0.773421	1.00649	NA	NA	NA	0.226405	1
BCAC_OncoArray	1-(1-enyl-palmitoyl)-2-arachidonoyl-gpc (p-16:0_20:4) levels	Inverse variance weighted	25	-0.0132259	0.0150612	0.379868	-0.0427458	0.0162941	0.986861	0.958155	1.01643	NA	NA	NA	0.620711	1
BCAC_OncoArray	1-(1-enyl-palmitoyl)-2-arachidonoyl-GPE (p-16:0_20:4) levels	Wald ratio	rs3826884	-0.0887541	0.0532407	0.0955078	-0.193106	0.0155978	0.915071	0.824395	1.01572	NA	NA	NA	0.294896	1
BCAC_OncoArray	1-(1-enyl-palmitoyl)-2-linoleoyl-GPC (p-16:0_18:2) levels	Inverse variance weighted	3	0.123438	0.0499564	0.0134765	0.0255239	0.221353	1.13138	1.02585	1.24776	0.754827	0.599672	TRUE	0.0871845	1
BCAC_OncoArray	1-(1-enyl-palmitoyl)-2-linoleoyl-GPE (p-16:0_18:2) levels	Inverse variance weighted	3	-0.0676957	0.0342002	0.0477714	-0.134728	-0.000663348	0.934545	0.873954	0.999337	0.783873	0.967948	TRUE	0.183653	1
BCAC_OncoArray	1-(1-enyl-palmitoyl)-2-oleoyl-gpc (p-16:0_18:1) levels	Inverse variance weighted	4	0.08551	0.0409266	0.0366761	0.0052939	0.165726	1.08927	1.00531	1.18025	0.575771	0.981791	TRUE	0.156804	1
BCAC_OncoArray	1-(1-enyl-palmitoyl)-2-oleoyl-GPE (p-16:0_18:1) levels	Wald ratio	rs3826886	-0.0980254	0.072025	0.173516	-0.239194	0.0431435	0.906626	0.787262	1.04409	NA	NA	NA	0.42049	1
BCAC_OncoArray	1-(1-enyl-palmitoyl)-2-palmitoleoyl-GPC (P-16:0_16:1) levels	Inverse variance weighted	17	0.00951652	0.0250797	0.704353	-0.0396397	0.0586727	1.00956	0.961136	1.06043	NA	NA	NA	0.878874	1
BCAC_OncoArray	1-(1-enyl-palmitoyl)-2-palmitoyl-GPC (P-16:0_16:0) levels	Inverse variance weighted	20	-0.0054765	0.0222929	0.805945	-0.0491706	0.0382176	0.994538	0.952019	1.03896	NA	NA	NA	0.919379	1
BCAC_OncoArray	1-(1-enyl-palmitoyl)-GPC (p-16:0) levels	Inverse variance weighted	4	0.102366	0.0467805	0.0286542	0.0106758	0.194055	1.10779	1.01073	1.21416	0.112483	0.917906	TRUE	0.139346	1
BCAC_OncoArray	1-(1-enyl-palmitoyl)-GPE (p-16:0) levels	Inverse variance weighted	3	0.0243113	0.133345	0.855332	-0.237044	0.285667	1.02461	0.788956	1.33065	NA	NA	NA	0.93752	1
BCAC_OncoArray	1-(1-enyl-stearoyl)-2-arachidonoyl-GPE (p-18:0_20:4) levels	Inverse variance weighted	11	-0.0269385	0.0241058	0.263776	-0.0741859	0.0203089	0.973421	0.928499	1.02052	NA	NA	NA	0.5356	1
BCAC_OncoArray	1-(1-enyl-stearoyl)-2-linoleoyl-GPE (p-18:0_18:2) levels	Inverse variance weighted	4	-0.052852	0.0430002	0.21903	-0.137132	0.0314284	0.94852	0.871855	1.03193	NA	NA	NA	0.487817	1
BCAC_OncoArray	1-(1-enyl-stearoyl)-2-oleoyl-GPE (p-18:0_18:1) levels	Wald ratio	rs141622900	0.0133358	0.0725857	0.854229	-0.128932	0.155604	1.01343	0.879034	1.16836	NA	NA	NA	0.93752	1
BCAC_OncoArray	1-(1-enyl-stearoyl)-GPE (p-18:0) levels	Inverse variance weighted	3	0.164491	0.0473031	0.000506342	0.0717767	0.257205	1.17879	1.07442	1.29331	0.288762	0.958899	TRUE	0.0072046	0.481532
BCAC_OncoArray	1-arachidonoyl-gpc (20:4n6) levels	Inverse variance weighted	25	-0.0085575	0.0136668	0.531216	-0.0353445	0.0182295	0.991479	0.965273	1.0184	NA	NA	NA	0.768926	1
BCAC_OncoArray	1-arachidonoyl-GPE (20:4n6) levels	Inverse variance weighted	16	0.00756886	0.0147247	0.607235	-0.0212916	0.0364293	1.0076	0.978933	1.0371	NA	NA	NA	0.817334	1
BCAC_OncoArray	1-arachidonylglycerol (20:4) levels	Inverse variance weighted	9	0.00592006	0.024575	0.809634	-0.0422469	0.054087	1.00594	0.958633	1.05558	NA	NA	NA	0.919379	1
BCAC_OncoArray	1-dihomo-linolenylglycerol (20:3) levels	Wald ratio	rs1895342	0.0248005	0.0845476	0.769268	-0.140913	0.190514	1.02511	0.868565	1.20987	NA	NA	NA	0.906821	1
BCAC_OncoArray	1-lignoceroyl-GPC (24:0) levels	Wald ratio	rs174560	0.0718915	0.0637138	0.259172	-0.0529876	0.196771	1.07454	0.948392	1.21746	NA	NA	NA	0.531191	1
BCAC_OncoArray	1-linolenoyl-GPC (18:3) levels	Inverse variance weighted	3	0.155585	0.0620633	0.01218	0.0339415	0.277229	1.16834	1.03452	1.31947	0.277687	0.680321	TRUE	0.0815719	1
BCAC_OncoArray	1-linoleoyl-2-arachidonoyl-GPC (18:2_20:4n6) levels	Inverse variance weighted	19	-0.00795828	0.0192983	0.680059	-0.045783	0.0298664	0.992073	0.955249	1.03032	NA	NA	NA	0.863467	1
BCAC_OncoArray	1-linoleoyl-2-linolenoyl-GPC (18:2_18:3) levels	Inverse variance weighted	2	0.122748	0.0781339	0.116183	-0.0303942	0.275891	1.1306	0.970063	1.3177	NA	NA	NA	0.333943	1
BCAC_OncoArray	1-linoleoyl-gpc (18:2) levels	Inverse variance weighted	2	0.200724	0.0501019	6.16748e-05	0.102524	0.298924	1.22229	1.10796	1.34841	0.670725	NA	TRUE	0.00167579	0.0586527
BCAC_OncoArray	1-linoleoyl-GPE (18:2) levels	Inverse variance weighted	6	0.0925749	0.063688	0.146066	-0.0322535	0.217403	1.097	0.968261	1.24285	NA	NA	NA	0.377468	1
BCAC_OncoArray	1-linoleoyl-GPG (18:2) levels	Wald ratio	rs4149056	-0.0105021	0.0247297	0.671073	-0.0589724	0.0379681	0.989553	0.942733	1.0387	NA	NA	NA	0.857783	1
BCAC_OncoArray	1-linoleoyl-GPI (18:2) levels	Wald ratio	rs11668882	-0.188422	0.0532307	0.000400541	-0.292755	-0.0840901	0.828265	0.746205	0.919348	NA	NA	TRUE	0.0064607	0.380914
BCAC_OncoArray	1-methyl-4-imidazoleacetate levels	Wald ratio	rs10774021	0.0165746	0.0230293	0.471699	-0.0285628	0.0617119	1.01671	0.971841	1.06366	NA	NA	NA	0.713799	1
BCAC_OncoArray	1-methyl-5-imidazoleacetate levels	Wald ratio	rs7094385	0.120966	0.0760356	0.11163	-0.0280639	0.269996	1.12859	0.972326	1.30996	NA	NA	NA	0.324648	1
BCAC_OncoArray	1-methylhistidine levels	Inverse variance weighted	8	-0.054551	0.0236815	0.0212492	-0.100967	-0.00813524	0.94691	0.903963	0.991898	0.70493	0.687229	TRUE	0.114818	1
BCAC_OncoArray	1-methylnicotinamide levels	Wald ratio	rs3798167	0.017822	0.0851911	0.834292	-0.149152	0.184797	1.01798	0.861438	1.20297	NA	NA	NA	0.931234	1
BCAC_OncoArray	1-methylxanthine levels	Inverse variance weighted	15	-0.0203108	0.0227093	0.371117	-0.0648211	0.0241994	0.979894	0.937235	1.02449	NA	NA	NA	0.61061	1
BCAC_OncoArray	1-myristoyl-2-arachidonoyl-GPC (14:0_20:4) levels	Inverse variance weighted	16	-0.023647	0.0221423	0.28554	-0.067046	0.0197519	0.97663	0.935152	1.01995	NA	NA	NA	0.544698	1
BCAC_OncoArray	1-oleoyl-2-arachidonoyl-GPE (18:1_20:4) levels	Inverse variance weighted	19	0.00817638	0.016122	0.612046	-0.0234228	0.0397756	1.00821	0.976849	1.04058	NA	NA	NA	0.819978	1
BCAC_OncoArray	1-oleoyl-2-docosahexaenoyl-GPC (18:1_22:6) levels	Inverse variance weighted	6	-0.0399606	0.0458315	0.383262	-0.12979	0.0498692	0.960827	0.87828	1.05113	NA	NA	NA	0.620759	1
BCAC_OncoArray	1-oleoyl-2-linoleoyl-GPE (18:1_18:2) levels	Inverse variance weighted	17	0.0118031	0.0204313	0.563468	-0.0282423	0.0518485	1.01187	0.972153	1.05322	NA	NA	NA	0.789187	1
BCAC_OncoArray	1-oleoyl-GPC (18:1) levels	Inverse variance weighted	2	0.186911	0.046519	5.87072e-05	0.0957336	0.278088	1.20552	1.10047	1.3206	0.76755	NA	TRUE	0.00167579	0.0558306
BCAC_OncoArray	1-oleoyl-GPE (18:1) levels	Inverse variance weighted	3	0.0836808	0.0746698	0.262425	-0.062672	0.230033	1.08728	0.939252	1.25864	NA	NA	NA	0.53555	1
BCAC_OncoArray	1-oleoyl-GPG (18:1) levels	Inverse variance weighted	2	-0.0182222	0.0306601	0.552292	-0.078316	0.0418716	0.981943	0.924672	1.04276	NA	NA	NA	0.783783	1
BCAC_OncoArray	1-oleoyl-GPI (18:1) levels	Inverse variance weighted	3	-0.138898	0.0784833	0.076765	-0.292725	0.0149297	0.870317	0.746227	1.01504	NA	NA	NA	0.257884	1
BCAC_OncoArray	1-oleoylglycerol (18:1) levels	Inverse variance weighted	3	0.00930719	0.0538389	0.862753	-0.096217	0.114831	1.00935	0.908267	1.12168	NA	NA	NA	0.93752	1
BCAC_OncoArray	1-palmitoleoyl-2-linolenoyl-GPC (16:1_18:3) levels	Inverse variance weighted	7	-0.0387195	0.0247277	0.117387	-0.0871858	0.00974671	0.96202	0.916507	1.00979	NA	NA	NA	0.335239	1
BCAC_OncoArray	1-palmitoleoyl-GPC (16:1) levels	Inverse variance weighted	6	0.0308259	0.0632869	0.6262	-0.0932165	0.154868	1.03131	0.910996	1.1675	NA	NA	NA	0.827106	1
BCAC_OncoArray	1-palmitoyl-2-arachidonoyl-gpc (16:0_20:4n6) levels	Inverse variance weighted	28	0.00621787	0.00994985	0.532023	-0.0132838	0.0257196	1.00624	0.986804	1.02605	NA	NA	NA	0.768926	1
BCAC_OncoArray	1-palmitoyl-2-arachidonoyl-GPE (16:0_20:4) levels	Inverse variance weighted	17	0.0137985	0.0158083	0.382736	-0.0171857	0.0447827	1.01389	0.982961	1.0458	NA	NA	NA	0.620759	1
BCAC_OncoArray	1-palmitoyl-2-arachidonoyl-GPI (16:0_20:4) levels	Inverse variance weighted	5	0.0378187	0.032304	0.241713	-0.025497	0.101135	1.03854	0.974825	1.10643	NA	NA	NA	0.51157	1
BCAC_OncoArray	1-palmitoyl-2-dihomo-linolenoyl-GPC (16:0_20:3n3 or 6) levels	Inverse variance weighted	9	-0.0100003	0.0329131	0.761251	-0.0745099	0.0545094	0.99005	0.928198	1.05602	NA	NA	NA	0.903807	1
BCAC_OncoArray	1-palmitoyl-2-docosahexaenoyl-gpc (16:0_22:6) levels	Inverse variance weighted	5	-0.0494388	0.0317308	0.119216	-0.111631	0.0127535	0.951763	0.894374	1.01284	NA	NA	NA	0.339444	1
BCAC_OncoArray	1-palmitoyl-2-docosahexaenoyl-GPE (16:0_22:6) levels	Inverse variance weighted	20	0.0166511	0.011898	0.161668	-0.00666906	0.0399712	1.01679	0.993353	1.04078	NA	NA	NA	0.406737	1
BCAC_OncoArray	1-palmitoyl-2-linoleoyl-gpc (16:0_18:2) levels	Inverse variance weighted	11	-0.00349758	0.0206003	0.865181	-0.0438741	0.036879	0.996509	0.957074	1.03757	NA	NA	NA	0.93752	1
BCAC_OncoArray	1-palmitoyl-2-linoleoyl-GPE (16:0_18:2) levels	Inverse variance weighted	27	0.00709755	0.0111446	0.524215	-0.0147458	0.0289409	1.00712	0.985362	1.02936	NA	NA	NA	0.763443	1
BCAC_OncoArray	1-palmitoyl-2-linoleoyl-GPI (16:0_18:2) levels	Inverse variance weighted	9	-0.118063	0.0276668	1.97848e-05	-0.17229	-0.0638358	0.88864	0.841735	0.938159	0.142019	0.56366	TRUE	0.000696863	0.0188153
BCAC_OncoArray	1-palmitoyl-2-oleoyl-gpc (16:0_18:1) levels	Inverse variance weighted	2	-0.018102	0.0655729	0.782502	-0.146625	0.110421	0.982061	0.863618	1.11675	NA	NA	NA	0.913079	1
BCAC_OncoArray	1-palmitoyl-2-oleoyl-GPE (16:0_18:1) levels	Inverse variance weighted	14	0.00569054	0.0169115	0.736501	-0.0274559	0.038837	1.00571	0.972918	1.0396	NA	NA	NA	0.887863	1
BCAC_OncoArray	1-palmitoyl-2-oleoyl-GPI (16:0_18:1) levels	Inverse variance weighted	6	-0.0680029	0.0330823	0.0398241	-0.132844	-0.00316165	0.934258	0.875602	0.996843	0.153744	0.0708595	TRUE	0.164406	1
BCAC_OncoArray	1-palmitoyl-2-stearoyl-gpc (16:0_18:0) levels	Inverse variance weighted	4	0.0323223	0.0273087	0.236576	-0.0212028	0.0858474	1.03285	0.97902	1.08964	NA	NA	NA	0.509548	1
BCAC_OncoArray	1-palmitoyl-GPC (16:0) levels	Inverse variance weighted	3	0.131497	0.0359512	0.000254532	0.0610328	0.201962	1.14053	1.06293	1.2238	0.373042	0.709691	TRUE	0.00452058	0.24206
BCAC_OncoArray	1-palmitoyl-GPE (16:0) levels	Inverse variance weighted	8	0.032391	0.0451858	0.473473	-0.0561733	0.120955	1.03292	0.945375	1.12857	NA	NA	NA	0.713799	1
BCAC_OncoArray	1-palmitoyl-GPG (16:0) levels	Wald ratio	rs1601935	-0.016233	0.0719414	0.82148	-0.157238	0.124772	0.983898	0.854501	1.13289	NA	NA	NA	0.926723	1
BCAC_OncoArray	1-ribosyl-imidazoleacetate levels	Inverse variance weighted	4	0.022568	0.0382868	0.555562	-0.0524741	0.0976101	1.02282	0.948879	1.10253	NA	NA	NA	0.784529	1
BCAC_OncoArray	1-stearoyl-2-arachidonoyl-gpc (18:0_20:4) levels	Inverse variance weighted	37	0.00127087	0.00934401	0.891814	-0.0170434	0.0195851	1.00127	0.983101	1.01978	NA	NA	NA	0.93752	1
BCAC_OncoArray	1-stearoyl-2-arachidonoyl-GPE (18:0_20:4) levels	Inverse variance weighted	17	0.00500889	0.0170943	0.769511	-0.0284959	0.0385137	1.00502	0.971906	1.03926	NA	NA	NA	0.906821	1
BCAC_OncoArray	1-stearoyl-2-arachidonoyl-GPI (18:0_20:4) levels	Inverse variance weighted	16	0.00140708	0.016131	0.93049	-0.0302097	0.0330238	1.00141	0.970242	1.03358	NA	NA	NA	0.956644	1
BCAC_OncoArray	1-stearoyl-2-docosahexaenoyl-gpc (18:0_22:6) levels	Inverse variance weighted	6	-0.00124581	0.0303938	0.967305	-0.0608177	0.0583261	0.998755	0.940995	1.06006	NA	NA	NA	0.976856	1
BCAC_OncoArray	1-stearoyl-2-docosahexaenoyl-GPE (18:0_22:6) levels	Inverse variance weighted	9	0.0215149	0.0250235	0.389907	-0.0275312	0.070561	1.02175	0.972844	1.07311	NA	NA	NA	0.626699	1
BCAC_OncoArray	1-stearoyl-2-linoleoyl-gpc (18:0_18:2) levels	Inverse variance weighted	4	0.0412322	0.0449328	0.358807	-0.0468362	0.129301	1.04209	0.954244	1.13803	NA	NA	NA	0.602872	1
BCAC_OncoArray	1-stearoyl-2-linoleoyl-GPE (18:0_18:2) levels	Inverse variance weighted	11	-0.00344331	0.024779	0.889481	-0.0520101	0.0451234	0.996563	0.949319	1.04616	NA	NA	NA	0.93752	1
BCAC_OncoArray	1-stearoyl-2-linoleoyl-GPI (18:0_18:2) levels	Inverse variance weighted	9	-0.039324	0.025707	0.126091	-0.0897098	0.0110618	0.961439	0.914196	1.01112	NA	NA	NA	0.3496	1
BCAC_OncoArray	1-stearoyl-2-oleoyl-gpc (18:0_18:1) levels	Inverse variance weighted	2	-0.0536767	0.0563938	0.341189	-0.164208	0.0568551	0.947738	0.848565	1.0585	NA	NA	NA	0.587809	1
BCAC_OncoArray	1-stearoyl-2-oleoyl-GPE (18:0_18:1) levels	Inverse variance weighted	7	-0.00399167	0.0295104	0.892404	-0.0618321	0.0538487	0.996016	0.940041	1.05532	NA	NA	NA	0.93752	1
BCAC_OncoArray	1-stearoyl-2-oleoyl-GPI (18:0_18:1) levels	Inverse variance weighted	11	-0.0444735	0.0229013	0.0521415	-0.08936	0.000413057	0.956501	0.914516	1.00041	NA	NA	NA	0.195223	1
BCAC_OncoArray	1-stearoyl-2-oleoyl-GPS (18:0_18:1) levels	Wald ratio	rs1354034	0.00775233	0.0582604	0.894143	-0.106438	0.121943	1.00778	0.899031	1.12969	NA	NA	NA	0.93752	1
BCAC_OncoArray	1-stearoyl-gpc (18:0) levels	Inverse variance weighted	4	0.147669	0.0363687	4.90031e-05	0.0763864	0.218952	1.15913	1.07938	1.24477	0.803535	0.43113	TRUE	0.00150329	0.0466019
BCAC_OncoArray	1-stearoyl-GPE (18:0) levels	Inverse variance weighted	12	0.0291813	0.0290839	0.315693	-0.0278232	0.0861858	1.02961	0.97256	1.09001	NA	NA	NA	0.568138	1
BCAC_OncoArray	1-stearoyl-GPG (18:0) levels	Inverse variance weighted	3	-0.0487504	0.0447061	0.275509	-0.136374	0.0388736	0.952419	0.872516	1.03964	NA	NA	NA	0.538379	1
BCAC_OncoArray	1,2-dilinoleoyl-GPC (18:2_18:2) levels	Inverse variance weighted	5	0.0147244	0.0622572	0.813038	-0.1073	0.136749	1.01483	0.898256	1.14654	NA	NA	NA	0.920475	1
BCAC_OncoArray	1,2-dilinoleoyl-GPE (18:2_18:2) levels	Inverse variance weighted	2	-0.0184635	0.0546029	0.735257	-0.125485	0.0885582	0.981706	0.882069	1.0926	NA	NA	NA	0.887863	1
BCAC_OncoArray	1,2-dipalmitoyl-gpc (16:0_16:0) levels	Inverse variance weighted	14	0.0242706	0.0208118	0.243535	-0.0165204	0.0650617	1.02457	0.983615	1.06722	NA	NA	NA	0.51157	1
BCAC_OncoArray	1,3-dimethylurate levels	Inverse variance weighted	2	-0.155416	0.0522641	0.00294269	-0.257853	-0.0529781	0.856059	0.772709	0.948401	0.616929	NA	TRUE	0.0271699	1
BCAC_OncoArray	1,3,7-trimethylurate levels	Inverse variance weighted	3	-0.0283966	0.0538693	0.598098	-0.133981	0.0771873	0.972003	0.874607	1.08024	NA	NA	NA	0.813713	1
BCAC_OncoArray	1,5-anhydroglucitol (1,5-ag) levels	Inverse variance weighted	16	0.0634567	0.0278581	0.022735	0.00885492	0.118059	1.06551	1.00889	1.12531	0.0227496	0.014028	TRUE	0.119453	1
BCAC_OncoArray	10-undecenoate (11:1n1) levels	Inverse variance weighted	9	-0.0299767	0.0142804	0.0358035	-0.0579662	-0.00198714	0.970468	0.943682	0.998015	0.938976	0.369711	TRUE	0.155221	1
BCAC_OncoArray	11beta-hydroxyandrosterone glucuronide levels	Inverse variance weighted	27	0.0569134	0.019415	0.00337421	0.01886	0.0949668	1.05856	1.01904	1.09962	0.00164794	0.000347489	TRUE	0.0297118	1
BCAC_OncoArray	11beta-hydroxyetiocholanolone glucuronide levels	Inverse variance weighted	3	0.0481866	0.0422874	0.254494	-0.0346967	0.13107	1.04937	0.965898	1.14005	NA	NA	NA	0.527883	1
BCAC_OncoArray	16a-hydroxy DHEA 3-sulfate levels	Inverse variance weighted	29	-0.020795	0.00833294	0.0125772	-0.0371276	-0.00446246	0.97942	0.963553	0.995547	0.897732	0.0531794	TRUE	0.0830621	1
BCAC_OncoArray	17alpha-hydroxypregnanolone glucuronide levels	Inverse variance weighted	13	0.010184	0.0135184	0.451242	-0.016312	0.0366801	1.01024	0.98382	1.03736	NA	NA	NA	0.694155	1
BCAC_OncoArray	2'-deoxyuridine levels	Inverse variance weighted	7	-0.000538211	0.0197956	0.97831	-0.0393377	0.0382612	0.999462	0.961426	1.039	NA	NA	NA	0.984521	1
BCAC_OncoArray	2'-deoxyuridine to cytidine ratio	Inverse variance weighted	3	0.00719745	0.0501118	0.885794	-0.0910217	0.105417	1.00722	0.912998	1.11117	NA	NA	NA	0.93752	1
BCAC_OncoArray	2'-o-methylcytidine levels	Inverse variance weighted	51	-0.00696751	0.00719538	0.332879	-0.0210705	0.00713544	0.993057	0.97915	1.00716	NA	NA	NA	0.577679	1
BCAC_OncoArray	2'-o-methyluridine levels	Inverse variance weighted	53	-0.00715772	0.00656513	0.275597	-0.0200254	0.00570993	0.992868	0.980174	1.00573	NA	NA	NA	0.538379	1
BCAC_OncoArray	2-aminobutyrate levels	Inverse variance weighted	3	-0.0509133	0.110217	0.644126	-0.266938	0.165111	0.950361	0.76572	1.17952	NA	NA	NA	0.840279	1
BCAC_OncoArray	2-aminooctanoate levels	Inverse variance weighted	31	-0.0145942	0.00886727	0.0997934	-0.0319741	0.0027856	0.985512	0.968532	1.00279	NA	NA	NA	0.301281	1
BCAC_OncoArray	2-butenoylglycine levels	Inverse variance weighted	8	0.03606	0.019839	0.0691205	-0.00282446	0.0749446	1.03672	0.99718	1.07782	NA	NA	NA	0.243458	1
BCAC_OncoArray	2-hydroxy-3-methylvalerate levels	Inverse variance weighted	3	0.00742565	0.0527006	0.887947	-0.0958674	0.110719	1.00745	0.908584	1.11708	NA	NA	NA	0.93752	1
BCAC_OncoArray	2-hydroxy-4-(methylthio)butanoic acid levels	Inverse variance weighted	37	-0.0519941	0.00841699	6.52163e-10	-0.0684914	-0.0354968	0.949334	0.933802	0.965126	0.901029	0.277451	TRUE	7.75259e-08	6.20207e-07
BCAC_OncoArray	2-hydroxydecanoate levels	Inverse variance weighted	5	0.0393884	0.0428048	0.357475	-0.044509	0.123286	1.04017	0.956467	1.13121	NA	NA	NA	0.602449	1
BCAC_OncoArray	2-hydroxyglutarate levels	Inverse variance weighted	2	-0.0430871	0.0496038	0.385052	-0.140311	0.0541363	0.957828	0.869088	1.05563	NA	NA	NA	0.621705	1
BCAC_OncoArray	2-hydroxyoctanoate levels	Inverse variance weighted	9	-0.0184985	0.0193243	0.338434	-0.0563742	0.0193772	0.981672	0.945185	1.01957	NA	NA	NA	0.584122	1
BCAC_OncoArray	2-hydroxyphenylacetate levels	Wald ratio	rs2977995	-0.0554804	0.0510783	0.277398	-0.155594	0.0446331	0.946031	0.855907	1.04564	NA	NA	NA	0.538379	1
BCAC_OncoArray	2-hydroxysebacate levels	Inverse variance weighted	7	0.0481484	0.0247131	0.0513793	-0.000289198	0.0965861	1.04933	0.999711	1.1014	NA	NA	NA	0.193129	1
BCAC_OncoArray	2-ketocaprylate levels	Inverse variance weighted	14	-0.00823573	0.0138737	0.552766	-0.0354282	0.0189568	0.991798	0.965192	1.01914	NA	NA	NA	0.783783	1
BCAC_OncoArray	2-o-methylascorbic acid levels	Inverse variance weighted	23	0.00205016	0.0108488	0.850112	-0.0192135	0.0233139	1.00205	0.98097	1.02359	NA	NA	NA	0.93752	1
BCAC_OncoArray	2-oxoarginine levels	Inverse variance weighted	2	0.0654207	0.0930223	0.481881	-0.116903	0.247744	1.06761	0.889671	1.28113	NA	NA	NA	0.722822	1
BCAC_OncoArray	2-palmitoleoyl-GPC (16:1) levels	Wald ratio	rs603424	-0.00405938	0.0687855	0.95294	-0.138879	0.13076	0.995949	0.870333	1.13969	NA	NA	NA	0.968212	1
BCAC_OncoArray	2-palmitoyl-GPC (16:0) levels	Inverse variance weighted	2	0.197347	0.052464	0.000168846	0.0945179	0.300177	1.21817	1.09913	1.3501	0.743191	NA	TRUE	0.00343491	0.160573
BCAC_OncoArray	2-stearoyl-GPE (18:0) levels	Inverse variance weighted	4	0.120176	0.049048	0.0142786	0.0240422	0.21631	1.1277	1.02433	1.24149	0.154119	0.440783	TRUE	0.0911336	1
BCAC_OncoArray	2,2'-Methylenebis(6-tert-butyl-p-cresol) levels	Wald ratio	rs11744583	-0.0524905	0.0919828	0.568234	-0.232777	0.127796	0.948863	0.79233	1.13632	NA	NA	NA	0.791644	1
BCAC_OncoArray	2,3-dihydroxy-5-methylthio-4-pentenoate (dmtpa) levels	Inverse variance weighted	2	-0.0690631	0.0633991	0.276004	-0.193325	0.0551991	0.933268	0.824214	1.05675	NA	NA	NA	0.538379	1
BCAC_OncoArray	2,6-dihydroxybenzoic acid levels	Inverse variance weighted	2	-0.0580727	0.111685	0.603086	-0.276976	0.16083	0.943581	0.758073	1.17449	NA	NA	NA	0.817334	1
BCAC_OncoArray	21-hydroxypregnenolone disulfate levels	Inverse variance weighted	10	0.0692228	0.0313561	0.0272698	0.00776482	0.130681	1.07167	1.0078	1.1396	0.0513502	0.143298	TRUE	0.1352	1
BCAC_OncoArray	2R,3R-dihydroxybutyrate levels	Inverse variance weighted	14	-0.029762	0.0213228	0.162781	-0.0715547	0.0120308	0.970677	0.930945	1.0121	NA	NA	NA	0.408428	1
BCAC_OncoArray	2s,3R-dihydroxybutyrate levels	Wald ratio	rs17177326	-0.0371965	0.0610311	0.542214	-0.156818	0.0824245	0.963487	0.85486	1.08592	NA	NA	NA	0.779247	1
BCAC_OncoArray	3-(3-amino-3-carboxypropyl)uridine levels	Inverse variance weighted	2	0.0637325	0.0947783	0.501305	-0.122033	0.249498	1.06581	0.885119	1.28338	NA	NA	NA	0.740281	1
BCAC_OncoArray	3-(4-hydroxyphenyl)lactate levels	Inverse variance weighted	3	0.0431856	0.0487208	0.375408	-0.0523072	0.138678	1.04413	0.949037	1.14875	NA	NA	NA	0.616603	1
BCAC_OncoArray	3-amino-2-piperidone levels	Inverse variance weighted	3	0.022869	0.0481118	0.634552	-0.0714302	0.117168	1.02313	0.931061	1.12431	NA	NA	NA	0.833506	1
BCAC_OncoArray	3-aminoisobutyrate levels	Inverse variance weighted	30	0.0367513	0.0111627	0.000993612	0.0148724	0.0586301	1.03743	1.01498	1.06038	0.158191	0.388957	TRUE	0.013124	0.944925
BCAC_OncoArray	3-bromo-5-chloro-2,6-dihydroxybenzoic acid levels	Inverse variance weighted	5	-0.0895285	0.0430466	0.0375438	-0.1739	-0.00515705	0.914362	0.840381	0.994856	0.116397	0.088152	TRUE	0.159393	1
BCAC_OncoArray	3-carboxy-4-methyl-5-pentyl-2-furanpropionate (3-CMPFP) levels	Inverse variance weighted	20	-0.0315485	0.0159127	0.0474132	-0.0627374	-0.000359481	0.968944	0.93919	0.999641	0.98637	0.136242	TRUE	0.183653	1
BCAC_OncoArray	3-carboxy-4-methyl-5-propyl-2-furanpropanoate (cmpf) levels	Wald ratio	rs2328895	0.116671	0.079076	0.140096	-0.0383175	0.27166	1.12375	0.962407	1.31214	NA	NA	NA	0.371117	1
BCAC_OncoArray	3-formylindole levels	Inverse variance weighted	22	0.0250128	0.0155687	0.108141	-0.00550189	0.0555276	1.02533	0.994513	1.0571	NA	NA	NA	0.322314	1
BCAC_OncoArray	3-hydroxy-2-ethylpropionate levels	Inverse variance weighted	3	-0.013387	0.0392042	0.732752	-0.0902272	0.0634533	0.986702	0.913724	1.06551	NA	NA	NA	0.887863	1
BCAC_OncoArray	3-hydroxy-2-methylpyridine sulfate levels	Wald ratio	rs2472297	0.167516	0.095613	0.0797707	-0.0198858	0.354917	1.18236	0.980311	1.42606	NA	NA	NA	0.261662	1
BCAC_OncoArray	3-hydroxybutyroylglycine levels	Inverse variance weighted	15	0.0190635	0.0147637	0.196621	-0.00987338	0.0480003	1.01925	0.990175	1.04917	NA	NA	NA	0.451658	1
BCAC_OncoArray	3-hydroxydecanoate levels	Inverse variance weighted	4	0.00205335	0.0243579	0.932819	-0.0456881	0.0497948	1.00206	0.95534	1.05106	NA	NA	NA	0.957929	1
BCAC_OncoArray	3-hydroxydecanoylcarnitine levels	Wald ratio	rs924135	0.0901027	0.092036	0.327583	-0.0902878	0.270493	1.09429	0.913668	1.31061	NA	NA	NA	0.574017	1
BCAC_OncoArray	3-hydroxydodecanedioate levels	Wald ratio	rs4284207	0.0509792	0.0769201	0.507487	-0.0997842	0.201743	1.0523	0.905033	1.22353	NA	NA	NA	0.74709	1
BCAC_OncoArray	3-hydroxyhexanoate levels	Inverse variance weighted	3	-0.00103025	0.0506086	0.983758	-0.100223	0.0981626	0.99897	0.904636	1.10314	NA	NA	NA	0.988958	1
BCAC_OncoArray	3-hydroxyhexanoylcarnitine (1) levels	Inverse variance weighted	6	0.0516723	0.0294951	0.0797918	-0.00613806	0.109483	1.05303	0.993881	1.1157	NA	NA	NA	0.261662	1
BCAC_OncoArray	3-hydroxylaurate levels	Inverse variance weighted	3	-0.0101266	0.0558446	0.856104	-0.119582	0.0993288	0.989925	0.887291	1.10443	NA	NA	NA	0.93752	1
BCAC_OncoArray	3-hydroxyoctanoate levels	Inverse variance weighted	3	0.0149201	0.0446896	0.738485	-0.0726715	0.102512	1.01503	0.929906	1.10795	NA	NA	NA	0.887863	1
BCAC_OncoArray	3-hydroxyoctanoylcarnitine (1) levels	Inverse variance weighted	2	-0.0291469	0.115693	0.801093	-0.255905	0.197612	0.971274	0.774215	1.21849	NA	NA	NA	0.918399	1
BCAC_OncoArray	3-hydroxyoctanoylcarnitine (2) levels	Inverse variance weighted	2	-0.0336871	0.112981	0.765577	-0.25513	0.187756	0.966874	0.774816	1.20654	NA	NA	NA	0.906603	1
BCAC_OncoArray	3-hydroxyoleoylcarnitine levels	Inverse variance weighted	2	-0.219255	0.0773534	0.00459029	-0.370868	-0.0676427	0.803117	0.690135	0.934594	0.150832	NA	TRUE	0.0379597	1
BCAC_OncoArray	3-hydroxysebacate levels	Inverse variance weighted	7	0.0321238	0.0250095	0.19898	-0.0168949	0.0811424	1.03265	0.983247	1.08453	NA	NA	NA	0.455561	1
BCAC_OncoArray	3-indoleglyoxylic acid levels	Inverse variance weighted	12	0.0288716	0.0188435	0.125479	-0.00806172	0.065805	1.02929	0.991971	1.06802	NA	NA	NA	0.3496	1
BCAC_OncoArray	3-methoxycatechol sulfate (2) levels	Wald ratio	rs144886872	0.0278446	0.113518	0.806233	-0.19465	0.25034	1.02824	0.823122	1.28446	NA	NA	NA	0.919379	1
BCAC_OncoArray	3-methoxytyramine sulfate levels	Wald ratio	rs10840516	0.0438931	0.0728193	0.546664	-0.0988329	0.186619	1.04487	0.905894	1.20517	NA	NA	NA	0.78203	1
BCAC_OncoArray	3-methoxytyrosine levels	Inverse variance weighted	11	0.00275203	0.0216371	0.89879	-0.0396567	0.0451607	1.00276	0.961119	1.0462	NA	NA	NA	0.939911	1
BCAC_OncoArray	3-methyl-2-oxobutyrate levels	Wald ratio	rs1129043	0.0495273	0.061117	0.417728	-0.070262	0.169317	1.05077	0.93215	1.1845	NA	NA	NA	0.654464	1
BCAC_OncoArray	3-methyl-2-oxovalerate to 3-methyl-2-oxobutyrate ratio	Wald ratio	rs78177403	0.0219	0.0989528	0.824845	-0.172048	0.215848	1.02214	0.841939	1.24091	NA	NA	NA	0.928513	1
BCAC_OncoArray	3-methylcytidine levels	Inverse variance weighted	42	0.00155897	0.00602735	0.795906	-0.0102546	0.0133726	1.00156	0.989798	1.01346	NA	NA	NA	0.917463	1
BCAC_OncoArray	3-methylglutaconate levels	Inverse variance weighted	21	0.022158	0.0116205	0.0565476	-0.000618311	0.0449342	1.02241	0.999382	1.04596	NA	NA	NA	0.209248	1
BCAC_OncoArray	3-methylglutarylcarnitine (2) levels	Inverse variance weighted	26	0.004202	0.0142078	0.767419	-0.0236453	0.0320493	1.00421	0.976632	1.03257	NA	NA	NA	0.906603	1
BCAC_OncoArray	3-methylxanthine levels	Wald ratio	rs56113850	-0.0911112	0.0823649	0.268645	-0.252546	0.0703241	0.912916	0.77682	1.07286	NA	NA	NA	0.5356	1
BCAC_OncoArray	3-phosphoglycerate to adenosine 5'-diphosphate (ADP) ratio	Wald ratio	rs72663992	-0.124105	0.0703006	0.0775045	-0.261894	0.0136838	0.883287	0.769592	1.01378	NA	NA	NA	0.25862	1
BCAC_OncoArray	3-ureidopropionate levels	Wald ratio	rs140330	-0.155023	0.0654106	0.0177883	-0.283227	-0.026818	0.856396	0.753348	0.973538	NA	NA	TRUE	0.104424	1
BCAC_OncoArray	3,4-dihydroxybutyrate levels	Inverse variance weighted	3	-0.0631028	0.0349703	0.0711575	-0.131645	0.00543889	0.938847	0.876653	1.00545	NA	NA	NA	0.246076	1
BCAC_OncoArray	3,5-dichloro-2,6-dihydroxybenzoic acid levels	Inverse variance weighted	6	-0.102665	0.0288594	0.000374492	-0.15923	-0.0461011	0.902429	0.8528	0.954945	0.198246	0.109005	TRUE	0.00635967	0.356142
BCAC_OncoArray	3b-hydroxy-5-cholenoic acid levels	Wald ratio	rs10426201	0.143033	0.0661115	0.0305021	0.0134542	0.272611	1.15377	1.01355	1.31339	NA	NA	TRUE	0.142056	1
BCAC_OncoArray	3beta-hydroxy-5-cholestenoate levels	Inverse variance weighted	25	-0.0143146	0.0119578	0.23127	-0.0377519	0.00912265	0.985787	0.962952	1.00916	NA	NA	NA	0.504443	1
BCAC_OncoArray	4-acetamidobutanoate levels	Inverse variance weighted	6	0.0427102	0.0233429	0.0672969	-0.0030419	0.0884624	1.04364	0.996963	1.09249	NA	NA	NA	0.237916	1
BCAC_OncoArray	4-allylphenol sulfate levels	Wald ratio	rs9467618	-0.175398	0.0724954	0.0155444	-0.317489	-0.0333073	0.839123	0.727974	0.967241	NA	NA	TRUE	0.0966192	1
BCAC_OncoArray	4-cholesten-3-one levels	Inverse variance weighted	2	-0.0393594	0.0841173	0.639849	-0.204229	0.125511	0.961405	0.815275	1.13373	NA	NA	NA	0.836996	1
BCAC_OncoArray	4-ethylphenylsulfate levels	Wald ratio	rs3799346	-0.178541	0.0949217	0.0599815	-0.364587	0.00750551	0.83649	0.694483	1.00753	NA	NA	NA	0.220241	1
BCAC_OncoArray	4-guanidinobutanoate levels	Inverse variance weighted	40	-0.00474413	0.00806136	0.556195	-0.0205444	0.0110561	0.995267	0.979665	1.01112	NA	NA	NA	0.784529	1
BCAC_OncoArray	4-hydroxychlorothalonil levels	Inverse variance weighted	11	-0.0717034	0.0150957	2.03489e-06	-0.101291	-0.0421159	0.930807	0.90367	0.958759	0.587941	0.227626	TRUE	8.79627e-05	0.00193518
BCAC_OncoArray	4-hydroxyglutamate levels	Wald ratio	rs7078003	0.029627	0.0638238	0.642505	-0.0954677	0.154722	1.03007	0.908948	1.16733	NA	NA	NA	0.839316	1
BCAC_OncoArray	4-hydroxyphenylacetate levels	Wald ratio	rs4438875	-0.0392416	0.0944931	0.677933	-0.224448	0.145965	0.961518	0.798957	1.15716	NA	NA	NA	0.863071	1
BCAC_OncoArray	4-hydroxyphenylacetoylcarnitine levels	Inverse variance weighted	6	0.0197744	0.0234936	0.399961	-0.0262732	0.0658219	1.01997	0.974069	1.06804	NA	NA	NA	0.636058	1
BCAC_OncoArray	4-hydroxyphenylacetylglutamine levels	Inverse variance weighted	3	0.0586803	0.0497577	0.238271	-0.0388448	0.156205	1.06044	0.9619	1.16907	NA	NA	NA	0.509548	1
BCAC_OncoArray	4-hydroxyphenylpyruvate levels	Wald ratio	rs71456122	0.0154509	0.108973	0.887249	-0.198137	0.229038	1.01557	0.820258	1.25739	NA	NA	NA	0.93752	1
BCAC_OncoArray	4-methoxyphenol sulfate levels	Wald ratio	rs72639855	-0.0696367	0.100783	0.489593	-0.267172	0.127898	0.932733	0.765542	1.13644	NA	NA	NA	0.728643	1
BCAC_OncoArray	4-methyl-2-oxopentanoate levels	Wald ratio	rs893971	0.0527849	0.086717	0.542722	-0.11718	0.22275	1.0542	0.889425	1.24951	NA	NA	NA	0.779247	1
BCAC_OncoArray	4-methyl-2-oxopentanoate to 3-methyl-2-oxobutyrate ratio	Wald ratio	rs117351628	0.346276	0.0974816	0.000382004	0.155212	0.53734	1.41379	1.16791	1.71145	NA	NA	TRUE	0.00637344	0.363286
BCAC_OncoArray	4-methylhexanoylglutamine levels	Inverse variance weighted	6	-0.0286971	0.0205804	0.163199	-0.0690346	0.0116404	0.971711	0.933294	1.01171	NA	NA	NA	0.408428	1
BCAC_OncoArray	4-oxo-retinoic acid levels	Inverse variance weighted	2	-0.0354128	0.049417	0.473614	-0.13227	0.0614446	0.965207	0.876104	1.06337	NA	NA	NA	0.713799	1
BCAC_OncoArray	4-vinylphenol sulfate levels	Wald ratio	rs78237766	0.0490367	0.0978888	0.616411	-0.142825	0.240899	1.05026	0.866906	1.27239	NA	NA	NA	0.821278	1
BCAC_OncoArray	5-(galactosylhydroxy)-L-lysine levels	Wald ratio	rs35328001	0.0598639	0.0816802	0.463616	-0.100229	0.219957	1.06169	0.90463	1.24602	NA	NA	NA	0.70884	1
BCAC_OncoArray	5-acetylamino-6-amino-3-methyluracil levels	Inverse variance weighted	11	0.0329216	0.0164957	0.0459591	0.000590023	0.0652532	1.03347	1.00059	1.06743	0.54274	0.297139	TRUE	0.179865	1
BCAC_OncoArray	5-acetylamino-6-formylamino-3-methyluracil levels	Inverse variance weighted	36	0.0033284	0.00737646	0.651831	-0.0111295	0.0177863	1.00333	0.988932	1.01795	NA	NA	NA	0.846846	1
BCAC_OncoArray	5-dodecenoate (12:1n7) levels	Wald ratio	rs603424	-0.00529527	0.0897272	0.95294	-0.181161	0.17057	0.994719	0.834301	1.18598	NA	NA	NA	0.968212	1
BCAC_OncoArray	5-dodecenoylcarnitine (C12:1) levels	Inverse variance weighted	2	-0.0167541	0.0593081	0.777565	-0.132998	0.0994897	0.983385	0.875467	1.10461	NA	NA	NA	0.910671	1
BCAC_OncoArray	5-hydroxy-2-methylpyridine sulfate levels	Wald ratio	rs2472297	0.145296	0.0829308	0.0797707	-0.0172481	0.307841	1.15638	0.9829	1.36048	NA	NA	NA	0.261662	1
BCAC_OncoArray	5-hydroxyindole sulfate levels	Inverse variance weighted	3	0.0104398	0.0531808	0.84437	-0.0937946	0.114674	1.01049	0.91047	1.12151	NA	NA	NA	0.93752	1
BCAC_OncoArray	5-hydroxylysine levels	Inverse variance weighted	25	-0.0209413	0.010092	0.0379825	-0.0407216	-0.00116102	0.979276	0.960096	0.99884	0.274082	0.801068	TRUE	0.160099	1
BCAC_OncoArray	5-methylthioadenosine (mta) levels	Inverse variance weighted	7	-0.00882501	0.0322008	0.784037	-0.0719386	0.0542885	0.991214	0.930588	1.05579	NA	NA	NA	0.913492	1
BCAC_OncoArray	5-methylthioadenosine (MTA) to phosphate ratio	Inverse variance weighted	6	-0.0136175	0.0335182	0.684544	-0.0793131	0.0520782	0.986475	0.923751	1.05346	NA	NA	NA	0.865693	1
BCAC_OncoArray	5-methyluridine (ribothymidine) levels	Inverse variance weighted	24	-0.00475729	0.0126837	0.707608	-0.0296174	0.0201028	0.995254	0.970817	1.02031	NA	NA	NA	0.88011	1
BCAC_OncoArray	5-oxoproline levels	Inverse variance weighted	13	-0.014823	0.0136315	0.276856	-0.0415407	0.0118947	0.985286	0.95931	1.01197	NA	NA	NA	0.538379	1
BCAC_OncoArray	5-oxoproline to citrate ratio	Inverse variance weighted	14	-0.0173608	0.0141176	0.218799	-0.0450312	0.0103097	0.982789	0.955968	1.01036	NA	NA	NA	0.487817	1
BCAC_OncoArray	5,6-dihydrothymine levels	Wald ratio	rs131755	0.08263	0.0898098	0.357543	-0.0933971	0.258657	1.08614	0.910832	1.29519	NA	NA	NA	0.602449	1
BCAC_OncoArray	5,6-dihydrouridine levels	Inverse variance weighted	7	-0.0765539	0.0296064	0.00971741	-0.134582	-0.0185255	0.926303	0.874081	0.981645	0.907227	0.572114	TRUE	0.0694831	1
BCAC_OncoArray	5alpha-androstan-3alpha,17alpha-diol monosulfate levels	Inverse variance weighted	21	0.0316002	0.0152338	0.0380467	0.001742	0.0614585	1.0321	1.00174	1.06339	0.00201202	0.0819434	TRUE	0.160099	1
BCAC_OncoArray	5alpha-androstan-3alpha,17beta-diol disulfate levels	Wald ratio	rs28505302	0.184821	0.0767131	0.0159856	0.0344629	0.335178	1.203	1.03506	1.39819	NA	NA	TRUE	0.0980083	1
BCAC_OncoArray	5alpha-androstan-3alpha,17beta-diol monosulfate (1) levels	Inverse variance weighted	30	0.0360647	0.0102019	0.000407615	0.016069	0.0560603	1.03672	1.0162	1.05766	0.000910957	0.713116	TRUE	0.0064607	0.387642
BCAC_OncoArray	5alpha-androstan-3alpha,17beta-diol monosulfate (2) levels	Inverse variance weighted	4	0.0894683	0.0332384	0.00710858	0.024321	0.154616	1.09359	1.02462	1.16721	0.589746	0.739346	TRUE	0.0545182	1
BCAC_OncoArray	5alpha-androstan-3beta,17alpha-diol disulfate levels	Inverse variance weighted	5	-0.0120572	0.0627393	0.847601	-0.135026	0.110912	0.988015	0.873693	1.1173	NA	NA	NA	0.93752	1
BCAC_OncoArray	5alpha-androstan-3beta,17beta-diol disulfate levels	Inverse variance weighted	23	0.0589281	0.0193421	0.00231431	0.0210175	0.0968387	1.0607	1.02124	1.10168	0.0013095	0.285056	TRUE	0.023414	1
BCAC_OncoArray	5alpha-androstan-3beta,17beta-diol monosulfate (2) levels	Inverse variance weighted	21	0.0475144	0.0123552	0.000120214	0.0232981	0.0717306	1.04866	1.02357	1.07437	0.0175992	0.39736	TRUE	0.00254514	0.114323
BCAC_OncoArray	5alpha-pregnan-3beta,20alpha-diol disulfate levels	Inverse variance weighted	12	-0.0100795	0.0286722	0.725181	-0.0662771	0.046118	0.989971	0.935871	1.0472	NA	NA	NA	0.887863	1
BCAC_OncoArray	5alpha-pregnan-3beta,20alpha-diol monosulfate (2) levels	Inverse variance weighted	11	0.0215799	0.0361133	0.550134	-0.0492023	0.092362	1.02181	0.951989	1.09676	NA	NA	NA	0.783783	1
BCAC_OncoArray	5alpha-pregnan-3beta,20beta-diol monosulfate (1) levels	Inverse variance weighted	33	-0.0190653	0.0144995	0.188545	-0.0474843	0.00935367	0.981115	0.953625	1.0094	NA	NA	NA	0.439724	1
BCAC_OncoArray	5alpha-pregnan-diol disulfate levels	Inverse variance weighted	6	-0.0516606	0.0211301	0.0144898	-0.0930755	-0.0102457	0.949651	0.911125	0.989807	0.529463	0.721095	TRUE	0.0917108	1
BCAC_OncoArray	6-bromotryptophan levels	Inverse variance weighted	15	-0.0271875	0.0160218	0.0897147	-0.0585902	0.00421527	0.973179	0.943093	1.00422	NA	NA	NA	0.28158	1
BCAC_OncoArray	6-hydroxyindole sulfate levels	Wald ratio	rs56113850	0.0855941	0.0773775	0.268645	-0.0660657	0.237254	1.08936	0.936069	1.26776	NA	NA	NA	0.5356	1
BCAC_OncoArray	6-oxopiperidine-2-carboxylate levels	Inverse variance weighted	10	0.0103046	0.0294973	0.726835	-0.0475102	0.0681194	1.01036	0.953601	1.07049	NA	NA	NA	0.887863	1
BCAC_OncoArray	7-alpha-hydroxy-3-oxo-4-cholestenoate (7-hoca) levels	Wald ratio	rs4738684	-0.118307	0.0752737	0.116022	-0.265844	0.0292295	0.888423	0.766559	1.02966	NA	NA	NA	0.333943	1
BCAC_OncoArray	7-methylguanine levels	Wald ratio	rs111927943	0.215854	0.075109	0.00405462	0.0686407	0.363068	1.24092	1.07105	1.43773	NA	NA	TRUE	0.0341234	1
BCAC_OncoArray	7-methylxanthine levels	Inverse variance weighted	5	0.153772	0.0399221	0.000117256	0.0755243	0.232019	1.16622	1.07845	1.26114	0.450387	0.765306	TRUE	0.00254514	0.11151
BCAC_OncoArray	8-methoxykynurenate levels	Inverse variance weighted	4	0.0141968	0.041112	0.729854	-0.0663828	0.0947764	1.0143	0.935773	1.09941	NA	NA	NA	0.887863	1
BCAC_OncoArray	9-hydroxystearate levels	Wald ratio	rs603424	-0.00516062	0.0874456	0.95294	-0.176554	0.166233	0.994853	0.838153	1.18085	NA	NA	NA	0.968212	1
BCAC_OncoArray	Acetylcarnitine (C2) to propionylcarnitine (C3) ratio	Inverse variance weighted	3	0.11663	0.0404683	0.00395163	0.0373117	0.195948	1.1237	1.03802	1.21646	0.99201	0.999457	TRUE	0.0338174	1
BCAC_OncoArray	Acetylcarnitine levels (Biocrates platform)	Inverse variance weighted	5	0.026142	0.0524475	0.618173	-0.076655	0.128939	1.02649	0.926209	1.13762	NA	NA	NA	0.821278	1
BCAC_OncoArray	Acisoga levels	Inverse variance weighted	17	0.0309115	0.0156251	0.0478927	0.000286246	0.0615368	1.03139	1.00029	1.06347	0.584341	0.95788	TRUE	0.183653	1
BCAC_OncoArray	Aconitate [cis or trans] levels	Wald ratio	rs807666	-0.0375914	0.0939612	0.689102	-0.221755	0.146573	0.963106	0.801111	1.15786	NA	NA	NA	0.867995	1
BCAC_OncoArray	Adenosine 3',5'-cyclic monophosphate (camp) levels	Inverse variance weighted	7	0.0633203	0.0415473	0.127496	-0.0181125	0.144753	1.06537	0.982051	1.15575	NA	NA	NA	0.351445	1
BCAC_OncoArray	Adenosine 5'-diphosphate (ADP) to 5-oxoproline ratio	Wald ratio	rs3935209	0.0563629	0.061306	0.357902	-0.0637968	0.176523	1.05798	0.938196	1.19306	NA	NA	NA	0.602449	1
BCAC_OncoArray	Adenosine 5'-diphosphate (ADP) to creatine ratio	Wald ratio	rs1047891	-0.0563445	0.0626886	0.368759	-0.179214	0.0665252	0.945213	0.835927	1.06879	NA	NA	NA	0.608842	1
BCAC_OncoArray	Adenosine 5'-diphosphate (ADP) to flavin adenine dinucleotide (FAD) ratio	Wald ratio	rs2706762	0.0725995	0.0612912	0.236215	-0.0475313	0.19273	1.0753	0.953581	1.21256	NA	NA	NA	0.509548	1
BCAC_OncoArray	Adenosine 5'-diphosphate (ADP) to glycerate ratio	Wald ratio	rs74802261	-0.0230527	0.0815588	0.777444	-0.182908	0.136803	0.977211	0.832845	1.1466	NA	NA	NA	0.910671	1
BCAC_OncoArray	Adenosine 5'-diphosphate (ADP) to glycine ratio	Inverse variance weighted	2	-0.0360553	0.0277548	0.193921	-0.0904546	0.0183441	0.964587	0.913516	1.01851	NA	NA	NA	0.446535	1
BCAC_OncoArray	Adenosine 5'-diphosphate (ADP) to N-acetylneuraminate ratio	Inverse variance weighted	2	-0.0584548	0.0473214	0.21673	-0.151205	0.0342952	0.943221	0.859672	1.03489	NA	NA	NA	0.484964	1
BCAC_OncoArray	Adenosine 5'-diphosphate (ADP) to phosphoethanolamine ratio	Wald ratio	rs112036394	-0.00943678	0.0706558	0.893751	-0.147922	0.129049	0.990608	0.862498	1.13775	NA	NA	NA	0.93752	1
BCAC_OncoArray	Adenosine 5'-monophosphate (AMP) to asparagine ratio	Inverse variance weighted	2	0.0755365	0.0580111	0.192881	-0.0381653	0.189238	1.07846	0.962554	1.20833	NA	NA	NA	0.446535	1
BCAC_OncoArray	Adenosine 5'-monophosphate (AMP) to aspartate ratio	Wald ratio	rs1354034	-0.0100411	0.0754608	0.894143	-0.157944	0.137862	0.990009	0.853897	1.14782	NA	NA	NA	0.93752	1
BCAC_OncoArray	Adenosine 5'-monophosphate (AMP) to flavin adenine dinucleotide (FAD) ratio	Inverse variance weighted	7	0.0498378	0.0234303	0.0334143	0.00391447	0.0957611	1.0511	1.00392	1.1005	0.653595	0.938706	TRUE	0.149188	1
BCAC_OncoArray	Adenosine 5'-monophosphate (AMP) to glycine ratio	Inverse variance weighted	6	-0.0400515	0.0202328	0.0477565	-0.0797078	-0.000395129	0.96074	0.923386	0.999605	0.964749	0.510118	TRUE	0.183653	1
BCAC_OncoArray	Adenosine 5'-monophosphate (AMP) to inosine 5'-monophosphate (IMP) ratio	Wald ratio	rs1354034	-0.00799379	0.060075	0.894143	-0.125741	0.109753	0.992038	0.881843	1.116	NA	NA	NA	0.93752	1
BCAC_OncoArray	Adenosine 5'-monophosphate (AMP) to proline ratio	Wald ratio	rs2540644	0.0108504	0.0638242	0.865007	-0.114245	0.135946	1.01091	0.892039	1.14562	NA	NA	NA	0.93752	1
BCAC_OncoArray	Adenosine 5'-monophosphate (AMP) to serine ratio	Inverse variance weighted	2	-0.0105165	0.0712651	0.882683	-0.150196	0.129163	0.989539	0.860539	1.13788	NA	NA	NA	0.93752	1
BCAC_OncoArray	Adenosine 5'-monophosphate (AMP) to urate ratio	Inverse variance weighted	5	-0.0504907	0.0393348	0.199278	-0.127587	0.0266056	0.950763	0.880217	1.02696	NA	NA	NA	0.455561	1
BCAC_OncoArray	Adipoylcarnitine (C6-DC) levels	Inverse variance weighted	12	-0.0290489	0.0249453	0.244219	-0.0779417	0.0198439	0.971369	0.925018	1.02004	NA	NA	NA	0.51157	1
BCAC_OncoArray	Adrenate (22:4n6) levels	Wald ratio	rs174471	-0.183152	0.0836507	0.0285619	-0.347107	-0.0191962	0.832642	0.70673	0.980987	NA	NA	TRUE	0.139346	1
BCAC_OncoArray	Alanine to asparagine ratio	Inverse variance weighted	18	0.0294046	0.0150454	0.0506544	-8.43148e-05	0.0588935	1.02984	0.999916	1.06066	NA	NA	NA	0.19116	1
BCAC_OncoArray	Alliin levels	Inverse variance weighted	13	-0.00541598	0.0102918	0.598721	-0.025588	0.014756	0.994599	0.974737	1.01487	NA	NA	NA	0.813713	1
BCAC_OncoArray	Alpha-hydroxyisovalerate levels	Inverse variance weighted	10	-0.0163399	0.0250446	0.514122	-0.0654272	0.0327474	0.983793	0.936667	1.03329	NA	NA	NA	0.754522	1
BCAC_OncoArray	Alpha-ketobutyrate to 3-methyl-2-oxobutyrate ratio	Wald ratio	rs10014755	-0.0964213	0.0656509	0.141915	-0.225097	0.0322546	0.908081	0.798439	1.03278	NA	NA	NA	0.373597	1
BCAC_OncoArray	Alpha-ketobutyrate to 3-methyl-2-oxovalerate ratio	Wald ratio	rs7661312	-0.0630189	0.0774782	0.416003	-0.214876	0.0888385	0.938926	0.806641	1.0929	NA	NA	NA	0.652836	1
BCAC_OncoArray	Alpha-ketobutyrate to 4-methyl-2-oxopentanoate ratio	Wald ratio	rs7661312	-0.055854	0.0686695	0.416003	-0.190446	0.0787381	0.945677	0.82659	1.08192	NA	NA	NA	0.652836	1
BCAC_OncoArray	Alpha-ketoglutaramate levels	Inverse variance weighted	4	-0.0836908	0.0278246	0.0026315	-0.138227	-0.0291545	0.919716	0.870901	0.971266	0.667723	0.653119	TRUE	0.0250748	1
BCAC_OncoArray	Alpha-ketoglutarate levels	Inverse variance weighted	3	0.0544247	0.0376423	0.148223	-0.0193543	0.128204	1.05593	0.980832	1.13678	NA	NA	NA	0.379553	1
BCAC_OncoArray	Alpha-ketoglutarate to alanine ratio	Wald ratio	rs6124830	0.0556463	0.066334	0.401536	-0.0743683	0.185661	1.05722	0.92833	1.20401	NA	NA	NA	0.636435	1
BCAC_OncoArray	Alpha-ketoglutarate to aspartate ratio	Inverse variance weighted	2	-0.000302051	0.0452818	0.994678	-0.0890544	0.0884503	0.999698	0.914796	1.09248	NA	NA	NA	0.996774	1
BCAC_OncoArray	Alpha-ketoglutarate to kynurenine ratio	Inverse variance weighted	3	-0.00781037	0.0437642	0.858358	-0.0935882	0.0779675	0.99222	0.910658	1.08109	NA	NA	NA	0.93752	1
BCAC_OncoArray	Alpha-ketoglutarate to ornithine ratio	Wald ratio	rs6124830	0.0637302	0.0759705	0.401536	-0.085172	0.212632	1.0658	0.918354	1.23693	NA	NA	NA	0.636435	1
BCAC_OncoArray	Alpha-ketoglutarate to proline ratio	Inverse variance weighted	10	0.0557111	0.0246947	0.0240712	0.00730943	0.104113	1.05729	1.00734	1.10973	0.669351	0.42546	TRUE	0.124827	1
BCAC_OncoArray	Alpha-ketoglutarate to pyruvate ratio	Inverse variance weighted	3	0.091314	0.0445278	0.0402944	0.00403947	0.178589	1.09561	1.00405	1.19553	0.510448	0.719852	TRUE	0.164406	1
BCAC_OncoArray	Alpha-ketoglutarate to succinate ratio	Wald ratio	rs75459113	-0.118277	0.0891803	0.18475	-0.293071	0.0565161	0.88845	0.745969	1.05814	NA	NA	NA	0.432751	1
BCAC_OncoArray	Alpha-tocopherol levels	Inverse variance weighted	3	0.0177144	0.052558	0.736083	-0.0852993	0.120728	1.01787	0.918237	1.12832	NA	NA	NA	0.887863	1
BCAC_OncoArray	Andro steroid monosulfate C19H28O6S (1) levels	Inverse variance weighted	38	-0.0817226	0.0194265	2.59056e-05	-0.119799	-0.0436467	0.921528	0.887099	0.957292	5.66896e-17	0.134389	TRUE	0.000849526	0.0246363
BCAC_OncoArray	Androstenediol (3alpha, 17alpha) monosulfate (3) levels	Inverse variance weighted	40	0.0203657	0.00956191	0.0331813	0.0016244	0.0391071	1.02057	1.00163	1.03988	0.326591	0.0134728	TRUE	0.148846	1
BCAC_OncoArray	Androstenediol (3beta,17beta) disulfate (1) levels	Inverse variance weighted	9	-0.00806574	0.0288762	0.779998	-0.0646631	0.0485316	0.991967	0.937383	1.04973	NA	NA	NA	0.911881	1
BCAC_OncoArray	Androstenediol (3beta,17beta) disulfate (2) levels	Inverse variance weighted	6	-0.0594429	0.0625558	0.341991	-0.182052	0.0631665	0.942289	0.833558	1.0652	NA	NA	NA	0.588126	1
BCAC_OncoArray	Androstenediol (3beta,17beta) monosulfate (1) levels	Inverse variance weighted	5	0.110166	0.031665	0.000503078	0.0481026	0.172229	1.11646	1.04928	1.18795	0.917441	0.429315	TRUE	0.0072046	0.478427
BCAC_OncoArray	Androstenediol (3beta,17beta) monosulfate (2) levels	Inverse variance weighted	7	0.0897434	0.0296006	0.00243089	0.0317263	0.14776	1.09389	1.03223	1.15924	0.607014	0.259391	TRUE	0.0243344	1
BCAC_OncoArray	Androsterone glucuronide levels	Inverse variance weighted	46	0.0201227	0.00878573	0.0219989	0.00290269	0.0373427	1.02033	1.00291	1.03805	0.000137894	0.791736	TRUE	0.116877	1
BCAC_OncoArray	Androsterone glucuronide to etiocholanolone glucuronide ratio	Inverse variance weighted	78	0.03699	0.00740208	5.81566e-07	0.0224819	0.0514981	1.03768	1.02274	1.05285	0.0160088	3.13389e-05	TRUE	3.45669e-05	0.00055307
BCAC_OncoArray	Androsterone sulfate levels	Inverse variance weighted	39	0.0256985	0.00806578	0.00144196	0.00988959	0.0415075	1.02603	1.00994	1.04238	0.00235372	0.947768	TRUE	0.0182841	1
BCAC_OncoArray	Arabitol_xylitol levels	Wald ratio	rs72861763	-0.0767997	0.0787342	0.329347	-0.231119	0.0775193	0.926075	0.793645	1.0806	NA	NA	NA	0.574695	1
BCAC_OncoArray	Arabonate_xylonate levels	Inverse variance weighted	2	-0.0927102	0.0644637	0.150384	-0.219059	0.0336386	0.911458	0.803274	1.03421	NA	NA	NA	0.383418	1
BCAC_OncoArray	Arachidonate (20:4n6) levels	Inverse variance weighted	11	-0.0255236	0.0216859	0.239207	-0.0680279	0.0169807	0.974799	0.934234	1.01713	NA	NA	NA	0.509548	1
BCAC_OncoArray	Arachidonate (20:4n6) to caffeine ratio	Wald ratio	rs174566	0.100265	0.0864938	0.246366	-0.0692623	0.269793	1.10546	0.933082	1.30969	NA	NA	NA	0.514932	1
BCAC_OncoArray	Arachidonate (20:4n6) to linoleate (18:2n6) ratio	Inverse variance weighted	14	0.0118154	0.0170787	0.489049	-0.0216588	0.0452896	1.01189	0.978574	1.04633	NA	NA	NA	0.728643	1
BCAC_OncoArray	Arachidonate (20:4n6) to oleate to vaccenate (18:1) ratio	Inverse variance weighted	17	0.00472485	0.0147669	0.748997	-0.0242183	0.033668	1.00474	0.976073	1.03424	NA	NA	NA	0.893722	1
BCAC_OncoArray	Arachidonate (20:4n6) to paraxanthine ratio	Inverse variance weighted	2	0.0157962	0.0652963	0.808846	-0.112184	0.143777	1.01592	0.893879	1.15463	NA	NA	NA	0.919379	1
BCAC_OncoArray	Arachidonate (20:4n6) to pyruvate ratio	Inverse variance weighted	6	0.0256215	0.0242831	0.291372	-0.0219734	0.0732164	1.02595	0.978266	1.07596	NA	NA	NA	0.550884	1
BCAC_OncoArray	Arachidonoylcarnitine (C20:4) levels	Inverse variance weighted	49	0.0119861	0.0118655	0.312419	-0.0112704	0.0352425	1.01206	0.988793	1.03587	NA	NA	NA	0.568138	1
BCAC_OncoArray	Arachidonoylcholine levels	Inverse variance weighted	2	0.0451403	0.0396692	0.255154	-0.0326113	0.122892	1.04617	0.967915	1.13076	NA	NA	NA	0.527883	1
BCAC_OncoArray	Arachidoylcarnitine (C20) levels	Inverse variance weighted	9	-0.0486972	0.0386875	0.208126	-0.124525	0.0271302	0.952469	0.882916	1.0275	NA	NA	NA	0.469423	1
BCAC_OncoArray	Argininate levels	Inverse variance weighted	10	0.0355429	0.0228889	0.12046	-0.00931928	0.0804051	1.03618	0.990724	1.08373	NA	NA	NA	0.339932	1
BCAC_OncoArray	Arginine levels	Inverse variance weighted	3	0.028226	0.0649909	0.664066	-0.0991562	0.155608	1.02863	0.905601	1.16837	NA	NA	NA	0.855727	1
BCAC_OncoArray	Arginine to citrulline ratio	Inverse variance weighted	3	-0.0523099	0.0470813	0.266544	-0.144589	0.0399694	0.949035	0.865378	1.04078	NA	NA	NA	0.5356	1
BCAC_OncoArray	Arginine to glutamate ratio	Wald ratio	rs62354638	-0.0951281	0.09707	0.327088	-0.285385	0.095129	0.909256	0.751725	1.0998	NA	NA	NA	0.574017	1
BCAC_OncoArray	Arginine to ornithine ratio	Inverse variance weighted	6	-0.0685751	0.0316126	0.0300651	-0.130536	-0.00661438	0.933723	0.877625	0.993407	0.184558	0.84145	TRUE	0.142056	1
BCAC_OncoArray	Arginine to phosphate ratio	Inverse variance weighted	3	0.0271809	0.0711371	0.702393	-0.112248	0.16661	1.02755	0.893823	1.18129	NA	NA	NA	0.877761	1
BCAC_OncoArray	Ascorbic acid 2-sulfate levels	Inverse variance weighted	10	0.0473358	0.0276312	0.0866891	-0.00682139	0.101493	1.04847	0.993202	1.10682	NA	NA	NA	0.276572	1
BCAC_OncoArray	Ascorbic acid 3-sulfate levels	Inverse variance weighted	2	0.0732824	0.0684919	0.284646	-0.0609618	0.207527	1.07603	0.940859	1.23063	NA	NA	NA	0.544698	1
BCAC_OncoArray	Aspartate levels	Inverse variance weighted	3	0.0429432	0.0403334	0.287009	-0.0361103	0.121997	1.04388	0.964534	1.12975	NA	NA	NA	0.545162	1
BCAC_OncoArray	Aspartate to asparagine ratio	Inverse variance weighted	6	0.0444632	0.0265354	0.0938134	-0.00754626	0.0964727	1.04547	0.992482	1.10128	NA	NA	NA	0.290608	1
BCAC_OncoArray	Aspartate to citrate ratio	Wald ratio	rs1354034	0.00783715	0.0588978	0.894143	-0.107603	0.123277	1.00787	0.897984	1.1312	NA	NA	NA	0.93752	1
BCAC_OncoArray	Aspartate to citrulline ratio	Wald ratio	rs1354034	0.00733579	0.0551301	0.894143	-0.100719	0.115391	1.00736	0.904187	1.12231	NA	NA	NA	0.93752	1
BCAC_OncoArray	Aspartate to glutamate ratio	Inverse variance weighted	2	0.0228121	0.0529029	0.666318	-0.0808776	0.126502	1.02307	0.922307	1.13485	NA	NA	NA	0.857413	1
BCAC_OncoArray	Aspartate to mannose ratio	Inverse variance weighted	5	-0.0526485	0.0240648	0.0286853	-0.0998155	-0.00548158	0.948713	0.905004	0.994533	0.837396	0.382245	TRUE	0.139346	1
BCAC_OncoArray	Aspartate to N-acetylglucosamine to N-acetylgalactosamine ratio	Inverse variance weighted	4	0.00271731	0.0306732	0.929408	-0.0574022	0.0628368	1.00272	0.944214	1.06485	NA	NA	NA	0.956567	1
BCAC_OncoArray	Aspartate to phosphate ratio	Wald ratio	rs1354034	0.00735118	0.0552457	0.894143	-0.10093	0.115633	1.00738	0.903996	1.12258	NA	NA	NA	0.93752	1
BCAC_OncoArray	Behenoyl dihydrosphingomyelin (d18:0_22:0) levels	Inverse variance weighted	3	-0.103404	0.0851974	0.224865	-0.270391	0.0635834	0.901763	0.763081	1.06565	NA	NA	NA	0.497317	1
BCAC_OncoArray	Behenoyl sphingomyelin (d18:1_22:0) levels	Wald ratio	rs10713262	-0.122491	0.0921187	0.183615	-0.303044	0.0580619	0.884714	0.738567	1.05978	NA	NA	NA	0.432223	1
BCAC_OncoArray	Behenoylcarnitine (C22) levels	Inverse variance weighted	7	-0.00830918	0.0242758	0.732138	-0.0558897	0.0392713	0.991725	0.945643	1.04005	NA	NA	NA	0.887863	1
BCAC_OncoArray	Benzoate to linoleoyl-arachidonoyl-glycerol (18:2 to 20:4) [1] ratio	Inverse variance weighted	4	-0.0153792	0.0277505	0.579444	-0.0697702	0.0390117	0.984738	0.932608	1.03978	NA	NA	NA	0.79747	1
BCAC_OncoArray	Benzoate to linoleoyl-arachidonoyl-glycerol (18:2 to 20:4) [2] ratio	Inverse variance weighted	6	-0.0250356	0.028478	0.379336	-0.0808524	0.0307812	0.975275	0.92233	1.03126	NA	NA	NA	0.620711	1
BCAC_OncoArray	Benzoate to oleoyl-linoleoyl-glycerol (18:1 to 18:2) [2] ratio	Inverse variance weighted	3	0.109456	0.0663674	0.0990992	-0.0206246	0.239536	1.11567	0.979587	1.27066	NA	NA	NA	0.300138	1
BCAC_OncoArray	Beta-alanine levels	Inverse variance weighted	3	-0.032036	0.0326166	0.326002	-0.0959644	0.0318925	0.968472	0.908496	1.03241	NA	NA	NA	0.574017	1
BCAC_OncoArray	Beta-citrylglutamate levels	Inverse variance weighted	53	0.0103567	0.00716573	0.14837	-0.00368812	0.0244015	1.01041	0.996319	1.0247	NA	NA	NA	0.379553	1
BCAC_OncoArray	Beta-hydroxyisovalerate levels	Inverse variance weighted	7	-0.0770424	0.029709	0.00950778	-0.135272	-0.0188128	0.925851	0.873478	0.981363	0.4883	0.57695	TRUE	0.0684992	1
BCAC_OncoArray	Beta-hydroxyisovaleroylcarnitine levels	Inverse variance weighted	12	-0.0430812	0.0176339	0.0145619	-0.0776436	-0.00851886	0.957834	0.925294	0.991517	0.53255	0.238805	TRUE	0.0917108	1
BCAC_OncoArray	Betaine levels	Inverse variance weighted	18	0.00757305	0.0235563	0.747842	-0.0385974	0.0537435	1.0076	0.962138	1.05521	NA	NA	NA	0.893464	1
BCAC_OncoArray	Bilirubin (E,E) levels	Inverse variance weighted	37	0.00571858	0.0110384	0.604416	-0.0159167	0.0273539	1.00573	0.984209	1.02773	NA	NA	NA	0.817334	1
BCAC_OncoArray	Bilirubin (E,Z or Z,E) levels	Inverse variance weighted	43	0.000265158	0.00777771	0.972804	-0.0149791	0.0155095	1.00027	0.985132	1.01563	NA	NA	NA	0.981057	1
BCAC_OncoArray	Bilirubin (z,z) levels	Inverse variance weighted	45	0.00444081	0.00759496	0.558746	-0.0104453	0.0193269	1.00445	0.989609	1.01951	NA	NA	NA	0.784886	1
BCAC_OncoArray	Bilirubin (Z,Z) to androsterone glucuronide ratio	Inverse variance weighted	45	-0.0224913	0.0101063	0.0260498	-0.0422996	-0.00268291	0.97776	0.958583	0.997321	2.14497e-05	0.502797	TRUE	0.131502	1
BCAC_OncoArray	Bilirubin (Z,Z) to etiocholanolone glucuronide ratio	Inverse variance weighted	37	0.00280287	0.0137356	0.838307	-0.0241189	0.0297246	1.00281	0.97617	1.03017	NA	NA	NA	0.934619	1
BCAC_OncoArray	Bilirubin (Z,Z) to glucuronate ratio	Inverse variance weighted	20	0.00390676	0.0150714	0.795468	-0.0256331	0.0334467	1.00391	0.974693	1.03401	NA	NA	NA	0.917463	1
BCAC_OncoArray	Bilirubin (Z,Z) to taurocholate ratio	Inverse variance weighted	2	-0.035381	0.0573256	0.537107	-0.147739	0.0769772	0.965238	0.862656	1.08002	NA	NA	NA	0.773923	1
BCAC_OncoArray	Bilirubin degradation product, C16H18N2O5 (1) levels	Inverse variance weighted	33	-0.000992812	0.0119439	0.933754	-0.024403	0.0224173	0.999008	0.975892	1.02267	NA	NA	NA	0.957929	1
BCAC_OncoArray	Bilirubin degradation product, C16H18N2O5 (2) levels	Inverse variance weighted	30	0.000789028	0.012297	0.948839	-0.0233131	0.0248912	1.00079	0.976957	1.0252	NA	NA	NA	0.968212	1
BCAC_OncoArray	Bilirubin degradation product, C16H18N2O5 (3) levels	Inverse variance weighted	31	0.00543206	0.0122145	0.65652	-0.0185083	0.0293724	1.00545	0.981662	1.02981	NA	NA	NA	0.851774	1
BCAC_OncoArray	Bilirubin degradation product, C16H18N2O5 (4) levels	Inverse variance weighted	31	0.00300394	0.0123347	0.807591	-0.0211721	0.02718	1.00301	0.97905	1.02755	NA	NA	NA	0.919379	1
BCAC_OncoArray	Bilirubin degradation product, C17H18N2O4 (1) levels	Inverse variance weighted	40	-0.00137205	0.00961131	0.886485	-0.0202102	0.0174661	0.998629	0.979993	1.01762	NA	NA	NA	0.93752	1
BCAC_OncoArray	Bilirubin degradation product, C17H18N2O4 (2) levels	Inverse variance weighted	36	-0.00325675	0.00886931	0.713475	-0.0206406	0.0141271	0.996749	0.979571	1.01423	NA	NA	NA	0.881773	1
BCAC_OncoArray	Bilirubin degradation product, C17H18N2O4 (3) levels	Inverse variance weighted	31	0.00119086	0.0110827	0.914431	-0.0205313	0.022913	1.00119	0.979678	1.02318	NA	NA	NA	0.949371	1
BCAC_OncoArray	Bilirubin degradation product, C17H20N2O5 (1) levels	Inverse variance weighted	19	-0.014236	0.013792	0.301981	-0.0412684	0.0127963	0.985865	0.959572	1.01288	NA	NA	NA	0.566114	1
BCAC_OncoArray	Bilirubin degradation product, C17H20N2O5 (2) levels	Inverse variance weighted	19	-0.00717475	0.0196006	0.714329	-0.0455919	0.0312424	0.992851	0.955432	1.03174	NA	NA	NA	0.881773	1
BCAC_OncoArray	Biliverdin levels	Inverse variance weighted	37	-0.00172697	0.0105196	0.869601	-0.0223455	0.0188915	0.998275	0.977902	1.01907	NA	NA	NA	0.93752	1
BCAC_OncoArray	Branched-chain, straight-chain, or cyclopropyl 12:1 fatty acid levels	Inverse variance weighted	6	0.0311776	0.0307009	0.309855	-0.0289962	0.0913513	1.03167	0.97142	1.09565	NA	NA	NA	0.568138	1
BCAC_OncoArray	Butyrylglycine levels	Inverse variance weighted	7	0.0182023	0.0188896	0.335237	-0.0188212	0.0552259	1.01837	0.981355	1.05678	NA	NA	NA	0.579655	1
BCAC_OncoArray	C-glycosyltryptophan levels	Inverse variance weighted	2	0.0361487	0.0845489	0.668981	-0.129567	0.201865	1.03681	0.878475	1.22368	NA	NA	NA	0.857413	1
BCAC_OncoArray	Caffeic acid sulfate levels	Inverse variance weighted	2	-0.081191	0.242752	0.738032	-0.556985	0.394603	0.922018	0.572934	1.4838	NA	NA	NA	0.887863	1
BCAC_OncoArray	Caffeine to linoleate (18:2n6) ratio	Wald ratio	rs12548231	-0.0366269	0.0910838	0.687594	-0.215151	0.141897	0.964036	0.80642	1.15246	NA	NA	NA	0.867287	1
BCAC_OncoArray	Caffeine to paraxanthine ratio	Inverse variance weighted	11	-0.0693153	0.0231546	0.00275722	-0.114698	-0.0239323	0.933032	0.891635	0.976352	0.243383	0.921424	TRUE	0.025707	1
BCAC_OncoArray	Campesterol levels	Inverse variance weighted	7	-0.00802344	0.0261275	0.758776	-0.0592333	0.0431864	0.992009	0.942487	1.04413	NA	NA	NA	0.903124	1
BCAC_OncoArray	Caprate (10:0) levels	Wald ratio	rs150572890	0.120198	0.103041	0.243406	-0.081761	0.322158	1.12772	0.921492	1.3801	NA	NA	NA	0.51157	1
BCAC_OncoArray	Caproate (6:0) levels	Inverse variance weighted	2	-0.0270037	0.0362799	0.456685	-0.0981123	0.0441049	0.973358	0.906547	1.04509	NA	NA	NA	0.699368	1
BCAC_OncoArray	Caprylate (8:0) levels	Inverse variance weighted	3	-0.0389482	0.0418785	0.352357	-0.12103	0.0431337	0.961801	0.886007	1.04408	NA	NA	NA	0.599448	1
BCAC_OncoArray	Carboxyethyl-gaba levels	Inverse variance weighted	7	-0.0209783	0.0532134	0.693411	-0.125277	0.08332	0.97924	0.882253	1.08689	NA	NA	NA	0.871115	1
BCAC_OncoArray	Carnitine C14 levels	Inverse variance weighted	3	-0.209757	0.0424699	7.85391e-07	-0.292998	-0.126516	0.810781	0.746023	0.88116	0.883768	0.949304	TRUE	4.03371e-05	0.000746907
BCAC_OncoArray	Carnitine C18:2 levels	Inverse variance weighted	13	0.015999	0.039791	0.687628	-0.0619913	0.0939893	1.01613	0.939891	1.09855	NA	NA	NA	0.867287	1
BCAC_OncoArray	Carnitine C4 levels	Inverse variance weighted	8	0.0154071	0.0274511	0.574623	-0.0383971	0.0692113	1.01553	0.962331	1.07166	NA	NA	NA	0.793129	1
BCAC_OncoArray	Carnitine C5:1 levels	Wald ratio	rs7678928	-0.138627	0.0643971	0.0313431	-0.264845	-0.0124086	0.870553	0.767325	0.987668	NA	NA	TRUE	0.142619	1
BCAC_OncoArray	Carnitine levels	Inverse variance weighted	24	0.0203396	0.0182393	0.264786	-0.0154095	0.0560887	1.02055	0.984709	1.05769	NA	NA	NA	0.5356	1
BCAC_OncoArray	Carnitine to ergothioneine ratio	Inverse variance weighted	8	-0.0514789	0.0356265	0.148469	-0.121307	0.018349	0.949824	0.885762	1.01852	NA	NA	NA	0.379553	1
BCAC_OncoArray	Carnitine to palmitoylcarnitine (C16) ratio	Inverse variance weighted	2	-0.022648	0.0615856	0.713061	-0.143356	0.0980597	0.977607	0.866446	1.10303	NA	NA	NA	0.881773	1
BCAC_OncoArray	Carnitine to propionylcarnitine (C3) ratio	Inverse variance weighted	11	0.0600053	0.0271854	0.027296	0.00672183	0.113289	1.06184	1.00674	1.11996	0.0790627	0.803918	TRUE	0.1352	1
BCAC_OncoArray	Carotene diol (1) levels	Inverse variance weighted	3	0.024481	0.0281103	0.383813	-0.0306151	0.0795771	1.02478	0.969849	1.08283	NA	NA	NA	0.620759	1
BCAC_OncoArray	Carotene diol (2) levels	Wald ratio	rs12927647	0.0173871	0.0347908	0.617243	-0.0508029	0.0855771	1.01754	0.950466	1.08935	NA	NA	NA	0.821278	1
BCAC_OncoArray	Carotene diol (3) levels	Wald ratio	rs12927647	0.0192854	0.0385892	0.617243	-0.0563494	0.0949202	1.01947	0.945209	1.09957	NA	NA	NA	0.821278	1
BCAC_OncoArray	Catechol sulfate levels	Wald ratio	rs143550070	-0.0597314	0.107519	0.578525	-0.270469	0.151007	0.942017	0.763021	1.163	NA	NA	NA	0.797358	1
BCAC_OncoArray	Ceramide (d18:1_14:0, d16:1_16:0) levels	Inverse variance weighted	6	0.113135	0.0250115	6.088e-06	0.0641123	0.162158	1.11978	1.06621	1.17605	0.994019	0.923657	TRUE	0.000231587	0.00578969
BCAC_OncoArray	Ceramide (d18:1_17:0, d17:1_18:0) levels	Inverse variance weighted	2	0.142737	0.0508661	0.00501392	0.0430397	0.242435	1.15343	1.04398	1.27435	0.881976	NA	TRUE	0.0411055	1
BCAC_OncoArray	Ceramide (d18:1_24:1) levels	Inverse variance weighted	14	0.0336353	0.0159462	0.0349188	0.00238075	0.0648899	1.03421	1.00238	1.06704	0.880928	0.642967	TRUE	0.153431	1
BCAC_OncoArray	Cerotoylcarnitine (C26) levels	Inverse variance weighted	26	-0.0251906	0.0169785	0.137894	-0.0584684	0.0080872	0.975124	0.943208	1.00812	NA	NA	NA	0.367331	1
BCAC_OncoArray	Cholate levels	Wald ratio	rs11076828	0.0234687	0.0882518	0.790294	-0.149505	0.196442	1.02375	0.861134	1.21706	NA	NA	NA	0.915495	1
BCAC_OncoArray	Cholate to bilirubin (Z,Z) ratio	Inverse variance weighted	2	0.0169317	0.0288785	0.557668	-0.0396701	0.0735335	1.01708	0.961106	1.0763	NA	NA	NA	0.784529	1
BCAC_OncoArray	Cholesterol levels	Wald ratio	rs1168041	0.0507035	0.0932187	0.586496	-0.132005	0.233412	1.05201	0.876337	1.2629	NA	NA	NA	0.803686	1
BCAC_OncoArray	Cholesterol to cortisol ratio	Wald ratio	rs9989237	0.0524059	0.0775996	0.499461	-0.0996892	0.204501	1.0538	0.905119	1.22691	NA	NA	NA	0.738705	1
BCAC_OncoArray	Cholesterol to linoleoyl-arachidonoyl-glycerol (18:2 to 20:4) [1] ratio	Inverse variance weighted	6	0.0260385	0.0379094	0.49217	-0.0482639	0.100341	1.02638	0.952882	1.10555	NA	NA	NA	0.731334	1
BCAC_OncoArray	Cholesterol to linoleoyl-arachidonoyl-glycerol (18:2 to 20:4) [2] ratio	Inverse variance weighted	5	0.0204396	0.0397317	0.606944	-0.0574345	0.0983137	1.02065	0.944184	1.10331	NA	NA	NA	0.817334	1
BCAC_OncoArray	Cholesterol to oleoyl-linoleoyl-glycerol (18:1 to 18:2) [2] ratio	Inverse variance weighted	8	0.113547	0.0309978	0.000249225	0.052791	0.174303	1.12024	1.05421	1.19042	0.979517	0.571844	TRUE	0.00452058	0.237013
BCAC_OncoArray	Cholic acid glucuronide levels	Inverse variance weighted	3	-0.0403352	0.0399636	0.312832	-0.118664	0.0379935	0.960467	0.888106	1.03872	NA	NA	NA	0.568138	1
BCAC_OncoArray	Choline levels	Inverse variance weighted	3	-0.0304996	0.0834816	0.714853	-0.194124	0.133124	0.969961	0.823556	1.14239	NA	NA	NA	0.881773	1
BCAC_OncoArray	Choline phosphate to choline ratio	Inverse variance weighted	2	0.0437989	0.0545961	0.422417	-0.0632094	0.150807	1.04477	0.938747	1.16277	NA	NA	NA	0.658554	1
BCAC_OncoArray	Choline phosphate to phosphoethanolamine ratio	Inverse variance weighted	2	0.0195278	0.158503	0.901948	-0.291139	0.330194	1.01972	0.747412	1.39124	NA	NA	NA	0.940518	1
BCAC_OncoArray	Choline to taurocholate ratio	Inverse variance weighted	3	-0.0489091	0.0599904	0.414911	-0.16649	0.0686722	0.952268	0.846631	1.07108	NA	NA	NA	0.652836	1
BCAC_OncoArray	Cinnamoylglycine levels	Inverse variance weighted	3	0.0348651	0.0320829	0.277161	-0.0280174	0.0977476	1.03548	0.972371	1.10268	NA	NA	NA	0.538379	1
BCAC_OncoArray	Cis-3,4-methyleneheptanoylcarnitine levels	Inverse variance weighted	14	0.0385532	0.0189534	0.041941	0.00140455	0.0757018	1.03931	1.00141	1.07864	0.552156	0.169503	TRUE	0.166886	1
BCAC_OncoArray	Cis-3,4-methyleneheptanoylglycine levels	Inverse variance weighted	19	0.0100273	0.0130125	0.440952	-0.0154772	0.0355318	1.01008	0.984642	1.03617	NA	NA	NA	0.681862	1
BCAC_OncoArray	Cis-4-decenoate (10:1n6) levels	Inverse variance weighted	40	-0.0188116	0.00804791	0.0194156	-0.0345855	-0.00303771	0.981364	0.966006	0.996967	0.636084	0.544309	TRUE	0.109906	1
BCAC_OncoArray	Cis-4-decenoylcarnitine (C10:1) levels	Inverse variance weighted	34	-0.0194363	0.00926435	0.0359081	-0.0375944	-0.00127818	0.980751	0.963103	0.998723	0.99876	0.277562	TRUE	0.155221	1
BCAC_OncoArray	Cis 3,4-methyleneheptanoate levels	Wald ratio	rs1564348	0.03191	0.0729746	0.661912	-0.11112	0.17494	1.03242	0.894831	1.19118	NA	NA	NA	0.855727	1
BCAC_OncoArray	Citrate levels	Inverse variance weighted	8	0.00137829	0.0295045	0.962741	-0.0564506	0.0592072	1.00138	0.945113	1.061	NA	NA	NA	0.974007	1
BCAC_OncoArray	Citrate to 4-hydroxyphenylpyruvate ratio	Wald ratio	rs807669	-0.0493371	0.0868708	0.570078	-0.219604	0.12093	0.95186	0.802837	1.12855	NA	NA	NA	0.791644	1
BCAC_OncoArray	Citrate to oxalate (ethanedioate) ratio	Inverse variance weighted	3	-0.104144	0.0490235	0.0336385	-0.20023	-0.00805843	0.901095	0.818542	0.991974	0.939508	0.810562	TRUE	0.149487	1
BCAC_OncoArray	Citrate to taurocholate ratio	Wald ratio	rs76149982	-0.14858	0.111077	0.181016	-0.366292	0.0691307	0.861931	0.693301	1.07158	NA	NA	NA	0.429292	1
BCAC_OncoArray	Citrulline levels	Inverse variance weighted	4	-0.0464387	0.0423902	0.273295	-0.129523	0.036646	0.954623	0.878514	1.03733	NA	NA	NA	0.538379	1
BCAC_OncoArray	Citrulline to dimethylarginine (SDMA + ADMA) ratio	Inverse variance weighted	6	-0.0255064	0.0350132	0.46632	-0.0941323	0.0431195	0.974816	0.910162	1.04406	NA	NA	NA	0.710197	1
BCAC_OncoArray	Citrulline to ornithine ratio	Wald ratio	rs17788484	-0.103196	0.075605	0.172274	-0.251382	0.0449901	0.90195	0.777725	1.04602	NA	NA	NA	0.420084	1
BCAC_OncoArray	Citrulline to phosphate ratio	Wald ratio	rs7580046	-0.0197066	0.0820254	0.810137	-0.180476	0.141063	0.980486	0.834872	1.1515	NA	NA	NA	0.919379	1
BCAC_OncoArray	Cortisol levels (plasma)	Wald ratio	rs4491436	-0.0459741	0.0782525	0.556861	-0.199349	0.107401	0.955067	0.819264	1.11338	NA	NA	NA	0.784529	1
BCAC_OncoArray	Cortisol to taurocholate ratio	Wald ratio	rs4731512	0.00482211	0.091857	0.958134	-0.175218	0.184862	1.00483	0.839274	1.20305	NA	NA	NA	0.970378	1
BCAC_OncoArray	Cortolone glucuronide (1) levels	Inverse variance weighted	10	0.0366755	0.0230135	0.111014	-0.00843096	0.0817819	1.03736	0.991604	1.08522	NA	NA	NA	0.323849	1
BCAC_OncoArray	Creatine levels	Inverse variance weighted	4	0.0284535	0.0292649	0.330915	-0.0289058	0.0858127	1.02886	0.971508	1.0896	NA	NA	NA	0.57532	1
BCAC_OncoArray	Creatine to carnitine ratio	Inverse variance weighted	5	0.020706	0.0275206	0.451821	-0.0332343	0.0746463	1.02092	0.967312	1.0775	NA	NA	NA	0.694155	1
BCAC_OncoArray	Creatinine levels	Wald ratio	rs77924615	0.138585	0.103531	0.180705	-0.0643354	0.341505	1.14865	0.93769	1.40706	NA	NA	NA	0.429292	1
BCAC_OncoArray	Cys-gly, oxidized levels	Inverse variance weighted	46	0.0209763	0.00885938	0.0178993	0.00361192	0.0383407	1.0212	1.00362	1.03909	0.0928622	0.751703	TRUE	0.104431	1
BCAC_OncoArray	Cystathionine levels	Inverse variance weighted	2	0.0528783	0.0462678	0.253091	-0.0378066	0.143563	1.0543	0.962899	1.15438	NA	NA	NA	0.526673	1
BCAC_OncoArray	Cysteine-glutathione disulfide levels	Inverse variance weighted	6	0.0115527	0.0224998	0.607629	-0.0325468	0.0556523	1.01162	0.967977	1.05723	NA	NA	NA	0.817334	1
BCAC_OncoArray	Cysteine to 5-oxoproline ratio	Inverse variance weighted	9	0.0180171	0.019598	0.357922	-0.0203951	0.0564293	1.01818	0.979812	1.05805	NA	NA	NA	0.602449	1
BCAC_OncoArray	Cysteinylglycine disulfide levels	Inverse variance weighted	35	0.0257726	0.0119522	0.031059	0.0023464	0.0491989	1.02611	1.00235	1.05043	0.162572	0.242804	TRUE	0.142056	1
BCAC_OncoArray	Cysteinylglycine levels	Inverse variance weighted	16	0.0431978	0.0205148	0.0352309	0.00298889	0.0834068	1.04414	1.00299	1.08698	0.0652502	0.269405	TRUE	0.153691	1
BCAC_OncoArray	Cysteinylglycine to glutamate ratio	Inverse variance weighted	3	0.0325525	0.0434759	0.454009	-0.0526602	0.117765	1.03309	0.948702	1.12498	NA	NA	NA	0.696391	1
BCAC_OncoArray	Cysteinylglycine to taurine ratio	Inverse variance weighted	5	0.046643	0.0466004	0.316868	-0.0446938	0.13798	1.04775	0.95629	1.14795	NA	NA	NA	0.568138	1
BCAC_OncoArray	Cytidine levels	Wald ratio	rs72754978	-0.0936876	0.0704249	0.183413	-0.23172	0.0443452	0.910567	0.793168	1.04534	NA	NA	NA	0.432223	1
BCAC_OncoArray	Cytidine to N-acetylglucosamine to N-acetylgalactosamine ratio	Inverse variance weighted	3	-0.0582242	0.0419486	0.165141	-0.140444	0.0239951	0.943438	0.868973	1.02429	NA	NA	NA	0.410049	1
BCAC_OncoArray	Cytidine to N-acetylneuraminate ratio	Inverse variance weighted	3	-0.0865887	0.0431017	0.0445436	-0.171068	-0.00210934	0.917054	0.842764	0.997893	0.966912	0.940741	TRUE	0.176504	1
BCAC_OncoArray	Decadienedioic acid (C10:2-DC) levels	Inverse variance weighted	86	-5.13026e-07	0.00538415	0.999924	-0.0105534	0.0105524	0.999999	0.989502	1.01061	NA	NA	NA	0.99999	1
BCAC_OncoArray	Decanoylcarnitine (C10) levels	Inverse variance weighted	23	-0.0145507	0.0121056	0.229372	-0.0382777	0.00917633	0.985555	0.962446	1.00922	NA	NA	NA	0.50261	1
BCAC_OncoArray	Delta-CEHC levels	Wald ratio	rs2108622	0.078583	0.0721048	0.275782	-0.0627425	0.219908	1.08175	0.939185	1.24596	NA	NA	NA	0.538379	1
BCAC_OncoArray	Deoxycarnitine levels	Inverse variance weighted	4	0.0219088	0.0320788	0.494627	-0.0409657	0.0847833	1.02215	0.959862	1.08848	NA	NA	NA	0.732695	1
BCAC_OncoArray	Deoxycholate levels	Wald ratio	rs10107182	-0.125533	0.0799168	0.11623	-0.28217	0.0311041	0.882027	0.754146	1.03159	NA	NA	NA	0.333943	1
BCAC_OncoArray	Deoxycholic acid 12-sulfate levels	Inverse variance weighted	6	-0.0350161	0.0190373	0.065865	-0.0723292	0.00229701	0.96559	0.930225	1.0023	NA	NA	NA	0.235024	1
BCAC_OncoArray	Deoxycholic acid glucuronide levels	Inverse variance weighted	59	-0.0422478	0.00850222	6.72872e-07	-0.0589122	-0.0255835	0.958632	0.94279	0.974741	0.971336	0.353146	TRUE	3.76413e-05	0.000639901
BCAC_OncoArray	DHEAS levels	Inverse variance weighted	8	0.0619316	0.0301225	0.0397831	0.00289156	0.120972	1.06389	1.0029	1.12859	0.179692	0.0261684	TRUE	0.164406	1
BCAC_OncoArray	Dihomo-linolenate (20:3n3 or n6) levels	Inverse variance weighted	2	-0.0557204	0.0554523	0.314976	-0.164407	0.052966	0.945804	0.848397	1.05439	NA	NA	NA	0.568138	1
BCAC_OncoArray	Dihomo-linolenoylcarnitine (C20:3n3 or 6) levels	Inverse variance weighted	44	0.0160397	0.0136005	0.238261	-0.0106173	0.0426967	1.01617	0.989439	1.04362	NA	NA	NA	0.509548	1
BCAC_OncoArray	Dihomo-linoleoylcarnitine (C20:2) levels	Inverse variance weighted	11	-0.0102285	0.0330093	0.756663	-0.0749267	0.0544697	0.989824	0.927812	1.05598	NA	NA	NA	0.901737	1
BCAC_OncoArray	Dihydroorotate levels	Inverse variance weighted	20	-0.0166836	0.013809	0.226982	-0.0437492	0.010382	0.983455	0.957194	1.01044	NA	NA	NA	0.499676	1
BCAC_OncoArray	Dimethyl sulfone levels	Inverse variance weighted	2	0.0782701	0.0670475	0.243056	-0.0531431	0.209683	1.08141	0.948244	1.23329	NA	NA	NA	0.51157	1
BCAC_OncoArray	Dimethylarginine (sdma + adma) levels	Inverse variance weighted	4	0.0609594	0.0356775	0.0875213	-0.00896861	0.130887	1.06286	0.991071	1.13984	NA	NA	NA	0.277443	1
BCAC_OncoArray	Dimethylglycine levels	Inverse variance weighted	19	-0.0211884	0.012819	0.0983528	-0.0463137	0.00393681	0.979034	0.954742	1.00394	NA	NA	NA	0.299627	1
BCAC_OncoArray	Docosahexaenoate DHA; 22:6n3 levels	Wald ratio	rs174603	0.00824835	0.0929161	0.929263	-0.173867	0.190364	1.00828	0.840408	1.20969	NA	NA	NA	0.956567	1
BCAC_OncoArray	Docosahexaenoylcarnitine (C22:6) levels	Inverse variance weighted	3	-0.0713565	0.0453646	0.115729	-0.160271	0.0175582	0.93113	0.851913	1.01771	NA	NA	NA	0.333943	1
BCAC_OncoArray	Docosapentaenoate (n6 DPA; 22:5n6) levels	Inverse variance weighted	2	-0.00576893	0.142077	0.967611	-0.28424	0.272702	0.994248	0.752586	1.31351	NA	NA	NA	0.976856	1
BCAC_OncoArray	Docosapentaenoate n3 DPA; 22:5n3 levels	Wald ratio	rs4246215	0.0465418	0.0583315	0.424937	-0.0677879	0.160872	1.04764	0.934459	1.17453	NA	NA	NA	0.660319	1
BCAC_OncoArray	Docosatrienoate (22:3n3) levels	Inverse variance weighted	3	-0.0171378	0.0273065	0.53026	-0.0706586	0.0363829	0.983008	0.93178	1.03705	NA	NA	NA	0.768926	1
BCAC_OncoArray	Docosatrienoate (22:3n6) levels	Wald ratio	rs174533	0.0421803	0.043179	0.328633	-0.0424506	0.126811	1.04308	0.958438	1.1352	NA	NA	NA	0.574504	1
BCAC_OncoArray	Dodecadienoate (12:2) levels	Inverse variance weighted	14	-0.0156656	0.0182544	0.390792	-0.0514442	0.020113	0.984456	0.949857	1.02032	NA	NA	NA	0.626699	1
BCAC_OncoArray	Dodecanedioate levels	Wald ratio	rs4660960	0.0372536	0.0844868	0.659256	-0.12834	0.202848	1.03796	0.879554	1.22489	NA	NA	NA	0.854159	1
BCAC_OncoArray	Dodecenedioate (C12:1-DC) levels	Inverse variance weighted	11	-0.00524449	0.0220471	0.811977	-0.0484568	0.0379678	0.994769	0.952698	1.0387	NA	NA	NA	0.920369	1
BCAC_OncoArray	Dopamine 3-o-sulfate levels	Inverse variance weighted	2	0.0840364	0.0645663	0.19307	-0.0425136	0.210586	1.08767	0.958377	1.2344	NA	NA	NA	0.446535	1
BCAC_OncoArray	Dopamine 4-sulfate levels	Wald ratio	rs145261788	-0.0692595	0.0958994	0.470166	-0.257222	0.118703	0.933085	0.773196	1.12604	NA	NA	NA	0.713799	1
BCAC_OncoArray	Dopamine 4-sulfate to dopamine 3-O-sulfate ratio	Inverse variance weighted	2	0.0590966	0.0586376	0.313537	-0.0558331	0.174026	1.06088	0.945697	1.19009	NA	NA	NA	0.568138	1
BCAC_OncoArray	Eicosanedioate (C20-DC) levels	Wald ratio	rs60953408	-0.0426733	0.0979867	0.663199	-0.234727	0.149381	0.958224	0.790787	1.16111	NA	NA	NA	0.855727	1
BCAC_OncoArray	Eicosapentaenoate (EPA; 20:5n3) levels	Inverse variance weighted	2	-0.117099	0.0706761	0.0975526	-0.255624	0.0214264	0.889497	0.774433	1.02166	NA	NA	NA	0.299627	1
BCAC_OncoArray	Eicosenoylcarnitine (C20:1) levels	Inverse variance weighted	4	-0.0121219	0.0927007	0.895962	-0.193815	0.169571	0.987951	0.82381	1.1848	NA	NA	NA	0.938392	1
BCAC_OncoArray	Epiandrosterone sulfate levels	Inverse variance weighted	30	0.0216821	0.00709234	0.00223476	0.00778113	0.0355831	1.02192	1.00781	1.03622	0.76507	0.2993	TRUE	0.0231007	1
BCAC_OncoArray	Ergothioneine levels	Inverse variance weighted	6	0.0504176	0.0423806	0.234188	-0.0326483	0.133484	1.05171	0.967879	1.1428	NA	NA	NA	0.508477	1
BCAC_OncoArray	Erucate (22:1n9) levels	Inverse variance weighted	2	0.101178	0.0645741	0.117151	-0.0253875	0.227743	1.10647	0.974932	1.25576	NA	NA	NA	0.335239	1
BCAC_OncoArray	Erythritol levels in elite athletes	Inverse variance weighted	7	-0.160154	0.0246182	7.74428e-11	-0.208405	-0.111902	0.852013	0.811878	0.894132	0.908497	0.748049	TRUE	1.22747e-08	7.36481e-08
BCAC_OncoArray	Erythronate levels	Inverse variance weighted	10	0.0342628	0.0364822	0.347646	-0.0372422	0.105768	1.03486	0.963443	1.11156	NA	NA	NA	0.593556	1
BCAC_OncoArray	Ethyl beta-glucopyranoside levels	Inverse variance weighted	8	0.0104931	0.0190772	0.582294	-0.0268981	0.0478844	1.01055	0.97346	1.04905	NA	NA	NA	0.800234	1
BCAC_OncoArray	Ethylmalonate levels	Inverse variance weighted	17	-0.0281467	0.018599	0.130192	-0.0646007	0.0083073	0.972246	0.937442	1.00834	NA	NA	NA	0.355785	1
BCAC_OncoArray	Etiocholanolone glucuronide levels	Inverse variance weighted	38	-0.00469613	0.0121343	0.698746	-0.0284793	0.019087	0.995315	0.971922	1.01927	NA	NA	NA	0.874352	1
BCAC_OncoArray	Eugenol sulfate levels	Inverse variance weighted	3	-0.00287463	0.0501653	0.954304	-0.101199	0.0954493	0.99713	0.903754	1.10015	NA	NA	NA	0.968562	1
BCAC_OncoArray	Ferulic acid 4-sulfate levels	Inverse variance weighted	7	-0.0354317	0.0168063	0.03501	-0.0683721	-0.00249142	0.965189	0.933913	0.997512	0.407906	0.190795	TRUE	0.153431	1
BCAC_OncoArray	Flavin adenine dinucleotide (FAD) levels	Inverse variance weighted	20	-0.0129496	0.0114566	0.258345	-0.0354046	0.00950544	0.987134	0.965215	1.00955	NA	NA	NA	0.53064	1
BCAC_OncoArray	Furaneol sulfate levels	Inverse variance weighted	4	-0.0366995	0.0217029	0.0908383	-0.0792373	0.00583826	0.963966	0.923821	1.00586	NA	NA	NA	0.282479	1
BCAC_OncoArray	Galactonate levels	Inverse variance weighted	9	0.0870803	0.0280937	0.00193755	0.0320167	0.142144	1.09098	1.03253	1.15274	0.482993	0.0426423	TRUE	0.0209388	1
BCAC_OncoArray	Gamma-CEHC glucuronide levels	Inverse variance weighted	2	0.0559218	0.0366545	0.127098	-0.0159211	0.127765	1.05752	0.984205	1.13629	NA	NA	NA	0.351367	1
BCAC_OncoArray	Gamma-CEHC levels	Inverse variance weighted	8	0.0437692	0.0194337	0.0243078	0.00567911	0.0818593	1.04474	1.0057	1.0853	0.912105	0.935922	TRUE	0.124827	1
BCAC_OncoArray	Gamma-glutamyl-2-aminobutyrate levels	Inverse variance weighted	3	0.00299142	0.0534899	0.955402	-0.101849	0.107832	1.003	0.903166	1.11386	NA	NA	NA	0.968643	1
BCAC_OncoArray	Gamma-glutamyl-alpha-lysine levels	Inverse variance weighted	2	-0.0108175	0.0592417	0.855113	-0.126931	0.105296	0.989241	0.880794	1.11104	NA	NA	NA	0.93752	1
BCAC_OncoArray	Gamma-glutamylalanine levels	Inverse variance weighted	2	-0.0120361	0.0666937	0.856785	-0.142756	0.118684	0.988036	0.866966	1.12601	NA	NA	NA	0.93752	1
BCAC_OncoArray	Gamma-glutamylcitrulline levels	Inverse variance weighted	4	-0.0150693	0.0412501	0.714876	-0.0959194	0.0657809	0.985044	0.908537	1.06799	NA	NA	NA	0.881773	1
BCAC_OncoArray	Gamma-glutamylglutamate levels	Inverse variance weighted	3	0.0782307	0.0473665	0.0986153	-0.0146076	0.171069	1.08137	0.985499	1.18657	NA	NA	NA	0.299627	1
BCAC_OncoArray	Gamma-glutamylglutamine levels	Inverse variance weighted	2	0.0382238	0.054637	0.48418	-0.0688648	0.145312	1.03896	0.933453	1.1564	NA	NA	NA	0.723477	1
BCAC_OncoArray	Gamma-glutamylglycine levels	Inverse variance weighted	27	0.0110495	0.0101696	0.277247	-0.00888286	0.0309819	1.01111	0.991156	1.03147	NA	NA	NA	0.538379	1
BCAC_OncoArray	Gamma-glutamylisoleucine levels	Wald ratio	rs4049869	0.0832024	0.0880956	0.344937	-0.0894651	0.25587	1.08676	0.91442	1.29158	NA	NA	NA	0.589991	1
BCAC_OncoArray	Gamma-glutamylthreonine levels	Inverse variance weighted	4	0.0996844	0.0410272	0.0151106	0.0192711	0.180098	1.10482	1.01946	1.19733	0.876859	0.672783	TRUE	0.0945408	1
BCAC_OncoArray	Gamma-glutamyltryptophan levels	Inverse variance weighted	2	0.0786228	0.0574949	0.171476	-0.0340671	0.191313	1.0818	0.966507	1.21084	NA	NA	NA	0.420084	1
BCAC_OncoArray	Gamma-glutamyltyrosine levels	Inverse variance weighted	9	0.0669764	0.0263955	0.0111676	0.0152411	0.118712	1.06927	1.01536	1.12605	0.675816	0.411505	TRUE	0.0764053	1
BCAC_OncoArray	Gamma-glutamylvaline levels	Inverse variance weighted	4	-0.0338478	0.0110606	0.00221189	-0.0555266	-0.0121689	0.966719	0.945987	0.987905	0.923915	0.748381	TRUE	0.0231007	1
BCAC_OncoArray	Gluconate levels	Inverse variance weighted	4	0.0397052	0.0385423	0.302929	-0.0358377	0.115248	1.0405	0.964797	1.12215	NA	NA	NA	0.566114	1
BCAC_OncoArray	Glucose-to-mannose ratio	Inverse variance weighted	20	-0.0377143	0.0127299	0.00304989	-0.0626648	-0.0127638	0.962988	0.939258	0.987317	0.846827	0.232663	TRUE	0.0278889	1
BCAC_OncoArray	Glucose to N-palmitoyl-sphinganine (d18:0 to 16:0) ratio	Wald ratio	rs1065853	0.0525769	0.0932705	0.572956	-0.130233	0.235387	1.05398	0.877891	1.2654	NA	NA	NA	0.791979	1
BCAC_OncoArray	Glucose to N-stearoyl-sphingosine (d18:1 to 18:0) ratio	Inverse variance weighted	4	-0.0970475	0.0444652	0.029069	-0.184199	-0.0098957	0.907513	0.83177	0.990153	0.268872	0.844426	TRUE	0.139619	1
BCAC_OncoArray	Glucuronate to androsterone glucuronide ratio	Inverse variance weighted	23	-0.0365055	0.0155251	0.0187039	-0.0669347	-0.00607623	0.964153	0.935256	0.993942	0.00543012	0.346288	TRUE	0.107153	1
BCAC_OncoArray	Glucuronate to etiocholanolone glucuronide ratio	Inverse variance weighted	24	0.0143854	0.0219985	0.51316	-0.0287317	0.0575024	1.01449	0.971677	1.05919	NA	NA	NA	0.754273	1
BCAC_OncoArray	Glucuronide of piperine metabolite C17H21NO3 (3) levels	Wald ratio	rs174695	-0.0505269	0.0466758	0.279027	-0.142011	0.0409577	0.950728	0.867611	1.04181	NA	NA	NA	0.539339	1
BCAC_OncoArray	Glucuronide of piperine metabolite C17H21NO3 (4) levels	Inverse variance weighted	3	0.000823515	0.048649	0.986494	-0.0945284	0.0961755	1.00082	0.909802	1.10095	NA	NA	NA	0.99062	1
BCAC_OncoArray	Glucuronide of piperine metabolite C17H21NO3 (5) levels	Wald ratio	rs174695	-0.0480451	0.0443832	0.279027	-0.135036	0.0389459	0.953091	0.873684	1.03971	NA	NA	NA	0.539339	1
BCAC_OncoArray	Glutamate levels	Wald ratio	rs62354638	0.0834471	0.0851505	0.327088	-0.0834479	0.250342	1.08703	0.919939	1.28446	NA	NA	NA	0.574017	1
BCAC_OncoArray	Glutamate to 5-oxoproline ratio	Inverse variance weighted	4	0.0864164	0.0336705	0.0102722	0.0204221	0.152411	1.09026	1.02063	1.16464	0.64507	0.452391	TRUE	0.0729022	1
BCAC_OncoArray	Glutamate to alanine ratio	Wald ratio	rs62354638	0.0861593	0.0879181	0.327088	-0.0861601	0.258479	1.08998	0.917447	1.29496	NA	NA	NA	0.574017	1
BCAC_OncoArray	Glutamate to cysteine ratio	Inverse variance weighted	2	0.0848776	0.0707777	0.230445	-0.0538466	0.223602	1.08858	0.947577	1.25057	NA	NA	NA	0.5038	1
BCAC_OncoArray	Glutamate to glutamine ratio	Inverse variance weighted	2	0.083376	0.0680851	0.220731	-0.0500707	0.216823	1.08695	0.951162	1.24212	NA	NA	NA	0.489313	1
BCAC_OncoArray	Glutamate to kynurenine ratio	Wald ratio	rs62354638	0.0841587	0.0858766	0.327088	-0.0841595	0.252477	1.0878	0.919285	1.28721	NA	NA	NA	0.574017	1
BCAC_OncoArray	Glutamine conjugate of C6H10O2 (1) levels	Inverse variance weighted	3	0.0115197	0.0398329	0.772428	-0.0665529	0.0895923	1.01159	0.935613	1.09373	NA	NA	NA	0.906888	1
BCAC_OncoArray	Glutamine conjugate of C6H10O2 (2) levels	Inverse variance weighted	3	0.0092533	0.0434618	0.8314	-0.0759319	0.0944385	1.0093	0.926879	1.09904	NA	NA	NA	0.93019	1
BCAC_OncoArray	Glutamine conjugate of C7H12O2 levels	Inverse variance weighted	3	0.0218293	0.0454903	0.631322	-0.0673317	0.11099	1.02207	0.934885	1.11738	NA	NA	NA	0.831561	1
BCAC_OncoArray	Glutamine degradant levels	Inverse variance weighted	13	-0.0124741	0.0233099	0.592552	-0.0581616	0.0332134	0.987603	0.943497	1.03377	NA	NA	NA	0.808993	1
BCAC_OncoArray	Glutamine levels	Inverse variance weighted	2	0.137722	0.0592733	0.0201516	0.0215466	0.253898	1.14766	1.02178	1.28904	0.885394	NA	TRUE	0.112071	1
BCAC_OncoArray	Glutamine to alanine ratio	Inverse variance weighted	2	0.145284	0.0623006	0.0197017	0.0231747	0.267393	1.15637	1.02345	1.30655	0.896101	NA	TRUE	0.110213	1
BCAC_OncoArray	Glutamine to asparagine ratio	Inverse variance weighted	28	0.0252789	0.00992251	0.0108456	0.00583081	0.0447271	1.0256	1.00585	1.04574	0.925781	0.891057	TRUE	0.0747403	1
BCAC_OncoArray	Glutarylcarnitine (c5-dc) levels	Inverse variance weighted	50	0.0147373	0.00919869	0.109133	-0.00329218	0.0327667	1.01485	0.996713	1.03331	NA	NA	NA	0.322314	1
BCAC_OncoArray	Glycerate levels	Inverse variance weighted	3	0.144687	0.0521055	0.0054897	0.0425598	0.246813	1.15568	1.04348	1.27994	0.995556	0.963364	TRUE	0.0442433	1
BCAC_OncoArray	Glycerol 3-phosphate levels	Inverse variance weighted	14	0.021891	0.0204965	0.285505	-0.0182822	0.0620642	1.02213	0.981884	1.06403	NA	NA	NA	0.544698	1
BCAC_OncoArray	Glycerol to carnitine ratio	Inverse variance weighted	2	0.00616974	0.064969	0.924343	-0.121169	0.133509	1.00619	0.885884	1.14283	NA	NA	NA	0.954452	1
BCAC_OncoArray	Glycerol to glycerol 3-phosphate ratio	Inverse variance weighted	2	0.0171693	0.0634376	0.786661	-0.107168	0.141507	1.01732	0.898374	1.15201	NA	NA	NA	0.913492	1
BCAC_OncoArray	Glycerol to palmitoylcarnitine (C16) ratio	Inverse variance weighted	3	0.091224	0.106593	0.392098	-0.117698	0.300146	1.09551	0.888965	1.35006	NA	NA	NA	0.626699	1
BCAC_OncoArray	Glycerophosphoethanolamine levels	Inverse variance weighted	3	-0.0546914	0.103993	0.598948	-0.258517	0.149135	0.946777	0.772196	1.16083	NA	NA	NA	0.813713	1
BCAC_OncoArray	Glycerophosphorylcholine (GPC) levels	Wald ratio	rs77692382	0.220061	0.0750122	0.00334974	0.0730376	0.367085	1.24615	1.07577	1.44352	NA	NA	TRUE	0.0297118	1
BCAC_OncoArray	Glycine conjugate of C10H12O2 levels	Inverse variance weighted	5	-0.0596792	0.0435343	0.170421	-0.145006	0.0256481	0.942067	0.865017	1.02598	NA	NA	NA	0.41987	1
BCAC_OncoArray	Glycine conjugate of C10H14O2 (1) levels	Inverse variance weighted	15	-0.0568958	0.0145497	9.21225e-05	-0.0854132	-0.0283785	0.944692	0.918133	0.97202	0.975621	0.282881	TRUE	0.00224672	0.0876085
BCAC_OncoArray	Glycine levels	Inverse variance weighted	37	0.00934011	0.00824151	0.257088	-0.00681325	0.0254935	1.00938	0.99321	1.02582	NA	NA	NA	0.5292	1
BCAC_OncoArray	Glycine to alanine ratio	Inverse variance weighted	21	0.00886253	0.0108509	0.414069	-0.0124053	0.0301303	1.0089	0.987671	1.03059	NA	NA	NA	0.652836	1
BCAC_OncoArray	Glycine to phosphate ratio	Inverse variance weighted	29	0.0109676	0.00931724	0.239142	-0.00729416	0.0292294	1.01103	0.992732	1.02966	NA	NA	NA	0.509548	1
BCAC_OncoArray	Glycine to pyridoxal ratio	Inverse variance weighted	8	0.0360019	0.0182567	0.0486112	0.000218829	0.071785	1.03666	1.00022	1.07442	0.953275	0.685004	TRUE	0.184917	1
BCAC_OncoArray	Glycine to serine ratio	Inverse variance weighted	25	0.00768567	0.0107059	0.472824	-0.0132979	0.0286692	1.00772	0.98679	1.02908	NA	NA	NA	0.713799	1
BCAC_OncoArray	Glyco-beta-muricholate levels	Inverse variance weighted	18	-0.0336808	0.010639	0.00154672	-0.0545333	-0.0128283	0.96688	0.946927	0.987254	0.958981	0.190663	TRUE	0.0193543	1
BCAC_OncoArray	Glycochenodeoxycholate 3-sulfate levels	Inverse variance weighted	14	-0.0635573	0.027091	0.0189727	-0.116656	-0.0104589	0.93842	0.889892	0.989596	0.0029231	0.275752	TRUE	0.108042	1
BCAC_OncoArray	Glycochenodeoxycholate glucuronide (1) levels	Inverse variance weighted	7	0.00380282	0.0263693	0.885332	-0.047881	0.0554867	1.00381	0.953247	1.05705	NA	NA	NA	0.93752	1
BCAC_OncoArray	Glycocholenate sulfate levels	Inverse variance weighted	21	-0.00427644	0.0110131	0.697792	-0.0258622	0.0173093	0.995733	0.974469	1.01746	NA	NA	NA	0.874308	1
BCAC_OncoArray	Glycodeoxycholate 3-sulfate levels	Inverse variance weighted	8	-0.0339598	0.0226513	0.13381	-0.0783562	0.0104367	0.96661	0.924635	1.01049	NA	NA	NA	0.361516	1
BCAC_OncoArray	Glycohyocholate levels	Inverse variance weighted	5	-0.195551	0.0446934	1.21223e-05	-0.28315	-0.107951	0.822382	0.753407	0.897671	0.261551	0.14234	TRUE	0.000443396	0.0115283
BCAC_OncoArray	Glycolithocholate sulfate levels	Inverse variance weighted	5	-0.0527909	0.0291968	0.07059	-0.110017	0.00443481	0.948578	0.895819	1.00444	NA	NA	NA	0.245004	1
BCAC_OncoArray	Glycolithocholate to glycolithocholate sulfate ratio	Inverse variance weighted	4	0.068739	0.0334758	0.0400347	0.00312633	0.134352	1.07116	1.00313	1.14379	0.46153	0.5219	TRUE	0.164406	1
BCAC_OncoArray	Glycosyl-N-(2-hydroxynervonoyl)-sphingosine (d18:1_24:1(2OH)) levels	Inverse variance weighted	19	-0.0540929	0.0155586	0.000507579	-0.0845878	-0.0235981	0.947344	0.918891	0.976678	0.607676	0.707421	TRUE	0.0072046	0.482708
BCAC_OncoArray	Glycosyl-N-behenoyl-sphingadienine (d18:2_22:0) levels	Inverse variance weighted	15	-0.107994	0.0176819	1.01141e-09	-0.142651	-0.0733375	0.897633	0.867057	0.929287	0.33964	0.606078	TRUE	1.06873e-07	9.61854e-07
BCAC_OncoArray	Glycosyl-N-palmitoyl-sphingosine (d18:1_16:0) levels	Inverse variance weighted	15	-0.0978874	0.0191167	3.0471e-07	-0.135356	-0.0604186	0.906751	0.873405	0.94137	0.19934	0.288376	TRUE	1.93186e-05	0.000289779
BCAC_OncoArray	Glycosyl-N-stearoyl-sphingosine (d18:1_18:0) levels	Inverse variance weighted	11	-0.0896262	0.0325069	0.00583086	-0.15334	-0.0259127	0.914273	0.857838	0.97442	0.00821619	0.365015	TRUE	0.0465979	1
BCAC_OncoArray	Glycosyl-N-tricosanoyl-sphingadienine (d18:2_23:0) levels	Inverse variance weighted	6	-0.103972	0.0435158	0.0168809	-0.189263	-0.018681	0.90125	0.827569	0.981492	0.0085543	0.831737	TRUE	0.101606	1
BCAC_OncoArray	Glycosyl ceramide (d18:1_20:0, d16:1_22:0) levels	Inverse variance weighted	21	-0.0477022	0.027346	0.0810906	-0.1013	0.00589601	0.953418	0.903661	1.00591	NA	NA	NA	0.264242	1
BCAC_OncoArray	Glycosyl ceramide (d18:1_23:1, d17:1_24:1) levels	Inverse variance weighted	4	-0.03758	0.0875731	0.667831	-0.209223	0.134063	0.963117	0.811214	1.14347	NA	NA	NA	0.857413	1
BCAC_OncoArray	Glycosyl ceramide (d18:2_24:1, d18:1_24:2) levels	Inverse variance weighted	13	-0.096553	0.0227545	2.20312e-05	-0.141152	-0.0519541	0.907962	0.868357	0.949372	0.123364	0.407946	TRUE	0.000748274	0.0209517
BCAC_OncoArray	Glycoursodeoxycholic acid sulfate (1) levels	Wald ratio	rs212100	-0.131906	0.0568588	0.0203472	-0.243349	-0.0204625	0.876424	0.783998	0.979745	NA	NA	TRUE	0.112277	1
BCAC_OncoArray	Guanidinoacetate levels	Inverse variance weighted	6	-0.0552858	0.0319985	0.0840306	-0.118003	0.00743122	0.946215	0.888694	1.00746	NA	NA	NA	0.269977	1
BCAC_OncoArray	Gulonate levels	Inverse variance weighted	2	0.146107	0.126405	0.247738	-0.101647	0.393862	1.15732	0.903348	1.4827	NA	NA	NA	0.516664	1
BCAC_OncoArray	Hexadecanedioate (C16-DC) levels	Inverse variance weighted	5	-0.000290306	0.0185222	0.987495	-0.0365938	0.0360132	0.99971	0.964068	1.03667	NA	NA	NA	0.99062	1
BCAC_OncoArray	Hexadecenedioate (C16:1-DC) levels	Wald ratio	rs4149056	-0.00709219	0.0167002	0.671073	-0.0398246	0.0256403	0.992933	0.960958	1.02597	NA	NA	NA	0.857783	1
BCAC_OncoArray	Hexanoylcarnitine levels (Biocrates platform)	Inverse variance weighted	37	-0.0201712	0.00840576	0.0164089	-0.0366465	-0.00369595	0.980031	0.964017	0.996311	0.99743	0.832134	TRUE	0.0993938	1
BCAC_OncoArray	Hexanoylglutamine levels	Inverse variance weighted	42	-0.0680379	0.0137898	8.05894e-07	-0.0950659	-0.0410099	0.934225	0.909313	0.95982	8.09771e-07	2.49753e-06	TRUE	4.03371e-05	0.000766406
BCAC_OncoArray	Hexanoylglycine levels	Inverse variance weighted	19	0.00167996	0.0109384	0.877938	-0.0197592	0.0231192	1.00168	0.980435	1.02339	NA	NA	NA	0.93752	1
BCAC_OncoArray	Histidine betaine (hercynine) levels	Inverse variance weighted	4	0.0897667	0.0879753	0.307557	-0.0826649	0.262198	1.09392	0.92066	1.29978	NA	NA	NA	0.568138	1
BCAC_OncoArray	Histidine levels	Wald ratio	rs7663032	-0.0448595	0.0914248	0.623659	-0.224052	0.134333	0.956132	0.799274	1.14377	NA	NA	NA	0.824895	1
BCAC_OncoArray	Histidine to alanine ratio	Wald ratio	rs1260326	0.167907	0.0954472	0.0785496	-0.0191692	0.354984	1.18283	0.981013	1.42616	NA	NA	NA	0.260281	1
BCAC_OncoArray	Histidine to asparagine ratio	Inverse variance weighted	21	0.0381542	0.012625	0.00251005	0.0134093	0.0628992	1.03889	1.0135	1.06492	0.888266	0.531733	TRUE	0.0248515	1
BCAC_OncoArray	Histidine to glutamine ratio	Wald ratio	rs1047891	-0.0846796	0.0942141	0.368759	-0.269339	0.0999801	0.918807	0.763884	1.10515	NA	NA	NA	0.608842	1
BCAC_OncoArray	Histidine to phosphate ratio	Wald ratio	rs12132412	-0.0204591	0.0941369	0.827948	-0.204967	0.164049	0.979749	0.814674	1.17827	NA	NA	NA	0.928513	1
BCAC_OncoArray	Histidine to pyruvate ratio	Inverse variance weighted	3	0.107944	0.0498449	0.0303427	0.0102475	0.20564	1.11398	1.0103	1.22831	0.643438	0.522488	TRUE	0.142056	1
BCAC_OncoArray	Histidine to trans-urocanate ratio	Wald ratio	rs3213737	0.0253314	0.02823	0.369547	-0.0299994	0.0806622	1.02565	0.970446	1.084	NA	NA	NA	0.60908	1
BCAC_OncoArray	Homoarginine levels	Inverse variance weighted	23	0.0127393	0.0119354	0.285809	-0.010654	0.0361327	1.01282	0.989403	1.03679	NA	NA	NA	0.544698	1
BCAC_OncoArray	Homocitrulline levels	Inverse variance weighted	13	0.0318813	0.0179662	0.075978	-0.00333246	0.067095	1.03239	0.996673	1.0694	NA	NA	NA	0.257136	1
BCAC_OncoArray	Homostachydrine levels	Inverse variance weighted	9	-0.083349	0.0235742	0.000406841	-0.129554	-0.0371436	0.92003	0.878487	0.963538	0.338605	0.96334	TRUE	0.0064607	0.386906
BCAC_OncoArray	Hydantoin-5-propionate levels	Inverse variance weighted	2	-0.0928446	0.067036	0.166054	-0.224235	0.038546	0.911335	0.799127	1.0393	NA	NA	NA	0.410174	1
BCAC_OncoArray	Hydroxy-cmpf levels	Inverse variance weighted	2	0.125722	0.0582883	0.031013	0.0114773	0.239967	1.13397	1.01154	1.27121	0.6804	NA	TRUE	0.142056	1
BCAC_OncoArray	Hydroxypalmitoyl sphingomyelin (d18:1_16:0(OH)) levels	Inverse variance weighted	7	-0.0102299	0.0234636	0.662844	-0.0562186	0.0357587	0.989822	0.945332	1.03641	NA	NA	NA	0.855727	1
BCAC_OncoArray	Hypotaurine levels	Inverse variance weighted	5	-0.0551193	0.0376896	0.143617	-0.128991	0.0187523	0.946372	0.878982	1.01893	NA	NA	NA	0.374191	1
BCAC_OncoArray	Hypotaurine to cysteine ratio	Inverse variance weighted	6	-0.0348591	0.0349905	0.319131	-0.10344	0.0337222	0.965741	0.90173	1.0343	NA	NA	NA	0.570477	1
BCAC_OncoArray	Hypotaurine to taurine ratio	Inverse variance weighted	4	-0.0620767	0.0458627	0.175885	-0.151968	0.0278141	0.939811	0.859016	1.0282	NA	NA	NA	0.423818	1
BCAC_OncoArray	Imidazole lactate levels	Inverse variance weighted	44	-0.0303066	0.00870648	0.000499693	-0.0473713	-0.0132419	0.970148	0.953733	0.986845	0.0836272	0.598453	TRUE	0.0072046	0.475208
BCAC_OncoArray	Indoleacetate levels	Inverse variance weighted	4	-0.0116215	0.0429472	0.786698	-0.095798	0.0725549	0.988446	0.908648	1.07525	NA	NA	NA	0.913492	1
BCAC_OncoArray	Indoleacetoylcarnitine levels	Inverse variance weighted	25	-0.00430245	0.0124697	0.73007	-0.0287431	0.0201382	0.995707	0.971666	1.02034	NA	NA	NA	0.887863	1
BCAC_OncoArray	Indoleacetylglutamine levels	Inverse variance weighted	15	0.00635688	0.01596	0.690409	-0.0249248	0.0376385	1.00638	0.975383	1.03836	NA	NA	NA	0.86849	1
BCAC_OncoArray	Indolebutyrate levels	Inverse variance weighted	7	0.00417056	0.0238089	0.860948	-0.0424949	0.050836	1.00418	0.958395	1.05215	NA	NA	NA	0.93752	1
BCAC_OncoArray	Indolelactate levels	Inverse variance weighted	4	-0.0213317	0.034252	0.533425	-0.0884656	0.0458022	0.978894	0.915335	1.04687	NA	NA	NA	0.769783	1
BCAC_OncoArray	Indolepropionate levels	Inverse variance weighted	11	0.0191388	0.0223629	0.392094	-0.0246926	0.0629701	1.01932	0.97561	1.065	NA	NA	NA	0.626699	1
BCAC_OncoArray	Indolin-2-one levels	Inverse variance weighted	2	0.0411741	0.0416963	0.32341	-0.0405507	0.122899	1.04203	0.96026	1.13077	NA	NA	NA	0.574017	1
BCAC_OncoArray	Isobutyrylcarnitine (c4) levels	Inverse variance weighted	24	0.0383839	0.0146886	0.00897071	0.00959415	0.0671736	1.03913	1.00964	1.06948	0.00571799	0.540002	TRUE	0.0656242	1
BCAC_OncoArray	Isobutyrylglycine levels	Inverse variance weighted	8	0.0694225	0.0221315	0.00170787	0.0260449	0.1128	1.07189	1.02639	1.11941	0.599452	0.604427	TRUE	0.0203797	1
BCAC_OncoArray	Isoursodeoxycholate levels	Wald ratio	rs3756669	-0.086193	0.0861778	0.317225	-0.255101	0.0827154	0.917417	0.774838	1.08623	NA	NA	NA	0.568138	1
BCAC_OncoArray	Isovalerylcarnitine (C5) levels	Inverse variance weighted	15	-0.0727275	0.0177835	4.32091e-05	-0.107583	-0.0378719	0.929854	0.898002	0.962836	0.719026	0.441836	TRUE	0.00136973	0.0410918
BCAC_OncoArray	Isovalerylglycine levels	Inverse variance weighted	5	0.0759037	0.0503347	0.13156	-0.0227523	0.17456	1.07886	0.977505	1.19072	NA	NA	NA	0.357467	1
BCAC_OncoArray	Kynurenate levels	Inverse variance weighted	10	-0.0803046	0.0200265	6.07376e-05	-0.119557	-0.0410528	0.922835	0.887314	0.959778	0.923679	0.552101	TRUE	0.00167579	0.0577615
BCAC_OncoArray	Kynurenine levels	Inverse variance weighted	8	-0.109783	0.0520266	0.0348474	-0.211755	-0.00781062	0.896029	0.809163	0.99222	7.34525e-05	0.153665	TRUE	0.153431	1
BCAC_OncoArray	Lactosyl-N-palmitoyl-sphingosine (d18:1_16:0) levels	Inverse variance weighted	6	0.0433458	0.0295855	0.142893	-0.0146418	0.101333	1.0443	0.985465	1.10665	NA	NA	NA	0.373867	1
BCAC_OncoArray	Laurylcarnitine levels	Inverse variance weighted	2	0.0526616	0.0638996	0.409865	-0.0725815	0.177905	1.05407	0.92999	1.19471	NA	NA	NA	0.648555	1
BCAC_OncoArray	Levulinoylcarnitine levels	Inverse variance weighted	5	-0.0307835	0.0299708	0.304366	-0.0895262	0.0279592	0.969686	0.914364	1.02835	NA	NA	NA	0.567552	1
BCAC_OncoArray	Lignoceroyl sphingomyelin (d18:1_24:0) levels	Inverse variance weighted	2	0.00788405	0.0629792	0.900377	-0.115555	0.131323	1.00792	0.890871	1.14034	NA	NA	NA	0.939911	1
BCAC_OncoArray	Lignoceroylcarnitine (C24) levels	Inverse variance weighted	21	-0.00557933	0.013043	0.668823	-0.0311436	0.019985	0.994436	0.969336	1.02019	NA	NA	NA	0.857413	1
BCAC_OncoArray	Linolenoylcarnitine (C18:3) levels	Inverse variance weighted	6	-0.0130379	0.0732473	0.858724	-0.156603	0.130527	0.987047	0.855044	1.13943	NA	NA	NA	0.93752	1
BCAC_OncoArray	Linoleoyl-arachidonoyl-glycerol (18:2_20:4) [1] levels	Inverse variance weighted	16	-0.0164185	0.0204552	0.422173	-0.0565106	0.0236736	0.983716	0.945056	1.02396	NA	NA	NA	0.658554	1
BCAC_OncoArray	Linoleoyl-arachidonoyl-glycerol (18:2_20:4) [2] levels	Inverse variance weighted	15	-0.0267303	0.0226931	0.238836	-0.0712088	0.0177483	0.973624	0.931267	1.01791	NA	NA	NA	0.509548	1
BCAC_OncoArray	Linoleoyl ethanolamide levels	Inverse variance weighted	2	-0.0940869	0.0430541	0.0288655	-0.178473	-0.00970088	0.910204	0.836547	0.990346	0.24127	NA	TRUE	0.139346	1
BCAC_OncoArray	Lithocholate sulfate (1) levels	Wald ratio	rs10425975	-0.101882	0.0469174	0.029892	-0.19384	-0.00992393	0.903136	0.82379	0.990125	NA	NA	TRUE	0.142056	1
BCAC_OncoArray	Lysine levels	Inverse variance weighted	10	-0.033269	0.0221136	0.132464	-0.0766117	0.0100737	0.967278	0.926249	1.01012	NA	NA	NA	0.358898	1
BCAC_OncoArray	Malate levels	Inverse variance weighted	3	0.043704	0.0293913	0.137022	-0.0139028	0.101311	1.04467	0.986193	1.10662	NA	NA	NA	0.366033	1
BCAC_OncoArray	Maltotriose levels	Wald ratio	rs72670481	0.0235184	0.080747	0.770853	-0.134746	0.181782	1.0238	0.873938	1.19935	NA	NA	NA	0.906888	1
BCAC_OncoArray	Mannonate levels	Inverse variance weighted	9	0.0618667	0.0197357	0.00171993	0.0231847	0.100549	1.06382	1.02346	1.10578	0.995737	0.940786	TRUE	0.0203797	1
BCAC_OncoArray	Mannose levels	Inverse variance weighted	16	0.047274	0.0147628	0.00136368	0.0183388	0.0762092	1.04841	1.01851	1.07919	0.99975	0.846951	TRUE	0.0177652	1
BCAC_OncoArray	Mannose to fructose ratio	Inverse variance weighted	3	0.116913	0.0495479	0.0182949	0.0197991	0.214027	1.12402	1.02	1.23866	0.810168	0.642205	TRUE	0.106088	1
BCAC_OncoArray	Mannose to glycerol ratio	Inverse variance weighted	5	0.0875482	0.0299941	0.00351328	0.0287598	0.146337	1.09149	1.02918	1.15759	0.985695	0.849519	TRUE	0.030483	1
BCAC_OncoArray	Mannose to mannitol to sorbitol ratio	Wald ratio	rs780094	0.161759	0.0875623	0.0646952	-0.00986318	0.333381	1.17558	0.990185	1.39568	NA	NA	NA	0.23217	1
BCAC_OncoArray	Mannose to N-acetylglucosamine to N-acetylgalactosamine ratio	Inverse variance weighted	10	0.045176	0.0178983	0.0116014	0.0100954	0.0802567	1.04621	1.01015	1.08357	0.897226	0.539322	TRUE	0.078248	1
BCAC_OncoArray	Mannose to S-methylcysteine ratio	Inverse variance weighted	4	0.0712504	0.0295993	0.0160771	0.0132357	0.129265	1.07385	1.01332	1.13799	0.804999	0.565692	TRUE	0.0980083	1
BCAC_OncoArray	Mannose to trans-4-hydroxyproline ratio	Inverse variance weighted	3	0.104655	0.0365999	0.00424383	0.0329196	0.176391	1.11033	1.03347	1.1929	0.748416	0.590409	TRUE	0.0354025	1
BCAC_OncoArray	Margaroylcarnitine (C17) levels	Inverse variance weighted	3	-0.062461	0.0997609	0.531245	-0.257992	0.13307	0.93945	0.772601	1.14233	NA	NA	NA	0.768926	1
BCAC_OncoArray	Metabolonic lactone sulfate levels	Inverse variance weighted	57	-0.00327548	0.00568537	0.564531	-0.0144188	0.00786785	0.99673	0.985685	1.0079	NA	NA	NA	0.789514	1
BCAC_OncoArray	Methionine sulfone levels	Inverse variance weighted	33	-0.0218536	0.00883896	0.0134201	-0.039178	-0.00452928	0.978383	0.96158	0.995481	0.954277	0.613353	TRUE	0.0871845	1
BCAC_OncoArray	Methionine to methionine sulfoxide ratio	Wald ratio	rs4710080	-0.089113	0.0903633	0.324053	-0.266225	0.0879992	0.914742	0.766267	1.09199	NA	NA	NA	0.574017	1
BCAC_OncoArray	Methyl-4-hydroxybenzoate sulfate levels	Wald ratio	rs12443580	-0.137774	0.109188	0.20702	-0.351783	0.076235	0.871296	0.703433	1.07922	NA	NA	NA	0.468752	1
BCAC_OncoArray	Methyl glucopyranoside (alpha + beta) levels	Inverse variance weighted	9	0.0150699	0.0177106	0.394824	-0.0196428	0.0497826	1.01518	0.980549	1.05104	NA	NA	NA	0.629996	1
BCAC_OncoArray	Methylsuccinate levels	Wald ratio	rs610803	-0.0986461	0.0915359	0.281178	-0.278057	0.0807643	0.906063	0.757254	1.08412	NA	NA	NA	0.541971	1
BCAC_OncoArray	Methylsuccinoylcarnitine levels	Inverse variance weighted	15	0.0033871	0.0161221	0.833597	-0.0282123	0.0349865	1.00339	0.972182	1.03561	NA	NA	NA	0.931234	1
BCAC_OncoArray	Myo-inositol levels	Inverse variance weighted	2	-0.100947	0.0618621	0.102719	-0.222197	0.0203024	0.903981	0.800758	1.02051	NA	NA	NA	0.308157	1
BCAC_OncoArray	Myristoyl dihydrosphingomyelin (d18:0_14:0) levels	Inverse variance weighted	2	-0.00595356	0.0644666	0.926419	-0.132308	0.120401	0.994064	0.876071	1.12795	NA	NA	NA	0.955558	1
BCAC_OncoArray	N-acetyl-1-methylhistidine levels	Inverse variance weighted	63	0.0106859	0.00462505	0.020864	0.00162078	0.019751	1.01074	1.00162	1.01995	0.0876691	0.711844	TRUE	0.113381	1
BCAC_OncoArray	N-acetyl-2-aminoadipate levels	Inverse variance weighted	12	0.015371	0.0123449	0.213086	-0.00882507	0.039567	1.01549	0.991214	1.04036	NA	NA	NA	0.479065	1
BCAC_OncoArray	N-acetyl-2-aminooctanoate levels	Inverse variance weighted	38	0.0201852	0.00763976	0.00823868	0.00521129	0.0351591	1.02039	1.00522	1.03578	0.907903	0.0808563	TRUE	0.0612108	1
BCAC_OncoArray	N-acetyl-3-methylhistidine levels	Inverse variance weighted	11	0.0139999	0.011027	0.204227	-0.00761308	0.035613	1.0141	0.992416	1.03625	NA	NA	NA	0.465447	1
BCAC_OncoArray	N-acetyl-aspartyl-glutamate (naag) levels	Inverse variance weighted	362	-0.00719787	0.00274896	0.00883444	-0.0125858	-0.0018099	0.992828	0.987493	0.998192	2.46735e-29	0.86891	TRUE	0.0651283	1
BCAC_OncoArray	N-acetyl-beta-alanine levels	Inverse variance weighted	7	0.029049	0.0202876	0.152184	-0.0107147	0.0688127	1.02948	0.989342	1.07124	NA	NA	NA	0.385939	1
BCAC_OncoArray	N-acetyl-isoputreanine levels	Inverse variance weighted	27	-0.0289605	0.0141455	0.0406261	-0.0566858	-0.00123527	0.971455	0.944891	0.998765	0.0189842	0.653618	TRUE	0.164406	1
BCAC_OncoArray	N-acetyl-L-alanine levels	Inverse variance weighted	2	-0.114976	0.0700313	0.100636	-0.252237	0.0222854	0.891388	0.77706	1.02254	NA	NA	NA	0.302863	1
BCAC_OncoArray	N-acetyl-L-glutamine levels	Inverse variance weighted	59	0.0136952	0.00440595	0.00188147	0.00505949	0.0223308	1.01379	1.00507	1.02258	0.226316	0.0215994	TRUE	0.0209388	1
BCAC_OncoArray	N-acetylalliin levels	Inverse variance weighted	4	0.0314582	0.0233387	0.177691	-0.0142856	0.0772021	1.03196	0.985816	1.08026	NA	NA	NA	0.425652	1
BCAC_OncoArray	N-acetylarginine levels	Inverse variance weighted	67	0.0130484	0.00392573	0.000887946	0.00535397	0.0207428	1.01313	1.00537	1.02096	0.365181	0.127804	TRUE	0.0118935	0.844437
BCAC_OncoArray	N-acetylasparagine levels	Inverse variance weighted	74	0.0114113	0.00396291	0.0039827	0.00364401	0.0191786	1.01148	1.00365	1.01936	0.123008	0.206066	TRUE	0.0338174	1
BCAC_OncoArray	N-acetylcarnosine levels	Inverse variance weighted	30	0.00920467	0.0142076	0.517069	-0.0186422	0.0370516	1.00925	0.98153	1.03775	NA	NA	NA	0.757678	1
BCAC_OncoArray	N-acetylcitrulline levels	Inverse variance weighted	67	0.0116031	0.00397675	0.0035259	0.00380865	0.0193975	1.01167	1.00382	1.01959	0.344821	0.0839771	TRUE	0.030483	1
BCAC_OncoArray	N-acetylglucosamine_n-acetylgalactosamine levels	Inverse variance weighted	7	-0.0122058	0.0191435	0.523737	-0.049727	0.0253154	0.987868	0.951489	1.02564	NA	NA	NA	0.763443	1
BCAC_OncoArray	N-acetylglucosaminylasparagine levels	Inverse variance weighted	18	-0.0244347	0.0141372	0.0839169	-0.0521436	0.0032742	0.975861	0.949193	1.00328	NA	NA	NA	0.269977	1
BCAC_OncoArray	N-acetylglutamate levels	Inverse variance weighted	4	0.0396499	0.0418899	0.34388	-0.0424543	0.121754	1.04045	0.958434	1.12948	NA	NA	NA	0.589991	1
BCAC_OncoArray	N-acetylglycine levels	Inverse variance weighted	16	0.00677318	0.0137304	0.621802	-0.0201384	0.0336847	1.0068	0.980063	1.03426	NA	NA	NA	0.824733	1
BCAC_OncoArray	N-acetylhistidine levels	Inverse variance weighted	32	0.0207189	0.00957932	0.0305504	0.00194345	0.0394944	1.02094	1.00195	1.04028	0.620145	0.784563	TRUE	0.142056	1
BCAC_OncoArray	N-acetylkynurenine (2) levels	Inverse variance weighted	36	0.00741435	0.00784052	0.34433	-0.00795308	0.0227818	1.00744	0.992078	1.02304	NA	NA	NA	0.589991	1
BCAC_OncoArray	N-acetylleucine levels	Inverse variance weighted	36	0.0204552	0.00691821	0.00310928	0.00689554	0.0340149	1.02067	1.00692	1.0346	0.401264	0.119835	TRUE	0.0281612	1
BCAC_OncoArray	N-acetylmethionine levels	Wald ratio	rs148804382	-0.151882	0.0804864	0.0591536	-0.309635	0.00587149	0.85909	0.733714	1.00589	NA	NA	NA	0.218043	1
BCAC_OncoArray	N-acetylneuraminate levels	Inverse variance weighted	3	0.0446683	0.0405397	0.27053	-0.0347894	0.124126	1.04568	0.965809	1.13216	NA	NA	NA	0.537107	1
BCAC_OncoArray	N-acetylneuraminate to N-acetylglucosamine to N-acetylgalactosamine ratio	Inverse variance weighted	9	0.0214304	0.0181098	0.236668	-0.0140649	0.0569256	1.02166	0.986034	1.05858	NA	NA	NA	0.509548	1
BCAC_OncoArray	N-acetylphenylalanine levels	Inverse variance weighted	52	0.0119181	0.00683319	0.0811342	-0.00147499	0.0253111	1.01199	0.998526	1.02563	NA	NA	NA	0.264242	1
BCAC_OncoArray	N-acetylproline levels	Wald ratio	rs2518814	-0.0137736	0.0802871	0.863788	-0.171136	0.143589	0.986321	0.842707	1.15441	NA	NA	NA	0.93752	1
BCAC_OncoArray	N-acetylputrescine levels	Inverse variance weighted	23	0.0211625	0.0103517	0.0409187	0.000873196	0.0414518	1.02139	1.00087	1.04232	0.794658	0.736079	TRUE	0.164735	1
BCAC_OncoArray	N-acetylputrescine to (N(1) + N(8))-acetylspermidine ratio	Inverse variance weighted	24	0.00597319	0.0119892	0.618334	-0.0175257	0.0294721	1.00599	0.982627	1.02991	NA	NA	NA	0.821278	1
BCAC_OncoArray	N-acetylserine levels	Inverse variance weighted	2	-0.104572	0.0653699	0.109665	-0.232697	0.0235528	0.90071	0.792393	1.02383	NA	NA	NA	0.322885	1
BCAC_OncoArray	N-acetyltaurine levels	Inverse variance weighted	7	0.0349146	0.0262999	0.184325	-0.0166332	0.0864623	1.03553	0.983504	1.09031	NA	NA	NA	0.432751	1
BCAC_OncoArray	N-acetylthreonine levels	Wald ratio	rs1047891	-0.087883	0.0977782	0.368759	-0.279528	0.103762	0.915868	0.75614	1.10934	NA	NA	NA	0.608842	1
BCAC_OncoArray	N-acetyltyrosine levels	Inverse variance weighted	53	0.0114927	0.00560485	0.0403163	0.000507204	0.0224782	1.01156	1.00051	1.02273	0.128313	0.0949979	TRUE	0.164406	1
BCAC_OncoArray	N-acetylvaline levels	Wald ratio	rs74289058	0.0242686	0.0935406	0.795293	-0.159071	0.207608	1.02457	0.852936	1.23073	NA	NA	NA	0.917463	1
BCAC_OncoArray	N-alpha-acetylornithine levels	Inverse variance weighted	4	0.0227512	0.0260257	0.38202	-0.0282592	0.0737615	1.02301	0.972136	1.07655	NA	NA	NA	0.620759	1
BCAC_OncoArray	N-delta-acetylornithine levels	Inverse variance weighted	67	-0.0117658	0.00436167	0.00698532	-0.0203146	-0.00321692	0.988303	0.97989	0.996788	0.214062	0.0674484	TRUE	0.0544512	1
BCAC_OncoArray	N-formylanthranilic acid levels	Inverse variance weighted	18	0.00699655	0.0124039	0.572715	-0.0173152	0.0313083	1.00702	0.982834	1.0318	NA	NA	NA	0.791979	1
BCAC_OncoArray	N-formylmethionine levels	Inverse variance weighted	6	-0.0131539	0.0397085	0.740446	-0.0909825	0.0646747	0.986932	0.913034	1.06681	NA	NA	NA	0.88888	1
BCAC_OncoArray	N-methyl-2-pyridone-5-carboxamide levels	Inverse variance weighted	2	0.283379	0.0622513	5.30939e-06	0.161366	0.405392	1.32761	1.17512	1.49989	0.959889	NA	TRUE	0.000210385	0.00504923
BCAC_OncoArray	N-methylproline levels	Wald ratio	rs116522067	0.131381	0.0944333	0.164147	-0.0537082	0.31647	1.1404	0.947709	1.37228	NA	NA	NA	0.408649	1
BCAC_OncoArray	N-oleoylserine levels	Inverse variance weighted	2	-0.091349	0.036169	0.0115496	-0.16224	-0.0204578	0.912699	0.850237	0.97975	0.300937	NA	TRUE	0.078248	1
BCAC_OncoArray	N-oleoyltaurine levels	Inverse variance weighted	6	-0.0427526	0.0294672	0.146821	-0.100508	0.0150031	0.958148	0.904378	1.01512	NA	NA	NA	0.378392	1
BCAC_OncoArray	N-palmitoyl-heptadecasphingosine (d17:1_16:0) levels	Inverse variance weighted	6	0.0933502	0.0239398	9.64433e-05	0.0464282	0.140272	1.09785	1.04752	1.15059	0.929869	0.625413	TRUE	0.00229294	0.0917176
BCAC_OncoArray	N-palmitoyl-sphingosine (d18:1 to 16:0) to N-palmitoyl-sphinganine (d18:0 to 16:0) ratio	Inverse variance weighted	7	0.11932	0.0295592	5.42169e-05	0.0613844	0.177256	1.12673	1.06331	1.19394	0.970285	0.546505	TRUE	0.00161126	0.0515603
BCAC_OncoArray	N-palmitoyl-sphingosine (d18:1 to 16:0) to N-stearoyl-sphingosine (d18:1 to 18:0) ratio	Inverse variance weighted	7	-0.0456356	0.0251376	0.0694571	-0.0949052	0.00363401	0.95539	0.909459	1.00364	NA	NA	NA	0.24374	1
BCAC_OncoArray	N-palmitoylglycine levels	Inverse variance weighted	27	-0.0436986	0.0171518	0.0108417	-0.0773162	-0.0100811	0.957242	0.925597	0.98997	0.00904912	0.72015	TRUE	0.0747403	1
BCAC_OncoArray	N-stearoyl-sphingadienine (d18:2_18:0) levels	Inverse variance weighted	2	0.0733496	0.0699727	0.294518	-0.0637968	0.210496	1.07611	0.938196	1.23429	NA	NA	NA	0.555728	1
BCAC_OncoArray	N-stearoyl-sphinganine (d18:0_18:0) levels	Wald ratio	rs364585	0.0388159	0.0712654	0.585983	-0.100864	0.178496	1.03958	0.904056	1.19542	NA	NA	NA	0.803686	1
BCAC_OncoArray	N-stearoyl-sphingosine (d18:1 to 18:0) to N-palmitoyl-sphinganine (d18:0 to 16:0) ratio	Inverse variance weighted	7	0.0795931	0.0261075	0.00229859	0.0284224	0.130764	1.08285	1.02883	1.1397	0.834805	0.248984	TRUE	0.023414	1
BCAC_OncoArray	N-stearoyl-sphingosine (d18:1_18:0) levels	Inverse variance weighted	11	0.124338	0.0254876	1.06962e-06	0.0743823	0.174293	1.1324	1.07722	1.1904	0.33887	0.138317	TRUE	5.08607e-05	0.00101721
BCAC_OncoArray	N-succinyl-phenylalanine levels	Inverse variance weighted	30	0.0871057	0.0150358	6.90478e-09	0.0576355	0.116576	1.09101	1.05933	1.12364	6.67846e-05	0.00286638	TRUE	6.56645e-07	6.56645e-06
BCAC_OncoArray	N,N-dimethylalanine levels	Inverse variance weighted	10	-0.0382937	0.0256568	0.135559	-0.088581	0.0119936	0.96243	0.915229	1.01207	NA	NA	NA	0.36417	1
BCAC_OncoArray	N,N,N-trimethyl-5-aminovalerate levels	Inverse variance weighted	25	-0.00681647	0.0244628	0.780517	-0.0547636	0.0411307	0.993207	0.946709	1.04199	NA	NA	NA	0.911881	1
BCAC_OncoArray	N,n,n-trimethyl-alanylproline betaine (tmap) levels	Wald ratio	rs117050209	-0.212351	0.132494	0.108995	-0.472039	0.0473367	0.808681	0.623729	1.04847	NA	NA	NA	0.322314	1
BCAC_OncoArray	N1-methyladenosine levels	Inverse variance weighted	2	0.112015	0.0623757	0.0725252	-0.0102416	0.234271	1.11853	0.989811	1.26399	NA	NA	NA	0.249897	1
BCAC_OncoArray	N1-methylinosine levels	Wald ratio	rs1171615	0.0518065	0.0868974	0.551055	-0.118512	0.222125	1.05317	0.888241	1.24873	NA	NA	NA	0.783783	1
BCAC_OncoArray	N2-acetyl,N6-methyllysine levels	Inverse variance weighted	114	0.00824724	0.0036261	0.0229414	0.00114008	0.0153544	1.00828	1.00114	1.01547	0.411316	0.132079	TRUE	0.119875	1
BCAC_OncoArray	N2-acetyl,N6,N6-dimethyllysine levels	Inverse variance weighted	104	0.00870332	0.00416762	0.0367689	0.000534794	0.0168719	1.00874	1.00053	1.01701	0.418803	0.0209943	TRUE	0.156804	1
BCAC_OncoArray	N2,n2-dimethylguanosine levels	Inverse variance weighted	2	-0.0543658	0.0721916	0.451404	-0.195861	0.0871298	0.947086	0.822126	1.09104	NA	NA	NA	0.694155	1
BCAC_OncoArray	N2,N5-diacetylornithine levels	Inverse variance weighted	23	0.0132081	0.00988527	0.181503	-0.00616702	0.0325832	1.0133	0.993852	1.03312	NA	NA	NA	0.429377	1
BCAC_OncoArray	N4-acetylcytidine levels	Inverse variance weighted	16	-0.0542665	0.0175654	0.00200561	-0.0886946	-0.0198384	0.94718	0.915125	0.980357	0.804316	0.849503	TRUE	0.0214307	1
BCAC_OncoArray	N6-acetyllysine levels	Inverse variance weighted	11	-0.0423623	0.0182718	0.0204247	-0.078175	-0.00654959	0.958522	0.924803	0.993472	0.127187	0.286531	TRUE	0.112277	1
BCAC_OncoArray	N6-carbamoylthreonyladenosine levels	Inverse variance weighted	14	-0.428987	0.029864	8.61872e-47	-0.487521	-0.370454	0.651168	0.614147	0.690421	0.92068	0.100221	TRUE	4.0982e-44	8.19641e-44
BCAC_OncoArray	N6-methyllysine levels	Inverse variance weighted	80	0.000769165	0.00513032	0.880824	-0.00928627	0.0108246	1.00077	0.990757	1.01088	NA	NA	NA	0.93752	1
BCAC_OncoArray	N6,N6-dimethyllysine levels	Inverse variance weighted	73	-0.00299796	0.00497592	0.546846	-0.0127508	0.00675485	0.997007	0.98733	1.00678	NA	NA	NA	0.78203	1
BCAC_OncoArray	N6,n6,n6-trimethyllysine levels	Inverse variance weighted	8	0.025761	0.0277524	0.353281	-0.0286337	0.0801557	1.0261	0.971772	1.08346	NA	NA	NA	0.599947	1
BCAC_OncoArray	Nervonoylcarnitine (C24:1) levels	Inverse variance weighted	12	-0.0412197	0.0265179	0.120086	-0.0931947	0.0107553	0.959618	0.911016	1.01081	NA	NA	NA	0.339886	1
BCAC_OncoArray	Nisinate (24:6n3) levels	Inverse variance weighted	2	0.0184884	0.0408503	0.650845	-0.0615782	0.098555	1.01866	0.940279	1.10358	NA	NA	NA	0.846722	1
BCAC_OncoArray	Nonanoylcarnitine (C9) levels	Inverse variance weighted	28	-0.0192639	0.00942927	0.0410538	-0.0377452	-0.0007825	0.98092	0.962958	0.999218	0.97327	0.207638	TRUE	0.164735	1
BCAC_OncoArray	O-sulfo-l-tyrosine levels	Inverse variance weighted	2	-0.137501	0.134916	0.308125	-0.401935	0.126934	0.871534	0.669024	1.13534	NA	NA	NA	0.568138	1
BCAC_OncoArray	Octadecadienedioate (C18:2-DC) levels	Inverse variance weighted	6	0.0157831	0.0173813	0.363852	-0.0182842	0.0498503	1.01591	0.981882	1.05111	NA	NA	NA	0.608842	1
BCAC_OncoArray	Octadecanedioate levels	Inverse variance weighted	7	0.013263	0.0264558	0.616142	-0.0385904	0.0651163	1.01335	0.962145	1.06728	NA	NA	NA	0.821278	1
BCAC_OncoArray	Octadecanedioylcarnitine (C18-DC) levels	Inverse variance weighted	14	0.0153216	0.0142989	0.283935	-0.0127043	0.0433476	1.01544	0.987376	1.0443	NA	NA	NA	0.544698	1
BCAC_OncoArray	Octadecenedioate (C18:1-DC) levels	Inverse variance weighted	3	-2.58731e-07	0.0201844	0.99999	-0.0395616	0.0395611	1	0.961211	1.04035	NA	NA	NA	0.99999	1
BCAC_OncoArray	Octadecenedioylcarnitine (C18:1-DC) levels	Inverse variance weighted	5	-0.0036052	0.0165791	0.827854	-0.0361002	0.0288898	0.996401	0.964544	1.02931	NA	NA	NA	0.928513	1
BCAC_OncoArray	Octanoylcarnitine (c8) levels	Inverse variance weighted	33	-0.0181772	0.00909788	0.0457205	-0.0360091	-0.000345398	0.981987	0.964632	0.999655	0.99347	0.0529392	TRUE	0.17967	1
BCAC_OncoArray	Oleoyl-linoleoyl-glycerol (18:1 to 18:2) [2] to linoleoyl-arachidonoyl-glycerol (18:2 to 20:4) [1] ratio	Inverse variance weighted	21	-0.00707574	0.0137082	0.605735	-0.0339437	0.0197922	0.992949	0.966626	1.01999	NA	NA	NA	0.817334	1
BCAC_OncoArray	Oleoyl-linoleoyl-glycerol (18:1 to 18:2) [2] to linoleoyl-arachidonoyl-glycerol (18:2 to 20:4) [2] ratio	Inverse variance weighted	16	-0.00410469	0.0160442	0.798077	-0.0355513	0.0273419	0.995904	0.965073	1.02772	NA	NA	NA	0.917901	1
BCAC_OncoArray	Oleoyl-linoleoyl-glycerol (18:1_18:2) [2] levels	Inverse variance weighted	11	-0.078419	0.025244	0.00189355	-0.127897	-0.0289407	0.924577	0.879944	0.971474	0.547	0.66747	TRUE	0.0209388	1
BCAC_OncoArray	Oleoyl ethanolamide levels	Inverse variance weighted	8	-0.113128	0.0375086	0.00256093	-0.186645	-0.0396109	0.893036	0.829738	0.961163	0.0133734	0.389823	TRUE	0.0248515	1
BCAC_OncoArray	Oleoylcarnitine levels	Inverse variance weighted	4	-0.0280374	0.0813081	0.730223	-0.187401	0.131326	0.972352	0.829111	1.14034	NA	NA	NA	0.887863	1
BCAC_OncoArray	Ornithine levels	Wald ratio	rs17788484	0.0845623	0.0619535	0.172274	-0.0368665	0.205991	1.08824	0.963805	1.22874	NA	NA	NA	0.420084	1
BCAC_OncoArray	Ornithine to glutamate ratio	Inverse variance weighted	3	-0.0672133	0.0590896	0.255338	-0.183029	0.0486024	0.934996	0.832744	1.0498	NA	NA	NA	0.527883	1
BCAC_OncoArray	Ornithine to phosphate ratio	Inverse variance weighted	2	0.122718	0.0613139	0.0453418	0.00254267	0.242893	1.13057	1.00255	1.27493	0.733801	NA	TRUE	0.178921	1
BCAC_OncoArray	Orotate levels	Inverse variance weighted	43	0.0156122	0.00870646	0.0729444	-0.00145243	0.0326769	1.01573	0.998549	1.03322	NA	NA	NA	0.250434	1
BCAC_OncoArray	Orotidine levels	Inverse variance weighted	18	-0.0408639	0.00853145	1.66952e-06	-0.0575855	-0.0241422	0.95996	0.944041	0.976147	0.22883	0.996541	TRUE	7.56056e-05	0.00158772
BCAC_OncoArray	Oxalate (ethanedioate) levels	Inverse variance weighted	4	0.113817	0.042505	0.00741223	0.0305072	0.197127	1.12055	1.03098	1.2179	0.945777	0.619869	TRUE	0.0559447	1
BCAC_OncoArray	P-cresol glucuronide levels	Inverse variance weighted	3	0.0235119	0.0463779	0.612181	-0.0673889	0.114413	1.02379	0.934832	1.12121	NA	NA	NA	0.819978	1
BCAC_OncoArray	Palmitoleate (16:1n7) levels	Wald ratio	rs603424	-0.00463888	0.078605	0.95294	-0.158705	0.149427	0.995372	0.853248	1.16117	NA	NA	NA	0.968212	1
BCAC_OncoArray	Palmitoleoylcarnitine (C16:1) levels	Inverse variance weighted	3	-0.16904	0.0945823	0.0739008	-0.354421	0.0163412	0.844475	0.701579	1.01648	NA	NA	NA	0.251898	1
BCAC_OncoArray	Palmitoyl-sphingosine-phosphoethanolamine (d18:1_16:0) levels	Inverse variance weighted	3	0.133349	0.0521171	0.0105084	0.0311992	0.235498	1.14265	1.03169	1.26554	0.985626	0.968141	TRUE	0.0740178	1
BCAC_OncoArray	Palmitoyl dihydrosphingomyelin (d18:0_16:0) levels	Inverse variance weighted	5	-0.122136	0.0349846	0.000480983	-0.190706	-0.053566	0.885028	0.826376	0.947843	0.58948	0.988092	TRUE	0.0072046	0.457415
BCAC_OncoArray	Palmitoyl sphingomyelin (d18:1_16:0) levels	Inverse variance weighted	4	0.0688991	0.0446609	0.122899	-0.0186362	0.156434	1.07133	0.981536	1.16933	NA	NA	NA	0.343757	1
BCAC_OncoArray	Palmitoylcarnitine levels (Metabolon platform)	Inverse variance weighted	3	0.0168052	0.134215	0.900357	-0.246257	0.279867	1.01695	0.781721	1.32295	NA	NA	NA	0.939911	1
BCAC_OncoArray	Pantothenate levels	Wald ratio	rs116400211	-0.0607799	0.103009	0.555162	-0.262678	0.141118	0.94103	0.768989	1.15156	NA	NA	NA	0.784529	1
BCAC_OncoArray	Paraxanthine levels in elite athletes	Wald ratio	rs56113850	0.084344	0.0762474	0.268645	-0.0651009	0.233789	1.088	0.936973	1.26338	NA	NA	NA	0.5356	1
BCAC_OncoArray	Paraxanthine to 5-acetylamino-6-formylamino-3-methyluracil ratio	Inverse variance weighted	66	-0.00843797	0.00643516	0.18978	-0.0210509	0.00417494	0.991598	0.979169	1.00418	NA	NA	NA	0.441274	1
BCAC_OncoArray	Paraxanthine to linoleate (18:2n6) ratio	Wald ratio	rs56113850	0.0843379	0.0762419	0.268645	-0.0650962	0.233772	1.088	0.936977	1.26336	NA	NA	NA	0.5356	1
BCAC_OncoArray	Pentose acid levels	Wald ratio	rs146924265	0.149722	0.100588	0.136627	-0.0474301	0.346874	1.16151	0.953677	1.41464	NA	NA	NA	0.366006	1
BCAC_OncoArray	Perfluorooctanesulfonate (PFOS) levels	Wald ratio	rs141471965	-0.276846	0.0885506	0.00176954	-0.450405	-0.103287	0.758171	0.63737	0.901869	NA	NA	TRUE	0.0203797	1
BCAC_OncoArray	Phenylacetate levels	Wald ratio	rs59532339	-0.104378	0.0576139	0.0700366	-0.217301	0.00854566	0.900885	0.804688	1.00858	NA	NA	NA	0.243974	1
BCAC_OncoArray	Phenylacetylcarnitine levels	Inverse variance weighted	2	0.0129949	0.0393471	0.741201	-0.0641255	0.0901153	1.01308	0.937887	1.0943	NA	NA	NA	0.88888	1
BCAC_OncoArray	Phenylacetylglutamate levels	Inverse variance weighted	3	0.0772691	0.0337741	0.0221479	0.0110719	0.143466	1.08033	1.01113	1.15427	0.523151	0.515641	TRUE	0.117015	1
BCAC_OncoArray	Phenylalanine to tyrosine ratio	Inverse variance weighted	13	-0.0339187	0.0197333	0.08564	-0.0725958	0.00475849	0.96665	0.929977	1.00477	NA	NA	NA	0.274221	1
BCAC_OncoArray	Phenyllactate (PLA) levels in elite athletes	Inverse variance weighted	5	0.00273777	0.0192996	0.887194	-0.0350895	0.0405651	1.00274	0.965519	1.0414	NA	NA	NA	0.93752	1
BCAC_OncoArray	Phenylpyruvate levels	Inverse variance weighted	3	-0.037405	0.0415925	0.368481	-0.118926	0.0441163	0.963286	0.887873	1.0451	NA	NA	NA	0.608842	1
BCAC_OncoArray	Phenylpyruvate to citrate ratio	Inverse variance weighted	3	-0.0438733	0.04972	0.377556	-0.141325	0.0535778	0.957075	0.868208	1.05504	NA	NA	NA	0.619061	1
BCAC_OncoArray	Phosphate levels (UKB data field 30810)	Inverse variance weighted	2	0.0382411	0.0541188	0.479806	-0.0678318	0.144314	1.03898	0.934418	1.15525	NA	NA	NA	0.720846	1
BCAC_OncoArray	Phosphate to 2'-deoxyuridine ratio	Inverse variance weighted	6	0.00218883	0.0219749	0.920657	-0.040882	0.0452597	1.00219	0.959942	1.0463	NA	NA	NA	0.951679	1
BCAC_OncoArray	Phosphate to 5-oxoproline ratio	Inverse variance weighted	12	0.0151295	0.0172733	0.381091	-0.0187262	0.0489851	1.01524	0.981448	1.0502	NA	NA	NA	0.620759	1
BCAC_OncoArray	phosphate to asparagine ratio	Inverse variance weighted	16	0.0363577	0.0145319	0.0123522	0.00787514	0.0648402	1.03703	1.00791	1.06699	0.690704	0.904677	TRUE	0.0821461	1
BCAC_OncoArray	Phosphate to citrate ratio	Inverse variance weighted	4	-0.0396471	0.0438314	0.365712	-0.125557	0.0462625	0.961129	0.882006	1.04735	NA	NA	NA	0.608842	1
BCAC_OncoArray	Phosphate to glutamate ratio	Wald ratio	rs62354638	-0.0958997	0.0978573	0.327088	-0.2877	0.0959006	0.908555	0.749987	1.10065	NA	NA	NA	0.574017	1
BCAC_OncoArray	Phosphate to glutamine ratio	Wald ratio	rs12132412	0.0169557	0.0780168	0.827948	-0.135957	0.169869	1.0171	0.87288	1.18515	NA	NA	NA	0.928513	1
BCAC_OncoArray	Phosphate to linoleoyl-arachidonoyl-glycerol (18:2 to 20:4) [1] ratio	Inverse variance weighted	9	0.0115486	0.0324454	0.721886	-0.0520444	0.0751416	1.01162	0.949287	1.07804	NA	NA	NA	0.887863	1
BCAC_OncoArray	Phosphate to linoleoyl-arachidonoyl-glycerol (18:2 to 20:4) [2] ratio	Inverse variance weighted	11	0.0215871	0.0249551	0.387019	-0.027325	0.0704991	1.02182	0.973045	1.07304	NA	NA	NA	0.623823	1
BCAC_OncoArray	Phosphate to mannose ratio	Inverse variance weighted	10	-0.0571084	0.0189312	0.00255605	-0.0942136	-0.0200032	0.944492	0.910088	0.980196	0.998538	0.986509	TRUE	0.0248515	1
BCAC_OncoArray	Phosphate to N-acetylneuraminate ratio	Inverse variance weighted	2	-0.0291995	0.0514318	0.570217	-0.130006	0.0716068	0.971223	0.87809	1.07423	NA	NA	NA	0.791644	1
BCAC_OncoArray	Phosphate to oleoyl-linoleoyl-glycerol (18:1 to 18:2) [2] ratio	Inverse variance weighted	9	0.0647161	0.0296079	0.0288324	0.00668459	0.122748	1.06686	1.00671	1.1306	0.302817	0.411581	TRUE	0.139346	1
BCAC_OncoArray	Phosphate to phosphoethanolamine ratio	Wald ratio	rs1256335	-0.123694	0.0888167	0.163713	-0.297775	0.0503864	0.88365	0.742468	1.05168	NA	NA	NA	0.408638	1
BCAC_OncoArray	Phosphate to proline ratio	Inverse variance weighted	8	0.021763	0.0235452	0.355326	-0.0243856	0.0679117	1.022	0.975909	1.07027	NA	NA	NA	0.602345	1
BCAC_OncoArray	Phosphate to serine ratio	Inverse variance weighted	10	0.00380178	0.0275704	0.890324	-0.0502362	0.0578397	1.00381	0.951005	1.05955	NA	NA	NA	0.93752	1
BCAC_OncoArray	Phosphate to sulfate ratio	Wald ratio	rs116402366	-0.0858674	0.0784619	0.273787	-0.239653	0.0679179	0.917716	0.786901	1.07028	NA	NA	NA	0.538379	1
BCAC_OncoArray	Phosphate to threonine ratio	Inverse variance weighted	4	-0.0774964	0.0529222	0.1431	-0.181224	0.0262311	0.92543	0.834249	1.02658	NA	NA	NA	0.373867	1
BCAC_OncoArray	Phosphate to tryptophan ratio	Inverse variance weighted	4	-0.0744981	0.0486543	0.125727	-0.169861	0.0208643	0.928209	0.843782	1.02108	NA	NA	NA	0.3496	1
BCAC_OncoArray	Phosphate to tyrosine ratio	Inverse variance weighted	6	-0.0678317	0.0284247	0.0170157	-0.123544	-0.0121194	0.934418	0.883783	0.987954	0.912261	0.449795	TRUE	0.10167	1
BCAC_OncoArray	Phosphate to urate ratio	Inverse variance weighted	12	-0.0322892	0.0228375	0.157401	-0.0770506	0.0124723	0.968227	0.925843	1.01255	NA	NA	NA	0.39705	1
BCAC_OncoArray	Phosphate to uridine ratio	Inverse variance weighted	2	0.0508798	0.0472469	0.281529	-0.0417242	0.143484	1.0522	0.959134	1.15429	NA	NA	NA	0.541971	1
BCAC_OncoArray	Phosphocholine levels	Inverse variance weighted	8	-0.0325369	0.0322592	0.313163	-0.0957649	0.0306912	0.967987	0.908678	1.03117	NA	NA	NA	0.568138	1
BCAC_OncoArray	Phosphoethanolamine levels	Inverse variance weighted	4	0.00516712	0.0501755	0.917978	-0.0931769	0.103511	1.00518	0.911032	1.10906	NA	NA	NA	0.950977	1
BCAC_OncoArray	Phosphoethanolamine to choline ratio	Wald ratio	rs56702468	0.0355397	0.0948794	0.707975	-0.150424	0.221503	1.03618	0.860343	1.24795	NA	NA	NA	0.88011	1
BCAC_OncoArray	Picolinate levels	Inverse variance weighted	5	-0.0255932	0.0320386	0.424392	-0.088389	0.0372025	0.974731	0.915405	1.0379	NA	NA	NA	0.660319	1
BCAC_OncoArray	Picolinoylglycine levels	Inverse variance weighted	2	-0.0273821	0.0594595	0.645146	-0.143923	0.0891585	0.972989	0.865955	1.09325	NA	NA	NA	0.840457	1
BCAC_OncoArray	Pimeloylcarnitine_3-methyladipoylcarnitine (C7-DC) levels	Inverse variance weighted	13	-0.033108	0.0238891	0.165776	-0.0799305	0.0137146	0.967434	0.923181	1.01381	NA	NA	NA	0.410174	1
BCAC_OncoArray	Pipecolate levels	Wald ratio	rs10182251	-0.0360686	0.0859818	0.674857	-0.204593	0.132456	0.964574	0.814979	1.14163	NA	NA	NA	0.861462	1
BCAC_OncoArray	Plasma free asparagine levels	Inverse variance weighted	19	-0.03755	0.0124938	0.00265159	-0.0620379	-0.0130621	0.963146	0.939847	0.987023	0.742242	0.832342	TRUE	0.0250748	1
BCAC_OncoArray	Plasma free proline levels	Inverse variance weighted	10	-0.0216028	0.0211098	0.306141	-0.0629779	0.0197724	0.978629	0.938964	1.01997	NA	NA	NA	0.568138	1
BCAC_OncoArray	Pregnanediol-3-glucuronide levels	Inverse variance weighted	9	0.00233704	0.0175544	0.894089	-0.0320695	0.0367436	1.00234	0.968439	1.03743	NA	NA	NA	0.93752	1
BCAC_OncoArray	Pregnenediol disulfate (C21H34O8S2) levels	Inverse variance weighted	19	-0.046377	0.0139164	0.000860563	-0.0736531	-0.0191009	0.954682	0.928994	0.98108	0.708089	0.853567	TRUE	0.0116914	0.818395
BCAC_OncoArray	Pregnenediol sulfate (C21H34O5S) levels	Inverse variance weighted	14	-0.0331923	0.0320074	0.299728	-0.0959268	0.0295423	0.967353	0.908531	1.02998	NA	NA	NA	0.563872	1
BCAC_OncoArray	Pregnenetriol disulfate levels	Inverse variance weighted	12	-0.0264333	0.0155118	0.0883659	-0.0568364	0.00396975	0.973913	0.944749	1.00398	NA	NA	NA	0.279189	1
BCAC_OncoArray	Pregnenetriol sulfate levels	Inverse variance weighted	9	-0.0106314	0.0366847	0.771966	-0.0825333	0.0612706	0.989425	0.920781	1.06319	NA	NA	NA	0.906888	1
BCAC_OncoArray	Pregnenolone sulfate levels	Inverse variance weighted	6	-0.01014	0.0309015	0.742806	-0.0707069	0.0504268	0.989911	0.931735	1.05172	NA	NA	NA	0.889683	1
BCAC_OncoArray	Pro-hydroxy-pro levels	Wald ratio	rs62316592	-0.0371565	0.109512	0.73439	-0.2518	0.177487	0.963525	0.7774	1.19421	NA	NA	NA	0.887863	1
BCAC_OncoArray	Proline to glutamate ratio	Inverse variance weighted	2	-0.0334166	0.0489124	0.494485	-0.129285	0.0624517	0.967136	0.878724	1.06444	NA	NA	NA	0.732695	1
BCAC_OncoArray	Proline to trans-4-hydroxyproline ratio	Inverse variance weighted	4	-0.035857	0.0409503	0.381234	-0.11612	0.0444055	0.964778	0.890369	1.04541	NA	NA	NA	0.620759	1
BCAC_OncoArray	Prolylglycine levels	Wald ratio	rs164749	0.0166898	0.0774777	0.829445	-0.135167	0.168546	1.01683	0.87357	1.18358	NA	NA	NA	0.929095	1
BCAC_OncoArray	Propionylcarnitine (c3) levels	Inverse variance weighted	17	-0.0234747	0.0220568	0.287199	-0.0667059	0.0197565	0.976799	0.93547	1.01995	NA	NA	NA	0.545162	1
BCAC_OncoArray	Propionylglycine levels	Inverse variance weighted	15	0.0213589	0.0141137	0.130193	-0.00630398	0.0490217	1.02159	0.993716	1.05024	NA	NA	NA	0.355785	1
BCAC_OncoArray	Pseudouridine levels	Inverse variance weighted	2	0.0354649	0.085012	0.67655	-0.131159	0.202088	1.0361	0.877079	1.22396	NA	NA	NA	0.862465	1
BCAC_OncoArray	Pyruvate to 3-methyl-2-oxobutyrate ratio	Wald ratio	rs1440581	-0.0999327	0.0674395	0.13839	-0.232114	0.0322487	0.904898	0.792856	1.03277	NA	NA	NA	0.367623	1
BCAC_OncoArray	Pyruvate to N-acetylneuraminate ratio	Inverse variance weighted	2	-0.0324836	0.0557634	0.560213	-0.14178	0.0768126	0.968038	0.867812	1.07984	NA	NA	NA	0.785785	1
BCAC_OncoArray	Quinolinate levels	Inverse variance weighted	9	-0.0372173	0.0948225	0.694693	-0.223069	0.148635	0.963467	0.800059	1.16025	NA	NA	NA	0.871574	1
BCAC_OncoArray	Retinol (Vitamin A) levels	Wald ratio	rs1883711	0.0322632	0.0916452	0.724805	-0.147361	0.211888	1.03279	0.862982	1.23601	NA	NA	NA	0.887863	1
BCAC_OncoArray	Retinol (Vitamin A) to linoleoyl-arachidonoyl-glycerol (18:2 to 20:4) [1] ratio	Inverse variance weighted	10	0.0389853	0.0268133	0.145959	-0.0135688	0.0915394	1.03976	0.986523	1.09586	NA	NA	NA	0.377468	1
BCAC_OncoArray	Retinol (Vitamin A) to linoleoyl-arachidonoyl-glycerol (18:2 to 20:4) [2] ratio	Inverse variance weighted	10	0.0756885	0.0220915	0.000612243	0.0323891	0.118988	1.07863	1.03292	1.12636	0.428194	0.508665	TRUE	0.00843831	0.582243
BCAC_OncoArray	Retinol (Vitamin A) to oleoyl-linoleoyl-glycerol (18:1 to 18:2) [2] ratio	Inverse variance weighted	8	0.0553014	0.031274	0.0770126	-0.00599556	0.116598	1.05686	0.994022	1.12367	NA	NA	NA	0.257884	1
BCAC_OncoArray	Ribitol levels	Inverse variance weighted	12	-0.0865955	0.0151184	1.01737e-08	-0.116228	-0.0569634	0.917048	0.890273	0.944629	0.189842	0.415908	TRUE	8.79564e-07	9.67521e-06
BCAC_OncoArray	S-1-pyrroline-5-carboxylate levels	Inverse variance weighted	12	0.0677989	0.0185471	0.000256689	0.0314465	0.104151	1.07015	1.03195	1.10977	0.943714	0.255947	TRUE	0.00452058	0.244112
BCAC_OncoArray	S-adenosylhomocysteine (SAH) levels	Inverse variance weighted	4	-0.0259813	0.0258892	0.315593	-0.0767241	0.0247616	0.974353	0.926145	1.02507	NA	NA	NA	0.568138	1
BCAC_OncoArray	S-adenosylhomocysteine (SAH) to 5-methyluridine (ribothymidine) ratio	Inverse variance weighted	9	0.00885891	0.0186371	0.634546	-0.0276698	0.0453876	1.0089	0.97271	1.04643	NA	NA	NA	0.833506	1
BCAC_OncoArray	S-adenosylhomocysteine (SAH) to leucine ratio	Inverse variance weighted	5	-0.031457	0.0242111	0.193848	-0.0789107	0.0159967	0.969033	0.924122	1.01613	NA	NA	NA	0.446535	1
BCAC_OncoArray	S-allylcysteine levels	Wald ratio	rs2236872	-0.070911	0.0695271	0.307774	-0.207184	0.0653621	0.931545	0.81287	1.06755	NA	NA	NA	0.568138	1
BCAC_OncoArray	S-carboxyethylcysteine levels	Wald ratio	rs7519001	0.0561009	0.0800637	0.483488	-0.100824	0.213026	1.0577	0.904092	1.23742	NA	NA	NA	0.723477	1
BCAC_OncoArray	S-methylcysteine levels	Inverse variance weighted	2	-0.0345873	0.0296823	0.243919	-0.0927646	0.0235901	0.966004	0.911408	1.02387	NA	NA	NA	0.51157	1
BCAC_OncoArray	Sebacate (C10-DC) levels	Inverse variance weighted	4	0.0156159	0.0412681	0.705133	-0.0652696	0.0965014	1.01574	0.936815	1.10131	NA	NA	NA	0.878874	1
BCAC_OncoArray	Serine levels	Inverse variance weighted	15	0.00214694	0.0179029	0.904546	-0.0329428	0.0372366	1.00215	0.967594	1.03794	NA	NA	NA	0.942194	1
BCAC_OncoArray	Serine to alpha-ketobutyrate ratio	Inverse variance weighted	4	0.127452	0.0414147	0.00208765	0.0462797	0.208625	1.13593	1.04737	1.23198	0.518526	0.345973	TRUE	0.0220595	1
BCAC_OncoArray	Serine to alpha-tocopherol ratio	Inverse variance weighted	4	0.0308381	0.0363426	0.396139	-0.0403935	0.10207	1.03132	0.960411	1.10746	NA	NA	NA	0.631035	1
BCAC_OncoArray	Serine to pyruvate ratio	Inverse variance weighted	5	0.0912963	0.0357169	0.0105851	0.0212911	0.161301	1.09559	1.02152	1.17504	0.903812	0.597679	TRUE	0.0740178	1
BCAC_OncoArray	Serine to threonine ratio	Inverse variance weighted	21	0.00674725	0.0131207	0.607081	-0.0189694	0.0324638	1.00677	0.981209	1.033	NA	NA	NA	0.817334	1
BCAC_OncoArray	Spermidine levels	Wald ratio	rs3811444	0.0111797	0.0770861	0.884688	-0.139909	0.162269	1.01124	0.869437	1.17618	NA	NA	NA	0.93752	1
BCAC_OncoArray	Spermidine to (N(1) + N(8))-acetylspermidine ratio	Inverse variance weighted	6	-0.0647253	0.0314107	0.0393402	-0.12629	-0.00316026	0.937325	0.881359	0.996845	0.459639	0.296006	TRUE	0.16409	1
BCAC_OncoArray	Spermidine to carnitine ratio	Inverse variance weighted	2	-0.0154068	0.0439511	0.72593	-0.101551	0.0707373	0.984711	0.903435	1.0733	NA	NA	NA	0.887863	1
BCAC_OncoArray	Spermidine to choline ratio	Wald ratio	rs3811444	0.0121014	0.083441	0.884688	-0.151443	0.175646	1.01217	0.859467	1.19202	NA	NA	NA	0.93752	1
BCAC_OncoArray	Spermidine to ergothioneine ratio	Inverse variance weighted	5	-0.111463	0.0699418	0.111015	-0.248549	0.0256232	0.894525	0.779932	1.02595	NA	NA	NA	0.323849	1
BCAC_OncoArray	Spermidine to histidine ratio	Wald ratio	rs3811444	0.0116164	0.080097	0.884688	-0.145374	0.168607	1.01168	0.864699	1.18365	NA	NA	NA	0.93752	1
BCAC_OncoArray	Spermidine to N-acetylputrescine ratio	Inverse variance weighted	7	-0.0539246	0.0201215	0.00736329	-0.0933628	-0.0144865	0.947503	0.910863	0.985618	0.455799	0.678912	TRUE	0.0559447	1
BCAC_OncoArray	Spermidine to ornithine ratio	Wald ratio	rs3811444	0.0123817	0.0853738	0.884688	-0.154951	0.179714	1.01246	0.856457	1.19688	NA	NA	NA	0.93752	1
BCAC_OncoArray	Spermidine to phosphate ratio	Wald ratio	rs3811444	0.0122304	0.0843308	0.884688	-0.153058	0.177519	1.01231	0.85808	1.19425	NA	NA	NA	0.93752	1
BCAC_OncoArray	Spermidine to pyruvate ratio	Wald ratio	rs3811444	0.0118996	0.0820494	0.884688	-0.148917	0.172716	1.01197	0.86164	1.18853	NA	NA	NA	0.93752	1
BCAC_OncoArray	Sphingadienine levels	Wald ratio	rs1354034	0.00790783	0.059429	0.894143	-0.108573	0.124389	1.00794	0.897113	1.13246	NA	NA	NA	0.93752	1
BCAC_OncoArray	Sphinganine-1-phosphate levels	Wald ratio	rs12449930	0.155494	0.0764197	0.0418771	0.0057116	0.305277	1.16824	1.00573	1.357	NA	NA	TRUE	0.166886	1
BCAC_OncoArray	Sphinganine levels	Wald ratio	rs1354034	0.00871805	0.065518	0.894143	-0.119697	0.137133	1.00876	0.887189	1.14698	NA	NA	NA	0.93752	1
BCAC_OncoArray	Sphingomyelin (d17:1_14:0, d16:1_15:0) levels	Inverse variance weighted	5	0.114427	0.0329867	0.00052264	0.0497728	0.179081	1.12123	1.05103	1.19612	0.853934	0.678284	TRUE	0.00730928	0.497031
BCAC_OncoArray	Sphingomyelin (d17:1_16:0, d18:1_15:0, d16:1_17:0) levels	Inverse variance weighted	15	0.0873309	0.0158625	3.68128e-08	0.0562404	0.118421	1.09126	1.05785	1.12572	0.502818	0.848165	TRUE	2.693e-06	3.5009e-05
BCAC_OncoArray	Sphingomyelin (d17:2_16:0, d18:2_15:0) levels	Inverse variance weighted	7	0.105684	0.0274843	0.000120432	0.0518146	0.159553	1.11147	1.05318	1.17299	0.644743	0.158877	TRUE	0.00254514	0.114531
BCAC_OncoArray	Sphingomyelin (d18:0_18:0, d19:0_17:0) levels	Wald ratio	rs680379	0.039266	0.0624304	0.529378	-0.0830976	0.16163	1.04005	0.920261	1.17542	NA	NA	NA	0.768926	1
BCAC_OncoArray	Sphingomyelin (d18:0_20:0, d16:0_22:0) levels	Inverse variance weighted	8	-0.0230335	0.0226067	0.30826	-0.0673427	0.0212757	0.97723	0.934875	1.0215	NA	NA	NA	0.568138	1
BCAC_OncoArray	Sphingomyelin (d18:1_14:0, d16:1_16:0) levels	Inverse variance weighted	19	0.0649807	0.0139793	3.34588e-06	0.0375813	0.0923801	1.06714	1.0383	1.09678	0.219322	0.93925	TRUE	0.000138345	0.00318193
BCAC_OncoArray	Sphingomyelin (d18:1_17:0, d17:1_18:0, d19:1_16:0) levels	Inverse variance weighted	7	0.0883238	0.0391833	0.0241888	0.0115245	0.165123	1.09234	1.01159	1.17954	0.119291	0.379154	TRUE	0.124827	1
BCAC_OncoArray	Sphingomyelin (d18:1_18:1, d18:2_18:0) levels	Inverse variance weighted	6	0.0415088	0.0376525	0.27028	-0.0322901	0.115308	1.04238	0.968226	1.12222	NA	NA	NA	0.537107	1
BCAC_OncoArray	Sphingomyelin (d18:1_19:0, d19:1_18:0) levels	Inverse variance weighted	13	0.0541023	0.0198396	0.00639155	0.0152167	0.0929878	1.05559	1.01533	1.09745	0.231535	0.0275131	TRUE	0.050653	1
BCAC_OncoArray	Sphingomyelin (d18:1_20:0, d16:1_22:0) levels	Inverse variance weighted	17	0.0527842	0.0149601	0.000418181	0.0234625	0.082106	1.0542	1.02374	1.08557	0.447394	0.00570113	TRUE	0.00651952	0.397691
BCAC_OncoArray	Sphingomyelin (d18:1_20:1, d18:2_20:0) levels	Inverse variance weighted	11	0.0482948	0.0217445	0.0263497	0.0056757	0.090914	1.04948	1.00569	1.09517	0.97191	0.915629	TRUE	0.131887	1
BCAC_OncoArray	Sphingomyelin (d18:1_20:2, d18:2_20:1, d16:1_22:2) levels	Inverse variance weighted	6	0.0591775	0.0369162	0.10893	-0.0131783	0.131533	1.06096	0.986908	1.14058	NA	NA	NA	0.322314	1
BCAC_OncoArray	Sphingomyelin (d18:1_21:0, d17:1_22:0, d16:1_23:0) levels	Inverse variance weighted	13	0.0760948	0.0197718	0.000118766	0.0373421	0.114847	1.07906	1.03805	1.1217	0.191289	0.0288307	TRUE	0.00254514	0.112946
BCAC_OncoArray	Sphingomyelin (d18:1_22:1, d18:2_22:0, d16:1_24:1) levels	Inverse variance weighted	7	0.0837164	0.0300358	0.00531614	0.0248464	0.142587	1.08732	1.02516	1.15325	0.332305	0.0798703	TRUE	0.0432106	1
BCAC_OncoArray	Sphingomyelin (d18:1_22:2, d18:2_22:1, d16:1_24:2) levels	Inverse variance weighted	7	0.093316	0.0265761	0.000445958	0.0412269	0.145405	1.09781	1.04209	1.15651	0.575616	0.10258	TRUE	0.00684042	0.424106
BCAC_OncoArray	Sphingomyelin (d18:1_25:0, d19:0_24:1, d20:1_23:0, d19:1_24:0) levels	Inverse variance weighted	9	-0.00339318	0.0183354	0.853181	-0.0393306	0.0325443	0.996613	0.961433	1.03308	NA	NA	NA	0.93752	1
BCAC_OncoArray	Sphingomyelin (d18:2_14:0, d18:1_14:1) levels	Wald ratio	rs174544	0.0913605	0.0886975	0.302999	-0.0824866	0.265208	1.09566	0.920824	1.3037	NA	NA	NA	0.566114	1
BCAC_OncoArray	Sphingomyelin (d18:2_16:0, d18:1_16:1) levels	Wald ratio	rs174634	-0.0268931	0.102986	0.79399	-0.228746	0.17496	0.973465	0.795531	1.1912	NA	NA	NA	0.917463	1
BCAC_OncoArray	Sphingomyelin (d18:2_21:0, d16:2_23:0) levels	Inverse variance weighted	12	0.101732	0.0254562	6.4323e-05	0.051838	0.151626	1.10709	1.05321	1.16373	0.548976	0.136339	TRUE	0.0016992	0.0611712
BCAC_OncoArray	Sphingomyelin (d18:2_23:0, d18:1_23:1, d17:1_24:1) levels	Inverse variance weighted	4	0.141411	0.0456096	0.00193217	0.0520162	0.230806	1.1519	1.05339	1.25961	0.600246	0.451497	TRUE	0.0209388	1
BCAC_OncoArray	Sphingomyelin (d18:2_23:1) levels	Inverse variance weighted	4	0.1589	0.0423682	0.000176518	0.075858	0.241941	1.17222	1.07881	1.27372	0.945161	0.821838	TRUE	0.00349727	0.167869
BCAC_OncoArray	Sphingomyelin (d18:2_24:1, d18:1_24:2) levels	Wald ratio	rs174622	0.0469538	0.0966999	0.627278	-0.142578	0.236486	1.04807	0.86712	1.26679	NA	NA	NA	0.82738	1
BCAC_OncoArray	Sphingosine 1-phosphate levels	Wald ratio	rs1000821	0.169825	0.082892	0.0404865	0.0073567	0.332293	1.1851	1.00738	1.39416	NA	NA	TRUE	0.164406	1
BCAC_OncoArray	Sphingosine levels	Wald ratio	rs1354034	0.00790585	0.0594142	0.894143	-0.108546	0.124358	1.00794	0.897138	1.13242	NA	NA	NA	0.93752	1
BCAC_OncoArray	Sphingosine to phosphate ratio	Inverse variance weighted	2	0.0544576	0.0676583	0.420883	-0.0781528	0.187068	1.05597	0.924823	1.20571	NA	NA	NA	0.658321	1
BCAC_OncoArray	Stearidonate (18:4n3) levels	Inverse variance weighted	2	0.0110276	0.062009	0.85885	-0.11051	0.132565	1.01109	0.895377	1.14175	NA	NA	NA	0.93752	1
BCAC_OncoArray	Stearoyl sphingomyelin (d18:1_18:0) levels	Inverse variance weighted	8	0.0685191	0.0296429	0.020806	0.0104191	0.126619	1.07092	1.01047	1.13498	0.179717	0.877079	TRUE	0.113381	1
BCAC_OncoArray	Stearoylcarnitine levels	Inverse variance weighted	9	-0.00863312	0.0514842	0.866831	-0.109542	0.092276	0.991404	0.896244	1.09667	NA	NA	NA	0.93752	1
BCAC_OncoArray	Succinate to proline ratio	Inverse variance weighted	2	-0.0208912	0.0505254	0.679256	-0.119921	0.0781386	0.979325	0.88699	1.08127	NA	NA	NA	0.863467	1
BCAC_OncoArray	Succinimide levels	Wald ratio	rs16871364	-0.105698	0.0650033	0.103942	-0.233104	0.0217087	0.899697	0.792071	1.02195	NA	NA	NA	0.310845	1
BCAC_OncoArray	Succinoyltaurine levels	Inverse variance weighted	31	-0.0150598	0.0124434	0.226178	-0.0394488	0.00932927	0.985053	0.961319	1.00937	NA	NA	NA	0.499061	1
BCAC_OncoArray	Succinylcarnitine levels	Inverse variance weighted	18	0.00865791	0.0114507	0.449587	-0.0137854	0.0311012	1.0087	0.986309	1.03159	NA	NA	NA	0.694086	1
BCAC_OncoArray	Sulfate levels	Wald ratio	rs1343904	0.0223989	0.0891161	0.801547	-0.152269	0.197066	1.02265	0.858758	1.21782	NA	NA	NA	0.918399	1
BCAC_OncoArray	Sulfate of piperine metabolite C18H21NO3 (1) levels	Wald ratio	rs141471965	-0.234079	0.0748715	0.00176954	-0.380827	-0.087331	0.791299	0.683296	0.916374	NA	NA	TRUE	0.0203797	1
BCAC_OncoArray	Sulfate of piperine metabolite C18H21NO3 (3) levels	Wald ratio	rs141471965	-0.225645	0.0721737	0.00176954	-0.367105	-0.0841842	0.798002	0.692737	0.919262	NA	NA	TRUE	0.0203797	1
BCAC_OncoArray	Tartronate (hydroxymalonate) levels	Inverse variance weighted	4	0.117475	0.0441487	0.00779326	0.0309437	0.204006	1.12465	1.03143	1.22631	0.972317	0.753845	TRUE	0.0583574	1
BCAC_OncoArray	Taurine to glutamate ratio	Wald ratio	rs62354638	-0.0929119	0.0948085	0.327088	-0.278737	0.0929128	0.911274	0.756739	1.09737	NA	NA	NA	0.574017	1
BCAC_OncoArray	Tauro-beta-muricholate levels	Inverse variance weighted	15	-0.0245275	0.0101668	0.0158431	-0.0444543	-0.00460057	0.975771	0.956519	0.99541	0.410855	0.0044499	TRUE	0.0978363	1
BCAC_OncoArray	Taurochenodeoxycholic acid 3-sulfate levels	Inverse variance weighted	11	-0.0394773	0.0317508	0.213739	-0.101709	0.0227543	0.961292	0.903292	1.02302	NA	NA	NA	0.479401	1
BCAC_OncoArray	Taurocholenate sulfate levels	Inverse variance weighted	10	-0.0222729	0.0260092	0.391806	-0.0732509	0.0287051	0.977973	0.929368	1.02912	NA	NA	NA	0.626699	1
BCAC_OncoArray	Taurodeoxycholic acid 3-sulfate levels	Inverse variance weighted	6	-0.074579	0.0441111	0.0908924	-0.161037	0.0118787	0.928134	0.851261	1.01195	NA	NA	NA	0.282479	1
BCAC_OncoArray	Taurolithocholate 3-sulfate levels	Inverse variance weighted	3	-0.0470256	0.03998	0.239504	-0.125386	0.0313352	0.954063	0.882156	1.03183	NA	NA	NA	0.509548	1
BCAC_OncoArray	Tetradecadienedioate (C14:2-DC) levels	Inverse variance weighted	18	-0.0240215	0.0141264	0.0890428	-0.0517093	0.00366625	0.976265	0.949605	1.00367	NA	NA	NA	0.280396	1
BCAC_OncoArray	Tetradecadienoate (14:2) levels	Inverse variance weighted	4	0.00828609	0.0529666	0.875686	-0.0955285	0.112101	1.00832	0.908892	1.11863	NA	NA	NA	0.93752	1
BCAC_OncoArray	Tetradecanedioate (C14-DC) levels	Inverse variance weighted	5	0.00473679	0.018619	0.799182	-0.0317565	0.0412301	1.00475	0.968742	1.04209	NA	NA	NA	0.917901	1
BCAC_OncoArray	Tetrahydrocortisol glucuronide levels	Inverse variance weighted	4	0.0406497	0.0402139	0.312095	-0.0381697	0.119469	1.04149	0.96255	1.1269	NA	NA	NA	0.568138	1
BCAC_OncoArray	Theobromine levels	Inverse variance weighted	3	-0.0496995	0.164871	0.763076	-0.372847	0.273448	0.951515	0.688771	1.31449	NA	NA	NA	0.904844	1
BCAC_OncoArray	Thioproline levels	Wald ratio	rs149082870	-0.186446	0.089238	0.0366801	-0.361352	-0.0115391	0.829904	0.696734	0.988527	NA	NA	TRUE	0.156804	1
BCAC_OncoArray	Threonate levels	Inverse variance weighted	4	0.132706	0.0450333	0.00321048	0.0444403	0.220971	1.14191	1.04544	1.24729	0.993115	0.863869	TRUE	0.0288035	1
BCAC_OncoArray	Threonine levels	Inverse variance weighted	6	0.0620875	0.0313492	0.047646	0.000643044	0.123532	1.06406	1.00064	1.13149	0.464913	0.670181	TRUE	0.183653	1
BCAC_OncoArray	Threonine to alpha-ketobutyrate ratio	Inverse variance weighted	3	0.101174	0.0424312	0.0171054	0.0180093	0.18434	1.10647	1.01817	1.20242	0.853492	0.677379	TRUE	0.10167	1
BCAC_OncoArray	Threonine to pyruvate ratio	Inverse variance weighted	3	0.0966717	0.0389918	0.0131647	0.0202477	0.173096	1.1015	1.02045	1.18898	0.92672	0.782293	TRUE	0.0863424	1
BCAC_OncoArray	Thymol sulfate levels	Inverse variance weighted	4	-0.135923	0.0377924	0.000322454	-0.209996	-0.0618495	0.87291	0.810588	0.940024	0.979803	0.991485	TRUE	0.00557553	0.306654
BCAC_OncoArray	Thyroxine levels	Wald ratio	rs6722076	0.00270528	0.0831985	0.974061	-0.160364	0.165774	1.00271	0.851834	1.18031	NA	NA	NA	0.981284	1
BCAC_OncoArray	Thyroxine to taurocholate ratio	Wald ratio	rs76149982	-0.149537	0.111792	0.181016	-0.36865	0.0695758	0.861107	0.691667	1.07205	NA	NA	NA	0.429292	1
BCAC_OncoArray	Trans-2-hexenoylglycine levels	Inverse variance weighted	5	0.0235026	0.0240153	0.327751	-0.0235673	0.0705725	1.02378	0.976708	1.07312	NA	NA	NA	0.574017	1
BCAC_OncoArray	Trans-4-hydroxyproline levels	Inverse variance weighted	2	-0.0207267	0.0638231	0.745369	-0.14582	0.104367	0.979487	0.864313	1.11001	NA	NA	NA	0.891629	1
BCAC_OncoArray	Trans-urocanate levels	Inverse variance weighted	3	-0.00754599	0.0283836	0.790349	-0.0631778	0.0480858	0.992482	0.938777	1.04926	NA	NA	NA	0.915495	1
BCAC_OncoArray	Trans 3,4-methyleneheptanoate levels	Wald ratio	rs71373192	0.00826567	0.0789358	0.916603	-0.146448	0.16298	1.0083	0.86377	1.17701	NA	NA	NA	0.950588	1
BCAC_OncoArray	Tricosanoyl sphingomyelin (d18:1_23:0) levels	Inverse variance weighted	2	0.071885	0.0713949	0.314	-0.068049	0.211819	1.07453	0.934215	1.23592	NA	NA	NA	0.568138	1
BCAC_OncoArray	Tridecenedioate (C13:1-DC) levels	Inverse variance weighted	2	0.0285937	0.0773311	0.711564	-0.122975	0.180163	1.02901	0.884286	1.19741	NA	NA	NA	0.881773	1
BCAC_OncoArray	Tryptophan betaine levels	Inverse variance weighted	36	0.0791008	0.0116844	1.28952e-11	0.0561995	0.102002	1.08231	1.05781	1.10739	0.522133	0.504277	TRUE	2.45266e-09	1.22633e-08
BCAC_OncoArray	Tryptophan levels	Inverse variance weighted	5	0.0744933	0.0387125	0.0543208	-0.00138321	0.15037	1.07734	0.998618	1.16226	NA	NA	NA	0.202585	1
BCAC_OncoArray	tryptophan to tyrosine ratio	Inverse variance weighted	5	-0.122973	0.0452725	0.00660203	-0.211707	-0.0342386	0.884288	0.809202	0.966341	0.322622	0.538292	TRUE	0.0518887	1
BCAC_OncoArray	Tyrosine levels	Inverse variance weighted	6	0.0622291	0.0277414	0.024885	0.00785593	0.116602	1.06421	1.00789	1.12367	0.604991	0.276129	TRUE	0.126554	1
BCAC_OncoArray	Tyrosine to pyruvate ratio	Inverse variance weighted	3	0.0707522	0.0524028	0.176965	-0.0319573	0.173462	1.07332	0.968548	1.18942	NA	NA	NA	0.424983	1
BCAC_OncoArray	Undecenoylcarnitine (C11:1) levels	Inverse variance weighted	24	-0.0147079	0.0132438	0.266761	-0.0406658	0.0112499	0.9854	0.96015	1.01131	NA	NA	NA	0.5356	1
BCAC_OncoArray	Urate levels	Inverse variance weighted	18	0.0049326	0.0147429	0.737946	-0.0239635	0.0338287	1.00494	0.976321	1.03441	NA	NA	NA	0.887863	1
BCAC_OncoArray	Uridine levels	Inverse variance weighted	2	-0.00312061	0.0425693	0.941562	-0.0865563	0.0803151	0.996884	0.917084	1.08363	NA	NA	NA	0.96386	1
BCAC_OncoArray	Uridine to 2'-deoxyuridine ratio	Inverse variance weighted	3	0.0490005	0.0364336	0.178649	-0.0224094	0.12041	1.05022	0.97784	1.12796	NA	NA	NA	0.426873	1
BCAC_OncoArray	Uridine to cytidine ratio	Inverse variance weighted	2	0.0629693	0.0566008	0.265916	-0.0479683	0.173907	1.06499	0.953164	1.18994	NA	NA	NA	0.5356	1
BCAC_OncoArray	Uridine to pseudouridine ratio	Inverse variance weighted	3	-0.0772842	0.0451511	0.0869559	-0.16578	0.011212	0.925627	0.847232	1.01128	NA	NA	NA	0.276572	1
BCAC_OncoArray	Ursodeoxycholate levels	Wald ratio	rs10504255	-0.106688	0.072471	0.140982	-0.248731	0.0353553	0.898806	0.77979	1.03599	NA	NA	NA	0.372426	1
BCAC_OncoArray	Vanillactate levels	Inverse variance weighted	2	-0.00451842	0.0660313	0.945445	-0.13394	0.124903	0.995492	0.874643	1.13304	NA	NA	NA	0.966793	1
BCAC_OncoArray	Vanillic acid glycine levels	Inverse variance weighted	8	0.0503036	0.0290503	0.083344	-0.00663495	0.107242	1.05159	0.993387	1.1132	NA	NA	NA	0.269592	1
BCAC_OncoArray	Vanillic alcohol sulfate levels	Inverse variance weighted	2	-0.0109614	0.0477603	0.818474	-0.104572	0.0826487	0.989098	0.90071	1.08616	NA	NA	NA	0.925527	1
BCAC_OncoArray	Vanillylmandelate (VMA) levels	Inverse variance weighted	4	0.0295422	0.051867	0.568965	-0.0721172	0.131202	1.02998	0.930422	1.1402	NA	NA	NA	0.791644	1
BCAC_OncoArray	X-07765 levels	Inverse variance weighted	14	-0.227504	0.0400876	1.38541e-08	-0.306076	-0.148933	0.796519	0.736331	0.861627	2.53066e-05	0.404791	TRUE	1.09794e-06	1.31753e-05
BCAC_OncoArray	X-10458 levels	Inverse variance weighted	2	0.0323457	0.0532098	0.543261	-0.0719456	0.136637	1.03287	0.930582	1.14641	NA	NA	NA	0.779247	1
BCAC_OncoArray	X-11299 levels	Inverse variance weighted	2	-0.0607672	0.0575706	0.291186	-0.173606	0.0520713	0.941042	0.840628	1.05345	NA	NA	NA	0.550884	1
BCAC_OncoArray	X-11308 levels	Inverse variance weighted	11	-0.0677768	0.0182299	0.0002009	-0.103507	-0.0320461	0.934469	0.901669	0.968462	0.945383	0.521321	TRUE	0.00389222	0.191056
BCAC_OncoArray	X-11315 levels	Inverse variance weighted	7	-0.0391331	0.0335942	0.244068	-0.104978	0.0267114	0.961623	0.900345	1.02707	NA	NA	NA	0.51157	1
BCAC_OncoArray	X-11372 levels	Wald ratio	rs8041483	-0.0401511	0.0856527	0.639236	-0.20803	0.127728	0.960644	0.812182	1.13624	NA	NA	NA	0.836996	1
BCAC_OncoArray	X-11381 levels	Inverse variance weighted	20	-0.0196862	0.0276896	0.47711	-0.0739578	0.0345855	0.980506	0.928711	1.03519	NA	NA	NA	0.717929	1
BCAC_OncoArray	X-11444 levels	Inverse variance weighted	59	0.0301715	0.00958951	0.00165347	0.0113761	0.048967	1.03063	1.01144	1.05019	0.00453527	0.000508016	TRUE	0.0203797	1
BCAC_OncoArray	X-11470 levels	Inverse variance weighted	80	0.0180153	0.00841423	0.0322697	0.00152343	0.0345072	1.01818	1.00152	1.03511	0.00215322	0.656306	TRUE	0.146136	1
BCAC_OncoArray	X-11478 levels	Inverse variance weighted	10	0.0234556	0.0243206	0.334829	-0.0242128	0.071124	1.02373	0.976078	1.07371	NA	NA	NA	0.579655	1
BCAC_OncoArray	X-11787 levels	Inverse variance weighted	45	0.0111068	0.00816537	0.173758	-0.00489736	0.0271109	1.01117	0.995115	1.02748	NA	NA	NA	0.42049	1
BCAC_OncoArray	X-11795 levels	Wald ratio	rs146276253	0.0522364	0.0717742	0.466744	-0.088441	0.192914	1.05362	0.915357	1.21278	NA	NA	NA	0.710197	1
BCAC_OncoArray	X-11849 levels	Wald ratio	rs165722	0.0160795	0.0644427	0.802961	-0.110228	0.142387	1.01621	0.89563	1.15302	NA	NA	NA	0.918912	1
BCAC_OncoArray	X-11852 levels	Wald ratio	rs140587970	-0.136737	0.0882726	0.121375	-0.309751	0.0362776	0.8722	0.73363	1.03694	NA	NA	NA	0.341502	1
BCAC_OncoArray	X-11880 levels	Wald ratio	rs13410335	-0.0262786	0.0735701	0.720948	-0.170476	0.117919	0.974064	0.843263	1.12515	NA	NA	NA	0.887863	1
BCAC_OncoArray	X-12007 levels	Wald ratio	rs1531022	-0.0247465	0.091253	0.786249	-0.203602	0.154109	0.975557	0.815787	1.16662	NA	NA	NA	0.913492	1
BCAC_OncoArray	X-12026 levels	Inverse variance weighted	2	0.0456535	0.0683512	0.504182	-0.0883149	0.179622	1.04671	0.915473	1.19676	NA	NA	NA	0.743375	1
BCAC_OncoArray	X-12100 levels	Inverse variance weighted	6	-0.135334	0.0686109	0.0485547	-0.269811	-0.000856324	0.873424	0.763524	0.999144	0.000180906	0.115719	TRUE	0.184917	1
BCAC_OncoArray	X-12101 levels	Inverse variance weighted	5	0.0183616	0.0256133	0.473449	-0.0318405	0.0685637	1.01853	0.968661	1.07097	NA	NA	NA	0.713799	1
BCAC_OncoArray	X-12112 levels	Inverse variance weighted	81	-0.00382171	0.00492048	0.43734	-0.0134659	0.00582244	0.996186	0.986624	1.00584	NA	NA	NA	0.677378	1
BCAC_OncoArray	X-12117 levels	Inverse variance weighted	10	-0.0449422	0.0192642	0.0196511	-0.0826999	-0.00718444	0.956053	0.920627	0.992841	0.548061	0.338771	TRUE	0.110213	1
BCAC_OncoArray	X-12127 levels	Inverse variance weighted	2	-0.136104	0.0592275	0.0215623	-0.25219	-0.0200184	0.872752	0.777097	0.980181	0.894539	NA	TRUE	0.115769	1
BCAC_OncoArray	X-12216 levels	Inverse variance weighted	4	-0.0923123	0.0392274	0.0186096	-0.169198	-0.0154266	0.91182	0.844342	0.984692	0.611164	0.671104	TRUE	0.107153	1
BCAC_OncoArray	X-12410 levels	Inverse variance weighted	4	0.0605339	0.0280747	0.03107	0.00550754	0.11556	1.0624	1.00552	1.1225	0.521817	0.940775	TRUE	0.142056	1
BCAC_OncoArray	X-12411 levels	Inverse variance weighted	6	0.0167063	0.0490829	0.733579	-0.0794962	0.112909	1.01685	0.923582	1.11953	NA	NA	NA	0.887863	1
BCAC_OncoArray	X-12544 levels	Wald ratio	rs74150870	-0.112656	0.0767614	0.14221	-0.263108	0.0377966	0.893458	0.768659	1.03852	NA	NA	NA	0.373597	1
BCAC_OncoArray	X-12701 levels	Wald ratio	rs1960773	0.0108051	0.0727864	0.881988	-0.131856	0.153466	1.01086	0.876467	1.16587	NA	NA	NA	0.93752	1
BCAC_OncoArray	X-12707 levels	Inverse variance weighted	26	0.0154701	0.0170717	0.364839	-0.0179904	0.0489306	1.01559	0.98217	1.05015	NA	NA	NA	0.608842	1
BCAC_OncoArray	X-12714 levels	Inverse variance weighted	7	0.0367731	0.0198178	0.063516	-0.00206973	0.075616	1.03746	0.997932	1.07855	NA	NA	NA	0.229672	1
BCAC_OncoArray	X-12798 levels	Inverse variance weighted	51	-0.0208496	0.0077414	0.00707565	-0.0360228	-0.00567648	0.979366	0.964618	0.99434	0.0155185	0.659174	TRUE	0.0545182	1
BCAC_OncoArray	X-12822 levels	Inverse variance weighted	17	-0.035124	0.016117	0.029308	-0.0667132	-0.00353475	0.965486	0.935463	0.996471	0.125407	0.0348309	TRUE	0.14006	1
BCAC_OncoArray	X-12839 levels	Wald ratio	rs4409177	-0.0929632	0.0621239	0.134545	-0.214726	0.0287995	0.911227	0.806762	1.02922	NA	NA	NA	0.362471	1
BCAC_OncoArray	X-12844 levels	Inverse variance weighted	15	0.0210942	0.0171911	0.219805	-0.0126002	0.0547887	1.02132	0.987479	1.05632	NA	NA	NA	0.488399	1
BCAC_OncoArray	X-12847 levels	Inverse variance weighted	4	-0.0613783	0.0370915	0.0979688	-0.134078	0.011321	0.940467	0.874522	1.01139	NA	NA	NA	0.299627	1
BCAC_OncoArray	X-12851 levels	Inverse variance weighted	2	-0.00486317	0.0628368	0.93831	-0.128023	0.118297	0.995149	0.879833	1.12558	NA	NA	NA	0.961566	1
BCAC_OncoArray	X-13431 levels	Inverse variance weighted	71	0.0106245	0.00610682	0.0818973	-0.00134483	0.0225939	1.01068	0.998656	1.02285	NA	NA	NA	0.265817	1
BCAC_OncoArray	X-13553 levels	Inverse variance weighted	2	0.179788	0.0756951	0.017541	0.0314261	0.328151	1.19696	1.03193	1.3884	0.487545	NA	TRUE	0.103612	1
BCAC_OncoArray	X-13684 levels	Inverse variance weighted	11	-0.0363853	0.0203924	0.0743816	-0.0763545	0.00358378	0.964269	0.926488	1.00359	NA	NA	NA	0.252632	1
BCAC_OncoArray	X-13866 levels	Inverse variance weighted	15	-0.0328479	0.0179	0.0664943	-0.0679319	0.00223612	0.967686	0.934324	1.00224	NA	NA	NA	0.235955	1
BCAC_OncoArray	X-14939 levels	Inverse variance weighted	6	-0.0351112	0.0227465	0.122689	-0.0796944	0.009472	0.965498	0.923399	1.00952	NA	NA	NA	0.343757	1
BCAC_OncoArray	X-15461 levels	Wald ratio	rs541273	0.00949251	0.0936052	0.919225	-0.173974	0.192959	1.00954	0.840319	1.21283	NA	NA	NA	0.951233	1
BCAC_OncoArray	X-15486 levels	Inverse variance weighted	10	-0.0845086	0.0215584	8.85534e-05	-0.126763	-0.0422542	0.918964	0.880942	0.958626	0.801411	0.187779	TRUE	0.00224672	0.0842142
BCAC_OncoArray	X-15503 levels	Inverse variance weighted	6	-0.0413792	0.0347198	0.233338	-0.10943	0.0266716	0.959465	0.896345	1.02703	NA	NA	NA	0.50779	1
BCAC_OncoArray	X-15523 levels	Inverse variance weighted	6	0.00184186	0.00339497	0.587456	-0.00481227	0.00849599	1.00184	0.995199	1.00853	NA	NA	NA	0.803842	1
BCAC_OncoArray	X-16087 levels	Inverse variance weighted	20	0.0613534	0.0196635	0.00180749	0.0228129	0.0998938	1.06327	1.02308	1.10505	0.00904638	0.874261	TRUE	0.0204633	1
BCAC_OncoArray	X-16397 levels	Inverse variance weighted	5	-0.08957	0.0365119	0.0141603	-0.161133	-0.0180066	0.914324	0.851179	0.982155	0.285328	0.317021	TRUE	0.0909896	1
BCAC_OncoArray	X-16935 levels	Inverse variance weighted	14	-0.0163074	0.014541	0.262083	-0.0448077	0.0121929	0.983825	0.956181	1.01227	NA	NA	NA	0.53555	1
BCAC_OncoArray	X-17010 levels	Wald ratio	rs174564	0.0921539	0.0828726	0.266141	-0.0702765	0.254584	1.09653	0.932136	1.28993	NA	NA	NA	0.5356	1
BCAC_OncoArray	X-17325 levels	Inverse variance weighted	2	0.0481562	0.0382725	0.208303	-0.0268579	0.12317	1.04933	0.9735	1.13108	NA	NA	NA	0.469423	1
BCAC_OncoArray	X-17357 levels	Inverse variance weighted	11	0.0104391	0.0212393	0.623072	-0.0311899	0.0520682	1.01049	0.969291	1.05345	NA	NA	NA	0.824895	1
BCAC_OncoArray	X-17367 levels	Inverse variance weighted	3	0.0291923	0.0290422	0.314815	-0.0277304	0.086115	1.02962	0.972651	1.08993	NA	NA	NA	0.568138	1
BCAC_OncoArray	X-17653 levels	Inverse variance weighted	9	-0.0394529	0.02117	0.0623745	-0.0809461	0.00204028	0.961315	0.922243	1.00204	NA	NA	NA	0.226405	1
BCAC_OncoArray	X-17654 levels	Inverse variance weighted	24	-0.0392976	0.0105832	0.000204638	-0.0600406	-0.0185546	0.961465	0.941726	0.981616	0.98641	0.908748	TRUE	0.00389222	0.194611
BCAC_OncoArray	X-17676 levels	Inverse variance weighted	4	0.048286	0.033177	0.145557	-0.0167409	0.113313	1.04947	0.983398	1.11998	NA	NA	NA	0.377468	1
BCAC_OncoArray	X-17685 levels	Wald ratio	rs1165150	0.154857	0.0866289	0.0738421	-0.0149357	0.32465	1.16749	0.985175	1.38355	NA	NA	NA	0.251898	1
BCAC_OncoArray	X-17690 levels	Inverse variance weighted	29	-0.223825	0.0252759	8.34778e-19	-0.273366	-0.174284	0.799455	0.760814	0.840058	1.24913e-06	0.368344	TRUE	1.98468e-16	7.93874e-16
BCAC_OncoArray	X-18886 levels	Inverse variance weighted	2	0.205221	0.124029	0.0980012	-0.0378757	0.448317	1.2278	0.962833	1.56568	NA	NA	NA	0.299627	1
BCAC_OncoArray	X-18888 levels	Inverse variance weighted	4	0.0124332	0.0419667	0.767028	-0.0698215	0.0946879	1.01251	0.93256	1.09932	NA	NA	NA	0.906603	1
BCAC_OncoArray	X-18913 levels	Inverse variance weighted	3	0.073755	0.0401163	0.0659846	-0.00487299	0.152383	1.07654	0.995139	1.16461	NA	NA	NA	0.235024	1
BCAC_OncoArray	X-18921 levels	Inverse variance weighted	21	-0.011122	0.0114245	0.330292	-0.0335141	0.01127	0.98894	0.967041	1.01133	NA	NA	NA	0.575288	1
BCAC_OncoArray	X-18922 levels	Inverse variance weighted	7	0.00692361	0.0396665	0.861437	-0.0708227	0.0846699	1.00695	0.931627	1.08836	NA	NA	NA	0.93752	1
BCAC_OncoArray	X-18935 levels	Wald ratio	rs56113850	-0.0712128	0.0643767	0.268645	-0.197391	0.0549656	0.931264	0.820869	1.0565	NA	NA	NA	0.5356	1
BCAC_OncoArray	X-19141 levels	Inverse variance weighted	133	0.0128682	0.00851315	0.130643	-0.00381755	0.029554	1.01295	0.99619	1.03	NA	NA	NA	0.355993	1
BCAC_OncoArray	X-19438 levels	Wald ratio	rs7866466	-0.0360492	0.0886998	0.684435	-0.209901	0.137802	0.964593	0.810665	1.14775	NA	NA	NA	0.865693	1
BCAC_OncoArray	X-21258 levels	Inverse variance weighted	7	-0.0785817	0.0208981	0.000169759	-0.119542	-0.0376214	0.924427	0.887327	0.963078	0.999863	0.924254	TRUE	0.00343491	0.161441
BCAC_OncoArray	X-21283 levels	Inverse variance weighted	13	-0.0166449	0.0122371	0.173767	-0.0406296	0.00733983	0.983493	0.960185	1.00737	NA	NA	NA	0.42049	1
BCAC_OncoArray	X-21285 levels	Inverse variance weighted	19	-0.191669	0.0360237	1.03403e-07	-0.262276	-0.121063	0.82558	0.769299	0.885978	4.36272e-08	0.0133273	TRUE	7.02399e-06	9.83359e-05
BCAC_OncoArray	X-21286 levels	Inverse variance weighted	4	0.0388349	0.0603244	0.519726	-0.079401	0.157071	1.0396	0.923669	1.17008	NA	NA	NA	0.760399	1
BCAC_OncoArray	X-21310 levels	Wald ratio	rs146593209	-0.0274684	0.0903625	0.761143	-0.204579	0.149642	0.972905	0.81499	1.16142	NA	NA	NA	0.903807	1
BCAC_OncoArray	X-21312 levels	Inverse variance weighted	31	-0.244216	0.013991	3.14428e-68	-0.271638	-0.216794	0.783318	0.76213	0.805096	0.3157	0.00318395	TRUE	2.99021e-65	2.99021e-65
BCAC_OncoArray	X-21319 levels	Inverse variance weighted	3	-0.0116301	0.0514476	0.821156	-0.112467	0.0892071	0.988437	0.893626	1.09331	NA	NA	NA	0.926723	1
BCAC_OncoArray	X-21353 levels	Inverse variance weighted	7	-0.0112061	0.0236779	0.636019	-0.0576148	0.0352026	0.988856	0.944014	1.03583	NA	NA	NA	0.834282	1
BCAC_OncoArray	X-21364 levels	Inverse variance weighted	4	0.125865	0.0394923	0.0014372	0.04846	0.20327	1.13413	1.04965	1.2254	0.691051	0.406881	TRUE	0.0182841	1
BCAC_OncoArray	X-21383 levels	Wald ratio	rs137909323	-0.0916949	0.0900244	0.308413	-0.268143	0.0847528	0.912383	0.764799	1.08845	NA	NA	NA	0.568138	1
BCAC_OncoArray	X-21441 levels	Inverse variance weighted	22	-0.00940984	0.0115586	0.415587	-0.0320646	0.0132449	0.990634	0.968444	1.01333	NA	NA	NA	0.652836	1
BCAC_OncoArray	X-21442 levels	Inverse variance weighted	2	0.107498	0.0749674	0.151592	-0.039438	0.254434	1.11349	0.96133	1.28973	NA	NA	NA	0.385465	1
BCAC_OncoArray	X-21467 levels	Inverse variance weighted	16	0.0118962	0.0151835	0.433335	-0.0178634	0.0416559	1.01197	0.982295	1.04254	NA	NA	NA	0.67227	1
BCAC_OncoArray	X-21470 levels	Inverse variance weighted	13	-0.0934718	0.031114	0.00266304	-0.154455	-0.0324884	0.910764	0.856882	0.968034	0.0010577	0.478865	TRUE	0.0250748	1
BCAC_OncoArray	X-21471 levels	Inverse variance weighted	23	-0.0069959	0.0116388	0.547783	-0.0298079	0.0158161	0.993029	0.970632	1.01594	NA	NA	NA	0.782195	1
BCAC_OncoArray	X-21607 levels	Inverse variance weighted	23	-0.018666	0.0105306	0.076304	-0.0393061	0.00197401	0.981507	0.961456	1.00198	NA	NA	NA	0.257323	1
BCAC_OncoArray	X-21733 levels	Inverse variance weighted	3	0.00767362	0.0490727	0.875739	-0.0885088	0.103856	1.0077	0.915295	1.10944	NA	NA	NA	0.93752	1
BCAC_OncoArray	X-21736 levels	Inverse variance weighted	3	0.0937983	0.146616	0.522332	-0.193569	0.381166	1.09834	0.824013	1.46399	NA	NA	NA	0.763038	1
BCAC_OncoArray	X-21796 levels	Inverse variance weighted	2	-0.022243	0.0374937	0.553016	-0.0957306	0.0512446	0.978003	0.908709	1.05258	NA	NA	NA	0.783783	1
BCAC_OncoArray	X-21821 levels	Wald ratio	rs1133607	-0.0498831	0.0873134	0.567789	-0.221017	0.121251	0.951341	0.801703	1.12891	NA	NA	NA	0.791644	1
BCAC_OncoArray	X-21829 levels	Inverse variance weighted	8	-0.0512282	0.0569966	0.368763	-0.162942	0.0604852	0.950062	0.849641	1.06235	NA	NA	NA	0.608842	1
BCAC_OncoArray	X-21834 levels	Inverse variance weighted	6	-0.109272	0.0281526	0.00010385	-0.164451	-0.054093	0.896486	0.848359	0.947344	0.999048	0.76378	TRUE	0.00240881	0.098761
BCAC_OncoArray	X-22162 levels	Inverse variance weighted	12	-0.019962	0.0131623	0.129366	-0.04576	0.00583604	0.980236	0.955271	1.00585	NA	NA	NA	0.355569	1
BCAC_OncoArray	X-22520 levels	Inverse variance weighted	2	-0.0738196	0.0612315	0.227979	-0.193833	0.0461941	0.928839	0.823795	1.04728	NA	NA	NA	0.50071	1
BCAC_OncoArray	X-23276 levels	Wald ratio	rs72684411	-0.0151168	0.0687616	0.825993	-0.14989	0.119656	0.984997	0.860803	1.12711	NA	NA	NA	0.928513	1
BCAC_OncoArray	X-23639 levels	Inverse variance weighted	3	0.125829	0.0565727	0.0261345	0.0149469	0.236712	1.13409	1.01506	1.26708	0.235715	0.351982	TRUE	0.131502	1
BCAC_OncoArray	X-23641 levels	Inverse variance weighted	12	-0.021729	0.0209661	0.30002	-0.0628225	0.0193645	0.978505	0.93911	1.01955	NA	NA	NA	0.563872	1
BCAC_OncoArray	X-23644 levels	Inverse variance weighted	3	-0.0391608	0.041951	0.350567	-0.121385	0.0430632	0.961596	0.885693	1.044	NA	NA	NA	0.597473	1
BCAC_OncoArray	X-23654 levels	Inverse variance weighted	10	0.0446982	0.019861	0.024414	0.00577063	0.0836258	1.04571	1.00579	1.08722	0.336809	0.520457	TRUE	0.124827	1
BCAC_OncoArray	X-23659 levels	Inverse variance weighted	10	-0.0373318	0.0220334	0.0902025	-0.0805173	0.0058536	0.963356	0.922639	1.00587	NA	NA	NA	0.28218	1
BCAC_OncoArray	X-23678 levels	Wald ratio	rs72720588	-0.131357	0.0724677	0.0698904	-0.273393	0.0106802	0.876905	0.760794	1.01074	NA	NA	NA	0.243974	1
BCAC_OncoArray	X-23680 levels	Inverse variance weighted	13	0.00183342	0.0155593	0.906199	-0.0286628	0.0323296	1.00184	0.971744	1.03286	NA	NA	NA	0.942883	1
BCAC_OncoArray	X-23739 levels	Inverse variance weighted	14	-0.023911	0.0188482	0.204581	-0.0608535	0.0130315	0.976373	0.940961	1.01312	NA	NA	NA	0.465447	1
BCAC_OncoArray	X-23780 levels	Inverse variance weighted	11	-0.0232399	0.0204635	0.256092	-0.0633484	0.0168685	0.977028	0.938616	1.01701	NA	NA	NA	0.528294	1
BCAC_OncoArray	X-23974 levels	Wald ratio	rs1075485	-0.0301726	0.0736928	0.682219	-0.174611	0.114265	0.970278	0.839784	1.12105	NA	NA	NA	0.865053	1
BCAC_OncoArray	X-23997 levels	Wald ratio	rs17455169	0.0302119	0.0896398	0.736089	-0.145482	0.205906	1.03067	0.864605	1.22864	NA	NA	NA	0.887863	1
BCAC_OncoArray	X-24241 levels	Inverse variance weighted	9	-0.0691511	0.0432913	0.110189	-0.154002	0.0156999	0.933186	0.85727	1.01582	NA	NA	NA	0.323425	1
BCAC_OncoArray	X-24243 levels	Inverse variance weighted	7	0.0225183	0.0309379	0.466702	-0.03812	0.0831566	1.02277	0.962597	1.08671	NA	NA	NA	0.710197	1
BCAC_OncoArray	X-24328 levels	Inverse variance weighted	18	-0.175675	0.0187659	7.86768e-21	-0.212457	-0.138894	0.83889	0.808595	0.87032	0.701451	0.319468	TRUE	2.49405e-18	7.48216e-18
BCAC_OncoArray	X-24334 levels	Inverse variance weighted	2	0.0635619	0.0408393	0.119615	-0.0164832	0.143607	1.06563	0.983652	1.15443	NA	NA	NA	0.339565	1
BCAC_OncoArray	X-24337 levels	Inverse variance weighted	6	0.0122817	0.0229733	0.592921	-0.032746	0.0573095	1.01236	0.967784	1.05898	NA	NA	NA	0.808993	1
BCAC_OncoArray	X-24418 levels	Inverse variance weighted	24	0.00989288	0.00986406	0.315899	-0.00944068	0.0292264	1.00994	0.990604	1.02966	NA	NA	NA	0.568138	1
BCAC_OncoArray	X-24494 levels	Inverse variance weighted	32	-0.0788551	0.0126125	4.04904e-10	-0.103576	-0.0541345	0.924174	0.901608	0.947305	0.322653	0.74329	TRUE	5.50091e-08	3.85064e-07
BCAC_OncoArray	X-24518 levels	Inverse variance weighted	24	0.0218168	0.0101122	0.0309696	0.00199679	0.0416368	1.02206	1.002	1.04252	0.427573	0.921943	TRUE	0.142056	1
BCAC_OncoArray	X-24531 levels	Inverse variance weighted	6	0.0674784	0.0260134	0.00948688	0.0164922	0.118465	1.06981	1.01663	1.12577	0.300028	0.30338	TRUE	0.0684992	1
BCAC_OncoArray	X-24544 levels	Inverse variance weighted	38	-0.0448809	0.0114773	9.21367e-05	-0.0673763	-0.0223855	0.956111	0.934843	0.977863	0.0044164	0.365133	TRUE	0.00224672	0.087622
BCAC_OncoArray	X-24546 levels	Inverse variance weighted	11	-0.023465	0.0178498	0.188651	-0.0584507	0.0115206	0.976808	0.943225	1.01159	NA	NA	NA	0.439724	1
BCAC_OncoArray	X-24556 levels	Inverse variance weighted	17	0.0384452	0.0180368	0.0330494	0.003093	0.0737974	1.03919	1.0031	1.07659	0.146438	0.391285	TRUE	0.148846	1
BCAC_OncoArray	X-24585 levels	Wald ratio	rs2997922	-0.078759	0.0785646	0.316114	-0.232746	0.0752275	0.924263	0.792355	1.07813	NA	NA	NA	0.568138	1
BCAC_OncoArray	X-24588 levels	Inverse variance weighted	28	0.0173303	0.0128082	0.176034	-0.00777369	0.0424344	1.01748	0.992256	1.04335	NA	NA	NA	0.423818	1
BCAC_OncoArray	X-24736 levels	Inverse variance weighted	12	0.0262398	0.0126907	0.0386739	0.00136602	0.0511135	1.02659	1.00137	1.05244	0.866962	0.399386	TRUE	0.162022	1
BCAC_OncoArray	X-24757 levels	Wald ratio	rs1047891	0.0605166	0.0673305	0.368759	-0.0714512	0.192484	1.06239	0.931042	1.21226	NA	NA	NA	0.608842	1
BCAC_OncoArray	X-24795 levels	Wald ratio	rs1047891	0.0454684	0.0505879	0.368759	-0.0536839	0.144621	1.04652	0.947732	1.1556	NA	NA	NA	0.608842	1
BCAC_OncoArray	X-24801 levels	Inverse variance weighted	15	0.00377322	0.0343386	0.912502	-0.0635305	0.0710769	1.00378	0.938446	1.07366	NA	NA	NA	0.948404	1
BCAC_OncoArray	X-24812 levels	Wald ratio	rs1171617	0.0399695	0.0780796	0.608716	-0.113066	0.193006	1.04078	0.893091	1.21289	NA	NA	NA	0.817639	1
BCAC_OncoArray	X-24947 levels	Inverse variance weighted	66	0.0268984	0.00860778	0.00177867	0.0100272	0.0437697	1.02726	1.01008	1.04474	0.0183378	0.0915675	TRUE	0.0203797	1
BCAC_OncoArray	X-24949 levels	Inverse variance weighted	17	-0.0520354	0.0141374	0.000232591	-0.0797447	-0.0243262	0.949295	0.923352	0.975967	0.826011	0.0333192	TRUE	0.00433714	0.221194
BCAC_OncoArray	X-24978 levels	Wald ratio	rs603424	-0.00329342	0.0558064	0.95294	-0.112674	0.106087	0.996712	0.893442	1.11192	NA	NA	NA	0.968212	1
BCAC_OncoArray	X-25109 levels	Inverse variance weighted	5	0.0495161	0.0265606	0.0622844	-0.00254276	0.101575	1.05076	0.99746	1.10691	NA	NA	NA	0.226405	1
BCAC_OncoArray	X-25371 levels	Inverse variance weighted	14	0.049874	0.025514	0.0506109	-0.000133574	0.0998815	1.05114	0.999866	1.10504	NA	NA	NA	0.19116	1
BCAC_OncoArray	X-25422 levels	Inverse variance weighted	17	0.0044279	0.0182522	0.808319	-0.0313463	0.0402021	1.00444	0.96914	1.04102	NA	NA	NA	0.919379	1
BCAC_OncoArray	X-25433 levels	Inverse variance weighted	6	0.00519787	0.0322528	0.871967	-0.0580176	0.0684134	1.00521	0.943633	1.07081	NA	NA	NA	0.93752	1
BCAC_OncoArray	X-25790 levels	Inverse variance weighted	2	0.109865	0.0867905	0.205563	-0.0602446	0.279974	1.11613	0.941534	1.3231	NA	NA	NA	0.466563	1
BCAC_OncoArray	X-25810 levels	Inverse variance weighted	4	-0.0742518	0.0421987	0.0784797	-0.156961	0.00845762	0.928438	0.854737	1.00849	NA	NA	NA	0.260281	1
BCAC_OncoArray	X-26054 levels	Inverse variance weighted	30	-0.0137554	0.00965386	0.154199	-0.0326769	0.00516621	0.986339	0.967851	1.00518	NA	NA	NA	0.390009	1
BCAC_OncoArray	X-26109 levels	Inverse variance weighted	51	0.00380845	0.00544903	0.4846	-0.00687164	0.0144885	1.00382	0.993152	1.01459	NA	NA	NA	0.723477	1
BCAC_OncoArray	X-26111 levels	Inverse variance weighted	5	-0.00667435	0.0261594	0.798614	-0.0579467	0.044598	0.993348	0.9437	1.04561	NA	NA	NA	0.917901	1
BCAC_OncoArray	Xanthurenate levels	Inverse variance weighted	7	-0.0512092	0.027664	0.0641533	-0.105431	0.00301226	0.95008	0.899937	1.00302	NA	NA	NA	0.231098	1
BCAC_OncoArray	Ximenoylcarnitine (C26:1) levels	Inverse variance weighted	21	-0.0276121	0.0201754	0.171122	-0.0671558	0.0119316	0.972766	0.93505	1.012	NA	NA	NA	0.420084	1

## Sheet: Sheet3
Table S3 The significant associations between plasma metabolites and BC risk (BCAC iCOGS)
outcome	exposure	method	nsnp	b	se	pval	lo_ci	up_ci	or	or_lci95	or_uci95	het_Qval	pleio_pval	direction	FDR
BCAC_iCOGS	(2 or 3)-decenoate (10:1n7 or n8) levels	Inverse variance weighted	5	0.00761214	0.0524901	0.884695	-0.0952685	0.110493	1.00764	0.909129	1.11683	NA	NA	NA	0.964116
BCAC_iCOGS	(N(1) + N(8))-acetylspermidine levels	Inverse variance weighted	24	0.0270265	0.0188659	0.151985	-0.00995073	0.0640037	1.0274	0.990099	1.0661	NA	NA	NA	0.46738
BCAC_iCOGS	(R)-3-hydroxybutyrylcarnitine levels	Inverse variance weighted	2	-0.0875013	0.170209	0.607194	-0.42111	0.246108	0.916218	0.656318	1.27904	NA	NA	NA	0.846365
BCAC_iCOGS	(S)-3-hydroxybutyrylcarnitine levels	Inverse variance weighted	6	-0.0334126	0.0540963	0.536806	-0.139441	0.0726162	0.967139	0.869844	1.07532	NA	NA	NA	0.819969
BCAC_iCOGS	(S)-a-amino-omega-caprolactam levels	Inverse variance weighted	3	-0.0437383	0.0755309	0.562537	-0.191779	0.104302	0.957204	0.825489	1.10994	NA	NA	NA	0.822367
BCAC_iCOGS	1-(1-enyl-palmitoyl)-2-arachidonoyl-gpc (p-16:0_20:4) levels	Inverse variance weighted	26	0.00199439	0.0172202	0.907797	-0.0317571	0.0357459	1.002	0.968742	1.03639	NA	NA	NA	0.96695
BCAC_iCOGS	1-(1-enyl-palmitoyl)-2-arachidonoyl-GPE (p-16:0_20:4) levels	Wald ratio	rs3826884	-0.0587827	0.0803871	0.464629	-0.216341	0.098776	0.942912	0.80546	1.10382	NA	NA	NA	0.785966
BCAC_iCOGS	1-(1-enyl-palmitoyl)-2-linoleoyl-GPC (p-16:0_18:2) levels	Inverse variance weighted	3	0.0634956	0.0878176	0.469656	-0.108627	0.235618	1.06555	0.897065	1.26569	NA	NA	NA	0.787967
BCAC_iCOGS	1-(1-enyl-palmitoyl)-2-linoleoyl-GPE (p-16:0_18:2) levels	Inverse variance weighted	3	0.000423704	0.0527166	0.993587	-0.102901	0.103748	1.00042	0.902216	1.10932	NA	NA	NA	0.997749
BCAC_iCOGS	1-(1-enyl-palmitoyl)-2-oleoyl-gpc (p-16:0_18:1) levels	Inverse variance weighted	5	0.0229467	0.0567085	0.68574	-0.088202	0.134095	1.02321	0.915576	1.1435	NA	NA	NA	0.876545
BCAC_iCOGS	1-(1-enyl-palmitoyl)-2-oleoyl-GPE (p-16:0_18:1) levels	Wald ratio	rs3826886	-0.184826	0.110004	0.0929241	-0.400434	0.0307824	0.831249	0.670029	1.03126	NA	NA	NA	0.355037
BCAC_iCOGS	1-(1-enyl-palmitoyl)-2-palmitoleoyl-GPC (P-16:0_16:1) levels	Inverse variance weighted	20	0.0424373	0.0266881	0.111807	-0.00987134	0.0947459	1.04335	0.990177	1.09938	NA	NA	NA	0.404616
BCAC_iCOGS	1-(1-enyl-palmitoyl)-2-palmitoyl-GPC (P-16:0_16:0) levels	Inverse variance weighted	24	0.0263265	0.0217384	0.225872	-0.0162808	0.0689339	1.02668	0.983851	1.07137	NA	NA	NA	0.567046
BCAC_iCOGS	1-(1-enyl-palmitoyl)-GPC (p-16:0) levels	Inverse variance weighted	4	0.126654	0.083268	0.128248	-0.0365508	0.28986	1.13502	0.964109	1.33624	NA	NA	NA	0.424104
BCAC_iCOGS	1-(1-enyl-palmitoyl)-GPE (p-16:0) levels	Inverse variance weighted	3	0.111298	0.164591	0.498908	-0.211301	0.433897	1.11773	0.80953	1.54326	NA	NA	NA	0.797422
BCAC_iCOGS	1-(1-enyl-stearoyl)-2-arachidonoyl-GPE (p-18:0_20:4) levels	Inverse variance weighted	12	0.0140529	0.0319056	0.659609	-0.048482	0.0765879	1.01415	0.952674	1.0796	NA	NA	NA	0.868052
BCAC_iCOGS	1-(1-enyl-stearoyl)-2-linoleoyl-GPE (p-18:0_18:2) levels	Inverse variance weighted	4	-0.0679339	0.0466705	0.145501	-0.159408	0.0235402	0.934322	0.852648	1.02382	NA	NA	NA	0.460267
BCAC_iCOGS	1-(1-enyl-stearoyl)-2-oleoyl-GPE (p-18:0_18:1) levels	Wald ratio	rs141622900	-0.0699458	0.0975093	0.473173	-0.261064	0.121172	0.932444	0.770232	1.12882	NA	NA	NA	0.789171
BCAC_iCOGS	1-(1-enyl-stearoyl)-GPE (p-18:0) levels	Inverse variance weighted	3	0.169255	0.104431	0.105073	-0.0354291	0.373939	1.18442	0.965191	1.45345	NA	NA	NA	0.386074
BCAC_iCOGS	1-arachidonoyl-gpc (20:4n6) levels	Inverse variance weighted	26	-0.00168792	0.0153794	0.912606	-0.0318316	0.0284557	0.998314	0.96867	1.02886	NA	NA	NA	0.96706
BCAC_iCOGS	1-arachidonoyl-GPE (20:4n6) levels	Inverse variance weighted	17	-0.00748067	0.0197635	0.705052	-0.0462171	0.0312557	0.992547	0.954835	1.03175	NA	NA	NA	0.888723
BCAC_iCOGS	1-arachidonylglycerol (20:4) levels	Inverse variance weighted	9	0.0268139	0.0342419	0.433584	-0.0403002	0.093928	1.02718	0.960501	1.09848	NA	NA	NA	0.765003
BCAC_iCOGS	1-dihomo-linolenylglycerol (20:3) levels	Wald ratio	rs1895342	0.0537854	0.115235	0.640683	-0.172076	0.279647	1.05526	0.841915	1.32266	NA	NA	NA	0.862943
BCAC_iCOGS	1-lignoceroyl-GPC (24:0) levels	Wald ratio	rs174560	-0.0138728	0.0837963	0.868508	-0.178114	0.150368	0.986223	0.836847	1.16226	NA	NA	NA	0.951884
BCAC_iCOGS	1-linolenoyl-GPC (18:3) levels	Inverse variance weighted	3	0.188279	0.142622	0.186793	-0.0912603	0.467818	1.20717	0.91278	1.59651	NA	NA	NA	0.516074
BCAC_iCOGS	1-linoleoyl-2-arachidonoyl-GPC (18:2_20:4n6) levels	Inverse variance weighted	19	-0.0499474	0.0223977	0.025746	-0.0938469	-0.00604788	0.951279	0.910422	0.99397	0.275344	0.941841	TRUE	0.150551
BCAC_iCOGS	1-linoleoyl-2-linolenoyl-GPC (18:2_18:3) levels	Inverse variance weighted	3	-0.0185654	0.0414427	0.65417	-0.099793	0.0626622	0.981606	0.905025	1.06467	NA	NA	NA	0.868052
BCAC_iCOGS	1-linoleoyl-gpc (18:2) levels	Inverse variance weighted	3	0.159417	0.098601	0.105924	-0.0338412	0.352675	1.17283	0.966725	1.42287	NA	NA	NA	0.386241
BCAC_iCOGS	1-linoleoyl-GPE (18:2) levels	Inverse variance weighted	7	0.0465279	0.0488235	0.340599	-0.0491661	0.142222	1.04763	0.952023	1.15283	NA	NA	NA	0.689458
BCAC_iCOGS	1-linoleoyl-GPG (18:2) levels	Inverse variance weighted	2	0.0613557	0.0259919	0.0182468	0.0104116	0.1123	1.06328	1.01047	1.11885	0.749282	NA	TRUE	0.121113
BCAC_iCOGS	1-linoleoyl-GPI (18:2) levels	Inverse variance weighted	2	-0.0397937	0.0503319	0.429162	-0.138444	0.0588568	0.960988	0.870712	1.06062	NA	NA	NA	0.765003
BCAC_iCOGS	1-methyl-4-imidazoleacetate levels	Wald ratio	rs555044	-0.017064	0.0784324	0.82777	-0.170792	0.136664	0.983081	0.842997	1.14644	NA	NA	NA	0.929032
BCAC_iCOGS	1-methyl-5-imidazoleacetate levels	Wald ratio	rs7094385	-0.108841	0.112727	0.334279	-0.329786	0.112103	0.896873	0.719078	1.11863	NA	NA	NA	0.687926
BCAC_iCOGS	1-methylhistidine levels	Inverse variance weighted	9	-0.0385706	0.0325259	0.235685	-0.102321	0.0251802	0.962164	0.902739	1.0255	NA	NA	NA	0.582223
BCAC_iCOGS	1-methylnicotinamide levels	Wald ratio	rs3798167	-0.0879737	0.115018	0.444349	-0.313409	0.137461	0.915785	0.730951	1.14736	NA	NA	NA	0.774782
BCAC_iCOGS	1-methylxanthine levels	Inverse variance weighted	15	-0.00715568	0.0267506	0.789088	-0.0595869	0.0452756	0.99287	0.942154	1.04632	NA	NA	NA	0.913931
BCAC_iCOGS	1-myristoyl-2-arachidonoyl-GPC (14:0_20:4) levels	Inverse variance weighted	17	-0.0133513	0.0258875	0.606034	-0.0640908	0.0373882	0.986737	0.93792	1.0381	NA	NA	NA	0.846365
BCAC_iCOGS	1-oleoyl-2-arachidonoyl-GPE (18:1_20:4) levels	Inverse variance weighted	19	0.0163834	0.0236104	0.487741	-0.029893	0.0626597	1.01652	0.970549	1.06466	NA	NA	NA	0.792786
BCAC_iCOGS	1-oleoyl-2-docosahexaenoyl-GPC (18:1_22:6) levels	Inverse variance weighted	7	0.0296012	0.0645364	0.646468	-0.0968902	0.156092	1.03004	0.907656	1.16893	NA	NA	NA	0.868052
BCAC_iCOGS	1-oleoyl-2-linoleoyl-GPE (18:1_18:2) levels	Inverse variance weighted	19	0.0086981	0.021353	0.683752	-0.0331537	0.0505499	1.00874	0.96739	1.05185	NA	NA	NA	0.876545
BCAC_iCOGS	1-oleoyl-GPC (18:1) levels	Inverse variance weighted	2	0.249222	0.0630607	7.7471e-05	0.125623	0.372821	1.28303	1.13385	1.45182	0.918069	NA	TRUE	0.00256189
BCAC_iCOGS	1-oleoyl-GPE (18:1) levels	Inverse variance weighted	4	0.135411	0.104711	0.195945	-0.069822	0.340644	1.14501	0.93256	1.40585	NA	NA	NA	0.527904
BCAC_iCOGS	1-oleoyl-GPG (18:1) levels	Inverse variance weighted	3	0.0514718	0.024531	0.0358841	0.00339111	0.0995526	1.05282	1.0034	1.10468	0.355867	0.412798	TRUE	0.190346
BCAC_iCOGS	1-oleoyl-GPI (18:1) levels	Inverse variance weighted	3	-0.0503116	0.0688114	0.464687	-0.185182	0.0845588	0.950933	0.830953	1.08824	NA	NA	NA	0.785966
BCAC_iCOGS	1-oleoylglycerol (18:1) levels	Inverse variance weighted	4	-0.0296882	0.0733272	0.685571	-0.173409	0.114033	0.970748	0.840793	1.12079	NA	NA	NA	0.876545
BCAC_iCOGS	1-palmitoleoyl-2-linolenoyl-GPC (16:1_18:3) levels	Inverse variance weighted	7	0.00859219	0.0324275	0.791035	-0.0549657	0.07215	1.00863	0.946518	1.07482	NA	NA	NA	0.915082
BCAC_iCOGS	1-palmitoleoyl-GPC (16:1) levels	Inverse variance weighted	6	0.0692384	0.0816445	0.396411	-0.0907847	0.229262	1.07169	0.913214	1.25767	NA	NA	NA	0.74395
BCAC_iCOGS	1-palmitoyl-2-arachidonoyl-gpc (16:0_20:4n6) levels	Inverse variance weighted	28	-0.00517647	0.0117182	0.658674	-0.0281442	0.0177913	0.994837	0.972248	1.01795	NA	NA	NA	0.868052
BCAC_iCOGS	1-palmitoyl-2-arachidonoyl-GPE (16:0_20:4) levels	Inverse variance weighted	18	0.0136756	0.0220321	0.534789	-0.0295073	0.0568585	1.01377	0.970924	1.05851	NA	NA	NA	0.819969
BCAC_iCOGS	1-palmitoyl-2-arachidonoyl-GPI (16:0_20:4) levels	Inverse variance weighted	5	-0.0342469	0.0426632	0.422133	-0.117867	0.049373	0.966333	0.888814	1.05061	NA	NA	NA	0.765003
BCAC_iCOGS	1-palmitoyl-2-dihomo-linolenoyl-GPC (16:0_20:3n3 or 6) levels	Inverse variance weighted	11	0.0331801	0.0288979	0.250892	-0.0234597	0.0898199	1.03374	0.976813	1.09398	NA	NA	NA	0.606058
BCAC_iCOGS	1-palmitoyl-2-docosahexaenoyl-gpc (16:0_22:6) levels	Inverse variance weighted	6	0.0584432	0.0353792	0.0985528	-0.0109	0.127786	1.06018	0.989159	1.13631	NA	NA	NA	0.372095
BCAC_iCOGS	1-palmitoyl-2-docosahexaenoyl-GPE (16:0_22:6) levels	Inverse variance weighted	21	-0.000621237	0.0243698	0.979662	-0.048386	0.0471436	0.999379	0.952766	1.04827	NA	NA	NA	0.99135
BCAC_iCOGS	1-palmitoyl-2-linoleoyl-gpc (16:0_18:2) levels	Inverse variance weighted	11	0.00758651	0.0278888	0.785601	-0.0470755	0.0622485	1.00762	0.954015	1.06423	NA	NA	NA	0.913931
BCAC_iCOGS	1-palmitoyl-2-linoleoyl-GPE (16:0_18:2) levels	Inverse variance weighted	28	-0.000489824	0.0192961	0.979748	-0.0383101	0.0373304	0.99951	0.962414	1.03804	NA	NA	NA	0.99135
BCAC_iCOGS	1-palmitoyl-2-linoleoyl-GPI (16:0_18:2) levels	Inverse variance weighted	9	-0.0401212	0.0309235	0.194481	-0.100731	0.0204888	0.960673	0.904176	1.0207	NA	NA	NA	0.526857
BCAC_iCOGS	1-palmitoyl-2-oleoyl-gpc (16:0_18:1) levels	Inverse variance weighted	2	0.0945124	0.144259	0.512366	-0.188235	0.37726	1.09912	0.82842	1.45828	NA	NA	NA	0.804681
BCAC_iCOGS	1-palmitoyl-2-oleoyl-GPE (16:0_18:1) levels	Inverse variance weighted	16	0.00909426	0.0256191	0.722605	-0.0411191	0.0593077	1.00914	0.959715	1.0611	NA	NA	NA	0.890717
BCAC_iCOGS	1-palmitoyl-2-oleoyl-GPI (16:0_18:1) levels	Inverse variance weighted	6	-0.0588409	0.0366302	0.108197	-0.130636	0.0129543	0.942857	0.877537	1.01304	NA	NA	NA	0.393035
BCAC_iCOGS	1-palmitoyl-2-stearoyl-gpc (16:0_18:0) levels	Inverse variance weighted	5	-0.00960842	0.033884	0.776741	-0.0760211	0.0568043	0.990438	0.926797	1.05845	NA	NA	NA	0.909673
BCAC_iCOGS	1-palmitoyl-GPC (16:0) levels	Inverse variance weighted	3	0.195112	0.0557067	0.000460946	0.0859265	0.304297	1.21545	1.08973	1.35567	0.274154	0.41354	TRUE	0.0107816
BCAC_iCOGS	1-palmitoyl-GPE (16:0) levels	Inverse variance weighted	9	0.068843	0.0447567	0.124009	-0.0188801	0.156566	1.07127	0.981297	1.16949	NA	NA	NA	0.424059
BCAC_iCOGS	1-palmitoyl-GPG (16:0) levels	Wald ratio	rs1601935	0.0853318	0.101738	0.401614	-0.114074	0.284738	1.08908	0.892192	1.32941	NA	NA	NA	0.747859
BCAC_iCOGS	1-ribosyl-imidazoleacetate levels	Inverse variance weighted	4	-0.133354	0.0636342	0.0361153	-0.258077	-0.00863049	0.875156	0.772536	0.991407	0.24201	0.767831	TRUE	0.190346
BCAC_iCOGS	1-stearoyl-2-arachidonoyl-gpc (18:0_20:4) levels	Inverse variance weighted	37	-0.00559108	0.0118986	0.63843	-0.0289123	0.0177301	0.994425	0.971502	1.01789	NA	NA	NA	0.861117
BCAC_iCOGS	1-stearoyl-2-arachidonoyl-GPE (18:0_20:4) levels	Inverse variance weighted	18	0.00254435	0.0226515	0.910565	-0.0418526	0.0469413	1.00255	0.959011	1.04806	NA	NA	NA	0.96695
BCAC_iCOGS	1-stearoyl-2-arachidonoyl-GPI (18:0_20:4) levels	Inverse variance weighted	17	-0.00618132	0.0203405	0.76121	-0.0460486	0.033686	0.993838	0.954996	1.03426	NA	NA	NA	0.902349
BCAC_iCOGS	1-stearoyl-2-docosahexaenoyl-gpc (18:0_22:6) levels	Inverse variance weighted	7	0.0421709	0.0306164	0.168389	-0.0178372	0.102179	1.04307	0.982321	1.10758	NA	NA	NA	0.489083
BCAC_iCOGS	1-stearoyl-2-docosahexaenoyl-GPE (18:0_22:6) levels	Inverse variance weighted	10	-0.0112486	0.0333348	0.735784	-0.0765848	0.0540876	0.988814	0.926274	1.05558	NA	NA	NA	0.89659
BCAC_iCOGS	1-stearoyl-2-linoleoyl-gpc (18:0_18:2) levels	Inverse variance weighted	5	-0.0233807	0.0384244	0.542866	-0.0986925	0.0519311	0.976891	0.906021	1.0533	NA	NA	NA	0.819969
BCAC_iCOGS	1-stearoyl-2-linoleoyl-GPE (18:0_18:2) levels	Inverse variance weighted	13	-0.00177101	0.0266929	0.947101	-0.0540891	0.0505471	0.998231	0.947348	1.05185	NA	NA	NA	0.985282
BCAC_iCOGS	1-stearoyl-2-linoleoyl-GPI (18:0_18:2) levels	Inverse variance weighted	10	-0.0239246	0.025952	0.356591	-0.0747904	0.0269412	0.976359	0.927938	1.02731	NA	NA	NA	0.706552
BCAC_iCOGS	1-stearoyl-2-oleoyl-gpc (18:0_18:1) levels	Inverse variance weighted	2	0.000427341	0.131542	0.997408	-0.257394	0.258249	1.00043	0.773063	1.29466	NA	NA	NA	0.998449
BCAC_iCOGS	1-stearoyl-2-oleoyl-GPE (18:0_18:1) levels	Inverse variance weighted	10	0.019383	0.0267927	0.469407	-0.0331306	0.0718967	1.01957	0.967412	1.07454	NA	NA	NA	0.787967
BCAC_iCOGS	1-stearoyl-2-oleoyl-GPI (18:0_18:1) levels	Inverse variance weighted	12	-0.0481797	0.0280139	0.0854592	-0.103087	0.00672744	0.952963	0.902049	1.00675	NA	NA	NA	0.331803
BCAC_iCOGS	1-stearoyl-2-oleoyl-GPS (18:0_18:1) levels	Wald ratio	rs1354034	0.107036	0.0876581	0.222064	-0.0647742	0.278845	1.11297	0.937279	1.3216	NA	NA	NA	0.56177
BCAC_iCOGS	1-stearoyl-gpc (18:0) levels	Inverse variance weighted	4	0.157544	0.0697755	0.0239535	0.0207843	0.294304	1.17063	1.021	1.34219	0.0941168	0.169206	TRUE	0.144474
BCAC_iCOGS	1-stearoyl-GPE (18:0) levels	Inverse variance weighted	12	0.0463728	0.0346219	0.180438	-0.0214861	0.114232	1.04746	0.978743	1.12101	NA	NA	NA	0.503023
BCAC_iCOGS	1-stearoyl-GPG (18:0) levels	Inverse variance weighted	4	0.0624482	0.0829966	0.451799	-0.100225	0.225122	1.06444	0.904634	1.25248	NA	NA	NA	0.777968
BCAC_iCOGS	1,2-dilinoleoyl-GPC (18:2_18:2) levels	Inverse variance weighted	6	0.00186598	0.0307326	0.951585	-0.05837	0.062102	1.00187	0.943301	1.06407	NA	NA	NA	0.9887
BCAC_iCOGS	1,2-dilinoleoyl-GPE (18:2_18:2) levels	Inverse variance weighted	3	-0.00632204	0.0546889	0.90797	-0.113512	0.100868	0.993698	0.892693	1.10613	NA	NA	NA	0.96695
BCAC_iCOGS	1,2-dipalmitoyl-gpc (16:0_16:0) levels	Inverse variance weighted	16	0.0106932	0.02376	0.652674	-0.0358764	0.0572627	1.01075	0.96476	1.05893	NA	NA	NA	0.868052
BCAC_iCOGS	1,3-dimethylurate levels	Inverse variance weighted	2	0.0323876	0.0922846	0.725623	-0.14849	0.213265	1.03292	0.862009	1.23771	NA	NA	NA	0.891002
BCAC_iCOGS	1,3,7-trimethylurate levels	Inverse variance weighted	3	-0.0336448	0.0591352	0.569393	-0.14955	0.0822603	0.966915	0.861096	1.08574	NA	NA	NA	0.82667
BCAC_iCOGS	1,5-anhydroglucitol (1,5-ag) levels	Inverse variance weighted	16	0.0183508	0.030114	0.542273	-0.0406726	0.0773743	1.01852	0.960143	1.08045	NA	NA	NA	0.819969
BCAC_iCOGS	10-undecenoate (11:1n1) levels	Inverse variance weighted	9	-0.00809819	0.0199356	0.684583	-0.047172	0.0309757	0.991935	0.953923	1.03146	NA	NA	NA	0.876545
BCAC_iCOGS	11beta-hydroxyandrosterone glucuronide levels	Inverse variance weighted	28	0.0177902	0.0183002	0.330984	-0.0180782	0.0536587	1.01795	0.982084	1.05512	NA	NA	NA	0.687926
BCAC_iCOGS	11beta-hydroxyetiocholanolone glucuronide levels	Inverse variance weighted	3	0.0198076	0.0581717	0.733478	-0.094209	0.133824	1.02001	0.910093	1.14319	NA	NA	NA	0.896058
BCAC_iCOGS	16a-hydroxy DHEA 3-sulfate levels	Inverse variance weighted	30	-0.0302893	0.0112216	0.00695086	-0.0522836	-0.0082949	0.970165	0.94906	0.991739	0.643265	0.22526	TRUE	0.0605989
BCAC_iCOGS	17alpha-hydroxypregnanolone glucuronide levels	Inverse variance weighted	13	-0.00497799	0.0162955	0.759998	-0.0369171	0.0269612	0.995034	0.963756	1.02733	NA	NA	NA	0.902349
BCAC_iCOGS	2'-deoxyuridine levels	Inverse variance weighted	7	-0.000713911	0.0283681	0.979923	-0.0563154	0.0548876	0.999286	0.945241	1.05642	NA	NA	NA	0.99135
BCAC_iCOGS	2'-deoxyuridine to cytidine ratio	Inverse variance weighted	3	0.0571076	0.0777428	0.462601	-0.0952683	0.209484	1.05877	0.909129	1.23304	NA	NA	NA	0.785966
BCAC_iCOGS	2'-o-methylcytidine levels	Inverse variance weighted	52	-0.00152569	0.0116058	0.895412	-0.024273	0.0212216	0.998475	0.976019	1.02145	NA	NA	NA	0.96695
BCAC_iCOGS	2'-o-methyluridine levels	Inverse variance weighted	54	-0.00237978	0.0104895	0.820522	-0.0229392	0.0181796	0.997623	0.977322	1.01835	NA	NA	NA	0.925742
BCAC_iCOGS	2-aminobutyrate levels	Inverse variance weighted	3	-0.129438	0.0617243	0.0359898	-0.250418	-0.00845889	0.878589	0.778475	0.991577	0.237554	0.348528	TRUE	0.190346
BCAC_iCOGS	2-aminooctanoate levels	Inverse variance weighted	31	0.0442976	0.0135787	0.00110515	0.0176834	0.0709117	1.04529	1.01784	1.07349	0.157169	0.127112	TRUE	0.0173744
BCAC_iCOGS	2-butenoylglycine levels	Inverse variance weighted	8	0.00392673	0.0405005	0.922762	-0.0754543	0.0833077	1.00393	0.927322	1.08688	NA	NA	NA	0.973519
BCAC_iCOGS	2-hydroxy-3-methylvalerate levels	Inverse variance weighted	3	0.0876524	0.0882132	0.320397	-0.0852454	0.26055	1.09161	0.918287	1.29764	NA	NA	NA	0.687397
BCAC_iCOGS	2-hydroxy-4-(methylthio)butanoic acid levels	Inverse variance weighted	37	-0.0355119	0.0126052	0.00484372	-0.0602181	-0.0108058	0.965111	0.941559	0.989252	0.904119	0.707475	TRUE	0.047002
BCAC_iCOGS	2-hydroxybutyrate_2-hydroxyisobutyrate levels	Wald ratio	rs887417	-0.0129822	0.116455	0.911238	-0.241235	0.21527	0.987102	0.785657	1.2402	NA	NA	NA	0.96695
BCAC_iCOGS	2-hydroxydecanoate levels	Inverse variance weighted	5	0.132713	0.0819835	0.105495	-0.0279744	0.293401	1.14192	0.972413	1.34098	NA	NA	NA	0.386142
BCAC_iCOGS	2-hydroxyglutarate levels	Inverse variance weighted	2	-0.00762327	0.0725382	0.916302	-0.149798	0.134552	0.992406	0.860882	1.14402	NA	NA	NA	0.969905
BCAC_iCOGS	2-hydroxyoctanoate levels	Inverse variance weighted	9	0.133924	0.0314811	2.09875e-05	0.0722214	0.195628	1.14331	1.07489	1.21607	0.411312	0.592277	TRUE	0.000958429
BCAC_iCOGS	2-hydroxyphenylacetate levels	Wald ratio	rs2977995	-0.00929037	0.0697026	0.893967	-0.145908	0.127327	0.990753	0.864238	1.13579	NA	NA	NA	0.96695
BCAC_iCOGS	2-hydroxysebacate levels	Inverse variance weighted	7	0.112134	0.0350412	0.00137401	0.043453	0.180814	1.11866	1.04441	1.19819	0.78176	0.356502	TRUE	0.0193776
BCAC_iCOGS	2-ketocaprylate levels	Inverse variance weighted	14	0.080237	0.0252282	0.00147048	0.0307897	0.129684	1.08354	1.03127	1.13847	0.191187	0.335889	TRUE	0.0201456
BCAC_iCOGS	2-o-methylascorbic acid levels	Inverse variance weighted	24	-0.0262091	0.0175377	0.13506	-0.060583	0.00816479	0.974131	0.941216	1.0082	NA	NA	NA	0.443569
BCAC_iCOGS	2-oxoarginine levels	Inverse variance weighted	3	0.00418719	0.0858524	0.961101	-0.164084	0.172458	1.0042	0.848671	1.18822	NA	NA	NA	0.991071
BCAC_iCOGS	2-palmitoleoyl-GPC (16:1) levels	Wald ratio	rs603424	-0.0917465	0.0942206	0.330185	-0.276419	0.092926	0.912336	0.758495	1.09738	NA	NA	NA	0.687926
BCAC_iCOGS	2-palmitoyl-GPC (16:0) levels	Inverse variance weighted	2	0.291442	0.0711936	4.2463e-05	0.151902	0.430981	1.33836	1.16405	1.53877	0.64115	NA	TRUE	0.00162888
BCAC_iCOGS	2-stearoyl-GPE (18:0) levels	Inverse variance weighted	4	0.157008	0.0874433	0.0725684	-0.0143813	0.328397	1.17	0.985722	1.38874	NA	NA	NA	0.292408
BCAC_iCOGS	2,2'-Methylenebis(6-tert-butyl-p-cresol) levels	Wald ratio	rs11744583	-0.000705915	0.158718	0.996451	-0.311794	0.310382	0.999294	0.732132	1.36395	NA	NA	NA	0.998449
BCAC_iCOGS	2,3-dihydroxy-5-methylthio-4-pentenoate (dmtpa) levels	Inverse variance weighted	2	-0.162143	0.0847148	0.0556224	-0.328184	0.00389839	0.85032	0.720231	1.00391	NA	NA	NA	0.249003
BCAC_iCOGS	2,6-dihydroxybenzoic acid levels	Inverse variance weighted	2	-0.0131513	0.0624527	0.833215	-0.135559	0.109256	0.986935	0.873228	1.11545	NA	NA	NA	0.93235
BCAC_iCOGS	21-hydroxypregnenolone disulfate levels	Inverse variance weighted	10	0.0141698	0.0315893	0.653746	-0.0477452	0.0760848	1.01427	0.953377	1.07905	NA	NA	NA	0.868052
BCAC_iCOGS	2R,3R-dihydroxybutyrate levels	Inverse variance weighted	15	-0.0688301	0.0289544	0.017445	-0.125581	-0.0120795	0.933485	0.881985	0.987993	0.213913	0.235792	TRUE	0.119112
BCAC_iCOGS	3-(3-amino-3-carboxypropyl)uridine levels	Inverse variance weighted	2	-0.0728992	0.228895	0.750119	-0.521534	0.375735	0.929695	0.59361	1.45606	NA	NA	NA	0.902349
BCAC_iCOGS	3-(4-hydroxyphenyl)lactate levels	Inverse variance weighted	3	-0.033504	0.152012	0.825557	-0.331449	0.26444	0.967051	0.717883	1.3027	NA	NA	NA	0.928147
BCAC_iCOGS	3-amino-2-piperidone levels	Inverse variance weighted	3	-0.00102409	0.0704659	0.988405	-0.139137	0.137089	0.998976	0.870109	1.14693	NA	NA	NA	0.994628
BCAC_iCOGS	3-aminoisobutyrate levels	Inverse variance weighted	31	0.0269102	0.0122076	0.0274977	0.00298328	0.0508371	1.02728	1.00299	1.05215	0.623081	0.304144	TRUE	0.15982
BCAC_iCOGS	3-bromo-5-chloro-2,6-dihydroxybenzoic acid levels	Inverse variance weighted	6	-0.0786002	0.0326699	0.0161332	-0.142633	-0.0145671	0.924409	0.867072	0.985538	0.461239	0.916406	TRUE	0.112114
BCAC_iCOGS	3-carboxy-4-methyl-5-pentyl-2-furanpropionate (3-CMPFP) levels	Inverse variance weighted	20	-0.0375869	0.0218311	0.0851208	-0.0803758	0.00520197	0.963111	0.92277	1.00522	NA	NA	NA	0.331803
BCAC_iCOGS	3-carboxy-4-methyl-5-propyl-2-furanpropanoate (cmpf) levels	Wald ratio	rs2328895	0.0393587	0.109485	0.71923	-0.175233	0.25395	1.04014	0.839262	1.28911	NA	NA	NA	0.888723
BCAC_iCOGS	3-formylindole levels	Inverse variance weighted	22	0.00976098	0.0171594	0.569463	-0.0238714	0.0433934	1.00981	0.976411	1.04435	NA	NA	NA	0.82667
BCAC_iCOGS	3-hydroxy-2-ethylpropionate levels	Inverse variance weighted	3	-0.0569402	0.0546554	0.297502	-0.164065	0.0501843	0.944651	0.848687	1.05146	NA	NA	NA	0.671458
BCAC_iCOGS	3-hydroxy-2-methylpyridine sulfate levels	Wald ratio	rs2472297	0.314607	0.122382	0.0101494	0.0747385	0.554476	1.36972	1.0776	1.74103	NA	NA	TRUE	0.0778659
BCAC_iCOGS	3-hydroxybutyroylglycine levels	Inverse variance weighted	15	0.00617259	0.0263877	0.815048	-0.0455473	0.0578925	1.00619	0.955474	1.0596	NA	NA	NA	0.923914
BCAC_iCOGS	3-hydroxydecanoate levels	Inverse variance weighted	4	-0.164807	0.0351338	2.72092e-06	-0.233669	-0.0959447	0.848057	0.791624	0.908514	0.853805	0.822142	TRUE	0.000173957
BCAC_iCOGS	3-hydroxydecanoylcarnitine levels	Wald ratio	rs924135	-0.124846	0.121804	0.305373	-0.363581	0.113889	0.882633	0.695182	1.12063	NA	NA	NA	0.675247
BCAC_iCOGS	3-hydroxydodecanedioate levels	Wald ratio	rs4284207	0.0261328	0.102383	0.798534	-0.174538	0.226804	1.02648	0.839845	1.25458	NA	NA	NA	0.917119
BCAC_iCOGS	3-hydroxyhexanoate levels	Inverse variance weighted	3	-0.0208174	0.0843697	0.805109	-0.186182	0.144547	0.979398	0.830122	1.15552	NA	NA	NA	0.921429
BCAC_iCOGS	3-hydroxyhexanoylcarnitine (1) levels	Inverse variance weighted	6	-0.0085605	0.0688753	0.901086	-0.143556	0.126435	0.991476	0.866272	1.13478	NA	NA	NA	0.96695
BCAC_iCOGS	3-hydroxylaurate levels	Inverse variance weighted	3	-0.220491	0.0658341	0.000810456	-0.349526	-0.0914566	0.802125	0.705022	0.912601	0.948319	0.886272	TRUE	0.0149467
BCAC_iCOGS	3-hydroxyoctanoate levels	Inverse variance weighted	3	-0.265904	0.0616234	1.59609e-05	-0.386686	-0.145122	0.766512	0.679304	0.864916	0.797196	0.663776	TRUE	0.000765325
BCAC_iCOGS	3-hydroxyoctanoylcarnitine (1) levels	Inverse variance weighted	2	-0.0552181	0.0805558	0.493052	-0.213107	0.102671	0.946279	0.808069	1.10813	NA	NA	NA	0.796311
BCAC_iCOGS	3-hydroxyoctanoylcarnitine (2) levels	Inverse variance weighted	2	-0.0520047	0.0797894	0.514547	-0.208392	0.104383	0.949324	0.811889	1.11003	NA	NA	NA	0.804976
BCAC_iCOGS	3-hydroxyoleoylcarnitine levels	Inverse variance weighted	2	-0.261091	0.111352	0.0190408	-0.479341	-0.0428406	0.770211	0.619191	0.958064	0.120214	NA	TRUE	0.123851
BCAC_iCOGS	3-hydroxysebacate levels	Inverse variance weighted	7	-0.0344339	0.0485682	0.478336	-0.129628	0.0607597	0.966152	0.878423	1.06264	NA	NA	NA	0.790753
BCAC_iCOGS	3-indoleglyoxylic acid levels	Inverse variance weighted	12	0.0126247	0.0213857	0.554966	-0.0292912	0.0545406	1.0127	0.971134	1.05606	NA	NA	NA	0.82204
BCAC_iCOGS	3-methoxycatechol sulfate (2) levels	Wald ratio	rs144886872	0.136171	0.149399	0.362052	-0.15665	0.428993	1.14588	0.855003	1.53571	NA	NA	NA	0.71045
BCAC_iCOGS	3-methoxytyramine sulfate levels	Wald ratio	rs10840516	-0.18238	0.096616	0.0590692	-0.371747	0.00698746	0.833285	0.689528	1.00701	NA	NA	NA	0.256323
BCAC_iCOGS	3-methoxytyrosine levels	Inverse variance weighted	11	-0.0132759	0.0294612	0.652261	-0.0710197	0.044468	0.986812	0.931444	1.04547	NA	NA	NA	0.868052
BCAC_iCOGS	3-methyl-2-oxobutyrate levels	Wald ratio	rs1129043	0.125413	0.0823533	0.127792	-0.0359995	0.286825	1.13362	0.964641	1.33219	NA	NA	NA	0.424059
BCAC_iCOGS	3-methyl-2-oxovalerate to 3-methyl-2-oxobutyrate ratio	Wald ratio	rs78177403	0.0153897	0.122737	0.900217	-0.225175	0.255955	1.01551	0.798376	1.29169	NA	NA	NA	0.96695
BCAC_iCOGS	3-methylcytidine levels	Inverse variance weighted	42	0.0345523	0.00775301	8.326e-06	0.0193564	0.0497482	1.03516	1.01954	1.05101	0.926063	0.19957	TRUE	0.000443591
BCAC_iCOGS	3-methylglutaconate levels	Inverse variance weighted	21	0.0343148	0.0162531	0.0347478	0.00245884	0.0661708	1.03491	1.00246	1.06841	0.523728	0.940267	TRUE	0.18924
BCAC_iCOGS	3-methylglutarylcarnitine (2) levels	Inverse variance weighted	26	0.029439	0.0189659	0.120613	-0.0077342	0.0666122	1.02988	0.992296	1.06888	NA	NA	NA	0.42227
BCAC_iCOGS	3-methylxanthine levels	Wald ratio	rs56113850	-0.104723	0.134381	0.435802	-0.36811	0.158663	0.900574	0.692041	1.17194	NA	NA	NA	0.765003
BCAC_iCOGS	3-phosphoglycerate to adenosine 5'-diphosphate (ADP) ratio	Wald ratio	rs72663992	-0.0337628	0.0922982	0.714514	-0.214667	0.147142	0.966801	0.80681	1.15852	NA	NA	NA	0.888723
BCAC_iCOGS	3-ureidopropionate levels	Wald ratio	rs140330	0.0180079	0.103177	0.861446	-0.18422	0.220235	1.01817	0.831753	1.24637	NA	NA	NA	0.949091
BCAC_iCOGS	3,4-dihydroxybutyrate levels	Inverse variance weighted	3	-0.0585951	0.0495914	0.237382	-0.155794	0.0386041	0.943089	0.855735	1.03936	NA	NA	NA	0.582223
BCAC_iCOGS	3,5-dichloro-2,6-dihydroxybenzoic acid levels	Inverse variance weighted	6	-0.0916157	0.032526	0.00485214	-0.155367	-0.0278647	0.912456	0.856101	0.97252	0.993466	0.851405	TRUE	0.047002
BCAC_iCOGS	3b-hydroxy-5-cholenoic acid levels	Wald ratio	rs10426201	0.0823816	0.0875594	0.346773	-0.0892347	0.253998	1.08587	0.914631	1.28917	NA	NA	NA	0.695723
BCAC_iCOGS	3beta-hydroxy-5-cholestenoate levels	Inverse variance weighted	25	0.0257145	0.01845	0.163396	-0.0104475	0.0618765	1.02605	0.989607	1.06383	NA	NA	NA	0.480666
BCAC_iCOGS	4-acetamidobutanoate levels	Inverse variance weighted	6	0.0737904	0.0314741	0.0190537	0.0121011	0.13548	1.07658	1.01217	1.14509	0.482652	0.58834	TRUE	0.123851
BCAC_iCOGS	4-allylphenol sulfate levels	Wald ratio	rs9467618	-0.0372093	0.0997999	0.709268	-0.232817	0.158398	0.963474	0.792298	1.17163	NA	NA	NA	0.888723
BCAC_iCOGS	4-cholesten-3-one levels	Inverse variance weighted	2	-0.0262722	0.0728238	0.718276	-0.169007	0.116462	0.97407	0.844503	1.12352	NA	NA	NA	0.888723
BCAC_iCOGS	4-ethylphenylsulfate levels	Wald ratio	rs3799346	-0.0811462	0.131996	0.538711	-0.339858	0.177566	0.922059	0.711872	1.19431	NA	NA	NA	0.819969
BCAC_iCOGS	4-guanidinobutanoate levels	Inverse variance weighted	40	0.0231848	0.0149958	0.122083	-0.00620693	0.0525765	1.02346	0.993812	1.05398	NA	NA	NA	0.42227
BCAC_iCOGS	4-hydroxychlorothalonil levels	Inverse variance weighted	13	-0.0581169	0.01979	0.00331737	-0.0969053	-0.0193286	0.94354	0.907642	0.980857	0.758925	0.754177	TRUE	0.0361322
BCAC_iCOGS	4-hydroxyglutamate levels	Wald ratio	rs7078003	-0.0842369	0.106615	0.429466	-0.293202	0.124728	0.919213	0.745871	1.13284	NA	NA	NA	0.765003
BCAC_iCOGS	4-hydroxyphenylacetate levels	Wald ratio	rs4438875	-0.165562	0.136368	0.224716	-0.432842	0.101719	0.847418	0.648663	1.10707	NA	NA	NA	0.565624
BCAC_iCOGS	4-hydroxyphenylacetoylcarnitine levels	Inverse variance weighted	6	0.160723	0.0349029	4.1276e-06	0.092313	0.229132	1.17436	1.09671	1.25751	0.958144	0.769839	TRUE	0.000247398
BCAC_iCOGS	4-hydroxyphenylacetylglutamine levels	Inverse variance weighted	3	0.192023	0.0917767	0.0364125	0.0121412	0.371906	1.2117	1.01222	1.4505	0.169909	0.345384	TRUE	0.190817
BCAC_iCOGS	4-hydroxyphenylpyruvate levels	Wald ratio	rs71456122	-0.0896374	0.170972	0.600083	-0.424742	0.245467	0.914263	0.653938	1.27822	NA	NA	NA	0.841344
BCAC_iCOGS	4-methoxyphenol sulfate levels	Wald ratio	rs72639855	0.127792	0.12826	0.319079	-0.123597	0.379181	1.13632	0.883736	1.46109	NA	NA	NA	0.687397
BCAC_iCOGS	4-methyl-2-oxopentanoate levels	Wald ratio	rs893971	0.220666	0.115071	0.0551543	-0.00487221	0.446204	1.24691	0.99514	1.56237	NA	NA	NA	0.249003
BCAC_iCOGS	4-methyl-2-oxopentanoate to 3-methyl-2-oxobutyrate ratio	Wald ratio	rs117351628	0.212875	0.232793	0.360488	-0.2434	0.66915	1.23723	0.783958	1.95258	NA	NA	NA	0.709872
BCAC_iCOGS	4-methylhexanoylglutamine levels	Inverse variance weighted	7	0.0648835	0.0322502	0.0442323	0.00167322	0.128094	1.06703	1.00167	1.13666	0.209487	0.876206	TRUE	0.220931
BCAC_iCOGS	4-oxo-retinoic acid levels	Inverse variance weighted	2	-0.109294	0.0661395	0.0984366	-0.238928	0.0203392	0.896467	0.787472	1.02055	NA	NA	NA	0.372095
BCAC_iCOGS	4-vinylphenol sulfate levels	Wald ratio	rs78237766	0.00680538	0.168166	0.96772	-0.3228	0.336411	1.00683	0.724118	1.39991	NA	NA	NA	0.99135
BCAC_iCOGS	5-(galactosylhydroxy)-L-lysine levels	Wald ratio	rs35328001	-0.0145976	0.118706	0.902128	-0.247261	0.218065	0.985508	0.780937	1.24367	NA	NA	NA	0.96695
BCAC_iCOGS	5-acetylamino-6-amino-3-methyluracil levels	Inverse variance weighted	11	0.0131788	0.0307529	0.66826	-0.047097	0.0734545	1.01327	0.953995	1.07622	NA	NA	NA	0.868052
BCAC_iCOGS	5-acetylamino-6-formylamino-3-methyluracil levels	Inverse variance weighted	36	0.00537959	0.010734	0.616248	-0.015659	0.0264182	1.00539	0.984463	1.02677	NA	NA	NA	0.84801
BCAC_iCOGS	5-dodecenoate (12:1n7) levels	Wald ratio	rs603424	-0.119679	0.122906	0.330185	-0.360575	0.121217	0.887205	0.697275	1.12887	NA	NA	NA	0.687926
BCAC_iCOGS	5-dodecenoylcarnitine (C12:1) levels	Inverse variance weighted	2	0.00487605	0.13471	0.971126	-0.259157	0.268909	1.00489	0.771702	1.30854	NA	NA	NA	0.99135
BCAC_iCOGS	5-hydroxy-2-methylpyridine sulfate levels	Wald ratio	rs2472297	0.272878	0.106149	0.0101494	0.0648252	0.48093	1.31374	1.06697	1.61758	NA	NA	TRUE	0.0778659
BCAC_iCOGS	5-hydroxyindole sulfate levels	Inverse variance weighted	3	0.137106	0.0700347	0.0502667	-0.000161938	0.274374	1.14695	0.999838	1.31571	NA	NA	NA	0.238642
BCAC_iCOGS	5-hydroxylysine levels	Inverse variance weighted	25	0.000571324	0.0148842	0.969381	-0.0286017	0.0297444	1.00057	0.971803	1.03019	NA	NA	NA	0.99135
BCAC_iCOGS	5-methylthioadenosine (mta) levels	Inverse variance weighted	7	-0.0560719	0.0449501	0.212241	-0.144174	0.0320302	0.945471	0.865737	1.03255	NA	NA	NA	0.559174
BCAC_iCOGS	5-methylthioadenosine (MTA) to phosphate ratio	Inverse variance weighted	6	-0.0499889	0.0453473	0.270307	-0.13887	0.0388918	0.95124	0.870342	1.03966	NA	NA	NA	0.629185
BCAC_iCOGS	5-methyluridine (ribothymidine) levels	Inverse variance weighted	25	-0.00639387	0.0145702	0.660784	-0.0349515	0.0221638	0.993627	0.965652	1.02241	NA	NA	NA	0.868052
BCAC_iCOGS	5-oxoproline levels	Inverse variance weighted	13	0.0142838	0.0158054	0.366139	-0.0166948	0.0452623	1.01439	0.983444	1.0463	NA	NA	NA	0.71045
BCAC_iCOGS	5-oxoproline to citrate ratio	Inverse variance weighted	14	0.0153123	0.0171511	0.371969	-0.0183038	0.0489284	1.01543	0.981863	1.05015	NA	NA	NA	0.71045
BCAC_iCOGS	5,6-dihydrothymine levels	Wald ratio	rs131755	-0.0395789	0.130863	0.762313	-0.296071	0.216913	0.961194	0.743734	1.24224	NA	NA	NA	0.902541
BCAC_iCOGS	5,6-dihydrouridine levels	Inverse variance weighted	7	-0.0412042	0.0750887	0.583183	-0.188378	0.10597	0.959633	0.828301	1.11179	NA	NA	NA	0.829782
BCAC_iCOGS	5alpha-androstan-3alpha,17alpha-diol monosulfate levels	Inverse variance weighted	21	0.0205637	0.0172213	0.232445	-0.0131901	0.0543174	1.02078	0.986897	1.05582	NA	NA	NA	0.5775
BCAC_iCOGS	5alpha-androstan-3alpha,17beta-diol disulfate levels	Wald ratio	rs28505302	0.0187141	0.100918	0.852885	-0.179085	0.216514	1.01889	0.836035	1.24174	NA	NA	NA	0.944476
BCAC_iCOGS	5alpha-androstan-3alpha,17beta-diol monosulfate (1) levels	Inverse variance weighted	32	0.0345412	0.0102387	0.000741945	0.0144733	0.054609	1.03514	1.01458	1.05613	0.274221	0.749932	TRUE	0.0139515
BCAC_iCOGS	5alpha-androstan-3alpha,17beta-diol monosulfate (2) levels	Inverse variance weighted	4	0.0211263	0.0441164	0.632027	-0.0653419	0.107594	1.02135	0.936747	1.1136	NA	NA	NA	0.857304
BCAC_iCOGS	5alpha-androstan-3beta,17alpha-diol disulfate levels	Inverse variance weighted	5	0.0027994	0.0544738	0.959015	-0.103969	0.109568	1.0028	0.901253	1.1158	NA	NA	NA	0.990472
BCAC_iCOGS	5alpha-androstan-3beta,17beta-diol disulfate levels	Inverse variance weighted	23	0.0629652	0.0179489	0.000451458	0.0277853	0.0981451	1.06499	1.02817	1.10312	0.858794	0.696196	TRUE	0.0107816
BCAC_iCOGS	5alpha-androstan-3beta,17beta-diol monosulfate (2) levels	Inverse variance weighted	21	0.0427328	0.013029	0.00103871	0.017196	0.0682697	1.04366	1.01734	1.07065	0.356879	0.417582	TRUE	0.0168834
BCAC_iCOGS	5alpha-pregnan-3beta,20alpha-diol disulfate levels	Inverse variance weighted	13	0.0180089	0.0279608	0.519525	-0.0367942	0.0728121	1.01817	0.963874	1.07553	NA	NA	NA	0.81012
BCAC_iCOGS	5alpha-pregnan-3beta,20alpha-diol monosulfate (2) levels	Inverse variance weighted	11	0.000833284	0.0351321	0.981077	-0.0680257	0.0696923	1.00083	0.934236	1.07218	NA	NA	NA	0.99135
BCAC_iCOGS	5alpha-pregnan-3beta,20beta-diol monosulfate (1) levels	Inverse variance weighted	33	-0.00511094	0.0156843	0.744528	-0.0358522	0.0256303	0.994902	0.964783	1.02596	NA	NA	NA	0.901607
BCAC_iCOGS	5alpha-pregnan-diol disulfate levels	Inverse variance weighted	6	-0.0190454	0.0287065	0.507042	-0.0753102	0.0372194	0.981135	0.927456	1.03792	NA	NA	NA	0.802924
BCAC_iCOGS	6-bromotryptophan levels	Inverse variance weighted	16	0.00924174	0.0201914	0.647163	-0.0303334	0.0488168	1.00928	0.970122	1.05003	NA	NA	NA	0.868052
BCAC_iCOGS	6-hydroxyindole sulfate levels	Wald ratio	rs56113850	0.0983819	0.126244	0.435802	-0.149056	0.34582	1.10338	0.861521	1.41315	NA	NA	NA	0.765003
BCAC_iCOGS	6-oxopiperidine-2-carboxylate levels	Inverse variance weighted	10	-0.0375072	0.0245021	0.125826	-0.0855314	0.010517	0.963187	0.918024	1.01057	NA	NA	NA	0.424059
BCAC_iCOGS	7-alpha-hydroxy-3-oxo-4-cholestenoate (7-hoca) levels	Inverse variance weighted	2	-0.181816	0.130729	0.164291	-0.438045	0.0744129	0.833755	0.645297	1.07725	NA	NA	NA	0.480773
BCAC_iCOGS	7-methylguanine levels	Inverse variance weighted	2	0.0966849	0.0715976	0.17689	-0.0436464	0.237016	1.10151	0.957292	1.26746	NA	NA	NA	0.502441
BCAC_iCOGS	7-methylxanthine levels	Inverse variance weighted	5	0.179279	0.0575005	0.00182166	0.0665778	0.29198	1.19635	1.06884	1.33908	0.291072	0.319236	TRUE	0.023293
BCAC_iCOGS	8-methoxykynurenate levels	Inverse variance weighted	4	-0.0218086	0.0562675	0.698321	-0.132093	0.0884758	0.978427	0.87626	1.09251	NA	NA	NA	0.886084
BCAC_iCOGS	9-hydroxystearate levels	Wald ratio	rs603424	-0.116636	0.119781	0.330185	-0.351406	0.118135	0.889909	0.703698	1.1254	NA	NA	NA	0.687926
BCAC_iCOGS	Acetylcarnitine (C2) to propionylcarnitine (C3) ratio	Inverse variance weighted	3	-0.197771	0.0570201	0.00052347	-0.309531	-0.086012	0.820557	0.733791	0.917583	0.831909	0.7927	TRUE	0.0116746
BCAC_iCOGS	Acetylcarnitine levels (Biocrates platform)	Inverse variance weighted	5	0.0357909	0.0662116	0.588816	-0.0939839	0.165566	1.03644	0.910297	1.18006	NA	NA	NA	0.834083
BCAC_iCOGS	Acisoga levels	Inverse variance weighted	17	0.0133291	0.022825	0.559241	-0.0314079	0.058066	1.01342	0.96908	1.05978	NA	NA	NA	0.822367
BCAC_iCOGS	Aconitate [cis or trans] levels	Wald ratio	rs807666	0.0308607	0.129697	0.811924	-0.223346	0.285067	1.03134	0.799838	1.32985	NA	NA	NA	0.923648
BCAC_iCOGS	Adenosine 3',5'-cyclic monophosphate (camp) levels	Inverse variance weighted	7	0.033254	0.0415985	0.424056	-0.048279	0.114787	1.03381	0.952868	1.12163	NA	NA	NA	0.765003
BCAC_iCOGS	Adenosine 5'-diphosphate (ADP) to 5-oxoproline ratio	Wald ratio	rs3935209	-0.0815274	0.0809355	0.313784	-0.240161	0.0771062	0.921707	0.786501	1.08016	NA	NA	NA	0.685465
BCAC_iCOGS	Adenosine 5'-diphosphate (ADP) to creatine ratio	Wald ratio	rs1047891	-0.147093	0.0932431	0.114676	-0.329849	0.0356637	0.863214	0.719032	1.03631	NA	NA	NA	0.405809
BCAC_iCOGS	Adenosine 5'-diphosphate (ADP) to flavin adenine dinucleotide (FAD) ratio	Wald ratio	rs2706762	0.164247	0.0902063	0.068639	-0.0125578	0.341051	1.1785	0.987521	1.40642	NA	NA	NA	0.28251
BCAC_iCOGS	Adenosine 5'-diphosphate (ADP) to glycerate ratio	Wald ratio	rs74802261	0.169885	0.126111	0.177947	-0.0772934	0.417063	1.18517	0.925618	1.5175	NA	NA	NA	0.502441
BCAC_iCOGS	Adenosine 5'-diphosphate (ADP) to glycine ratio	Inverse variance weighted	2	-0.0792122	0.0394656	0.0447371	-0.156565	-0.00185955	0.923844	0.855076	0.998142	0.988183	NA	TRUE	0.221554
BCAC_iCOGS	Adenosine 5'-diphosphate (ADP) to N-acetylneuraminate ratio	Inverse variance weighted	2	0.0995997	0.0804197	0.215531	-0.0580228	0.257222	1.10473	0.943628	1.29333	NA	NA	NA	0.56177
BCAC_iCOGS	Adenosine 5'-diphosphate (ADP) to phosphoethanolamine ratio	Wald ratio	rs112036394	0.098385	0.126398	0.436347	-0.149354	0.346124	1.10339	0.861264	1.41358	NA	NA	NA	0.765003
BCAC_iCOGS	Adenosine 5'-monophosphate (AMP) to asparagine ratio	Inverse variance weighted	2	0.0625288	0.0740792	0.398625	-0.0826665	0.207724	1.06453	0.920658	1.23087	NA	NA	NA	0.744772
BCAC_iCOGS	Adenosine 5'-monophosphate (AMP) to aspartate ratio	Wald ratio	rs1354034	-0.138636	0.113538	0.222064	-0.36117	0.0838976	0.870545	0.696861	1.08752	NA	NA	NA	0.56177
BCAC_iCOGS	Adenosine 5'-monophosphate (AMP) to flavin adenine dinucleotide (FAD) ratio	Inverse variance weighted	7	0.14762	0.0332984	9.28301e-06	0.0823548	0.212885	1.15907	1.08584	1.23724	0.995574	0.983661	TRUE	0.000468548
BCAC_iCOGS	Adenosine 5'-monophosphate (AMP) to glycine ratio	Inverse variance weighted	6	-0.0909354	0.0281785	0.00125046	-0.146165	-0.0357054	0.913077	0.864015	0.964924	0.605446	0.404507	TRUE	0.0181695
BCAC_iCOGS	Adenosine 5'-monophosphate (AMP) to inosine 5'-monophosphate (IMP) ratio	Wald ratio	rs1354034	-0.11037	0.0903884	0.222064	-0.287531	0.0667917	0.895503	0.750114	1.06907	NA	NA	NA	0.56177
BCAC_iCOGS	Adenosine 5'-monophosphate (AMP) to proline ratio	Wald ratio	rs2540644	-0.0795573	0.105848	0.452281	-0.28702	0.127905	0.923525	0.750497	1.13645	NA	NA	NA	0.777968
BCAC_iCOGS	Adenosine 5'-monophosphate (AMP) to serine ratio	Inverse variance weighted	2	-0.13681	0.0908553	0.132119	-0.314886	0.0412665	0.872136	0.729872	1.04213	NA	NA	NA	0.435402
BCAC_iCOGS	Adenosine 5'-monophosphate (AMP) to urate ratio	Inverse variance weighted	5	-0.148771	0.0560855	0.00798815	-0.258698	-0.0388431	0.861767	0.772056	0.961902	0.374477	0.304478	TRUE	0.0666143
BCAC_iCOGS	Adipoylcarnitine (C6-DC) levels	Inverse variance weighted	12	0.0315798	0.0263444	0.230633	-0.0200552	0.0832147	1.03208	0.980145	1.08678	NA	NA	NA	0.574485
BCAC_iCOGS	Adrenate (22:4n6) levels	Inverse variance weighted	2	0.00204743	0.0536424	0.969554	-0.103092	0.107187	1.00205	0.902044	1.11314	NA	NA	NA	0.99135
BCAC_iCOGS	Alanine to asparagine ratio	Inverse variance weighted	18	0.048672	0.0226139	0.0313733	0.00434879	0.0929953	1.04988	1.00436	1.09746	0.961284	0.438964	TRUE	0.176982
BCAC_iCOGS	Alliin levels	Inverse variance weighted	13	0.0580768	0.0174056	0.000847869	0.0239619	0.0921918	1.0598	1.02425	1.09658	0.326959	0.261785	TRUE	0.0151945
BCAC_iCOGS	Alpha-hydroxyisovalerate levels	Inverse variance weighted	10	0.0537733	0.0401101	0.180037	-0.0248426	0.132389	1.05525	0.975463	1.14155	NA	NA	NA	0.503023
BCAC_iCOGS	Alpha-ketobutyrate to 3-methyl-2-oxobutyrate ratio	Wald ratio	rs10014755	-0.175635	0.0867309	0.0428617	-0.345627	-0.00564233	0.838924	0.707776	0.994374	NA	NA	TRUE	0.216338
BCAC_iCOGS	Alpha-ketobutyrate to 3-methyl-2-oxovalerate ratio	Wald ratio	rs7661312	-0.160918	0.10499	0.125351	-0.366698	0.0448625	0.851362	0.693019	1.04588	NA	NA	NA	0.424059
BCAC_iCOGS	Alpha-ketobutyrate to 4-methyl-2-oxopentanoate ratio	Wald ratio	rs7661312	-0.142622	0.0930532	0.125351	-0.325007	0.039762	0.867081	0.722522	1.04056	NA	NA	NA	0.424059
BCAC_iCOGS	Alpha-ketoglutaramate levels	Inverse variance weighted	4	-0.0537828	0.0368641	0.144579	-0.126036	0.0184707	0.947638	0.881583	1.01864	NA	NA	NA	0.460267
BCAC_iCOGS	Alpha-ketoglutarate levels	Inverse variance weighted	3	0.139279	0.0635877	0.0284992	0.0146471	0.263911	1.14944	1.01475	1.30201	0.309186	0.757243	TRUE	0.164643
BCAC_iCOGS	Alpha-ketoglutarate to alanine ratio	Wald ratio	rs6124830	0.0813379	0.115716	0.482113	-0.145466	0.308142	1.08474	0.864619	1.36089	NA	NA	NA	0.790753
BCAC_iCOGS	Alpha-ketoglutarate to aspartate ratio	Inverse variance weighted	2	-0.0633071	0.0665537	0.341494	-0.193752	0.0671381	0.938655	0.823862	1.06944	NA	NA	NA	0.689458
BCAC_iCOGS	Alpha-ketoglutarate to kynurenine ratio	Inverse variance weighted	3	0.0198222	0.0585485	0.73494	-0.0949328	0.134577	1.02002	0.909434	1.14405	NA	NA	NA	0.89659
BCAC_iCOGS	Alpha-ketoglutarate to ornithine ratio	Wald ratio	rs6124830	0.0931541	0.132527	0.482113	-0.166598	0.352906	1.09763	0.84654	1.4232	NA	NA	NA	0.790753
BCAC_iCOGS	Alpha-ketoglutarate to proline ratio	Inverse variance weighted	10	0.0181266	0.0371102	0.625229	-0.0546093	0.0908625	1.01829	0.946855	1.09512	NA	NA	NA	0.849284
BCAC_iCOGS	Alpha-ketoglutarate to pyruvate ratio	Inverse variance weighted	3	0.0715982	0.0722709	0.321836	-0.0700528	0.213249	1.07422	0.932345	1.23769	NA	NA	NA	0.687397
BCAC_iCOGS	Alpha-ketoglutarate to succinate ratio	Wald ratio	rs75459113	0.0409058	0.149943	0.785	-0.252983	0.334795	1.04175	0.776481	1.39765	NA	NA	NA	0.913931
BCAC_iCOGS	Alpha-ketoglutarate to trans-4-hydroxyproline ratio	Wald ratio	rs3761097	0.268187	0.143637	0.0618857	-0.0133419	0.549716	1.30759	0.986747	1.73276	NA	NA	NA	0.263442
BCAC_iCOGS	Alpha-tocopherol levels	Inverse variance weighted	3	-0.00629259	0.0691592	0.927503	-0.141845	0.129259	0.993727	0.867756	1.13799	NA	NA	NA	0.974662
BCAC_iCOGS	Andro steroid monosulfate C19H28O6S (1) levels	Inverse variance weighted	38	-0.0812387	0.0143025	1.34663e-08	-0.109272	-0.0532058	0.921974	0.896487	0.948185	0.0742503	0.093631	TRUE	1.84488e-06
BCAC_iCOGS	Androstenediol (3alpha, 17alpha) monosulfate (3) levels	Inverse variance weighted	42	0.0266334	0.0125738	0.0341615	0.00198868	0.0512781	1.02699	1.00199	1.05262	0.428082	0.00342888	TRUE	0.187205
BCAC_iCOGS	Androstenediol (3beta,17beta) disulfate (1) levels	Inverse variance weighted	9	0.0201168	0.028636	0.482368	-0.0360098	0.0762433	1.02032	0.964631	1.07923	NA	NA	NA	0.790753
BCAC_iCOGS	Androstenediol (3beta,17beta) disulfate (2) levels	Inverse variance weighted	6	-0.0207331	0.0543532	0.702868	-0.127265	0.0857991	0.97948	0.8805	1.08959	NA	NA	NA	0.888723
BCAC_iCOGS	Androstenediol (3beta,17beta) monosulfate (1) levels	Inverse variance weighted	5	0.104361	0.0424293	0.0139072	0.0211999	0.187523	1.11	1.02143	1.20626	0.632569	0.383546	TRUE	0.100278
BCAC_iCOGS	Androstenediol (3beta,17beta) monosulfate (2) levels	Inverse variance weighted	9	0.057115	0.0368213	0.120868	-0.0150548	0.129285	1.05878	0.985058	1.13801	NA	NA	NA	0.42227
BCAC_iCOGS	Androsterone glucuronide levels	Inverse variance weighted	46	0.00325248	0.00876091	0.710452	-0.0139189	0.0204239	1.00326	0.986178	1.02063	NA	NA	NA	0.888723
BCAC_iCOGS	Androsterone glucuronide to etiocholanolone glucuronide ratio	Inverse variance weighted	78	0.008869	0.00861483	0.303243	-0.00801607	0.0257541	1.00891	0.992016	1.02609	NA	NA	NA	0.675247
BCAC_iCOGS	Androsterone sulfate levels	Inverse variance weighted	40	0.0285241	0.00811818	0.000442054	0.0126125	0.0444358	1.02893	1.01269	1.04544	0.548159	0.820101	TRUE	0.0107816
BCAC_iCOGS	Arabitol_xylitol levels	Wald ratio	rs72861763	0.149936	0.134306	0.264262	-0.113304	0.413177	1.16176	0.892879	1.51161	NA	NA	NA	0.625567
BCAC_iCOGS	Arabonate_xylonate levels	Inverse variance weighted	3	-0.0248469	0.0663626	0.708098	-0.154918	0.105224	0.975459	0.856486	1.11096	NA	NA	NA	0.888723
BCAC_iCOGS	Arachidonate (20:4n6) levels	Inverse variance weighted	12	0.0182635	0.0242216	0.450838	-0.0292108	0.0657378	1.01843	0.971212	1.06795	NA	NA	NA	0.777968
BCAC_iCOGS	Arachidonate (20:4n6) to caffeine ratio	Wald ratio	rs174566	0.03718	0.115362	0.747232	-0.188929	0.263289	1.03788	0.827846	1.3012	NA	NA	NA	0.902349
BCAC_iCOGS	Arachidonate (20:4n6) to linoleate (18:2n6) ratio	Inverse variance weighted	14	2.5485e-05	0.0198252	0.998974	-0.0388318	0.0388828	1.00003	0.961912	1.03965	NA	NA	NA	0.998974
BCAC_iCOGS	Arachidonate (20:4n6) to oleate to vaccenate (18:1) ratio	Inverse variance weighted	17	0.00373243	0.0214776	0.862036	-0.0383636	0.0458285	1.00374	0.962363	1.04689	NA	NA	NA	0.949091
BCAC_iCOGS	Arachidonate (20:4n6) to paraxanthine ratio	Inverse variance weighted	2	-0.00480222	0.0595593	0.935737	-0.121538	0.111934	0.995209	0.885557	1.11844	NA	NA	NA	0.97707
BCAC_iCOGS	Arachidonate (20:4n6) to pyruvate ratio	Inverse variance weighted	6	0.00576428	0.0333191	0.86265	-0.0595411	0.0710697	1.00578	0.942197	1.07366	NA	NA	NA	0.949091
BCAC_iCOGS	Arachidonoylcarnitine (C20:4) levels	Inverse variance weighted	50	-0.0323793	0.0181539	0.0744887	-0.0679609	0.00320234	0.968139	0.934297	1.00321	NA	NA	NA	0.29889
BCAC_iCOGS	Arachidonoylcholine levels	Inverse variance weighted	2	0.0255592	0.0535383	0.633077	-0.0793758	0.130494	1.02589	0.923693	1.13939	NA	NA	NA	0.857516
BCAC_iCOGS	Arachidoylcarnitine (C20) levels	Inverse variance weighted	9	-0.189946	0.0467109	4.7741e-05	-0.281499	-0.0983927	0.827004	0.754651	0.906293	0.0282939	0.0521592	TRUE	0.00176091
BCAC_iCOGS	Argininate levels	Inverse variance weighted	11	0.0234381	0.035477	0.508833	-0.0460969	0.0929731	1.02371	0.954949	1.09743	NA	NA	NA	0.802924
BCAC_iCOGS	Arginine levels	Inverse variance weighted	4	-0.03283	0.0484936	0.498408	-0.127877	0.0622175	0.967703	0.879961	1.06419	NA	NA	NA	0.797422
BCAC_iCOGS	Arginine to citrulline ratio	Inverse variance weighted	5	-0.0145963	0.0517468	0.777889	-0.11602	0.0868275	0.98551	0.890457	1.09071	NA	NA	NA	0.909673
BCAC_iCOGS	Arginine to glutamate ratio	Wald ratio	rs62354638	-0.0607117	0.139174	0.662671	-0.333493	0.212069	0.941094	0.716417	1.23623	NA	NA	NA	0.868052
BCAC_iCOGS	Arginine to ornithine ratio	Inverse variance weighted	6	-0.0748096	0.043254	0.0837123	-0.159587	0.00996827	0.92792	0.852495	1.01002	NA	NA	NA	0.329017
BCAC_iCOGS	Arginine to phosphate ratio	Inverse variance weighted	4	-0.0335926	0.0511913	0.511685	-0.133928	0.0667424	0.966965	0.874653	1.06902	NA	NA	NA	0.804681
BCAC_iCOGS	Ascorbic acid 2-sulfate levels	Inverse variance weighted	9	-0.0670105	0.0498319	0.178712	-0.164681	0.03066	0.935185	0.848164	1.03113	NA	NA	NA	0.502441
BCAC_iCOGS	Ascorbic acid 3-sulfate levels	Inverse variance weighted	2	-0.092996	0.174835	0.594789	-0.435672	0.24968	0.911197	0.64683	1.28361	NA	NA	NA	0.837596
BCAC_iCOGS	Aspartate levels	Inverse variance weighted	3	0.0376518	0.0752067	0.616622	-0.109753	0.185057	1.03837	0.896055	1.20329	NA	NA	NA	0.84801
BCAC_iCOGS	Aspartate to asparagine ratio	Inverse variance weighted	6	0.0601106	0.0413371	0.145903	-0.0209101	0.141131	1.06195	0.979307	1.15158	NA	NA	NA	0.460267
BCAC_iCOGS	Aspartate to citrate ratio	Wald ratio	rs1354034	0.108207	0.0886172	0.222064	-0.0654829	0.281896	1.11428	0.936615	1.32564	NA	NA	NA	0.56177
BCAC_iCOGS	Aspartate to citrulline ratio	Wald ratio	rs1354034	0.101285	0.0829482	0.222064	-0.0612939	0.263863	1.10659	0.940547	1.30195	NA	NA	NA	0.56177
BCAC_iCOGS	Aspartate to glutamate ratio	Inverse variance weighted	2	0.0495905	0.0838509	0.554244	-0.114757	0.213938	1.05084	0.891583	1.23855	NA	NA	NA	0.82204
BCAC_iCOGS	Aspartate to mannose ratio	Inverse variance weighted	6	0.0407805	0.0313935	0.19394	-0.0207507	0.102312	1.04162	0.979463	1.10773	NA	NA	NA	0.526857
BCAC_iCOGS	Aspartate to N-acetylglucosamine to N-acetylgalactosamine ratio	Inverse variance weighted	4	0.0654054	0.0423386	0.122391	-0.0175783	0.148389	1.06759	0.982575	1.15996	NA	NA	NA	0.42227
BCAC_iCOGS	Aspartate to phosphate ratio	Wald ratio	rs1354034	0.101497	0.0831222	0.222064	-0.0614224	0.264417	1.10683	0.940426	1.30267	NA	NA	NA	0.56177
BCAC_iCOGS	Behenoyl dihydrosphingomyelin (d18:0_22:0) levels	Inverse variance weighted	3	-0.144532	0.0567224	0.0108325	-0.255708	-0.0333559	0.865427	0.774368	0.967194	0.938751	0.889881	TRUE	0.0809262
BCAC_iCOGS	Behenoyl sphingomyelin (d18:1_22:0) levels	Wald ratio	rs10713262	-0.29104	0.145189	0.0450094	-0.57561	-0.00647058	0.747486	0.562362	0.99355	NA	NA	TRUE	0.221554
BCAC_iCOGS	Behenoylcarnitine (C22) levels	Inverse variance weighted	7	-0.045732	0.0327097	0.162078	-0.109843	0.018379	0.955298	0.895975	1.01855	NA	NA	NA	0.47973
BCAC_iCOGS	Benzoate to linoleoyl-arachidonoyl-glycerol (18:2 to 20:4) [1] ratio	Inverse variance weighted	4	0.0169419	0.0339499	0.617761	-0.0495999	0.0834836	1.01709	0.95161	1.08707	NA	NA	NA	0.84801
BCAC_iCOGS	Benzoate to linoleoyl-arachidonoyl-glycerol (18:2 to 20:4) [2] ratio	Inverse variance weighted	6	0.0290579	0.0304112	0.339326	-0.0305481	0.0886639	1.02948	0.969914	1.09271	NA	NA	NA	0.689458
BCAC_iCOGS	Benzoate to oleoyl-linoleoyl-glycerol (18:1 to 18:2) [2] ratio	Inverse variance weighted	4	0.0409003	0.0458338	0.372199	-0.0489339	0.130735	1.04175	0.952244	1.13967	NA	NA	NA	0.71045
BCAC_iCOGS	Beta-alanine levels	Inverse variance weighted	4	-0.0555405	0.0526976	0.291906	-0.158828	0.0477467	0.945974	0.853143	1.0489	NA	NA	NA	0.661793
BCAC_iCOGS	Beta-citrylglutamate levels	Inverse variance weighted	54	0.0450751	0.0107368	2.6905e-05	0.024031	0.0661192	1.04611	1.02432	1.06835	0.187135	0.843046	TRUE	0.00112182
BCAC_iCOGS	Beta-hydroxyisovalerate levels	Inverse variance weighted	7	-0.0442563	0.0670225	0.509049	-0.17562	0.0871078	0.956709	0.838936	1.09101	NA	NA	NA	0.802924
BCAC_iCOGS	Beta-hydroxyisovaleroylcarnitine levels	Inverse variance weighted	12	-0.0321181	0.0337404	0.341139	-0.0982493	0.0340132	0.968392	0.906423	1.0346	NA	NA	NA	0.689458
BCAC_iCOGS	Betaine levels	Inverse variance weighted	18	-0.0160898	0.0201125	0.423717	-0.0555104	0.0233308	0.984039	0.946002	1.02361	NA	NA	NA	0.765003
BCAC_iCOGS	Bilirubin (E,E) levels	Inverse variance weighted	38	0.00724624	0.0110792	0.513086	-0.014469	0.0289615	1.00727	0.985635	1.02938	NA	NA	NA	0.804681
BCAC_iCOGS	Bilirubin (E,Z or Z,E) levels	Inverse variance weighted	43	-0.000328816	0.0101791	0.97423	-0.0202798	0.0196222	0.999671	0.979924	1.01982	NA	NA	NA	0.99135
BCAC_iCOGS	Bilirubin (z,z) levels	Inverse variance weighted	46	0.00330975	0.00970489	0.733074	-0.0157118	0.0223313	1.00332	0.984411	1.02258	NA	NA	NA	0.896058
BCAC_iCOGS	Bilirubin (Z,Z) to androsterone glucuronide ratio	Inverse variance weighted	46	-0.00574833	0.00929578	0.536325	-0.0239681	0.0124714	0.994268	0.976317	1.01255	NA	NA	NA	0.819969
BCAC_iCOGS	Bilirubin (Z,Z) to etiocholanolone glucuronide ratio	Inverse variance weighted	38	0.000784921	0.0118679	0.947268	-0.0224761	0.024046	1.00079	0.977775	1.02434	NA	NA	NA	0.985282
BCAC_iCOGS	Bilirubin (Z,Z) to glucuronate ratio	Inverse variance weighted	21	-0.000902941	0.016525	0.956425	-0.033292	0.0314861	0.999097	0.967256	1.03199	NA	NA	NA	0.990472
BCAC_iCOGS	Bilirubin (Z,Z) to taurocholate ratio	Inverse variance weighted	3	-0.0407127	0.0418386	0.33051	-0.122716	0.0412911	0.960105	0.884514	1.04216	NA	NA	NA	0.687926
BCAC_iCOGS	Bilirubin degradation product, C16H18N2O5 (1) levels	Inverse variance weighted	34	0.00416726	0.0127922	0.744601	-0.0209054	0.0292399	1.00418	0.979312	1.02967	NA	NA	NA	0.901607
BCAC_iCOGS	Bilirubin degradation product, C16H18N2O5 (2) levels	Inverse variance weighted	31	0.00381917	0.0129147	0.767442	-0.0214936	0.0291319	1.00383	0.978736	1.02956	NA	NA	NA	0.906327
BCAC_iCOGS	Bilirubin degradation product, C16H18N2O5 (3) levels	Inverse variance weighted	32	0.000298187	0.0122047	0.980508	-0.023623	0.0242194	1.0003	0.976654	1.02452	NA	NA	NA	0.99135
BCAC_iCOGS	Bilirubin degradation product, C16H18N2O5 (4) levels	Inverse variance weighted	32	0.00194675	0.0125027	0.876264	-0.0225585	0.026452	1.00195	0.977694	1.0268	NA	NA	NA	0.958195
BCAC_iCOGS	Bilirubin degradation product, C17H18N2O4 (1) levels	Inverse variance weighted	40	-0.00608805	0.0119293	0.609811	-0.0294695	0.0172934	0.99393	0.97096	1.01744	NA	NA	NA	0.847549
BCAC_iCOGS	Bilirubin degradation product, C17H18N2O4 (2) levels	Inverse variance weighted	37	-0.000141264	0.0120165	0.99062	-0.0236935	0.023411	0.999859	0.976585	1.02369	NA	NA	NA	0.995812
BCAC_iCOGS	Bilirubin degradation product, C17H18N2O4 (3) levels	Inverse variance weighted	33	0.00506278	0.012471	0.684768	-0.0193803	0.0295059	1.00508	0.980806	1.02995	NA	NA	NA	0.876545
BCAC_iCOGS	Bilirubin degradation product, C17H20N2O5 (1) levels	Inverse variance weighted	19	-0.0201657	0.0177113	0.254879	-0.0548799	0.0145484	0.980036	0.946599	1.01465	NA	NA	NA	0.612603
BCAC_iCOGS	Bilirubin degradation product, C17H20N2O5 (2) levels	Inverse variance weighted	20	-0.012516	0.0176076	0.477191	-0.0470269	0.0219949	0.987562	0.954062	1.02224	NA	NA	NA	0.790373
BCAC_iCOGS	Biliverdin levels	Inverse variance weighted	38	0.00274929	0.0113965	0.809369	-0.0195879	0.0250865	1.00275	0.980603	1.0254	NA	NA	NA	0.922176
BCAC_iCOGS	Branched-chain, straight-chain, or cyclopropyl 12:1 fatty acid levels	Inverse variance weighted	7	-0.057581	0.0377212	0.126888	-0.131514	0.0163525	0.944045	0.876767	1.01649	NA	NA	NA	0.424059
BCAC_iCOGS	Butyrylglycine levels	Inverse variance weighted	11	0.0245394	0.0215908	0.255719	-0.0177785	0.0668573	1.02484	0.982379	1.06914	NA	NA	NA	0.613087
BCAC_iCOGS	C-glycosyltryptophan levels	Inverse variance weighted	2	0.217044	0.151956	0.153195	-0.0807893	0.514877	1.2424	0.922388	1.67343	NA	NA	NA	0.468672
BCAC_iCOGS	Caffeic acid sulfate levels	Inverse variance weighted	2	-0.121866	0.153067	0.425939	-0.421878	0.178146	0.885267	0.655814	1.195	NA	NA	NA	0.765003
BCAC_iCOGS	Caffeine to linoleate (18:2n6) ratio	Wald ratio	rs12548231	0.0957571	0.131365	0.466038	-0.161718	0.353232	1.10049	0.850681	1.42366	NA	NA	NA	0.786849
BCAC_iCOGS	Caffeine to paraxanthine ratio	Inverse variance weighted	11	-0.0683505	0.0313638	0.0293108	-0.129824	-0.00687748	0.933933	0.87825	0.993146	0.400869	0.540721	TRUE	0.167316
BCAC_iCOGS	Campesterol levels	Inverse variance weighted	8	0.00202786	0.0450071	0.964062	-0.0861861	0.0902418	1.00203	0.917424	1.09444	NA	NA	NA	0.99135
BCAC_iCOGS	Caprate (10:0) levels	Wald ratio	rs150572890	-0.0307797	0.14893	0.836266	-0.322683	0.261124	0.969689	0.724203	1.29839	NA	NA	NA	0.93235
BCAC_iCOGS	Caproate (6:0) levels	Inverse variance weighted	2	0.102409	0.0482314	0.0337296	0.00787565	0.196943	1.10784	1.00791	1.21767	0.444972	NA	TRUE	0.185901
BCAC_iCOGS	Caprylate (8:0) levels	Inverse variance weighted	3	0.156616	0.0566572	0.00570483	0.0455683	0.267664	1.16955	1.04662	1.30691	0.719056	0.578771	TRUE	0.0526051
BCAC_iCOGS	Carboxyethyl-gaba levels	Inverse variance weighted	7	-0.0537588	0.0379168	0.156246	-0.128076	0.0205581	0.947661	0.879787	1.02077	NA	NA	NA	0.474177
BCAC_iCOGS	Carnitine C14 levels	Inverse variance weighted	3	-0.336198	0.0566074	2.86546e-09	-0.447149	-0.225248	0.714481	0.639449	0.798318	0.690759	0.667566	TRUE	5.49595e-07
BCAC_iCOGS	Carnitine C18:2 levels	Inverse variance weighted	13	-0.0788611	0.0403281	0.0505254	-0.157904	0.000181918	0.924168	0.853932	1.00018	NA	NA	NA	0.238689
BCAC_iCOGS	Carnitine C4 levels	Inverse variance weighted	11	-0.0157873	0.0279722	0.572488	-0.0706129	0.0390383	0.984337	0.931823	1.03981	NA	NA	NA	0.82667
BCAC_iCOGS	Carnitine C5:1 levels	Wald ratio	rs7678928	-0.163237	0.0848271	0.0543109	-0.329498	0.00302421	0.84939	0.719285	1.00303	NA	NA	NA	0.246844
BCAC_iCOGS	Carnitine levels	Inverse variance weighted	24	0.028514	0.0222609	0.20023	-0.0151175	0.0721454	1.02892	0.984996	1.07481	NA	NA	NA	0.531913
BCAC_iCOGS	Carnitine to ergothioneine ratio	Inverse variance weighted	11	-0.153792	0.0385988	6.76631e-05	-0.229445	-0.0781378	0.857451	0.794974	0.924837	0.0269386	0.0048814	TRUE	0.00231746
BCAC_iCOGS	Carnitine to palmitoylcarnitine (C16) ratio	Inverse variance weighted	2	0.0358975	0.0661325	0.587259	-0.0937222	0.165517	1.03655	0.910536	1.18	NA	NA	NA	0.833109
BCAC_iCOGS	Carnitine to propionylcarnitine (C3) ratio	Inverse variance weighted	11	-0.0384099	0.0482882	0.426364	-0.133055	0.0562351	0.962318	0.875417	1.05785	NA	NA	NA	0.765003
BCAC_iCOGS	Carotene diol (1) levels	Inverse variance weighted	3	0.0410005	0.037476	0.273934	-0.0324524	0.114453	1.04185	0.968069	1.12126	NA	NA	NA	0.630128
BCAC_iCOGS	Carotene diol (2) levels	Wald ratio	rs12927647	0.022612	0.045987	0.622929	-0.0675226	0.112747	1.02287	0.934707	1.11935	NA	NA	NA	0.848926
BCAC_iCOGS	Carotene diol (3) levels	Wald ratio	rs12927647	0.0250807	0.0510078	0.622929	-0.0748946	0.125056	1.0254	0.927841	1.13321	NA	NA	NA	0.848926
BCAC_iCOGS	Catechol sulfate levels	Wald ratio	rs143550070	0.0263412	0.172829	0.878862	-0.312404	0.365087	1.02669	0.731686	1.44064	NA	NA	NA	0.959511
BCAC_iCOGS	Ceramide (d18:1_14:0, d16:1_16:0) levels	Inverse variance weighted	6	-0.0240853	0.0348327	0.48928	-0.0923574	0.0441869	0.976202	0.911779	1.04518	NA	NA	NA	0.793941
BCAC_iCOGS	Ceramide (d18:1_16:0) levels	Wald ratio	rs964184	0.0140976	0.117363	0.904388	-0.215933	0.244128	1.0142	0.805789	1.27651	NA	NA	NA	0.96695
BCAC_iCOGS	Ceramide (d18:1_17:0, d17:1_18:0) levels	Inverse variance weighted	2	-0.0766719	0.0678719	0.258622	-0.209701	0.0563571	0.926194	0.810827	1.05798	NA	NA	NA	0.618499
BCAC_iCOGS	Ceramide (d18:1_24:1) levels	Inverse variance weighted	14	0.0184754	0.0318842	0.562283	-0.0440177	0.0809685	1.01865	0.956937	1.08434	NA	NA	NA	0.822367
BCAC_iCOGS	Cerotoylcarnitine (C26) levels	Inverse variance weighted	26	-0.0758974	0.0311039	0.0146821	-0.136861	-0.0149338	0.926911	0.872091	0.985177	1.7688e-07	3.30651e-05	TRUE	0.104864
BCAC_iCOGS	Cholate levels	Wald ratio	rs11076828	-0.0128679	0.16105	0.936316	-0.328525	0.30279	0.987214	0.719985	1.35363	NA	NA	NA	0.97707
BCAC_iCOGS	Cholate to bilirubin (Z,Z) ratio	Inverse variance weighted	2	0.0338443	0.0386431	0.381129	-0.0418961	0.109585	1.03442	0.958969	1.11581	NA	NA	NA	0.72223
BCAC_iCOGS	Cholesterol levels	Wald ratio	rs1168041	-0.0807436	0.119655	0.4998	-0.315267	0.15378	0.92243	0.729594	1.16623	NA	NA	NA	0.797517
BCAC_iCOGS	Cholesterol to cortisol ratio	Wald ratio	rs9989237	0.065574	0.103396	0.52595	-0.137083	0.268231	1.06777	0.871898	1.30765	NA	NA	NA	0.816158
BCAC_iCOGS	Cholesterol to linoleoyl-arachidonoyl-glycerol (18:2 to 20:4) [1] ratio	Inverse variance weighted	7	0.0599051	0.0339459	0.0776108	-0.00662895	0.126439	1.06174	0.993393	1.13478	NA	NA	NA	0.308833
BCAC_iCOGS	Cholesterol to linoleoyl-arachidonoyl-glycerol (18:2 to 20:4) [2] ratio	Inverse variance weighted	5	0.0185564	0.0305441	0.543501	-0.0413101	0.0784229	1.01873	0.959532	1.08158	NA	NA	NA	0.819969
BCAC_iCOGS	Cholesterol to oleoyl-linoleoyl-glycerol (18:1 to 18:2) [2] ratio	Inverse variance weighted	10	0.0345051	0.0571471	0.545981	-0.0775032	0.146513	1.03511	0.925424	1.15779	NA	NA	NA	0.819969
BCAC_iCOGS	Cholic acid glucuronide levels	Inverse variance weighted	3	-0.0279859	0.0369794	0.449172	-0.100466	0.0444938	0.972402	0.904416	1.0455	NA	NA	NA	0.777968
BCAC_iCOGS	Choline levels	Inverse variance weighted	3	-0.128555	0.0683463	0.0599802	-0.262514	0.00540353	0.879365	0.769116	1.00542	NA	NA	NA	0.25883
BCAC_iCOGS	Choline phosphate to choline ratio	Inverse variance weighted	3	0.052067	0.0891392	0.559147	-0.122646	0.22678	1.05345	0.884577	1.25455	NA	NA	NA	0.822367
BCAC_iCOGS	Choline phosphate to phosphoethanolamine ratio	Inverse variance weighted	2	-0.0497886	0.0930525	0.592609	-0.232171	0.132594	0.951431	0.79281	1.14179	NA	NA	NA	0.835753
BCAC_iCOGS	Choline to taurocholate ratio	Inverse variance weighted	3	-0.00713355	0.081129	0.929934	-0.166146	0.151879	0.992892	0.846922	1.16402	NA	NA	NA	0.975085
BCAC_iCOGS	Cinnamoylglycine levels	Inverse variance weighted	3	0.0723327	0.0512979	0.158525	-0.0282112	0.172877	1.07501	0.972183	1.18872	NA	NA	NA	0.475079
BCAC_iCOGS	Cis-3,4-methyleneheptanoylcarnitine levels	Inverse variance weighted	14	0.059242	0.030172	0.0495909	0.000104882	0.118379	1.06103	1.0001	1.12567	0.193885	0.3461	TRUE	0.236605
BCAC_iCOGS	Cis-3,4-methyleneheptanoylglycine levels	Inverse variance weighted	19	0.0232521	0.0232849	0.317994	-0.0223864	0.0688905	1.02352	0.977862	1.07132	NA	NA	NA	0.687397
BCAC_iCOGS	Cis-4-decenoate (10:1n6) levels	Inverse variance weighted	40	-0.0126992	0.0161032	0.430339	-0.0442615	0.0188631	0.987381	0.956704	1.01904	NA	NA	NA	0.765003
BCAC_iCOGS	Cis-4-decenoylcarnitine (C10:1) levels	Inverse variance weighted	34	0.0469346	0.0157909	0.00295621	0.0159844	0.0778848	1.04805	1.01611	1.081	0.0247314	0.932247	TRUE	0.033353
BCAC_iCOGS	Cis 3,4-methyleneheptanoate levels	Wald ratio	rs1564348	-0.00174116	0.0967926	0.985648	-0.191455	0.187972	0.99826	0.825757	1.2068	NA	NA	NA	0.992895
BCAC_iCOGS	Citrate levels	Inverse variance weighted	8	0.0334876	0.0421996	0.427456	-0.0492235	0.116199	1.03405	0.951968	1.12322	NA	NA	NA	0.765003
BCAC_iCOGS	Citrate to 4-hydroxyphenylpyruvate ratio	Wald ratio	rs807669	0.0248041	0.122618	0.839692	-0.215526	0.265135	1.02511	0.806117	1.30361	NA	NA	NA	0.934181
BCAC_iCOGS	Citrate to oxalate (ethanedioate) ratio	Inverse variance weighted	4	-0.0766426	0.0559847	0.171002	-0.186373	0.0330874	0.926221	0.829964	1.03364	NA	NA	NA	0.492465
BCAC_iCOGS	Citrate to taurocholate ratio	Wald ratio	rs76149982	-0.148338	0.166111	0.371852	-0.473916	0.177239	0.862139	0.62256	1.19392	NA	NA	NA	0.71045
BCAC_iCOGS	Citrulline levels	Inverse variance weighted	4	0.0211307	0.0581233	0.716194	-0.092791	0.135052	1.02136	0.911384	1.1446	NA	NA	NA	0.888723
BCAC_iCOGS	Citrulline to dimethylarginine (SDMA + ADMA) ratio	Inverse variance weighted	7	-0.00533734	0.0539351	0.921171	-0.11105	0.100376	0.994677	0.894894	1.10559	NA	NA	NA	0.972911
BCAC_iCOGS	Citrulline to ornithine ratio	Wald ratio	rs17788484	-0.014594	0.131294	0.911494	-0.271931	0.242743	0.985512	0.761907	1.27474	NA	NA	NA	0.96695
BCAC_iCOGS	Citrulline to phosphate ratio	Wald ratio	rs7580046	-0.116917	0.108465	0.281068	-0.329509	0.0956744	0.889659	0.719277	1.1004	NA	NA	NA	0.641771
BCAC_iCOGS	Cortisol levels (plasma)	Wald ratio	rs4491436	-0.0767549	0.104197	0.461345	-0.280981	0.127471	0.926117	0.755043	1.13595	NA	NA	NA	0.785966
BCAC_iCOGS	Cortisol to taurocholate ratio	Wald ratio	rs4731512	-0.0581216	0.118597	0.62408	-0.290572	0.174329	0.943535	0.747836	1.19045	NA	NA	NA	0.848926
BCAC_iCOGS	Cortolone glucuronide (1) levels	Inverse variance weighted	10	0.117239	0.0345129	0.00068138	0.0495938	0.184884	1.12439	1.05084	1.20308	0.614842	0.345455	TRUE	0.0139031
BCAC_iCOGS	Creatine levels	Inverse variance weighted	4	0.058746	0.0428142	0.170028	-0.0251698	0.142662	1.06051	0.975144	1.15334	NA	NA	NA	0.491134
BCAC_iCOGS	Creatine to carnitine ratio	Inverse variance weighted	6	0.0621217	0.0372201	0.0951101	-0.0108297	0.135073	1.06409	0.989229	1.14462	NA	NA	NA	0.361947
BCAC_iCOGS	Creatinine levels	Wald ratio	rs77924615	0.0563947	0.140537	0.688213	-0.219057	0.331846	1.05802	0.803276	1.39354	NA	NA	NA	0.877655
BCAC_iCOGS	Cys-gly, oxidized levels	Inverse variance weighted	48	0.0294188	0.0100598	0.00345121	0.00970163	0.0491359	1.02986	1.00975	1.05036	0.397198	0.34667	TRUE	0.0363704
BCAC_iCOGS	Cystathionine levels	Inverse variance weighted	2	0.0612079	0.0741998	0.409425	-0.0842238	0.20664	1.06312	0.919226	1.22954	NA	NA	NA	0.755074
BCAC_iCOGS	Cysteine-glutathione disulfide levels	Inverse variance weighted	6	-0.0148574	0.0353944	0.674656	-0.0842305	0.0545157	0.985252	0.919219	1.05603	NA	NA	NA	0.871961
BCAC_iCOGS	Cysteine to 5-oxoproline ratio	Inverse variance weighted	9	-0.0220266	0.0226898	0.331662	-0.0664987	0.0224454	0.978214	0.935664	1.0227	NA	NA	NA	0.687926
BCAC_iCOGS	Cysteinylglycine disulfide levels	Inverse variance weighted	36	0.0336728	0.0142285	0.0179537	0.00578491	0.0615608	1.03425	1.0058	1.0635	0.30184	0.17602	TRUE	0.121113
BCAC_iCOGS	Cysteinylglycine levels	Inverse variance weighted	17	0.0919312	0.0203769	6.43577e-06	0.0519925	0.13187	1.09629	1.05337	1.14096	0.589144	0.748447	TRUE	0.000363053
BCAC_iCOGS	Cysteinylglycine to glutamate ratio	Inverse variance weighted	4	0.103252	0.0673607	0.125319	-0.0287748	0.235279	1.10877	0.971635	1.26526	NA	NA	NA	0.424059
BCAC_iCOGS	Cysteinylglycine to taurine ratio	Inverse variance weighted	6	0.112221	0.0362633	0.00197072	0.0411447	0.183297	1.11876	1.042	1.20117	0.823768	0.808965	TRUE	0.0242297
BCAC_iCOGS	Cytidine levels	Wald ratio	rs72754978	-0.173826	0.106538	0.102767	-0.382639	0.0349884	0.840444	0.682059	1.03561	NA	NA	NA	0.381989
BCAC_iCOGS	Cytidine to N-acetylglucosamine to N-acetylgalactosamine ratio	Inverse variance weighted	3	-0.0313371	0.0732799	0.668916	-0.174966	0.112291	0.969149	0.839486	1.11884	NA	NA	NA	0.868052
BCAC_iCOGS	Cytidine to N-acetylneuraminate ratio	Inverse variance weighted	3	-0.117084	0.0632435	0.0641241	-0.241041	0.00687356	0.889511	0.785809	1.0069	NA	NA	NA	0.26737
BCAC_iCOGS	Decadienedioic acid (C10:2-DC) levels	Inverse variance weighted	87	-0.0181579	0.00750812	0.0155873	-0.0328739	-0.00344202	0.982006	0.967661	0.996564	0.777932	0.469455	TRUE	0.109111
BCAC_iCOGS	Decanoylcarnitine (C10) levels	Inverse variance weighted	23	0.0619849	0.0238062	0.00922159	0.0153247	0.108645	1.06395	1.01544	1.11477	0.00381959	0.952979	TRUE	0.0743151
BCAC_iCOGS	Delta-CEHC levels	Wald ratio	rs2108622	-0.0610595	0.101877	0.548944	-0.260739	0.13862	0.940767	0.770482	1.14869	NA	NA	NA	0.819969
BCAC_iCOGS	Deoxycarnitine levels	Inverse variance weighted	4	0.051979	0.0666851	0.435703	-0.0787237	0.182682	1.05335	0.924295	1.20043	NA	NA	NA	0.765003
BCAC_iCOGS	Deoxycholate levels	Wald ratio	rs10107182	-0.271348	0.105466	0.0100866	-0.478061	-0.0646345	0.762351	0.619984	0.93741	NA	NA	TRUE	0.0778659
BCAC_iCOGS	Deoxycholic acid 12-sulfate levels	Inverse variance weighted	7	0.0343174	0.0225117	0.127403	-0.00980562	0.0784404	1.03491	0.990242	1.0816	NA	NA	NA	0.424059
BCAC_iCOGS	Deoxycholic acid glucuronide levels	Inverse variance weighted	59	-0.0180577	0.013748	0.189024	-0.0450038	0.00888849	0.982104	0.955994	1.00893	NA	NA	NA	0.519409
BCAC_iCOGS	DHEAS levels	Inverse variance weighted	8	0.105733	0.0342711	0.00203411	0.038562	0.172905	1.11153	1.03932	1.18875	0.87602	0.882353	TRUE	0.0246926
BCAC_iCOGS	Dihomo-linolenate (20:3n3 or n6) levels	Inverse variance weighted	2	0.117401	0.160424	0.464281	-0.19703	0.431832	1.12457	0.821166	1.54008	NA	NA	NA	0.785966
BCAC_iCOGS	Dihomo-linolenoylcarnitine (C20:3n3 or 6) levels	Inverse variance weighted	45	-0.0362144	0.0191508	0.0586232	-0.0737501	0.00132125	0.964433	0.928904	1.00132	NA	NA	NA	0.25592
BCAC_iCOGS	Dihomo-linoleoylcarnitine (C20:2) levels	Inverse variance weighted	11	-0.0913414	0.0456844	0.0455651	-0.180883	-0.00179995	0.912706	0.834533	0.998202	0.000184347	0.477195	TRUE	0.222944
BCAC_iCOGS	Dihydroorotate levels	Inverse variance weighted	20	-0.0493702	0.0227821	0.0302301	-0.0940232	-0.0047173	0.951829	0.910262	0.995294	0.0948653	0.898678	TRUE	0.171543
BCAC_iCOGS	Dimethyl sulfone levels	Inverse variance weighted	2	-0.177421	0.108403	0.101698	-0.389891	0.0350491	0.837427	0.677131	1.03567	NA	NA	NA	0.379487
BCAC_iCOGS	Dimethylarginine (sdma + adma) levels	Inverse variance weighted	4	0.0200307	0.069701	0.773821	-0.116583	0.156645	1.02023	0.889956	1.16958	NA	NA	NA	0.908487
BCAC_iCOGS	Dimethylglycine levels	Inverse variance weighted	19	-0.020997	0.0216898	0.333016	-0.0635091	0.0215151	0.979222	0.938466	1.02175	NA	NA	NA	0.687926
BCAC_iCOGS	Docosahexaenoate DHA; 22:6n3 levels	Wald ratio	rs174603	-0.164788	0.124963	0.187272	-0.409716	0.0801399	0.848073	0.663839	1.08344	NA	NA	NA	0.516074
BCAC_iCOGS	Docosahexaenoylcarnitine (C22:6) levels	Inverse variance weighted	3	-0.125924	0.134508	0.349181	-0.389559	0.137712	0.881682	0.677355	1.14765	NA	NA	NA	0.698498
BCAC_iCOGS	Docosapentaenoate (n6 DPA; 22:5n6) levels	Inverse variance weighted	2	0.0761845	0.137664	0.579982	-0.193636	0.346005	1.07916	0.823958	1.41341	NA	NA	NA	0.828916
BCAC_iCOGS	Docosapentaenoate n3 DPA; 22:5n3 levels	Wald ratio	rs4246215	0.00269993	0.0777925	0.972314	-0.149773	0.155173	1.0027	0.860903	1.16786	NA	NA	NA	0.99135
BCAC_iCOGS	Docosatrienoate (22:3n3) levels	Inverse variance weighted	3	0.0600944	0.0453673	0.185298	-0.0288255	0.149014	1.06194	0.971586	1.16069	NA	NA	NA	0.513585
BCAC_iCOGS	Docosatrienoate (22:3n6) levels	Wald ratio	rs174533	0.0149623	0.0576407	0.795189	-0.0980134	0.127938	1.01507	0.906637	1.13648	NA	NA	NA	0.91657
BCAC_iCOGS	Dodecadienoate (12:2) levels	Inverse variance weighted	14	-0.0434675	0.0296366	0.142462	-0.101555	0.0146203	0.957464	0.903431	1.01473	NA	NA	NA	0.458461
BCAC_iCOGS	Dodecanedioate levels	Inverse variance weighted	2	0.0374854	0.0716868	0.60104	-0.103021	0.177991	1.0382	0.902108	1.19482	NA	NA	NA	0.841457
BCAC_iCOGS	Dodecenedioate (C12:1-DC) levels	Inverse variance weighted	11	-0.0340652	0.0307481	0.267913	-0.0943314	0.026201	0.966508	0.909981	1.02655	NA	NA	NA	0.628501
BCAC_iCOGS	Dopamine 3-o-sulfate levels	Inverse variance weighted	2	-0.113511	0.137214	0.408091	-0.382451	0.155428	0.892694	0.682187	1.16816	NA	NA	NA	0.754064
BCAC_iCOGS	Dopamine 4-sulfate levels	Wald ratio	rs145261788	0.205721	0.152631	0.177712	-0.0934355	0.504878	1.22841	0.910797	1.65678	NA	NA	NA	0.502441
BCAC_iCOGS	Dopamine 4-sulfate to dopamine 3-O-sulfate ratio	Inverse variance weighted	2	-0.0382842	0.0972007	0.693679	-0.228798	0.152229	0.962439	0.79549	1.16443	NA	NA	NA	0.88345
BCAC_iCOGS	Eicosanedioate (C20-DC) levels	Wald ratio	rs60953408	-0.0878154	0.138372	0.525668	-0.359025	0.183394	0.91593	0.698357	1.20129	NA	NA	NA	0.816158
BCAC_iCOGS	Eicosapentaenoate (EPA; 20:5n3) levels	Inverse variance weighted	3	0.0266295	0.0452631	0.556313	-0.0620862	0.115345	1.02699	0.939802	1.12226	NA	NA	NA	0.82204
BCAC_iCOGS	Eicosenoylcarnitine (C20:1) levels	Inverse variance weighted	4	-0.0547458	0.135608	0.686429	-0.320538	0.211046	0.946726	0.725759	1.23497	NA	NA	NA	0.876545
BCAC_iCOGS	Epiandrosterone sulfate levels	Inverse variance weighted	31	0.0278572	0.00944678	0.00318951	0.00934152	0.0463729	1.02825	1.00939	1.04746	0.572785	0.656552	TRUE	0.0355668
BCAC_iCOGS	Ergothioneine levels	Inverse variance weighted	8	0.179737	0.0458275	8.78046e-05	0.0899152	0.269559	1.1969	1.09408	1.30939	0.0437447	0.011454	TRUE	0.00276778
BCAC_iCOGS	Erucate (22:1n9) levels	Inverse variance weighted	2	-0.0670479	0.0978051	0.493012	-0.258746	0.12465	0.93515	0.772019	1.13275	NA	NA	NA	0.796311
BCAC_iCOGS	Erythritol levels in elite athletes	Inverse variance weighted	9	-0.0358236	0.0256812	0.163034	-0.0861587	0.0145114	0.96481	0.917449	1.01462	NA	NA	NA	0.480666
BCAC_iCOGS	Erythronate levels	Inverse variance weighted	10	0.102454	0.0347907	0.00323098	0.034264	0.170643	1.10789	1.03486	1.18607	0.36493	0.0825483	TRUE	0.0356151
BCAC_iCOGS	Ethyl beta-glucopyranoside levels	Inverse variance weighted	8	-0.0144779	0.0333466	0.664168	-0.0798372	0.0508813	0.985626	0.923267	1.0522	NA	NA	NA	0.868052
BCAC_iCOGS	Ethylmalonate levels	Inverse variance weighted	17	-0.0603159	0.016879	0.000352328	-0.0933987	-0.0272331	0.941467	0.91083	0.973134	0.997055	0.324481	TRUE	0.00913196
BCAC_iCOGS	Etiocholanolone glucuronide levels	Inverse variance weighted	39	-0.00660874	0.0110111	0.548381	-0.0281905	0.014973	0.993413	0.972203	1.01509	NA	NA	NA	0.819969
BCAC_iCOGS	Eugenol sulfate levels	Inverse variance weighted	3	0.0590842	0.0667707	0.376221	-0.0717864	0.189955	1.06086	0.93073	1.20919	NA	NA	NA	0.715864
BCAC_iCOGS	Ferulic acid 4-sulfate levels	Inverse variance weighted	7	-0.00813776	0.0230512	0.724066	-0.053318	0.0370425	0.991895	0.948078	1.03774	NA	NA	NA	0.891002
BCAC_iCOGS	Flavin adenine dinucleotide (FAD) levels	Inverse variance weighted	20	-0.0600549	0.0161139	0.000193857	-0.0916382	-0.0284716	0.941713	0.912435	0.97193	0.897834	0.535625	TRUE	0.00563359
BCAC_iCOGS	Furaneol sulfate levels	Inverse variance weighted	4	-0.0254801	0.0315695	0.419602	-0.0873562	0.0363961	0.974842	0.916351	1.03707	NA	NA	NA	0.765003
BCAC_iCOGS	Galactonate levels	Inverse variance weighted	9	0.0124388	0.0373175	0.73889	-0.0607034	0.085581	1.01252	0.941102	1.08935	NA	NA	NA	0.899232
BCAC_iCOGS	Gamma-CEHC glucuronide levels	Inverse variance weighted	2	-0.0165935	0.0520175	0.749728	-0.118548	0.0853609	0.983543	0.888209	1.08911	NA	NA	NA	0.902349
BCAC_iCOGS	Gamma-CEHC levels	Inverse variance weighted	8	-0.0087757	0.0282054	0.755697	-0.0640582	0.0465068	0.991263	0.93795	1.04761	NA	NA	NA	0.902349
BCAC_iCOGS	Gamma-glutamyl-2-aminobutyrate levels	Inverse variance weighted	3	0.059282	0.138154	0.667851	-0.211501	0.330065	1.06107	0.809369	1.39106	NA	NA	NA	0.868052
BCAC_iCOGS	Gamma-glutamyl-alpha-lysine levels	Inverse variance weighted	2	-0.0577487	0.097545	0.553836	-0.248937	0.133439	0.943887	0.779629	1.14275	NA	NA	NA	0.82204
BCAC_iCOGS	Gamma-glutamylalanine levels	Inverse variance weighted	2	-0.0693319	0.101682	0.495334	-0.268629	0.129965	0.933017	0.764427	1.13879	NA	NA	NA	0.797022
BCAC_iCOGS	Gamma-glutamylcitrulline levels	Inverse variance weighted	4	-0.0294199	0.0587332	0.616436	-0.144537	0.0856972	0.971009	0.865423	1.08948	NA	NA	NA	0.84801
BCAC_iCOGS	Gamma-glutamylglutamate levels	Inverse variance weighted	3	-0.0694158	0.0722832	0.336888	-0.211091	0.0722592	0.932939	0.809701	1.07493	NA	NA	NA	0.689458
BCAC_iCOGS	Gamma-glutamylglutamine levels	Inverse variance weighted	2	-0.0473577	0.0757522	0.531863	-0.195832	0.101117	0.953746	0.82215	1.10641	NA	NA	NA	0.819969
BCAC_iCOGS	Gamma-glutamylglycine levels	Inverse variance weighted	27	0.0336905	0.0166171	0.0426158	0.00112093	0.06626	1.03426	1.00112	1.0685	0.0992814	0.467079	TRUE	0.216235
BCAC_iCOGS	Gamma-glutamylhistidine levels	Wald ratio	rs715	-0.224243	0.120334	0.0623918	-0.460099	0.0116122	0.799121	0.631221	1.01168	NA	NA	NA	0.263442
BCAC_iCOGS	Gamma-glutamylisoleucine levels	Wald ratio	rs4049869	0.0375812	0.122443	0.758899	-0.202408	0.27757	1.0383	0.816762	1.31992	NA	NA	NA	0.902349
BCAC_iCOGS	Gamma-glutamylthreonine levels	Inverse variance weighted	4	-0.0169817	0.0543753	0.754808	-0.123557	0.0895938	0.983162	0.883771	1.09373	NA	NA	NA	0.902349
BCAC_iCOGS	Gamma-glutamyltryptophan levels	Inverse variance weighted	2	0.173817	0.142017	0.220984	-0.104536	0.45217	1.18984	0.900742	1.57172	NA	NA	NA	0.56177
BCAC_iCOGS	Gamma-glutamyltyrosine levels	Inverse variance weighted	9	0.194025	0.0469706	3.61555e-05	0.101962	0.286087	1.21413	1.10734	1.33121	0.0864978	0.222038	TRUE	0.00144472
BCAC_iCOGS	Gamma-glutamylvaline levels	Inverse variance weighted	4	-0.0145066	0.0192129	0.450222	-0.052164	0.0231507	0.985598	0.949173	1.02342	NA	NA	NA	0.777968
BCAC_iCOGS	Gluconate levels	Inverse variance weighted	4	-0.0826192	0.049064	0.0921999	-0.178785	0.0135463	0.920702	0.836286	1.01364	NA	NA	NA	0.355037
BCAC_iCOGS	Glucose-to-mannose ratio	Inverse variance weighted	21	0.00513342	0.0166718	0.758151	-0.0275433	0.0378102	1.00515	0.972833	1.03853	NA	NA	NA	0.902349
BCAC_iCOGS	Glucose to N-palmitoyl-sphinganine (d18:0 to 16:0) ratio	Inverse variance weighted	2	-0.00614979	0.0860315	0.943013	-0.174772	0.162472	0.993869	0.839649	1.17642	NA	NA	NA	0.982989
BCAC_iCOGS	Glucose to N-stearoyl-sphingosine (d18:1 to 18:0) ratio	Inverse variance weighted	5	0.0133321	0.0495565	0.787907	-0.0837986	0.110463	1.01342	0.919616	1.11679	NA	NA	NA	0.913931
BCAC_iCOGS	Glucuronate to androsterone glucuronide ratio	Inverse variance weighted	23	-0.0153628	0.0155803	0.324112	-0.0459001	0.0151745	0.984755	0.955137	1.01529	NA	NA	NA	0.687926
BCAC_iCOGS	Glucuronate to etiocholanolone glucuronide ratio	Inverse variance weighted	24	0.0155793	0.0180385	0.38777	-0.0197762	0.0509348	1.0157	0.980418	1.05225	NA	NA	NA	0.73203
BCAC_iCOGS	Glucuronide of C12H22O4 (1) levels	Wald ratio	rs12491981	-0.103922	0.109152	0.341055	-0.31786	0.110016	0.901296	0.727705	1.1163	NA	NA	NA	0.689458
BCAC_iCOGS	Glucuronide of piperine metabolite C17H21NO3 (3) levels	Wald ratio	rs174695	-0.091163	0.0636478	0.152057	-0.215913	0.0335867	0.912869	0.805806	1.03416	NA	NA	NA	0.46738
BCAC_iCOGS	Glucuronide of piperine metabolite C17H21NO3 (4) levels	Inverse variance weighted	3	-0.0433976	0.0472143	0.358011	-0.135938	0.0491425	0.957531	0.872897	1.05037	NA	NA	NA	0.707903
BCAC_iCOGS	Glucuronide of piperine metabolite C17H21NO3 (5) levels	Wald ratio	rs174695	-0.0866853	0.0605216	0.152057	-0.205308	0.031937	0.916966	0.814397	1.03245	NA	NA	NA	0.46738
BCAC_iCOGS	Glutamate levels	Wald ratio	rs62354638	0.0532568	0.122085	0.662671	-0.186029	0.292543	1.0547	0.83025	1.33983	NA	NA	NA	0.868052
BCAC_iCOGS	Glutamate to 5-oxoproline ratio	Inverse variance weighted	4	-0.039769	0.0471706	0.399179	-0.132223	0.0526854	0.961011	0.876145	1.0541	NA	NA	NA	0.744772
BCAC_iCOGS	Glutamate to alanine ratio	Wald ratio	rs62354638	0.0549878	0.126053	0.662671	-0.192075	0.302051	1.05653	0.825245	1.35263	NA	NA	NA	0.868052
BCAC_iCOGS	Glutamate to cysteine ratio	Inverse variance weighted	2	-0.109297	0.171542	0.524032	-0.44552	0.226926	0.896464	0.640491	1.25474	NA	NA	NA	0.815823
BCAC_iCOGS	Glutamate to glutamine ratio	Inverse variance weighted	2	-0.0964331	0.16864	0.567437	-0.426967	0.2341	0.908071	0.652485	1.26377	NA	NA	NA	0.82667
BCAC_iCOGS	Glutamate to kynurenine ratio	Wald ratio	rs62354638	0.053711	0.123126	0.662671	-0.187615	0.295037	1.05518	0.828933	1.34318	NA	NA	NA	0.868052
BCAC_iCOGS	Glutamine conjugate of C6H10O2 (1) levels	Inverse variance weighted	3	-0.0614106	0.0538281	0.253927	-0.166914	0.0440925	0.940437	0.846273	1.04508	NA	NA	NA	0.611848
BCAC_iCOGS	Glutamine conjugate of C6H10O2 (2) levels	Inverse variance weighted	3	-0.0644735	0.0583712	0.269358	-0.178881	0.049934	0.937561	0.836205	1.0512	NA	NA	NA	0.628501
BCAC_iCOGS	Glutamine conjugate of C7H12O2 levels	Inverse variance weighted	3	-0.101048	0.0617343	0.101669	-0.222047	0.0199515	0.90389	0.800878	1.02015	NA	NA	NA	0.379487
BCAC_iCOGS	Glutamine degradant levels	Inverse variance weighted	13	-0.0858531	0.0324346	0.0081218	-0.149425	-0.0222814	0.917729	0.861203	0.977965	0.530203	0.630218	TRUE	0.0671449
BCAC_iCOGS	Glutamine levels	Inverse variance weighted	2	-0.0431013	0.0782596	0.581806	-0.19649	0.110287	0.957814	0.821609	1.1166	NA	NA	NA	0.829052
BCAC_iCOGS	Glutamine to alanine ratio	Inverse variance weighted	2	-0.0362975	0.0830729	0.662158	-0.19912	0.126525	0.964353	0.819451	1.13488	NA	NA	NA	0.868052
BCAC_iCOGS	Glutamine to asparagine ratio	Inverse variance weighted	29	0.034293	0.0150448	0.0226441	0.00480511	0.0637809	1.03489	1.00482	1.06586	0.541761	0.437652	TRUE	0.139203
BCAC_iCOGS	Glutarate (C5-DC) levels	Wald ratio	rs3092098	0.103954	0.144495	0.471875	-0.179256	0.387165	1.10955	0.835892	1.4728	NA	NA	NA	0.788377
BCAC_iCOGS	Glutarylcarnitine (c5-dc) levels	Inverse variance weighted	52	0.00479863	0.0132243	0.716705	-0.0211209	0.0307182	1.00481	0.979101	1.03119	NA	NA	NA	0.888723
BCAC_iCOGS	Glycerate levels	Inverse variance weighted	3	0.038992	0.0697727	0.576269	-0.0977626	0.175747	1.03976	0.906864	1.19214	NA	NA	NA	0.82667
BCAC_iCOGS	Glycerol 3-phosphate levels	Inverse variance weighted	14	0.00631422	0.0307055	0.837074	-0.0538685	0.066497	1.00633	0.947557	1.06876	NA	NA	NA	0.93235
BCAC_iCOGS	Glycerol to carnitine ratio	Inverse variance weighted	2	-0.0281651	0.0925557	0.760896	-0.209574	0.153244	0.972228	0.810929	1.16561	NA	NA	NA	0.902349
BCAC_iCOGS	Glycerol to glycerol 3-phosphate ratio	Inverse variance weighted	2	0.00647773	0.147188	0.964897	-0.282012	0.294967	1.0065	0.754265	1.34308	NA	NA	NA	0.99135
BCAC_iCOGS	Glycerol to palmitoylcarnitine (C16) ratio	Inverse variance weighted	3	0.196991	0.103196	0.0562755	-0.00527376	0.399256	1.21773	0.99474	1.49072	NA	NA	NA	0.249003
BCAC_iCOGS	Glycerophosphoethanolamine levels	Inverse variance weighted	3	0.0367746	0.143577	0.79785	-0.244637	0.318186	1.03746	0.782989	1.37463	NA	NA	NA	0.917119
BCAC_iCOGS	Glycerophosphorylcholine (GPC) levels	Wald ratio	rs77692382	0.318952	0.103597	0.00207862	0.115901	0.522002	1.37568	1.12288	1.6854	NA	NA	TRUE	0.0249174
BCAC_iCOGS	Glycine conjugate of C10H12O2 levels	Inverse variance weighted	5	0.0289253	0.0581239	0.618732	-0.0849976	0.142848	1.02935	0.918514	1.15355	NA	NA	NA	0.84801
BCAC_iCOGS	Glycine conjugate of C10H14O2 (1) levels	Inverse variance weighted	15	-0.0132122	0.0203791	0.516779	-0.0531553	0.0267309	0.986875	0.948233	1.02709	NA	NA	NA	0.807151
BCAC_iCOGS	Glycine levels	Inverse variance weighted	37	0.0317619	0.0116556	0.00642964	0.00891686	0.0546069	1.03227	1.00896	1.05613	0.440943	0.786603	TRUE	0.0565691
BCAC_iCOGS	Glycine to alanine ratio	Inverse variance weighted	21	0.0360484	0.0151734	0.0175128	0.0063085	0.0657882	1.03671	1.00633	1.068	0.777638	0.789714	TRUE	0.119112
BCAC_iCOGS	Glycine to phosphate ratio	Inverse variance weighted	29	0.0310067	0.0135999	0.0226127	0.00435083	0.0576626	1.03149	1.00436	1.05936	0.343648	0.744276	TRUE	0.139203
BCAC_iCOGS	Glycine to pyridoxal ratio	Inverse variance weighted	9	0.0730862	0.0258929	0.00476314	0.022336	0.123836	1.07582	1.02259	1.13183	0.370122	0.776311	TRUE	0.047002
BCAC_iCOGS	Glycine to serine ratio	Inverse variance weighted	25	0.024611	0.0151577	0.104446	-0.005098	0.0543201	1.02492	0.994915	1.05582	NA	NA	NA	0.385247
BCAC_iCOGS	Glyco-beta-muricholate levels	Inverse variance weighted	18	-0.0452354	0.0145	0.00181049	-0.0736554	-0.0168153	0.955773	0.928992	0.983325	0.706486	0.673983	TRUE	0.023293
BCAC_iCOGS	Glycochenodeoxycholate 3-sulfate levels	Inverse variance weighted	14	-0.00541333	0.0241995	0.822994	-0.0528444	0.0420177	0.994601	0.948528	1.04291	NA	NA	NA	0.926351
BCAC_iCOGS	Glycochenodeoxycholate glucuronide (1) levels	Inverse variance weighted	7	0.0268527	0.0187435	0.151962	-0.00988469	0.06359	1.02722	0.990164	1.06566	NA	NA	NA	0.46738
BCAC_iCOGS	Glycocholenate sulfate levels	Inverse variance weighted	21	0.0337798	0.0138546	0.0147619	0.00662484	0.0609348	1.03436	1.00665	1.06283	0.552929	0.582254	TRUE	0.104864
BCAC_iCOGS	Glycodeoxycholate 3-sulfate levels	Inverse variance weighted	9	0.0241694	0.0178264	0.175156	-0.0107703	0.0591091	1.02446	0.989287	1.06089	NA	NA	NA	0.502441
BCAC_iCOGS	Glycohyocholate levels	Inverse variance weighted	5	-0.0537987	0.0536233	0.31573	-0.1589	0.051303	0.947623	0.853081	1.05264	NA	NA	NA	0.687397
BCAC_iCOGS	Glycolithocholate sulfate levels	Inverse variance weighted	6	0.0502904	0.037317	0.177769	-0.0228508	0.123432	1.05158	0.977408	1.13137	NA	NA	NA	0.502441
BCAC_iCOGS	Glycolithocholate to glycolithocholate sulfate ratio	Inverse variance weighted	4	0.0526992	0.048032	0.272567	-0.0414435	0.146842	1.05411	0.959404	1.15817	NA	NA	NA	0.630128
BCAC_iCOGS	Glycosyl-N-(2-hydroxynervonoyl)-sphingosine (d18:1_24:1(2OH)) levels	Inverse variance weighted	19	0.00562782	0.0243315	0.817084	-0.042062	0.0533177	1.00564	0.95881	1.05476	NA	NA	NA	0.924037
BCAC_iCOGS	Glycosyl-N-behenoyl-sphingadienine (d18:2_22:0) levels	Inverse variance weighted	15	-0.0657118	0.0244594	0.00721905	-0.113652	-0.0177714	0.936401	0.892568	0.982386	0.73985	0.844132	TRUE	0.06237
BCAC_iCOGS	Glycosyl-N-palmitoyl-sphingosine (d18:1_16:0) levels	Inverse variance weighted	16	-0.0608204	0.0261334	0.0199493	-0.112042	-0.00959882	0.940992	0.894007	0.990447	0.300562	0.561374	TRUE	0.127542
BCAC_iCOGS	Glycosyl-N-stearoyl-sphingosine (d18:1_18:0) levels	Inverse variance weighted	11	-0.0597656	0.0353779	0.0911529	-0.129106	0.00957513	0.941985	0.878881	1.00962	NA	NA	NA	0.352482
BCAC_iCOGS	Glycosyl-N-tricosanoyl-sphingadienine (d18:2_23:0) levels	Inverse variance weighted	6	-0.0504371	0.0379668	0.184029	-0.124852	0.0239778	0.950814	0.882627	1.02427	NA	NA	NA	0.511547
BCAC_iCOGS	Glycosyl ceramide (d18:1_20:0, d16:1_22:0) levels	Inverse variance weighted	21	-0.0498542	0.0214968	0.020387	-0.091988	-0.00772054	0.951368	0.912116	0.992309	0.477495	0.351574	TRUE	0.128626
BCAC_iCOGS	Glycosyl ceramide (d18:1_23:1, d17:1_24:1) levels	Inverse variance weighted	4	-0.0728921	0.0494334	0.140333	-0.169782	0.0239974	0.929701	0.843849	1.02429	NA	NA	NA	0.454662
BCAC_iCOGS	Glycosyl ceramide (d18:2_24:1, d18:1_24:2) levels	Inverse variance weighted	13	-0.048834	0.03387	0.149356	-0.115219	0.0175511	0.952339	0.891171	1.01771	NA	NA	NA	0.466556
BCAC_iCOGS	Glycoursodeoxycholic acid sulfate (1) levels	Wald ratio	rs212100	-0.070752	0.0760028	0.351898	-0.219717	0.0782134	0.931693	0.802746	1.08135	NA	NA	NA	0.700146
BCAC_iCOGS	Guanidinoacetate levels	Inverse variance weighted	6	-0.0371838	0.0446474	0.404938	-0.124693	0.050325	0.963499	0.882768	1.05161	NA	NA	NA	0.752171
BCAC_iCOGS	Gulonate levels	Inverse variance weighted	2	0.218671	0.113302	0.0536096	-0.00340158	0.440743	1.24442	0.996604	1.55386	NA	NA	NA	0.245988
BCAC_iCOGS	Hexadecanedioate (C16-DC) levels	Inverse variance weighted	6	0.0439428	0.0201516	0.0292122	0.00444565	0.08344	1.04492	1.00446	1.08702	0.804672	0.524549	TRUE	0.167316
BCAC_iCOGS	Hexadecenedioate (C16:1-DC) levels	Inverse variance weighted	2	0.0412755	0.0174716	0.0181551	0.00703126	0.0755198	1.04214	1.00706	1.07844	0.760018	NA	TRUE	0.121113
BCAC_iCOGS	Hexanoylcarnitine levels (Biocrates platform)	Inverse variance weighted	38	0.0428303	0.0156536	0.00621656	0.0121493	0.0735113	1.04376	1.01222	1.07628	0.00109688	0.680962	TRUE	0.0562422
BCAC_iCOGS	Hexanoylglutamine levels	Inverse variance weighted	42	0.00950712	0.0133578	0.476634	-0.0166742	0.0356884	1.00955	0.983464	1.03633	NA	NA	NA	0.790373
BCAC_iCOGS	Hexanoylglycine levels	Inverse variance weighted	19	0.0536366	0.0161117	0.000871427	0.0220577	0.0852154	1.0551	1.0223	1.08895	0.305796	0.70138	TRUE	0.0151945
BCAC_iCOGS	Histidine betaine (hercynine) levels	Inverse variance weighted	4	0.156755	0.10036	0.118305	-0.0399507	0.353461	1.16971	0.960837	1.42399	NA	NA	NA	0.417113
BCAC_iCOGS	Histidine levels	Inverse variance weighted	2	-0.189868	0.0910529	0.0370464	-0.368332	-0.0114046	0.827068	0.691887	0.98866	0.562777	NA	TRUE	0.193084
BCAC_iCOGS	Histidine to alanine ratio	Wald ratio	rs1260326	-0.0536991	0.125087	0.66771	-0.29887	0.191472	0.947717	0.741656	1.21103	NA	NA	NA	0.868052
BCAC_iCOGS	Histidine to asparagine ratio	Inverse variance weighted	21	0.0609234	0.0211137	0.0039081	0.0195405	0.102306	1.06282	1.01973	1.10772	0.262266	0.439984	TRUE	0.0390403
BCAC_iCOGS	Histidine to glutamine ratio	Wald ratio	rs1047891	-0.221064	0.140134	0.114676	-0.495727	0.0535986	0.801665	0.609128	1.05506	NA	NA	NA	0.405809
BCAC_iCOGS	Histidine to phosphate ratio	Wald ratio	rs12132412	-0.0829415	0.148579	0.576686	-0.374156	0.208273	0.920405	0.687869	1.23155	NA	NA	NA	0.82667
BCAC_iCOGS	Histidine to pyruvate ratio	Inverse variance weighted	3	-0.00875481	0.0680533	0.897637	-0.142139	0.12463	0.991283	0.8675	1.13273	NA	NA	NA	0.96695
BCAC_iCOGS	Histidine to trans-urocanate ratio	Wald ratio	rs2247570	-0.0274048	0.0975536	0.778772	-0.21861	0.1638	0.972967	0.803635	1.17798	NA	NA	NA	0.909673
BCAC_iCOGS	Homoarginine levels	Inverse variance weighted	24	-0.0193727	0.0161312	0.229771	-0.0509899	0.0122444	0.980814	0.950288	1.01232	NA	NA	NA	0.574485
BCAC_iCOGS	Homocitrulline levels	Inverse variance weighted	13	0.0210546	0.0249539	0.398814	-0.027855	0.0699643	1.02128	0.972529	1.07247	NA	NA	NA	0.744772
BCAC_iCOGS	Homostachydrine levels	Inverse variance weighted	9	-0.171428	0.0533949	0.00132474	-0.276082	-0.0667738	0.842461	0.758751	0.935407	0.00119278	0.0489718	TRUE	0.0189615
BCAC_iCOGS	Hydantoin-5-propionate levels	Inverse variance weighted	3	-0.0834348	0.0657319	0.204327	-0.212269	0.0453996	0.919951	0.808747	1.04645	NA	NA	NA	0.541296
BCAC_iCOGS	Hydroxy-cmpf levels	Inverse variance weighted	2	0.0574149	0.0794669	0.469987	-0.0983403	0.21317	1.0591	0.90634	1.2376	NA	NA	NA	0.787967
BCAC_iCOGS	Hydroxypalmitoyl sphingomyelin (d18:1_16:0(OH)) levels	Inverse variance weighted	7	-0.0220233	0.0377693	0.559826	-0.0960511	0.0520045	0.978217	0.908418	1.05338	NA	NA	NA	0.822367
BCAC_iCOGS	Hypotaurine levels	Inverse variance weighted	5	0.0200893	0.054384	0.711832	-0.0865034	0.126682	1.02029	0.917132	1.13506	NA	NA	NA	0.888723
BCAC_iCOGS	Hypotaurine to cysteine ratio	Inverse variance weighted	6	0.0355671	0.0479828	0.458544	-0.0584792	0.129613	1.03621	0.943198	1.13839	NA	NA	NA	0.785256
BCAC_iCOGS	Hypotaurine to taurine ratio	Inverse variance weighted	4	0.0695058	0.0634876	0.273608	-0.05493	0.193941	1.07198	0.946551	1.21403	NA	NA	NA	0.630128
BCAC_iCOGS	Imidazole lactate levels	Inverse variance weighted	43	0.00351541	0.0113697	0.757175	-0.0187691	0.0258	1.00352	0.981406	1.02614	NA	NA	NA	0.902349
BCAC_iCOGS	Indoleacetate levels	Inverse variance weighted	4	-0.117087	0.0590105	0.0472365	-0.232747	-0.00142648	0.889508	0.792354	0.998575	0.763583	0.477091	TRUE	0.228787
BCAC_iCOGS	Indoleacetoylcarnitine levels	Inverse variance weighted	25	0.0184373	0.0240626	0.443545	-0.0287255	0.0656001	1.01861	0.971683	1.0678	NA	NA	NA	0.774782
BCAC_iCOGS	Indoleacetylglutamine levels	Inverse variance weighted	15	0.0674768	0.0257395	0.00875364	0.0170274	0.117926	1.06981	1.01717	1.12516	0.282198	0.0153366	TRUE	0.0717499
BCAC_iCOGS	Indolebutyrate levels	Inverse variance weighted	7	0.0211057	0.0497607	0.671461	-0.0764253	0.118637	1.02133	0.926422	1.12596	NA	NA	NA	0.869003
BCAC_iCOGS	Indolelactate levels	Inverse variance weighted	4	0.000251325	0.0695104	0.997115	-0.135989	0.136492	1.00025	0.872852	1.14625	NA	NA	NA	0.998449
BCAC_iCOGS	Indolepropionate levels	Inverse variance weighted	11	0.00160822	0.0316602	0.959488	-0.0604457	0.0636621	1.00161	0.941345	1.06573	NA	NA	NA	0.990472
BCAC_iCOGS	Indolin-2-one levels	Inverse variance weighted	2	0.0497196	0.0734184	0.498274	-0.0941805	0.19362	1.05098	0.910118	1.21363	NA	NA	NA	0.797422
BCAC_iCOGS	Isobutyrylcarnitine (c4) levels	Inverse variance weighted	26	0.0253717	0.0144394	0.0788973	-0.00292946	0.0536729	1.0257	0.997075	1.05514	NA	NA	NA	0.312655
BCAC_iCOGS	Isobutyrylglycine levels	Inverse variance weighted	8	0.0734761	0.0316805	0.0203796	0.0113823	0.13557	1.07624	1.01145	1.14519	0.398601	0.91378	TRUE	0.128626
BCAC_iCOGS	Isoursodeoxycholate levels	Wald ratio	rs3756669	0.00267445	0.117962	0.981912	-0.228531	0.23388	1.00268	0.795702	1.26349	NA	NA	NA	0.99135
BCAC_iCOGS	Isovalerylcarnitine (C5) levels	Inverse variance weighted	14	-0.150707	0.03847	8.94694e-05	-0.226108	-0.0753054	0.8601	0.797632	0.92746	0.00195178	0.0262103	TRUE	0.00276778
BCAC_iCOGS	Isovalerylglycine levels	Inverse variance weighted	5	0.121559	0.0375278	0.00119878	0.0480045	0.195114	1.12926	1.04918	1.21545	0.43944	0.304845	TRUE	0.0179629
BCAC_iCOGS	Kynurenate levels	Inverse variance weighted	10	0.0248087	0.0304309	0.414932	-0.034836	0.0844533	1.02512	0.965764	1.08812	NA	NA	NA	0.760842
BCAC_iCOGS	Kynurenine levels	Inverse variance weighted	7	-0.0575952	0.0575601	0.317016	-0.170413	0.0552227	0.944032	0.843316	1.05678	NA	NA	NA	0.687397
BCAC_iCOGS	Lactosyl-N-palmitoyl-sphingosine (d18:1_16:0) levels	Inverse variance weighted	6	0.0418113	0.0410423	0.308327	-0.0386315	0.122254	1.0427	0.962105	1.13004	NA	NA	NA	0.678179
BCAC_iCOGS	Laurylcarnitine levels	Inverse variance weighted	2	-0.094956	0.0927495	0.305934	-0.276745	0.086833	0.909413	0.758248	1.09071	NA	NA	NA	0.675247
BCAC_iCOGS	Leucine to phosphate ratio	Wald ratio	rs10227729	-0.303862	0.129811	0.0192428	-0.558292	-0.0494314	0.737963	0.572185	0.95177	NA	NA	TRUE	0.123851
BCAC_iCOGS	Levulinoylcarnitine levels	Inverse variance weighted	5	0.0220628	0.0436326	0.613102	-0.0634571	0.107583	1.02231	0.938514	1.11358	NA	NA	NA	0.84801
BCAC_iCOGS	Lignoceroyl sphingomyelin (d18:1_24:0) levels	Inverse variance weighted	2	0.0825307	0.0916403	0.367804	-0.0970842	0.262146	1.08603	0.90748	1.29972	NA	NA	NA	0.71045
BCAC_iCOGS	Lignoceroylcarnitine (C24) levels	Inverse variance weighted	21	-0.065382	0.0285827	0.0221685	-0.121404	-0.00935993	0.93671	0.885676	0.990684	4.96737e-05	0.00205453	TRUE	0.138049
BCAC_iCOGS	Linolenoylcarnitine (C18:3) levels	Inverse variance weighted	6	-0.116899	0.0868341	0.178227	-0.287094	0.0532957	0.889675	0.750441	1.05474	NA	NA	NA	0.502441
BCAC_iCOGS	Linoleoyl-arachidonoyl-glycerol (18:2_20:4) [1] levels	Inverse variance weighted	16	-0.0553459	0.0208018	0.00779941	-0.0961174	-0.0145744	0.946158	0.908357	0.985531	0.507469	0.345331	TRUE	0.0661873
BCAC_iCOGS	Linoleoyl-arachidonoyl-glycerol (18:2_20:4) [2] levels	Inverse variance weighted	16	-0.0705949	0.0251625	0.00502293	-0.119913	-0.0212764	0.931839	0.886997	0.978948	0.154193	0.0631663	TRUE	0.0481699
BCAC_iCOGS	Linoleoyl ethanolamide levels	Inverse variance weighted	2	-0.102243	0.0510147	0.0450501	-0.202232	-0.00225414	0.90281	0.816905	0.997748	0.989632	NA	TRUE	0.221554
BCAC_iCOGS	Lithocholate sulfate (1) levels	Wald ratio	rs10425975	-0.058587	0.0621478	0.345832	-0.180397	0.0632227	0.943096	0.834939	1.06526	NA	NA	NA	0.695289
BCAC_iCOGS	Lysine levels	Inverse variance weighted	11	-0.0251376	0.0378143	0.5062	-0.0992536	0.0489783	0.975176	0.905513	1.0502	NA	NA	NA	0.802924
BCAC_iCOGS	Malate levels	Inverse variance weighted	3	-0.0428982	0.0443961	0.333914	-0.129915	0.0441182	0.958009	0.87817	1.04511	NA	NA	NA	0.687926
BCAC_iCOGS	Maltotriose levels	Wald ratio	rs72670481	0.157827	0.111927	0.158516	-0.0615513	0.377205	1.17096	0.940305	1.4582	NA	NA	NA	0.475079
BCAC_iCOGS	Mannonate levels	Inverse variance weighted	9	0.0101882	0.0262158	0.697551	-0.0411948	0.0615712	1.01024	0.959642	1.06351	NA	NA	NA	0.886084
BCAC_iCOGS	Mannose levels	Inverse variance weighted	16	-0.00579453	0.0196844	0.768474	-0.0443759	0.0327868	0.994222	0.956594	1.03333	NA	NA	NA	0.906327
BCAC_iCOGS	Mannose to fructose ratio	Inverse variance weighted	3	-0.0526033	0.0656111	0.422701	-0.181201	0.0759944	0.948756	0.834268	1.07896	NA	NA	NA	0.765003
BCAC_iCOGS	Mannose to glycerol ratio	Inverse variance weighted	5	-0.0130304	0.0398158	0.743466	-0.0910694	0.0650086	0.987054	0.912954	1.06717	NA	NA	NA	0.901607
BCAC_iCOGS	Mannose to mannitol to sorbitol ratio	Wald ratio	rs780094	-0.031935	0.116957	0.784816	-0.261171	0.197301	0.96857	0.770149	1.21811	NA	NA	NA	0.913931
BCAC_iCOGS	Mannose to N-acetylglucosamine to N-acetylgalactosamine ratio	Inverse variance weighted	10	0.000622681	0.0237599	0.979092	-0.0459467	0.0471921	1.00062	0.955093	1.04832	NA	NA	NA	0.99135
BCAC_iCOGS	Mannose to S-methylcysteine ratio	Inverse variance weighted	4	-0.0630838	0.0398295	0.113229	-0.14115	0.014982	0.938865	0.868359	1.01509	NA	NA	NA	0.405809
BCAC_iCOGS	Mannose to trans-4-hydroxyproline ratio	Inverse variance weighted	3	0.00745055	0.0646935	0.908313	-0.119349	0.13425	1.00748	0.887498	1.14368	NA	NA	NA	0.96695
BCAC_iCOGS	Margaroylcarnitine (C17) levels	Inverse variance weighted	3	-0.216513	0.111795	0.0527824	-0.435632	0.00260521	0.805322	0.646856	1.00261	NA	NA	NA	0.244596
BCAC_iCOGS	Metabolonic lactone sulfate levels	Inverse variance weighted	59	0.0106268	0.0106652	0.319055	-0.010277	0.0315306	1.01068	0.989776	1.03203	NA	NA	NA	0.687397
BCAC_iCOGS	Methionine sulfone levels	Inverse variance weighted	34	0.0365637	0.0136706	0.00748124	0.00976938	0.0633581	1.03724	1.00982	1.06541	0.591587	0.00587225	TRUE	0.0640581
BCAC_iCOGS	Methionine to methionine sulfoxide ratio	Wald ratio	rs4710080	-0.103446	0.126739	0.414379	-0.351855	0.144963	0.901724	0.703382	1.156	NA	NA	NA	0.760842
BCAC_iCOGS	Methyl-4-hydroxybenzoate sulfate levels	Wald ratio	rs12443580	0.247695	0.169624	0.144219	-0.0847686	0.580159	1.28107	0.918725	1.78632	NA	NA	NA	0.460267
BCAC_iCOGS	Methyl glucopyranoside (alpha + beta) levels	Inverse variance weighted	9	-0.0153805	0.030661	0.615927	-0.0754761	0.0447151	0.984737	0.927302	1.04573	NA	NA	NA	0.84801
BCAC_iCOGS	Methylsuccinate levels	Wald ratio	rs610803	-0.18374	0.126829	0.147415	-0.432325	0.0648447	0.832152	0.648998	1.06699	NA	NA	NA	0.461996
BCAC_iCOGS	Methylsuccinoylcarnitine levels	Inverse variance weighted	17	-0.0275891	0.0229859	0.230039	-0.0726415	0.0174634	0.972788	0.929934	1.01762	NA	NA	NA	0.574485
BCAC_iCOGS	Myo-inositol levels	Inverse variance weighted	3	-0.342522	0.183975	0.0626327	-0.703113	0.0180682	0.709977	0.495042	1.01823	NA	NA	NA	0.263442
BCAC_iCOGS	Myristoyl dihydrosphingomyelin (d18:0_14:0) levels	Inverse variance weighted	2	-0.0160286	0.128353	0.900619	-0.2676	0.235543	0.984099	0.765214	1.2656	NA	NA	NA	0.96695
BCAC_iCOGS	N-acetyl-1-methylhistidine levels	Inverse variance weighted	64	-0.0218844	0.0064838	0.00073752	-0.0345926	-0.00917612	0.978353	0.965999	0.990866	0.873377	0.145561	TRUE	0.0139515
BCAC_iCOGS	N-acetyl-2-aminoadipate levels	Inverse variance weighted	12	-0.0607101	0.0182186	0.00086125	-0.0964185	-0.0250017	0.941096	0.908084	0.975308	0.969061	0.451318	TRUE	0.0151945
BCAC_iCOGS	N-acetyl-2-aminooctanoate levels	Inverse variance weighted	38	-0.0285734	0.0121112	0.0183121	-0.0523114	-0.00483536	0.971831	0.949033	0.995176	0.515605	0.0120624	TRUE	0.121113
BCAC_iCOGS	N-acetyl-3-methylhistidine levels	Inverse variance weighted	11	-0.0575194	0.01753	0.00103364	-0.0918782	-0.0231607	0.944104	0.912216	0.977105	0.516784	0.615945	TRUE	0.0168834
BCAC_iCOGS	N-acetyl-aspartyl-glutamate (naag) levels	Inverse variance weighted	369	-0.00363455	0.00261421	0.164436	-0.00875839	0.00148929	0.996372	0.99128	1.00149	NA	NA	NA	0.480773
BCAC_iCOGS	N-acetyl-beta-alanine levels	Inverse variance weighted	7	0.0652805	0.0439552	0.137502	-0.0208718	0.151433	1.06746	0.979345	1.1635	NA	NA	NA	0.450049
BCAC_iCOGS	N-acetyl-isoputreanine levels	Inverse variance weighted	26	-0.0399132	0.0160869	0.0130976	-0.0714435	-0.00838294	0.960873	0.931049	0.991652	0.939813	0.324217	TRUE	0.0958823
BCAC_iCOGS	N-acetyl-L-alanine levels	Inverse variance weighted	2	0.192712	0.277312	0.4871	-0.350819	0.736243	1.21253	0.704111	2.08808	NA	NA	NA	0.792786
BCAC_iCOGS	N-acetyl-L-glutamine levels	Inverse variance weighted	61	-0.0191099	0.00651469	0.00335325	-0.0318787	-0.00634108	0.981072	0.968624	0.993679	0.896251	0.00353647	TRUE	0.0361322
BCAC_iCOGS	N-acetylalliin levels	Inverse variance weighted	4	-0.105852	0.0379125	0.00523812	-0.180161	-0.0315437	0.899558	0.835136	0.968949	0.851059	0.830836	TRUE	0.0492486
BCAC_iCOGS	N-acetylarginine levels	Inverse variance weighted	69	-0.0187594	0.00595194	0.00162259	-0.0304252	-0.00709361	0.981415	0.970033	0.992931	0.830668	0.00980612	TRUE	0.0215086
BCAC_iCOGS	N-acetylasparagine levels	Inverse variance weighted	75	-0.0182888	0.00565944	0.00123117	-0.0293813	-0.00719631	0.981877	0.971046	0.99283	0.782019	0.0142474	TRUE	0.0181645
BCAC_iCOGS	N-acetylcarnosine levels	Inverse variance weighted	30	-0.0243281	0.019777	0.218654	-0.0630911	0.014435	0.975965	0.938858	1.01454	NA	NA	NA	0.56177
BCAC_iCOGS	N-acetylcitrulline levels	Inverse variance weighted	68	-0.0197625	0.00608127	0.00115515	-0.0316818	-0.00784319	0.980432	0.968815	0.992187	0.945555	0.0208423	TRUE	0.017584
BCAC_iCOGS	N-acetylglucosamine_n-acetylgalactosamine levels	Inverse variance weighted	7	-0.0245888	0.0259188	0.342779	-0.0753896	0.0262119	0.975711	0.927382	1.02656	NA	NA	NA	0.690599
BCAC_iCOGS	N-acetylglucosaminylasparagine levels	Inverse variance weighted	19	0.0137551	0.0188133	0.464695	-0.0231189	0.0506291	1.01385	0.977146	1.05193	NA	NA	NA	0.785966
BCAC_iCOGS	N-acetylglutamate levels	Inverse variance weighted	4	-0.137938	0.0937239	0.141088	-0.321637	0.0457604	0.871152	0.724961	1.04682	NA	NA	NA	0.455566
BCAC_iCOGS	N-acetylglycine levels	Inverse variance weighted	16	0.039309	0.0221649	0.0761489	-0.00413416	0.0827522	1.04009	0.995874	1.08627	NA	NA	NA	0.304278
BCAC_iCOGS	N-acetylhistidine levels	Inverse variance weighted	33	-0.00516768	0.0140896	0.713788	-0.0327832	0.0224479	0.994846	0.967748	1.0227	NA	NA	NA	0.888723
BCAC_iCOGS	N-acetylkynurenine (2) levels	Inverse variance weighted	37	-0.0337323	0.0105812	0.00143286	-0.0544714	-0.0129932	0.96683	0.946986	0.987091	0.626615	0.0886467	TRUE	0.0199147
BCAC_iCOGS	N-acetylleucine levels	Inverse variance weighted	37	-0.0338391	0.0107453	0.00163726	-0.0549	-0.0127782	0.966727	0.94658	0.987303	0.581717	0.0569417	TRUE	0.0215086
BCAC_iCOGS	N-acetylmethionine levels	Wald ratio	rs148804382	-0.135442	0.151131	0.37015	-0.431658	0.160774	0.87333	0.649431	1.17442	NA	NA	NA	0.71045
BCAC_iCOGS	N-acetylneuraminate levels	Inverse variance weighted	3	-0.0362716	0.0639239	0.57043	-0.161562	0.0890193	0.964378	0.850813	1.0931	NA	NA	NA	0.82667
BCAC_iCOGS	N-acetylneuraminate to N-acetylglucosamine to N-acetylgalactosamine ratio	Inverse variance weighted	9	0.0217474	0.0248673	0.381825	-0.0269926	0.0704874	1.02199	0.973368	1.07303	NA	NA	NA	0.72223
BCAC_iCOGS	N-acetylphenylalanine levels	Inverse variance weighted	53	-0.0283704	0.00924431	0.00214809	-0.0464892	-0.0102515	0.972028	0.954575	0.989801	0.789956	0.0454549	TRUE	0.0254323
BCAC_iCOGS	N-acetylproline levels	Wald ratio	rs2518814	0.0999977	0.133157	0.452665	-0.160989	0.360984	1.10517	0.851301	1.43474	NA	NA	NA	0.777968
BCAC_iCOGS	N-acetylputrescine levels	Inverse variance weighted	23	0.0222337	0.0143783	0.122024	-0.00594782	0.0504152	1.02248	0.99407	1.05171	NA	NA	NA	0.42227
BCAC_iCOGS	N-acetylputrescine to (N(1) + N(8))-acetylspermidine ratio	Inverse variance weighted	25	0.0097789	0.0147144	0.506318	-0.0190613	0.0386191	1.00983	0.981119	1.03937	NA	NA	NA	0.802924
BCAC_iCOGS	N-acetylserine levels	Inverse variance weighted	2	0.178808	0.251242	0.476652	-0.313626	0.671242	1.19579	0.730792	1.95667	NA	NA	NA	0.790373
BCAC_iCOGS	N-acetyltaurine levels	Inverse variance weighted	7	0.0448366	0.0348983	0.198869	-0.023564	0.113237	1.04586	0.976711	1.1199	NA	NA	NA	0.531616
BCAC_iCOGS	N-acetylthreonine levels	Wald ratio	rs1047891	-0.229427	0.145435	0.114676	-0.51448	0.0556262	0.794989	0.597811	1.0572	NA	NA	NA	0.405809
BCAC_iCOGS	N-acetyltyrosine levels	Inverse variance weighted	54	-0.0259096	0.00781911	0.000920929	-0.0412351	-0.0105842	0.974423	0.959604	0.989472	0.735833	0.13952	TRUE	0.0157709
BCAC_iCOGS	N-acetylvaline levels	Wald ratio	rs74289058	-0.0356672	0.113422	0.753168	-0.257974	0.18664	0.964961	0.772615	1.20519	NA	NA	NA	0.902349
BCAC_iCOGS	N-alpha-acetylornithine levels	Inverse variance weighted	4	-0.141771	0.0419606	0.000728389	-0.224013	-0.0595279	0.86782	0.799304	0.942209	0.822076	0.964308	TRUE	0.0139515
BCAC_iCOGS	N-delta-acetylornithine levels	Inverse variance weighted	69	0.02207	0.00647709	0.000655848	0.00937495	0.0347651	1.02232	1.00942	1.03538	0.972169	0.0469427	TRUE	0.0138081
BCAC_iCOGS	N-formylanthranilic acid levels	Inverse variance weighted	18	0.00228529	0.0183556	0.900919	-0.0336917	0.0382622	1.00229	0.96687	1.039	NA	NA	NA	0.96695
BCAC_iCOGS	N-formylmethionine levels	Inverse variance weighted	6	0.0523664	0.03737	0.161125	-0.0208787	0.125612	1.05376	0.979338	1.13384	NA	NA	NA	0.47973
BCAC_iCOGS	N-methyl-2-pyridone-5-carboxamide levels	Inverse variance weighted	2	0.00800247	0.0863237	0.926139	-0.161192	0.177197	1.00803	0.851129	1.19387	NA	NA	NA	0.974662
BCAC_iCOGS	N-methylproline levels	Wald ratio	rs116522067	0.396901	0.136084	0.00353891	0.130176	0.663627	1.48721	1.13903	1.94182	NA	NA	TRUE	0.0368408
BCAC_iCOGS	N-oleoylserine levels	Inverse variance weighted	2	-0.0976788	0.0482874	0.0430871	-0.192322	-0.00303557	0.90694	0.825041	0.996969	0.926611	NA	TRUE	0.216338
BCAC_iCOGS	N-oleoyltaurine levels	Inverse variance weighted	6	-0.0530173	0.0364291	0.145571	-0.124418	0.0183837	0.948364	0.88301	1.01855	NA	NA	NA	0.460267
BCAC_iCOGS	N-palmitoyl-heptadecasphingosine (d17:1_16:0) levels	Inverse variance weighted	6	-0.0342979	0.0329868	0.298457	-0.098952	0.0303562	0.966284	0.905786	1.03082	NA	NA	NA	0.671879
BCAC_iCOGS	N-palmitoyl-sphinganine (d18:0_16:0) levels	Wald ratio	rs964184	0.0140481	0.11695	0.904388	-0.215174	0.24327	1.01415	0.806401	1.27541	NA	NA	NA	0.96695
BCAC_iCOGS	N-palmitoyl-sphingosine (d18:1 to 16:0) to N-palmitoyl-sphinganine (d18:0 to 16:0) ratio	Inverse variance weighted	7	-0.00407987	0.0407218	0.920195	-0.0838947	0.0757349	0.995928	0.919528	1.07868	NA	NA	NA	0.972911
BCAC_iCOGS	N-palmitoyl-sphingosine (d18:1 to 16:0) to N-stearoyl-sphingosine (d18:1 to 18:0) ratio	Inverse variance weighted	7	0.00194711	0.0357741	0.956594	-0.0681702	0.0720644	1.00195	0.934102	1.07472	NA	NA	NA	0.990472
BCAC_iCOGS	N-palmitoylglycine levels	Inverse variance weighted	27	-0.0411937	0.0216105	0.0566259	-0.0835502	0.00116291	0.959643	0.919845	1.00116	NA	NA	NA	0.249102
BCAC_iCOGS	N-stearoyl-sphingadienine (d18:2_18:0) levels	Inverse variance weighted	2	0.0557375	0.0822699	0.498091	-0.105511	0.216987	1.05732	0.899864	1.24233	NA	NA	NA	0.797422
BCAC_iCOGS	N-stearoyl-sphinganine (d18:0_18:0) levels	Wald ratio	rs364585	-0.140328	0.113117	0.214768	-0.362036	0.0813804	0.869073	0.696257	1.08478	NA	NA	NA	0.56177
BCAC_iCOGS	N-stearoyl-sphingosine (d18:1 to 18:0) to N-palmitoyl-sphinganine (d18:0 to 16:0) ratio	Inverse variance weighted	7	0.0202407	0.0358797	0.572667	-0.0500835	0.090565	1.02045	0.95115	1.09479	NA	NA	NA	0.82667
BCAC_iCOGS	N-stearoyl-sphingosine (d18:1_18:0) levels	Inverse variance weighted	12	0.0709016	0.0385606	0.0659584	-0.00467717	0.14648	1.07348	0.995334	1.15775	NA	NA	NA	0.273827
BCAC_iCOGS	N-succinyl-phenylalanine levels	Inverse variance weighted	30	0.023968	0.0168194	0.154151	-0.00899804	0.0569341	1.02426	0.991042	1.05859	NA	NA	NA	0.469305
BCAC_iCOGS	N,N-dimethylalanine levels	Inverse variance weighted	10	-0.0690195	0.0356398	0.0527959	-0.138874	0.00083446	0.933308	0.870338	1.00083	NA	NA	NA	0.244596
BCAC_iCOGS	N,N,N-trimethyl-5-aminovalerate levels	Inverse variance weighted	25	-0.0316485	0.0243545	0.193775	-0.0793834	0.0160864	0.968847	0.923686	1.01622	NA	NA	NA	0.526857
BCAC_iCOGS	N,n,n-trimethyl-alanylproline betaine (tmap) levels	Wald ratio	rs117050209	0.40964	0.227378	0.0716117	-0.0360216	0.855301	1.50627	0.964619	2.35208	NA	NA	NA	0.289771
BCAC_iCOGS	N1-methyladenosine levels	Inverse variance weighted	2	0.030847	0.086074	0.72006	-0.137858	0.199552	1.03133	0.871222	1.22086	NA	NA	NA	0.888723
BCAC_iCOGS	N1-methylinosine levels	Wald ratio	rs1171615	0.0856816	0.139366	0.538689	-0.187475	0.358838	1.08946	0.82905	1.43167	NA	NA	NA	0.819969
BCAC_iCOGS	N2-acetyl,N6-methyllysine levels	Inverse variance weighted	115	-0.00276407	0.00557233	0.61987	-0.0136858	0.00815769	0.99724	0.986407	1.00819	NA	NA	NA	0.84801
BCAC_iCOGS	N2-acetyl,N6,N6-dimethyllysine levels	Inverse variance weighted	105	0.0030248	0.00638372	0.635621	-0.0094873	0.0155369	1.00303	0.990558	1.01566	NA	NA	NA	0.858536
BCAC_iCOGS	N2,n2-dimethylguanosine levels	Inverse variance weighted	2	0.223213	0.116899	0.0562045	-0.0059097	0.452336	1.25009	0.994108	1.57198	NA	NA	NA	0.249003
BCAC_iCOGS	N2,N5-diacetylornithine levels	Inverse variance weighted	23	-0.0505563	0.0155541	0.00115261	-0.0810423	-0.0200703	0.9507	0.922155	0.98013	0.597994	0.0274612	TRUE	0.017584
BCAC_iCOGS	N4-acetylcytidine levels	Inverse variance weighted	16	-0.0899241	0.0260096	0.000545534	-0.140903	-0.0389453	0.914001	0.868574	0.961803	0.53352	0.364275	TRUE	0.0118902
BCAC_iCOGS	N6-acetyllysine levels	Inverse variance weighted	12	-0.0162005	0.0244877	0.508243	-0.0641963	0.0317954	0.98393	0.937821	1.03231	NA	NA	NA	0.802924
BCAC_iCOGS	N6-carbamoylthreonyladenosine levels	Inverse variance weighted	14	-0.247636	0.0345139	7.2328e-13	-0.315283	-0.179989	0.780644	0.729582	0.83528	0.923415	0.19046	TRUE	1.73406e-10
BCAC_iCOGS	N6-methyllysine levels	Inverse variance weighted	80	0.0265029	0.00778418	0.000662329	0.0112459	0.0417599	1.02686	1.01131	1.04264	0.979017	0.183216	TRUE	0.0138081
BCAC_iCOGS	N6,N6-dimethyllysine levels	Inverse variance weighted	74	0.0223588	0.00764224	0.00343695	0.00738002	0.0373376	1.02261	1.00741	1.03804	0.949458	0.425917	TRUE	0.0363704
BCAC_iCOGS	N6,n6,n6-trimethyllysine levels	Inverse variance weighted	9	0.0515733	0.0367242	0.160218	-0.0204062	0.123553	1.05293	0.979801	1.13151	NA	NA	NA	0.478656
BCAC_iCOGS	Nervonoylcarnitine (C24:1) levels	Inverse variance weighted	11	-0.100493	0.0378121	0.00786794	-0.174604	-0.0263809	0.904392	0.839789	0.973964	0.00291525	0.0689101	TRUE	0.0661873
BCAC_iCOGS	Nisinate (24:6n3) levels	Inverse variance weighted	2	0.0689175	0.0694985	0.321374	-0.0672997	0.205135	1.07135	0.934915	1.22769	NA	NA	NA	0.687397
BCAC_iCOGS	Nonanoylcarnitine (C9) levels	Inverse variance weighted	29	0.0480372	0.0165248	0.00364951	0.0156485	0.0804259	1.04921	1.01577	1.08375	0.0207382	0.770572	TRUE	0.0368408
BCAC_iCOGS	O-sulfo-l-tyrosine levels	Inverse variance weighted	3	-0.231541	0.1346	0.0853941	-0.495358	0.0322757	0.79331	0.609353	1.0328	NA	NA	NA	0.331803
BCAC_iCOGS	Octadecadienedioate (C18:2-DC) levels	Inverse variance weighted	7	0.0487477	0.0217156	0.0247797	0.00618505	0.0913103	1.04996	1.0062	1.09561	0.191852	0.573909	TRUE	0.148523
BCAC_iCOGS	Octadecanedioate levels	Inverse variance weighted	8	0.0884192	0.0341182	0.00955433	0.0215475	0.155291	1.09245	1.02178	1.168	0.717134	0.932128	TRUE	0.076355
BCAC_iCOGS	Octadecanedioylcarnitine (C18-DC) levels	Inverse variance weighted	14	0.0212338	0.0169313	0.2098	-0.0119516	0.0544192	1.02146	0.98812	1.05593	NA	NA	NA	0.554266
BCAC_iCOGS	Octadecenedioate (C18:1-DC) levels	Inverse variance weighted	4	0.0491674	0.0219757	0.0252634	0.006095	0.0922398	1.0504	1.00611	1.09663	0.451468	0.689475	TRUE	0.148774
BCAC_iCOGS	Octadecenedioylcarnitine (C18:1-DC) levels	Inverse variance weighted	6	0.0382069	0.0182326	0.0361241	0.00247103	0.0739429	1.03895	1.00247	1.07675	0.619429	0.347473	TRUE	0.190346
BCAC_iCOGS	Octanoylcarnitine (c8) levels	Inverse variance weighted	33	0.0460741	0.0166184	0.00556323	0.013502	0.0786463	1.04715	1.01359	1.08182	0.00554456	0.68997	TRUE	0.0517974
BCAC_iCOGS	Oleoyl-linoleoyl-glycerol (18:1 to 18:2) [2] to linoleoyl-arachidonoyl-glycerol (18:2 to 20:4) [1] ratio	Inverse variance weighted	22	-0.00237778	0.0156801	0.879469	-0.0331108	0.0283553	0.997625	0.967431	1.02876	NA	NA	NA	0.959511
BCAC_iCOGS	Oleoyl-linoleoyl-glycerol (18:1 to 18:2) [2] to linoleoyl-arachidonoyl-glycerol (18:2 to 20:4) [2] ratio	Inverse variance weighted	16	0.000735234	0.0198723	0.970487	-0.0382144	0.0396849	1.00074	0.962507	1.04048	NA	NA	NA	0.99135
BCAC_iCOGS	Oleoyl-linoleoyl-glycerol (18:1_18:2) [2] levels	Inverse variance weighted	13	0.0154565	0.0287091	0.590312	-0.0408133	0.0717262	1.01558	0.960008	1.07436	NA	NA	NA	0.834969
BCAC_iCOGS	Oleoyl ethanolamide levels	Inverse variance weighted	9	-0.142606	0.0373859	0.000136494	-0.215882	-0.0693297	0.867096	0.80583	0.933019	0.185643	0.241478	TRUE	0.00409056
BCAC_iCOGS	Oleoylcarnitine levels	Inverse variance weighted	5	-0.139056	0.0722256	0.0541921	-0.280618	0.00250638	0.870179	0.755317	1.00251	NA	NA	NA	0.246844
BCAC_iCOGS	Ornithine levels	Wald ratio	rs17788484	0.0119588	0.107587	0.911494	-0.198912	0.22283	1.01203	0.819622	1.24961	NA	NA	NA	0.96695
BCAC_iCOGS	Ornithine to glutamate ratio	Inverse variance weighted	3	0.146743	0.105995	0.166225	-0.0610068	0.354492	1.15806	0.940817	1.42546	NA	NA	NA	0.484529
BCAC_iCOGS	Ornithine to phosphate ratio	Inverse variance weighted	2	-0.0535548	0.10143	0.597502	-0.252358	0.145248	0.947854	0.776966	1.15633	NA	NA	NA	0.840182
BCAC_iCOGS	Orotate levels	Inverse variance weighted	45	-0.0184681	0.0128343	0.150163	-0.0436234	0.00668726	0.981701	0.957314	1.00671	NA	NA	NA	0.46738
BCAC_iCOGS	Orotidine levels	Inverse variance weighted	18	0.00194038	0.0103907	0.851863	-0.0184254	0.0223061	1.00194	0.981743	1.02256	NA	NA	NA	0.944435
BCAC_iCOGS	Oxalate (ethanedioate) levels	Inverse variance weighted	4	0.0722856	0.0592677	0.222599	-0.0438791	0.18845	1.07496	0.95707	1.20738	NA	NA	NA	0.56177
BCAC_iCOGS	P-cresol glucuronide levels	Inverse variance weighted	3	0.109532	0.0624721	0.079551	-0.0129132	0.231978	1.11576	0.98717	1.26109	NA	NA	NA	0.313948
BCAC_iCOGS	Palmitoleate (16:1n7) levels	Wald ratio	rs603424	-0.104844	0.107671	0.330185	-0.315879	0.106192	0.900465	0.729147	1.11203	NA	NA	NA	0.687926
BCAC_iCOGS	Palmitoleoylcarnitine (C16:1) levels	Inverse variance weighted	3	-0.337553	0.130831	0.00987828	-0.593982	-0.0811234	0.713515	0.552125	0.92208	0.0186055	0.219982	TRUE	0.0778659
BCAC_iCOGS	Palmitoyl-sphingosine-phosphoethanolamine (d18:1_16:0) levels	Inverse variance weighted	3	0.300898	0.126284	0.0171861	0.0533808	0.548416	1.35107	1.05483	1.73051	0.150291	0.302705	TRUE	0.118572
BCAC_iCOGS	Palmitoyl dihydrosphingomyelin (d18:0_16:0) levels	Inverse variance weighted	6	-0.0320428	0.045835	0.484496	-0.121879	0.0577937	0.968465	0.885255	1.0595	NA	NA	NA	0.790896
BCAC_iCOGS	Palmitoyl sphingomyelin (d18:1_16:0) levels	Inverse variance weighted	4	-0.027863	0.0645648	0.666068	-0.15441	0.098684	0.972522	0.856921	1.10372	NA	NA	NA	0.868052
BCAC_iCOGS	Palmitoylcarnitine levels (Metabolon platform)	Inverse variance weighted	3	-0.037637	0.160245	0.814309	-0.351718	0.276444	0.963062	0.703479	1.31843	NA	NA	NA	0.923914
BCAC_iCOGS	Pantothenate levels	Wald ratio	rs116400211	0.0688643	0.133779	0.606719	-0.193342	0.331071	1.07129	0.8242	1.39246	NA	NA	NA	0.846365
BCAC_iCOGS	Paraxanthine levels in elite athletes	Wald ratio	rs56113850	0.0969451	0.1244	0.435802	-0.146879	0.340769	1.1018	0.863399	1.40603	NA	NA	NA	0.765003
BCAC_iCOGS	Paraxanthine to 5-acetylamino-6-formylamino-3-methyluracil ratio	Inverse variance weighted	67	-0.0052624	0.00769291	0.493938	-0.0203405	0.0098157	0.994751	0.979865	1.00986	NA	NA	NA	0.796311
BCAC_iCOGS	Paraxanthine to linoleate (18:2n6) ratio	Wald ratio	rs56113850	0.0969381	0.124391	0.435802	-0.146868	0.340744	1.10179	0.863408	1.40599	NA	NA	NA	0.765003
BCAC_iCOGS	Pentose acid levels	Wald ratio	rs146924265	-0.0787754	0.136005	0.562449	-0.345346	0.187795	0.924247	0.707975	1.20659	NA	NA	NA	0.822367
BCAC_iCOGS	Perfluorooctanesulfonate (PFOS) levels	Wald ratio	rs141471965	-0.251389	0.117457	0.0323336	-0.481605	-0.0211731	0.77772	0.617791	0.979049	NA	NA	TRUE	0.179236
BCAC_iCOGS	Phenylacetate levels	Wald ratio	rs59532339	-0.0843445	0.0989883	0.394178	-0.278362	0.109673	0.919115	0.757023	1.11591	NA	NA	NA	0.741209
BCAC_iCOGS	Phenylacetylcarnitine levels	Inverse variance weighted	2	0.0247053	0.0579768	0.670018	-0.0889292	0.13834	1.02501	0.91491	1.14837	NA	NA	NA	0.868307
BCAC_iCOGS	Phenylacetylglutamate levels	Inverse variance weighted	3	-0.0186615	0.0460859	0.685531	-0.10899	0.071667	0.981512	0.896739	1.0743	NA	NA	NA	0.876545
BCAC_iCOGS	Phenylalanine to tyrosine ratio	Inverse variance weighted	13	-0.0983199	0.0439503	0.0252819	-0.184463	-0.0121772	0.906359	0.831551	0.987897	0.000808608	0.425998	TRUE	0.148774
BCAC_iCOGS	Phenyllactate (PLA) levels in elite athletes	Inverse variance weighted	5	0.0793429	0.0272814	0.00363377	0.0258714	0.132814	1.08258	1.02621	1.14204	0.69494	0.390351	TRUE	0.0368408
BCAC_iCOGS	Phenylpyruvate levels	Inverse variance weighted	3	0.0527861	0.0600717	0.379554	-0.0649545	0.170527	1.0542	0.93711	1.18593	NA	NA	NA	0.720777
BCAC_iCOGS	Phenylpyruvate to citrate ratio	Inverse variance weighted	3	0.0667144	0.0715118	0.350864	-0.0734488	0.206878	1.06899	0.929184	1.22983	NA	NA	NA	0.69954
BCAC_iCOGS	Phosphate levels (UKB data field 30810)	Inverse variance weighted	2	-0.0418534	0.0841335	0.618862	-0.206755	0.123048	0.95901	0.813219	1.13094	NA	NA	NA	0.84801
BCAC_iCOGS	Phosphate to 2'-deoxyuridine ratio	Inverse variance weighted	7	0.0128796	0.0308137	0.675959	-0.0475152	0.0732744	1.01296	0.953596	1.07603	NA	NA	NA	0.872469
BCAC_iCOGS	Phosphate to 5-oxoproline ratio	Inverse variance weighted	12	-0.0180603	0.019907	0.364284	-0.0570781	0.0209575	0.982102	0.94452	1.02118	NA	NA	NA	0.71045
BCAC_iCOGS	phosphate to asparagine ratio	Inverse variance weighted	16	0.0309157	0.0296793	0.29757	-0.0272558	0.0890872	1.0314	0.973112	1.09318	NA	NA	NA	0.671458
BCAC_iCOGS	Phosphate to citrate ratio	Inverse variance weighted	4	-0.0662581	0.0654814	0.311604	-0.194602	0.0620855	0.935889	0.823163	1.06405	NA	NA	NA	0.682257
BCAC_iCOGS	Phosphate to glutamate ratio	Wald ratio	rs62354638	-0.0612042	0.140303	0.662671	-0.336198	0.21379	0.940631	0.714482	1.23836	NA	NA	NA	0.868052
BCAC_iCOGS	Phosphate to glutamine ratio	Wald ratio	rs12132412	0.0687385	0.123136	0.576686	-0.172608	0.310085	1.07116	0.841467	1.36354	NA	NA	NA	0.82667
BCAC_iCOGS	Phosphate to linoleoyl-arachidonoyl-glycerol (18:2 to 20:4) [1] ratio	Inverse variance weighted	10	0.0566721	0.0287166	0.0484391	0.000387557	0.112957	1.05831	1.00039	1.11958	0.25465	0.413719	TRUE	0.232265
BCAC_iCOGS	Phosphate to linoleoyl-arachidonoyl-glycerol (18:2 to 20:4) [2] ratio	Inverse variance weighted	11	0.0397987	0.0244748	0.103926	-0.00817185	0.0877693	1.0406	0.991861	1.09174	NA	NA	NA	0.384807
BCAC_iCOGS	Phosphate to mannose ratio	Inverse variance weighted	10	0.000549176	0.0251869	0.982604	-0.0488171	0.0499155	1.00055	0.952355	1.05118	NA	NA	NA	0.99135
BCAC_iCOGS	Phosphate to N-acetylneuraminate ratio	Inverse variance weighted	2	0.0472793	0.0842502	0.574677	-0.117851	0.21241	1.04841	0.888828	1.23665	NA	NA	NA	0.82667
BCAC_iCOGS	Phosphate to oleoyl-linoleoyl-glycerol (18:1 to 18:2) [2] ratio	Inverse variance weighted	11	-0.00820942	0.0312209	0.792592	-0.0694024	0.0529836	0.991824	0.932951	1.05441	NA	NA	NA	0.915778
BCAC_iCOGS	Phosphate to phosphoethanolamine ratio	Wald ratio	rs1256335	0.0858032	0.131324	0.513519	-0.171593	0.343199	1.08959	0.842322	1.40945	NA	NA	NA	0.804681
BCAC_iCOGS	Phosphate to proline ratio	Inverse variance weighted	8	-0.0049448	0.0362508	0.891501	-0.0759965	0.0661068	0.995067	0.926819	1.06834	NA	NA	NA	0.96695
BCAC_iCOGS	Phosphate to serine ratio	Inverse variance weighted	10	-0.0326995	0.0337826	0.333075	-0.0989134	0.0335144	0.967829	0.905821	1.03408	NA	NA	NA	0.687926
BCAC_iCOGS	Phosphate to sulfate ratio	Wald ratio	rs116402366	0.021515	0.12559	0.863979	-0.224641	0.267671	1.02175	0.798803	1.30692	NA	NA	NA	0.949091
BCAC_iCOGS	Phosphate to threonine ratio	Inverse variance weighted	4	0.0719663	0.0605676	0.234756	-0.0467462	0.190679	1.07462	0.95433	1.21007	NA	NA	NA	0.581733
BCAC_iCOGS	Phosphate to tryptophan ratio	Inverse variance weighted	4	-0.281041	0.110367	0.010883	-0.497359	-0.0647225	0.754997	0.608134	0.937328	0.0500214	0.114648	TRUE	0.0809262
BCAC_iCOGS	Phosphate to tyrosine ratio	Inverse variance weighted	7	-0.21122	0.0399772	1.26739e-07	-0.289575	-0.132864	0.809596	0.748582	0.875584	0.278093	0.0563195	TRUE	1.06038e-05
BCAC_iCOGS	Phosphate to urate ratio	Inverse variance weighted	12	-0.124526	0.0336106	0.000211422	-0.190403	-0.0586493	0.882915	0.826626	0.943037	0.217246	0.0223077	TRUE	0.00596333
BCAC_iCOGS	Phosphate to uridine ratio	Inverse variance weighted	2	-0.0262958	0.0726699	0.717462	-0.168729	0.116137	0.974047	0.844738	1.12315	NA	NA	NA	0.888723
BCAC_iCOGS	Phosphocholine levels	Inverse variance weighted	8	-0.0189573	0.0538808	0.724959	-0.124564	0.086649	0.981221	0.882882	1.09051	NA	NA	NA	0.891002
BCAC_iCOGS	Phosphoethanolamine levels	Inverse variance weighted	4	-0.00144197	0.0679941	0.98308	-0.13471	0.131826	0.998559	0.873969	1.14091	NA	NA	NA	0.99135
BCAC_iCOGS	Phosphoethanolamine to choline ratio	Wald ratio	rs56702468	-0.260345	0.125393	0.0378732	-0.506116	-0.0145737	0.770786	0.602833	0.985532	NA	NA	TRUE	0.195271
BCAC_iCOGS	Picolinate levels	Inverse variance weighted	5	-0.0859636	0.0440835	0.0511744	-0.172367	0.000440185	0.917628	0.84167	1.00044	NA	NA	NA	0.24057
BCAC_iCOGS	Picolinoylglycine levels	Inverse variance weighted	2	-0.0456033	0.217841	0.834181	-0.472572	0.381365	0.955421	0.623397	1.46428	NA	NA	NA	0.93235
BCAC_iCOGS	Pimeloylcarnitine_3-methyladipoylcarnitine (C7-DC) levels	Inverse variance weighted	13	0.0119804	0.0263886	0.64983	-0.0397413	0.0637021	1.01205	0.961038	1.06577	NA	NA	NA	0.868052
BCAC_iCOGS	Pipecolate levels	Wald ratio	rs10182251	0.135222	0.121672	0.266411	-0.103255	0.3737	1.14479	0.901897	1.4531	NA	NA	NA	0.627735
BCAC_iCOGS	Plasma free asparagine levels	Inverse variance weighted	20	-0.0622518	0.0200052	0.00185966	-0.101462	-0.0230415	0.939646	0.903515	0.977222	0.352544	0.93023	TRUE	0.0234659
BCAC_iCOGS	Plasma free proline levels	Inverse variance weighted	10	0.00376596	0.0292851	0.897677	-0.0536328	0.0611647	1.00377	0.94778	1.06307	NA	NA	NA	0.96695
BCAC_iCOGS	Pregnanediol-3-glucuronide levels	Inverse variance weighted	9	0.0280646	0.0240605	0.243444	-0.0190939	0.0752231	1.02846	0.981087	1.07812	NA	NA	NA	0.592545
BCAC_iCOGS	Pregnenediol disulfate (C21H34O8S2) levels	Inverse variance weighted	20	-0.00424743	0.018926	0.822428	-0.0413424	0.0328475	0.995762	0.959501	1.03339	NA	NA	NA	0.926351
BCAC_iCOGS	Pregnenediol sulfate (C21H34O5S) levels	Inverse variance weighted	14	-0.00580577	0.035966	0.87176	-0.0762991	0.0646876	0.994211	0.926539	1.06683	NA	NA	NA	0.954358
BCAC_iCOGS	Pregnenetriol disulfate levels	Inverse variance weighted	13	-0.00732199	0.0201803	0.716733	-0.0468754	0.0322314	0.992705	0.954206	1.03276	NA	NA	NA	0.888723
BCAC_iCOGS	Pregnenetriol sulfate levels	Inverse variance weighted	9	0.00754234	0.0366759	0.837065	-0.0643423	0.079427	1.00757	0.937684	1.08267	NA	NA	NA	0.93235
BCAC_iCOGS	Pregnenolone sulfate levels	Inverse variance weighted	7	0.0567761	0.0482926	0.239727	-0.0378773	0.15143	1.05842	0.962831	1.1635	NA	NA	NA	0.586474
BCAC_iCOGS	Pro-hydroxy-pro levels	Wald ratio	rs62316592	-0.112333	0.159855	0.482232	-0.425649	0.200983	0.893747	0.653346	1.2226	NA	NA	NA	0.790753
BCAC_iCOGS	Proline to glutamate ratio	Inverse variance weighted	2	0.0256455	0.0772526	0.739913	-0.12577	0.177061	1.02598	0.881818	1.1937	NA	NA	NA	0.899336
BCAC_iCOGS	Proline to trans-4-hydroxyproline ratio	Inverse variance weighted	4	0.0476507	0.0600306	0.427328	-0.0700094	0.165311	1.0488	0.932385	1.17976	NA	NA	NA	0.765003
BCAC_iCOGS	Prolylglycine levels	Wald ratio	rs164749	0.168702	0.102565	0.100003	-0.0323242	0.369729	1.18377	0.968193	1.44734	NA	NA	NA	0.376089
BCAC_iCOGS	Propionylcarnitine (c3) levels	Inverse variance weighted	16	0.043173	0.0385656	0.26294	-0.0324156	0.118762	1.04412	0.968104	1.1261	NA	NA	NA	0.624158
BCAC_iCOGS	Propionylglycine levels	Inverse variance weighted	15	0.0476956	0.0196279	0.015099	0.009225	0.0861662	1.04885	1.00927	1.08999	0.49366	0.420199	TRUE	0.10647
BCAC_iCOGS	Pseudouridine levels	Inverse variance weighted	2	0.219715	0.14891	0.140081	-0.0721486	0.511578	1.24572	0.930393	1.66792	NA	NA	NA	0.454662
BCAC_iCOGS	Pyruvate to 3-methyl-2-oxobutyrate ratio	Wald ratio	rs1440581	-0.179029	0.0905961	0.0481406	-0.356597	-0.00146091	0.836081	0.700054	0.99854	NA	NA	TRUE	0.231994
BCAC_iCOGS	Pyruvate to N-acetylneuraminate ratio	Inverse variance weighted	2	0.0773523	0.0867616	0.372634	-0.0927005	0.247405	1.08042	0.911466	1.2807	NA	NA	NA	0.71045
BCAC_iCOGS	Quinolinate levels	Inverse variance weighted	6	-0.01981	0.0675414	0.769291	-0.152191	0.112571	0.980385	0.858824	1.11915	NA	NA	NA	0.906327
BCAC_iCOGS	Retinol (Vitamin A) levels	Wald ratio	rs1883711	-0.0115709	0.126146	0.926916	-0.258817	0.235676	0.988496	0.771964	1.26576	NA	NA	NA	0.974662
BCAC_iCOGS	Retinol (Vitamin A) to linoleoyl-arachidonoyl-glycerol (18:2 to 20:4) [1] ratio	Inverse variance weighted	11	0.0549187	0.0243098	0.023876	0.00727153	0.102566	1.05645	1.0073	1.10801	0.558778	0.535756	TRUE	0.144474
BCAC_iCOGS	Retinol (Vitamin A) to linoleoyl-arachidonoyl-glycerol (18:2 to 20:4) [2] ratio	Inverse variance weighted	11	0.0438489	0.023685	0.0641213	-0.00257371	0.0902714	1.04482	0.99743	1.09447	NA	NA	NA	0.26737
BCAC_iCOGS	Retinol (Vitamin A) to oleoyl-linoleoyl-glycerol (18:1 to 18:2) [2] ratio	Inverse variance weighted	10	-0.0202479	0.0334806	0.545335	-0.0858699	0.0453741	0.979956	0.917714	1.04642	NA	NA	NA	0.819969
BCAC_iCOGS	Ribitol levels	Inverse variance weighted	15	-0.0267769	0.0138665	0.0534767	-0.0539551	0.000401413	0.973578	0.947475	1.0004	NA	NA	NA	0.245988
BCAC_iCOGS	S-1-pyrroline-5-carboxylate levels	Inverse variance weighted	12	0.0297628	0.0310598	0.337941	-0.0311144	0.0906401	1.03021	0.969365	1.09487	NA	NA	NA	0.689458
BCAC_iCOGS	S-adenosylhomocysteine (SAH) levels	Inverse variance weighted	4	0.0379452	0.0389882	0.330429	-0.0384716	0.114362	1.03867	0.962259	1.12116	NA	NA	NA	0.687926
BCAC_iCOGS	S-adenosylhomocysteine (SAH) to 5-methyluridine (ribothymidine) ratio	Inverse variance weighted	10	0.0335699	0.024991	0.179181	-0.0154124	0.0825523	1.03414	0.984706	1.08606	NA	NA	NA	0.502441
BCAC_iCOGS	S-adenosylhomocysteine (SAH) to leucine ratio	Inverse variance weighted	5	0.0227415	0.0325624	0.484929	-0.0410808	0.0865637	1.023	0.959752	1.09042	NA	NA	NA	0.790896
BCAC_iCOGS	S-allylcysteine levels	Wald ratio	rs2236872	0.135128	0.0957805	0.158302	-0.052602	0.322857	1.14468	0.948758	1.38107	NA	NA	NA	0.475079
BCAC_iCOGS	S-carboxyethylcysteine levels	Wald ratio	rs7519001	0.0749222	0.13347	0.574565	-0.186679	0.336524	1.0778	0.82971	1.40007	NA	NA	NA	0.82667
BCAC_iCOGS	S-methylcysteine levels	Inverse variance weighted	2	0.0607229	0.0419055	0.147326	-0.0214119	0.142858	1.0626	0.978816	1.15357	NA	NA	NA	0.461996
BCAC_iCOGS	Sebacate (C10-DC) levels	Inverse variance weighted	5	-0.113841	0.0841899	0.176312	-0.278854	0.0511708	0.892399	0.756651	1.0525	NA	NA	NA	0.502441
BCAC_iCOGS	Serine levels	Inverse variance weighted	15	0.0715084	0.0236708	0.00251976	0.0251137	0.117903	1.07413	1.02543	1.12514	0.6012	0.368259	TRUE	0.0291138
BCAC_iCOGS	Serine to alpha-ketobutyrate ratio	Inverse variance weighted	4	0.0474801	0.0573273	0.407541	-0.0648814	0.159842	1.04863	0.937179	1.17333	NA	NA	NA	0.754064
BCAC_iCOGS	Serine to alpha-tocopherol ratio	Inverse variance weighted	4	0.142833	0.0511493	0.0052306	0.0425806	0.243086	1.15354	1.0435	1.27518	0.981095	0.916254	TRUE	0.0492486
BCAC_iCOGS	Serine to pyruvate ratio	Inverse variance weighted	5	0.0916852	0.0508779	0.0715353	-0.00803543	0.191406	1.09602	0.991997	1.21095	NA	NA	NA	0.289771
BCAC_iCOGS	Serine to threonine ratio	Inverse variance weighted	22	0.0660316	0.0180147	0.000246915	0.0307229	0.10134	1.06826	1.0312	1.10665	0.661767	0.645606	TRUE	0.00676547
BCAC_iCOGS	Spermidine levels	Wald ratio	rs3811444	-0.0740902	0.123376	0.548158	-0.315908	0.167727	0.928588	0.729127	1.18261	NA	NA	NA	0.819969
BCAC_iCOGS	Spermidine to (N(1) + N(8))-acetylspermidine ratio	Inverse variance weighted	6	-0.0521271	0.0467496	0.264838	-0.143756	0.0395021	0.949208	0.866099	1.04029	NA	NA	NA	0.625567
BCAC_iCOGS	Spermidine to carnitine ratio	Inverse variance weighted	2	-0.0649722	0.0702587	0.355092	-0.202679	0.0727348	0.937093	0.81654	1.07545	NA	NA	NA	0.705038
BCAC_iCOGS	Spermidine to choline ratio	Wald ratio	rs3811444	-0.0801981	0.133547	0.548158	-0.341951	0.181555	0.922933	0.710383	1.19908	NA	NA	NA	0.819969
BCAC_iCOGS	Spermidine to ergothioneine ratio	Inverse variance weighted	5	-0.229215	0.074866	0.00220103	-0.375953	-0.082478	0.795157	0.686635	0.920832	0.015602	0.0445735	TRUE	0.0257413
BCAC_iCOGS	Spermidine to histidine ratio	Wald ratio	rs3811444	-0.0769841	0.128195	0.548158	-0.328247	0.174279	0.925905	0.720185	1.19039	NA	NA	NA	0.819969
BCAC_iCOGS	Spermidine to N-acetylputrescine ratio	Inverse variance weighted	7	-0.0362498	0.0277623	0.191647	-0.0906638	0.0181642	0.964399	0.913325	1.01833	NA	NA	NA	0.525112
BCAC_iCOGS	Spermidine to ornithine ratio	Wald ratio	rs3811444	-0.0820558	0.136641	0.548158	-0.349872	0.18576	0.921221	0.704778	1.20413	NA	NA	NA	0.819969
BCAC_iCOGS	Spermidine to phosphate ratio	Wald ratio	rs3811444	-0.0810533	0.134971	0.548158	-0.345597	0.183491	0.922145	0.707797	1.2014	NA	NA	NA	0.819969
BCAC_iCOGS	Spermidine to pyruvate ratio	Wald ratio	rs3811444	-0.0788606	0.13132	0.548158	-0.336248	0.178527	0.924169	0.714446	1.19545	NA	NA	NA	0.819969
BCAC_iCOGS	Sphingadienine levels	Wald ratio	rs1354034	0.109183	0.0894164	0.222064	-0.0660735	0.284439	1.11537	0.936062	1.32902	NA	NA	NA	0.56177
BCAC_iCOGS	Sphinganine-1-phosphate levels	Wald ratio	rs12449930	0.0656709	0.133899	0.623815	-0.196772	0.328113	1.06788	0.821378	1.38835	NA	NA	NA	0.848926
BCAC_iCOGS	Sphinganine levels	Wald ratio	rs1354034	0.120369	0.0985779	0.222064	-0.0728433	0.313582	1.12791	0.929747	1.36832	NA	NA	NA	0.56177
BCAC_iCOGS	Sphingomyelin (d17:1_14:0, d16:1_15:0) levels	Inverse variance weighted	5	-0.0357054	0.046139	0.43901	-0.126138	0.054727	0.964924	0.881493	1.05625	NA	NA	NA	0.768267
BCAC_iCOGS	Sphingomyelin (d17:1_16:0, d18:1_15:0, d16:1_17:0) levels	Inverse variance weighted	15	-0.0100645	0.0235108	0.668593	-0.0561456	0.0360166	0.989986	0.945401	1.03667	NA	NA	NA	0.868052
BCAC_iCOGS	Sphingomyelin (d17:2_16:0, d18:2_15:0) levels	Inverse variance weighted	7	-0.0326747	0.0382362	0.392801	-0.107618	0.0422682	0.967853	0.897971	1.04317	NA	NA	NA	0.740071
BCAC_iCOGS	Sphingomyelin (d18:0_18:0, d19:0_17:0) levels	Wald ratio	rs680379	-0.129007	0.0997643	0.195969	-0.324545	0.0665305	0.878967	0.722856	1.06879	NA	NA	NA	0.527904
BCAC_iCOGS	Sphingomyelin (d18:0_20:0, d16:0_22:0) levels	Inverse variance weighted	8	-0.0602244	0.0358247	0.0927459	-0.130441	0.00999195	0.941553	0.877708	1.01004	NA	NA	NA	0.355037
BCAC_iCOGS	Sphingomyelin (d18:1_14:0, d16:1_16:0) levels	Inverse variance weighted	19	0.00907722	0.0205433	0.658592	-0.0311877	0.0493421	1.00912	0.969294	1.05058	NA	NA	NA	0.868052
BCAC_iCOGS	Sphingomyelin (d18:1_17:0, d17:1_18:0, d19:1_16:0) levels	Inverse variance weighted	7	-0.0433024	0.0420875	0.303542	-0.125794	0.0391891	0.957622	0.881797	1.03997	NA	NA	NA	0.675247
BCAC_iCOGS	Sphingomyelin (d18:1_18:1, d18:2_18:0) levels	Inverse variance weighted	7	0.0163252	0.0422204	0.699003	-0.0664268	0.0990772	1.01646	0.935731	1.10415	NA	NA	NA	0.886084
BCAC_iCOGS	Sphingomyelin (d18:1_19:0, d19:1_18:0) levels	Inverse variance weighted	13	-0.00950433	0.0250749	0.70466	-0.0586511	0.0396425	0.990541	0.943036	1.04044	NA	NA	NA	0.888723
BCAC_iCOGS	Sphingomyelin (d18:1_20:0, d16:1_22:0) levels	Inverse variance weighted	17	-0.0262194	0.0213902	0.220287	-0.0681442	0.0157054	0.974121	0.934126	1.01583	NA	NA	NA	0.56177
BCAC_iCOGS	Sphingomyelin (d18:1_20:1, d18:2_20:0) levels	Inverse variance weighted	12	0.0103636	0.0304229	0.733366	-0.0492652	0.0699924	1.01042	0.951929	1.0725	NA	NA	NA	0.896058
BCAC_iCOGS	Sphingomyelin (d18:1_20:2, d18:2_20:1, d16:1_22:2) levels	Inverse variance weighted	6	-0.0370814	0.0386462	0.337301	-0.112828	0.038665	0.963598	0.893304	1.03942	NA	NA	NA	0.689458
BCAC_iCOGS	Sphingomyelin (d18:1_21:0, d17:1_22:0, d16:1_23:0) levels	Inverse variance weighted	13	-0.0123385	0.0274905	0.653556	-0.0662198	0.0415428	0.987737	0.935925	1.04242	NA	NA	NA	0.868052
BCAC_iCOGS	Sphingomyelin (d18:1_22:1, d18:2_22:0, d16:1_24:1) levels	Inverse variance weighted	8	-0.0433503	0.0366579	0.236982	-0.1152	0.0284992	0.957576	0.891188	1.02891	NA	NA	NA	0.582223
BCAC_iCOGS	Sphingomyelin (d18:1_22:2, d18:2_22:1, d16:1_24:2) levels	Inverse variance weighted	7	-0.0523968	0.0374639	0.161935	-0.125826	0.0210325	0.948952	0.881768	1.02126	NA	NA	NA	0.47973
BCAC_iCOGS	Sphingomyelin (d18:1_25:0, d19:0_24:1, d20:1_23:0, d19:1_24:0) levels	Inverse variance weighted	9	-0.0251182	0.0275973	0.362733	-0.0792088	0.0289725	0.975195	0.923847	1.0294	NA	NA	NA	0.71045
BCAC_iCOGS	Sphingomyelin (d18:2_14:0, d18:1_14:1) levels	Wald ratio	rs174544	-0.0275948	0.117171	0.813815	-0.257251	0.202061	0.972782	0.773174	1.22392	NA	NA	NA	0.923914
BCAC_iCOGS	Sphingomyelin (d18:2_16:0, d18:1_16:1) levels	Wald ratio	rs174634	-0.0370953	0.150389	0.80517	-0.331858	0.257667	0.963584	0.717589	1.29391	NA	NA	NA	0.921429
BCAC_iCOGS	Sphingomyelin (d18:2_21:0, d16:2_23:0) levels	Inverse variance weighted	12	-0.0493317	0.0348755	0.157213	-0.117688	0.0190243	0.951865	0.888974	1.01921	NA	NA	NA	0.475079
BCAC_iCOGS	Sphingomyelin (d18:2_23:0, d18:1_23:1, d17:1_24:1) levels	Inverse variance weighted	4	-0.0674458	0.0624818	0.280388	-0.18991	0.0550184	0.934778	0.827033	1.05656	NA	NA	NA	0.641747
BCAC_iCOGS	Sphingomyelin (d18:2_23:1) levels	Inverse variance weighted	4	-0.0460325	0.0587127	0.433023	-0.161109	0.0690444	0.955011	0.851199	1.07148	NA	NA	NA	0.765003
BCAC_iCOGS	Sphingomyelin (d18:2_24:1, d18:1_24:2) levels	Wald ratio	rs174622	-0.148849	0.138568	0.282735	-0.420442	0.122744	0.861699	0.656756	1.1306	NA	NA	NA	0.644045
BCAC_iCOGS	Sphingosine 1-phosphate levels	Wald ratio	rs1000821	0.0524523	0.145679	0.718806	-0.233078	0.337982	1.05385	0.792092	1.40212	NA	NA	NA	0.888723
BCAC_iCOGS	Sphingosine levels	Wald ratio	rs1354034	0.109155	0.0893941	0.222064	-0.066057	0.284368	1.11534	0.936078	1.32892	NA	NA	NA	0.56177
BCAC_iCOGS	Sphingosine to phosphate ratio	Inverse variance weighted	2	0.142252	0.075769	0.0604567	-0.00625486	0.29076	1.15287	0.993765	1.33744	NA	NA	NA	0.25883
BCAC_iCOGS	Stearidonate (18:4n3) levels	Inverse variance weighted	2	0.014766	0.0768845	0.847699	-0.135927	0.16546	1.01488	0.872906	1.17994	NA	NA	NA	0.940907
BCAC_iCOGS	Stearoyl sphingomyelin (d18:1_18:0) levels	Inverse variance weighted	10	-0.00113904	0.0332067	0.972637	-0.0662242	0.0639461	0.998862	0.935921	1.06603	NA	NA	NA	0.99135
BCAC_iCOGS	Stearoylcarnitine levels	Inverse variance weighted	9	-0.0531282	0.0791909	0.502292	-0.208342	0.102086	0.948258	0.811929	1.10748	NA	NA	NA	0.800163
BCAC_iCOGS	Succinate to proline ratio	Inverse variance weighted	2	-0.0498441	0.0728861	0.494062	-0.192701	0.0930126	0.951378	0.824729	1.09748	NA	NA	NA	0.796311
BCAC_iCOGS	Succinimide levels	Wald ratio	rs16871364	-0.0097414	0.0852029	0.908975	-0.176739	0.157256	0.990306	0.837998	1.1703	NA	NA	NA	0.96695
BCAC_iCOGS	Succinoyltaurine levels	Inverse variance weighted	32	-0.0272402	0.0145072	0.0604219	-0.0556744	0.00119391	0.973127	0.945847	1.00119	NA	NA	NA	0.25883
BCAC_iCOGS	Succinylcarnitine levels	Inverse variance weighted	19	-0.0163133	0.0159459	0.30629	-0.0475673	0.0149407	0.983819	0.953546	1.01505	NA	NA	NA	0.675247
BCAC_iCOGS	Sulfate levels	Wald ratio	rs1343904	-0.0756638	0.125258	0.545802	-0.32117	0.169842	0.927128	0.7253	1.18512	NA	NA	NA	0.819969
BCAC_iCOGS	Sulfate of piperine metabolite C18H21NO3 (1) levels	Wald ratio	rs141471965	-0.212555	0.0993126	0.0323336	-0.407208	-0.0179023	0.808516	0.665506	0.982257	NA	NA	TRUE	0.179236
BCAC_iCOGS	Sulfate of piperine metabolite C18H21NO3 (3) levels	Wald ratio	rs141471965	-0.204896	0.0957341	0.0323336	-0.392535	-0.0172572	0.814732	0.675343	0.982891	NA	NA	TRUE	0.179236
BCAC_iCOGS	Tartronate (hydroxymalonate) levels	Inverse variance weighted	4	0.06737	0.0615868	0.273997	-0.0533401	0.18808	1.06969	0.948058	1.20693	NA	NA	NA	0.630128
BCAC_iCOGS	Taurine to glutamate ratio	Wald ratio	rs62354638	-0.0592973	0.135932	0.662671	-0.325724	0.207129	0.942426	0.722005	1.23014	NA	NA	NA	0.868052
BCAC_iCOGS	Tauro-beta-muricholate levels	Inverse variance weighted	16	-0.0337526	0.0164329	0.0399793	-0.0659612	-0.00154408	0.966811	0.936167	0.998457	0.075957	0.00662327	TRUE	0.20471
BCAC_iCOGS	Taurochenodeoxycholic acid 3-sulfate levels	Inverse variance weighted	11	0.0248534	0.0332194	0.454363	-0.0402565	0.0899634	1.02516	0.960543	1.09413	NA	NA	NA	0.779489
BCAC_iCOGS	Taurocholenate sulfate levels	Inverse variance weighted	10	0.0338451	0.0466159	0.467813	-0.0575221	0.125212	1.03442	0.944101	1.13339	NA	NA	NA	0.787967
BCAC_iCOGS	Taurodeoxycholic acid 3-sulfate levels	Inverse variance weighted	6	-0.0460901	0.0411685	0.262907	-0.12678	0.0346002	0.954956	0.880927	1.03521	NA	NA	NA	0.624158
BCAC_iCOGS	Taurolithocholate 3-sulfate levels	Inverse variance weighted	3	-0.0381155	0.0605876	0.529286	-0.156867	0.0806363	0.962602	0.854818	1.08398	NA	NA	NA	0.819969
BCAC_iCOGS	Tetradecadienedioate (C14:2-DC) levels	Inverse variance weighted	18	-0.0385596	0.0198485	0.0520526	-0.0774627	0.000343405	0.962174	0.925462	1.00034	NA	NA	NA	0.243504
BCAC_iCOGS	Tetradecadienoate (14:2) levels	Inverse variance weighted	4	-0.159863	0.0507555	0.00163454	-0.259344	-0.0603824	0.85226	0.771558	0.941404	0.679032	0.349311	TRUE	0.0215086
BCAC_iCOGS	Tetradecanedioate (C14-DC) levels	Inverse variance weighted	6	0.0538634	0.0206253	0.00901387	0.0134379	0.094289	1.05534	1.01353	1.09888	0.973274	0.79117	TRUE	0.0732568
BCAC_iCOGS	Tetrahydrocortisol glucuronide levels	Inverse variance weighted	5	0.0624192	0.0527764	0.236924	-0.0410226	0.165861	1.06441	0.959807	1.18041	NA	NA	NA	0.582223
BCAC_iCOGS	Theobromine levels	Inverse variance weighted	3	-0.104592	0.138264	0.449369	-0.37559	0.166405	0.900692	0.686884	1.18105	NA	NA	NA	0.777968
BCAC_iCOGS	Thioproline levels	Inverse variance weighted	2	-0.0917983	0.124211	0.459877	-0.335253	0.151656	0.912289	0.715157	1.16376	NA	NA	NA	0.785966
BCAC_iCOGS	Threonate levels	Inverse variance weighted	4	0.0490094	0.0625016	0.432964	-0.0734937	0.171512	1.05023	0.929142	1.1871	NA	NA	NA	0.765003
BCAC_iCOGS	Threonine levels	Inverse variance weighted	6	-0.0808291	0.0427585	0.0587094	-0.164636	0.00297757	0.922351	0.848203	1.00298	NA	NA	NA	0.25592
BCAC_iCOGS	Threonine to alpha-ketobutyrate ratio	Inverse variance weighted	3	-0.0405361	0.0563102	0.471605	-0.150904	0.069832	0.960275	0.85993	1.07233	NA	NA	NA	0.788377
BCAC_iCOGS	Threonine to pyruvate ratio	Inverse variance weighted	3	-0.0512299	0.0516791	0.321535	-0.152521	0.0500612	0.95006	0.858541	1.05134	NA	NA	NA	0.687397
BCAC_iCOGS	Thymol sulfate levels	Inverse variance weighted	4	-0.0384795	0.0512382	0.452657	-0.138906	0.0619474	0.962251	0.870309	1.06391	NA	NA	NA	0.777968
BCAC_iCOGS	Thyroxine levels	Wald ratio	rs6722076	0.0199171	0.110565	0.857043	-0.19679	0.236624	1.02012	0.821363	1.26696	NA	NA	NA	0.946894
BCAC_iCOGS	Thyroxine to taurocholate ratio	Wald ratio	rs76149982	-0.149294	0.16718	0.371852	-0.476967	0.17838	0.861316	0.620663	1.19528	NA	NA	NA	0.71045
BCAC_iCOGS	Trans-2-hexenoylglycine levels	Inverse variance weighted	5	0.0389684	0.0477823	0.414762	-0.0546848	0.132622	1.03974	0.946784	1.14182	NA	NA	NA	0.760842
BCAC_iCOGS	Trans-4-hydroxyproline levels	Inverse variance weighted	3	-0.0450346	0.0948127	0.634798	-0.230868	0.140798	0.955964	0.793845	1.15119	NA	NA	NA	0.858536
BCAC_iCOGS	Trans-urocanate levels	Inverse variance weighted	3	-0.00698213	0.0627787	0.911443	-0.130028	0.116064	0.993042	0.87807	1.12307	NA	NA	NA	0.96695
BCAC_iCOGS	Trans 3,4-methyleneheptanoate levels	Wald ratio	rs71373192	-0.0556831	0.105933	0.599135	-0.263312	0.151945	0.945839	0.768502	1.1641	NA	NA	NA	0.841245
BCAC_iCOGS	Tricosanoyl sphingomyelin (d18:1_23:0) levels	Inverse variance weighted	2	0.0327754	0.132481	0.804602	-0.226888	0.292438	1.03332	0.79701	1.33969	NA	NA	NA	0.921429
BCAC_iCOGS	Tridecenedioate (C13:1-DC) levels	Inverse variance weighted	2	-0.100096	0.0686193	0.144643	-0.23459	0.0343976	0.90475	0.790895	1.035	NA	NA	NA	0.460267
BCAC_iCOGS	Tryptophan betaine levels	Inverse variance weighted	36	0.105979	0.0198195	8.93291e-08	0.0671324	0.144825	1.1118	1.06944	1.15584	0.0258291	8.09441e-07	TRUE	8.56666e-06
BCAC_iCOGS	Tryptophan levels	Inverse variance weighted	5	0.297896	0.0523637	1.278e-08	0.195263	0.400529	1.34702	1.21563	1.49261	0.462324	0.38126	TRUE	1.84488e-06
BCAC_iCOGS	tryptophan to tyrosine ratio	Inverse variance weighted	5	-0.100759	0.111326	0.36542	-0.318958	0.117439	0.904151	0.726906	1.12461	NA	NA	NA	0.71045
BCAC_iCOGS	Tyrosine levels	Inverse variance weighted	7	0.199685	0.0475245	2.64878e-05	0.106537	0.292834	1.22102	1.11242	1.34022	0.0932468	0.0291336	TRUE	0.00112182
BCAC_iCOGS	Tyrosine to pyruvate ratio	Inverse variance weighted	3	0.0783378	0.139742	0.575078	-0.195556	0.352232	1.08149	0.822377	1.42224	NA	NA	NA	0.82667
BCAC_iCOGS	Undecenoylcarnitine (C11:1) levels	Inverse variance weighted	25	0.0568307	0.0205916	0.00578203	0.0164711	0.0971903	1.05848	1.01661	1.10207	0.110203	0.00244619	TRUE	0.0528092
BCAC_iCOGS	Urate levels	Inverse variance weighted	19	0.0709103	0.0260037	0.00639273	0.0199429	0.121878	1.07348	1.02014	1.12962	0.0548593	0.440976	TRUE	0.0565691
BCAC_iCOGS	Uridine levels	Inverse variance weighted	2	-0.0219042	0.0636672	0.730814	-0.146692	0.102883	0.978334	0.86356	1.10836	NA	NA	NA	0.896058
BCAC_iCOGS	Uridine to 2'-deoxyuridine ratio	Inverse variance weighted	3	0.028196	0.0502436	0.574671	-0.0702815	0.126673	1.0286	0.932131	1.13505	NA	NA	NA	0.82667
BCAC_iCOGS	Uridine to cytidine ratio	Inverse variance weighted	2	0.187615	0.0838692	0.0252869	0.0232311	0.351998	1.20637	1.0235	1.42191	0.915107	NA	TRUE	0.148774
BCAC_iCOGS	Uridine to pseudouridine ratio	Inverse variance weighted	3	-0.011482	0.0691167	0.868059	-0.146951	0.123987	0.988584	0.863337	1.132	NA	NA	NA	0.951884
BCAC_iCOGS	Ursodeoxycholate levels	Wald ratio	rs10504255	-0.215478	0.0954252	0.0239408	-0.402511	-0.0284442	0.806156	0.668639	0.971957	NA	NA	TRUE	0.144474
BCAC_iCOGS	Vanillactate levels	Inverse variance weighted	2	-0.110207	0.0939721	0.240892	-0.294392	0.0739787	0.895649	0.744984	1.07678	NA	NA	NA	0.587827
BCAC_iCOGS	Vanillic acid glycine levels	Inverse variance weighted	8	0.0696707	0.0365026	0.0563072	-0.00187439	0.141216	1.07216	0.998127	1.15167	NA	NA	NA	0.249003
BCAC_iCOGS	Vanillic alcohol sulfate levels	Inverse variance weighted	3	0.0219206	0.0705299	0.755954	-0.116318	0.160159	1.02216	0.890192	1.1737	NA	NA	NA	0.902349
BCAC_iCOGS	Vanillylmandelate (VMA) levels	Inverse variance weighted	4	-0.0264718	0.0988283	0.78881	-0.220175	0.167232	0.973876	0.802378	1.18203	NA	NA	NA	0.913931
BCAC_iCOGS	X-07765 levels	Inverse variance weighted	14	-0.142723	0.0294896	1.29985e-06	-0.200523	-0.0849234	0.866994	0.818303	0.918583	0.314363	0.689888	TRUE	8.90398e-05
BCAC_iCOGS	X-10458 levels	Inverse variance weighted	3	0.0459954	0.0454372	0.311401	-0.0430614	0.135052	1.04707	0.957853	1.1446	NA	NA	NA	0.682257
BCAC_iCOGS	X-11299 levels	Inverse variance weighted	2	0.0161374	0.187364	0.931364	-0.351096	0.383371	1.01627	0.703916	1.46722	NA	NA	NA	0.975085
BCAC_iCOGS	X-11308 levels	Inverse variance weighted	11	-0.0341121	0.02479	0.168807	-0.0827005	0.0144762	0.966463	0.920627	1.01458	NA	NA	NA	0.489083
BCAC_iCOGS	X-11315 levels	Inverse variance weighted	8	0.0128037	0.0429255	0.765492	-0.0713304	0.0969377	1.01289	0.931154	1.10179	NA	NA	NA	0.905187
BCAC_iCOGS	X-11372 levels	Wald ratio	rs8041483	-0.129816	0.115073	0.259271	-0.35536	0.0957275	0.878257	0.700921	1.10046	NA	NA	NA	0.618509
BCAC_iCOGS	X-11381 levels	Inverse variance weighted	22	-0.0370493	0.0383223	0.333653	-0.112161	0.0380624	0.963629	0.8939	1.0388	NA	NA	NA	0.687926
BCAC_iCOGS	X-11444 levels	Inverse variance weighted	59	-0.00271103	0.0104439	0.795188	-0.0231811	0.0177591	0.997293	0.977085	1.01792	NA	NA	NA	0.91657
BCAC_iCOGS	X-11470 levels	Inverse variance weighted	82	0.0238164	0.00935319	0.0108858	0.00548419	0.0421487	1.0241	1.0055	1.04305	0.64936	0.00233519	TRUE	0.0809262
BCAC_iCOGS	X-11478 levels	Inverse variance weighted	10	0.0167472	0.0433783	0.699443	-0.0682743	0.101769	1.01689	0.934004	1.10713	NA	NA	NA	0.886084
BCAC_iCOGS	X-11787 levels	Inverse variance weighted	46	0.0360637	0.0109028	0.000940536	0.0146941	0.0574333	1.03672	1.0148	1.05911	0.67656	0.210088	TRUE	0.0158241
BCAC_iCOGS	X-11795 levels	Wald ratio	rs146276253	0.0335985	0.124073	0.786547	-0.209584	0.276781	1.03417	0.810921	1.31888	NA	NA	NA	0.913931
BCAC_iCOGS	X-11849 levels	Wald ratio	rs165722	-0.0156098	0.0859528	0.855889	-0.184077	0.152858	0.984511	0.831872	1.16516	NA	NA	NA	0.94671
BCAC_iCOGS	X-11852 levels	Wald ratio	rs140587970	-0.00799665	0.151591	0.95793	-0.305114	0.289121	0.992035	0.737039	1.33525	NA	NA	NA	0.990472
BCAC_iCOGS	X-11880 levels	Wald ratio	rs13410335	-0.0307794	0.0977636	0.752887	-0.222396	0.160837	0.969689	0.800598	1.17449	NA	NA	NA	0.902349
BCAC_iCOGS	X-12007 levels	Wald ratio	rs1531022	-0.0912207	0.153002	0.551038	-0.391105	0.208664	0.912816	0.676309	1.23203	NA	NA	NA	0.820568
BCAC_iCOGS	X-12026 levels	Inverse variance weighted	2	0.0542467	0.0920366	0.555591	-0.126145	0.234638	1.05574	0.881487	1.26445	NA	NA	NA	0.82204
BCAC_iCOGS	X-12100 levels	Inverse variance weighted	5	-0.10659	0.0694421	0.124795	-0.242697	0.0295161	0.898894	0.784509	1.02996	NA	NA	NA	0.424059
BCAC_iCOGS	X-12101 levels	Inverse variance weighted	5	-0.107234	0.0346169	0.00195	-0.175084	-0.0393852	0.898315	0.839387	0.96138	0.881467	0.555546	TRUE	0.0242297
BCAC_iCOGS	X-12112 levels	Inverse variance weighted	81	0.0276785	0.00768818	0.000318049	0.0126097	0.0427473	1.02807	1.01269	1.04367	0.890125	0.233226	TRUE	0.00847247
BCAC_iCOGS	X-12117 levels	Inverse variance weighted	11	-0.032297	0.025146	0.19901	-0.0815832	0.0169892	0.968219	0.921656	1.01713	NA	NA	NA	0.531616
BCAC_iCOGS	X-12127 levels	Inverse variance weighted	2	-0.187263	0.102763	0.0684105	-0.388678	0.0141511	0.829225	0.677953	1.01425	NA	NA	NA	0.28251
BCAC_iCOGS	X-12216 levels	Inverse variance weighted	4	0.00589451	0.0674584	0.93037	-0.126324	0.138113	1.00591	0.881329	1.14811	NA	NA	NA	0.975085
BCAC_iCOGS	X-12410 levels	Inverse variance weighted	4	0.0683161	0.0478594	0.153455	-0.0254883	0.16212	1.0707	0.974834	1.176	NA	NA	NA	0.468672
BCAC_iCOGS	X-12411 levels	Inverse variance weighted	7	-0.0376909	0.0342641	0.271327	-0.104849	0.0294668	0.963011	0.900461	1.02991	NA	NA	NA	0.630031
BCAC_iCOGS	X-12544 levels	Wald ratio	rs74150870	-0.0523797	0.103253	0.611949	-0.254756	0.149996	0.948968	0.775106	1.16183	NA	NA	NA	0.84801
BCAC_iCOGS	X-12701 levels	Wald ratio	rs1960773	0.0626684	0.122313	0.608397	-0.177064	0.302401	1.06467	0.837726	1.3531	NA	NA	NA	0.846811
BCAC_iCOGS	X-12707 levels	Inverse variance weighted	26	0.0212729	0.0272636	0.435235	-0.0321638	0.0747095	1.0215	0.968348	1.07757	NA	NA	NA	0.765003
BCAC_iCOGS	X-12714 levels	Inverse variance weighted	7	0.038623	0.0300056	0.198026	-0.0201879	0.0974339	1.03938	0.980015	1.10234	NA	NA	NA	0.531616
BCAC_iCOGS	X-12798 levels	Inverse variance weighted	51	-0.0107634	0.00865415	0.213599	-0.0277255	0.0061987	0.989294	0.972655	1.00622	NA	NA	NA	0.561209
BCAC_iCOGS	X-12822 levels	Inverse variance weighted	17	0.00486223	0.0201875	0.809669	-0.0347053	0.0444298	1.00487	0.96589	1.04543	NA	NA	NA	0.922176
BCAC_iCOGS	X-12839 levels	Inverse variance weighted	2	0.0195634	0.0625847	0.754592	-0.103103	0.142229	1.01976	0.902034	1.15284	NA	NA	NA	0.902349
BCAC_iCOGS	X-12844 levels	Inverse variance weighted	15	-0.0125658	0.0309168	0.684419	-0.0731628	0.0480311	0.987513	0.92945	1.0492	NA	NA	NA	0.876545
BCAC_iCOGS	X-12847 levels	Inverse variance weighted	4	-0.007321	0.0516631	0.887312	-0.108581	0.0939387	0.992706	0.897107	1.09849	NA	NA	NA	0.965871
BCAC_iCOGS	X-12851 levels	Inverse variance weighted	2	-0.00302337	0.0918005	0.973727	-0.182952	0.176906	0.996981	0.832808	1.19352	NA	NA	NA	0.99135
BCAC_iCOGS	X-13431 levels	Inverse variance weighted	72	-0.0195711	0.00927892	0.0349275	-0.0377578	-0.0013844	0.980619	0.962946	0.998617	0.10308	0.899394	TRUE	0.18924
BCAC_iCOGS	X-13553 levels	Inverse variance weighted	2	0.151943	0.147919	0.304324	-0.137978	0.441863	1.16409	0.871118	1.5556	NA	NA	NA	0.675247
BCAC_iCOGS	X-13684 levels	Inverse variance weighted	11	0.0372887	0.033749	0.26921	-0.0288593	0.103437	1.03799	0.971553	1.10898	NA	NA	NA	0.628501
BCAC_iCOGS	X-13866 levels	Inverse variance weighted	16	-0.00595264	0.0194539	0.759615	-0.0440824	0.0321771	0.994065	0.956875	1.0327	NA	NA	NA	0.902349
BCAC_iCOGS	X-14939 levels	Inverse variance weighted	6	-0.012042	0.0318547	0.705408	-0.0744773	0.0503932	0.98803	0.928229	1.05168	NA	NA	NA	0.888723
BCAC_iCOGS	X-15486 levels	Inverse variance weighted	11	0.0143735	0.0289407	0.619434	-0.0423503	0.0710972	1.01448	0.958534	1.07369	NA	NA	NA	0.84801
BCAC_iCOGS	X-15503 levels	Inverse variance weighted	6	-0.0429037	0.0431643	0.320242	-0.127506	0.0416984	0.958004	0.880288	1.04258	NA	NA	NA	0.687397
BCAC_iCOGS	X-15523 levels	Inverse variance weighted	6	0.0043116	0.0047104	0.360015	-0.00492078	0.013544	1.00432	0.995091	1.01364	NA	NA	NA	0.709872
BCAC_iCOGS	X-16087 levels	Inverse variance weighted	20	0.00234016	0.0200225	0.906958	-0.0369039	0.0415842	1.00234	0.963769	1.04246	NA	NA	NA	0.96695
BCAC_iCOGS	X-16397 levels	Inverse variance weighted	5	-0.209994	0.0697696	0.00261401	-0.346743	-0.0732457	0.810589	0.706987	0.929372	0.0565675	0.0843821	TRUE	0.0298433
BCAC_iCOGS	X-16935 levels	Inverse variance weighted	15	-0.0318476	0.0215871	0.140131	-0.0741584	0.0104632	0.968654	0.928525	1.01052	NA	NA	NA	0.454662
BCAC_iCOGS	X-17010 levels	Wald ratio	rs174564	0.0256126	0.110696	0.817021	-0.191352	0.242577	1.02594	0.825842	1.27453	NA	NA	NA	0.924037
BCAC_iCOGS	X-17325 levels	Inverse variance weighted	2	0.11311	0.055111	0.0401309	0.00509219	0.221127	1.11975	1.00511	1.24748	0.769921	NA	TRUE	0.20471
BCAC_iCOGS	X-17328 levels	Wald ratio	rs1902023	-0.0614073	0.105719	0.561339	-0.268616	0.145802	0.94044	0.764436	1.15697	NA	NA	NA	0.822367
BCAC_iCOGS	X-17357 levels	Inverse variance weighted	11	0.0186593	0.0305488	0.54133	-0.0412163	0.0785349	1.01883	0.959622	1.0817	NA	NA	NA	0.819969
BCAC_iCOGS	X-17367 levels	Inverse variance weighted	3	0.0820751	0.0412514	0.0466313	0.00122242	0.162928	1.08554	1.00122	1.17695	0.818998	0.722127	TRUE	0.227002
BCAC_iCOGS	X-17653 levels	Inverse variance weighted	10	0.0713415	0.028967	0.0137837	0.0145661	0.128117	1.07395	1.01467	1.13669	0.244712	0.275421	TRUE	0.100141
BCAC_iCOGS	X-17654 levels	Inverse variance weighted	25	-0.0164032	0.0170158	0.335046	-0.0497542	0.0169478	0.983731	0.951463	1.01709	NA	NA	NA	0.688029
BCAC_iCOGS	X-17676 levels	Inverse variance weighted	4	-0.0173672	0.0675286	0.797037	-0.149723	0.114989	0.982783	0.860946	1.12186	NA	NA	NA	0.917119
BCAC_iCOGS	X-17685 levels	Wald ratio	rs1165150	0.037788	0.118501	0.749814	-0.194473	0.270049	1.03851	0.823268	1.31003	NA	NA	NA	0.902349
BCAC_iCOGS	X-17690 levels	Inverse variance weighted	32	-0.164201	0.0210178	5.60742e-15	-0.205396	-0.123006	0.848571	0.814325	0.884258	0.0689709	0.177289	TRUE	2.68876e-12
BCAC_iCOGS	X-18886 levels	Inverse variance weighted	2	0.0936392	0.0814863	0.250498	-0.0660739	0.253352	1.09816	0.936062	1.28834	NA	NA	NA	0.606058
BCAC_iCOGS	X-18888 levels	Inverse variance weighted	4	-0.199971	0.0854237	0.0192354	-0.367402	-0.032541	0.818754	0.692531	0.967983	0.109601	0.909763	TRUE	0.123851
BCAC_iCOGS	X-18913 levels	Inverse variance weighted	3	0.200401	0.0591492	0.000703885	0.0844687	0.316333	1.22189	1.08814	1.37209	0.930137	0.780859	TRUE	0.0139515
BCAC_iCOGS	X-18921 levels	Inverse variance weighted	22	-0.0644629	0.0180834	0.000364187	-0.0999062	-0.0290195	0.937571	0.904922	0.971398	0.212281	0.44225	TRUE	0.00919092
BCAC_iCOGS	X-18922 levels	Inverse variance weighted	8	0.0545699	0.0300714	0.0695731	-0.00436998	0.11351	1.05609	0.99564	1.1202	NA	NA	NA	0.284406
BCAC_iCOGS	X-18935 levels	Wald ratio	rs56113850	-0.0818521	0.105033	0.435802	-0.287716	0.124012	0.921408	0.749975	1.13203	NA	NA	NA	0.765003
BCAC_iCOGS	X-19141 levels	Inverse variance weighted	135	0.0283485	0.0110159	0.01007	0.00675734	0.0499397	1.02875	1.00678	1.05121	3.25673e-06	0.069491	TRUE	0.0778659
BCAC_iCOGS	X-19438 levels	Wald ratio	rs7866466	-0.0168993	0.140682	0.904385	-0.292635	0.258837	0.983243	0.746294	1.29542	NA	NA	NA	0.96695
BCAC_iCOGS	X-21258 levels	Inverse variance weighted	7	-0.0304223	0.0285959	0.287387	-0.0864702	0.0256256	0.970036	0.917163	1.02596	NA	NA	NA	0.653091
BCAC_iCOGS	X-21283 levels	Inverse variance weighted	13	-0.0661058	0.0163437	5.23836e-05	-0.0981394	-0.0340722	0.936032	0.906523	0.966502	0.738249	0.0904111	TRUE	0.00186059
BCAC_iCOGS	X-21285 levels	Inverse variance weighted	20	-0.135847	0.0251038	6.2525e-08	-0.185051	-0.0866439	0.872976	0.831062	0.917004	0.155859	0.0773521	TRUE	6.66239e-06
BCAC_iCOGS	X-21286 levels	Inverse variance weighted	4	-0.0225707	0.0983367	0.818461	-0.215311	0.170169	0.977682	0.806291	1.18551	NA	NA	NA	0.924504
BCAC_iCOGS	X-21310 levels	Wald ratio	rs146593209	0.0796612	0.145525	0.584101	-0.205568	0.364891	1.08292	0.814184	1.44036	NA	NA	NA	0.829856
BCAC_iCOGS	X-21312 levels	Inverse variance weighted	35	-0.178911	0.014694	4.18342e-34	-0.207712	-0.150111	0.83618	0.812441	0.860612	0.97144	0.119212	TRUE	4.0119e-31
BCAC_iCOGS	X-21319 levels	Inverse variance weighted	3	-0.00750704	0.0911162	0.934337	-0.186095	0.171081	0.992521	0.830195	1.18659	NA	NA	NA	0.97707
BCAC_iCOGS	X-21353 levels	Inverse variance weighted	7	-0.157061	0.0319958	9.16399e-07	-0.219772	-0.0943489	0.854652	0.802701	0.909965	0.980053	0.914713	TRUE	6.7602e-05
BCAC_iCOGS	X-21364 levels	Inverse variance weighted	4	0.0117035	0.0539567	0.828282	-0.0940517	0.117459	1.01177	0.910236	1.12464	NA	NA	NA	0.929032
BCAC_iCOGS	X-21383 levels	Wald ratio	rs137909323	0.102789	0.130783	0.431893	-0.153544	0.359123	1.10826	0.857663	1.43207	NA	NA	NA	0.765003
BCAC_iCOGS	X-21441 levels	Inverse variance weighted	22	0.0153395	0.0163999	0.349613	-0.0168043	0.0474834	1.01546	0.983336	1.04863	NA	NA	NA	0.698498
BCAC_iCOGS	X-21442 levels	Inverse variance weighted	2	0.0419176	0.0754492	0.578502	-0.105963	0.189798	1.04281	0.899458	1.20901	NA	NA	NA	0.828035
BCAC_iCOGS	X-21467 levels	Inverse variance weighted	15	0.0219321	0.0242001	0.364787	-0.0255001	0.0693644	1.02217	0.974822	1.07183	NA	NA	NA	0.71045
BCAC_iCOGS	X-21470 levels	Inverse variance weighted	13	-0.052376	0.025161	0.0373758	-0.101692	-0.00306047	0.948972	0.903308	0.996944	0.461824	0.268614	TRUE	0.193748
BCAC_iCOGS	X-21471 levels	Inverse variance weighted	21	0.00495419	0.0172506	0.773967	-0.0288569	0.0387653	1.00497	0.971555	1.03953	NA	NA	NA	0.908487
BCAC_iCOGS	X-21607 levels	Inverse variance weighted	23	-0.00462264	0.0215151	0.82988	-0.0467923	0.037547	0.995388	0.954286	1.03826	NA	NA	NA	0.929737
BCAC_iCOGS	X-21733 levels	Inverse variance weighted	3	0.0787815	0.0767876	0.304907	-0.0717221	0.229285	1.08197	0.93079	1.2577	NA	NA	NA	0.675247
BCAC_iCOGS	X-21736 levels	Inverse variance weighted	3	0.244184	0.0699593	0.000482347	0.107064	0.381304	1.27658	1.11301	1.46419	0.914185	0.749646	TRUE	0.0110136
BCAC_iCOGS	X-21796 levels	Inverse variance weighted	2	-0.044897	0.050247	0.371575	-0.143381	0.0535871	0.956096	0.866424	1.05505	NA	NA	NA	0.71045
BCAC_iCOGS	X-21821 levels	Wald ratio	rs1133607	-0.0397214	0.141181	0.778441	-0.316436	0.236993	0.961057	0.728742	1.26743	NA	NA	NA	0.909673
BCAC_iCOGS	X-21829 levels	Inverse variance weighted	8	0.00629499	0.0365733	0.863344	-0.0653887	0.0779787	1.00631	0.936703	1.0811	NA	NA	NA	0.949091
BCAC_iCOGS	X-21834 levels	Inverse variance weighted	6	-0.0378418	0.0384525	0.325058	-0.113209	0.0375251	0.962865	0.892964	1.03824	NA	NA	NA	0.687926
BCAC_iCOGS	X-22162 levels	Inverse variance weighted	12	-0.00947726	0.0176786	0.591898	-0.0441272	0.0251727	0.990568	0.956832	1.02549	NA	NA	NA	0.835753
BCAC_iCOGS	X-22520 levels	Inverse variance weighted	3	0.0679483	0.0691737	0.32596	-0.0676323	0.203529	1.07031	0.934604	1.22572	NA	NA	NA	0.687926
BCAC_iCOGS	X-23276 levels	Wald ratio	rs72684411	0.0622241	0.100864	0.537295	-0.13547	0.259918	1.0642	0.873306	1.29682	NA	NA	NA	0.819969
BCAC_iCOGS	X-23639 levels	Inverse variance weighted	3	0.140418	0.0920634	0.127202	-0.0400263	0.320862	1.15075	0.960764	1.37832	NA	NA	NA	0.424059
BCAC_iCOGS	X-23641 levels	Inverse variance weighted	12	-0.0027942	0.0477371	0.953324	-0.0963589	0.0907705	0.99721	0.908138	1.09502	NA	NA	NA	0.989435
BCAC_iCOGS	X-23644 levels	Inverse variance weighted	3	-0.143922	0.0562387	0.0104938	-0.254149	-0.0336936	0.865956	0.775576	0.966868	0.872526	0.704122	TRUE	0.0798696
BCAC_iCOGS	X-23654 levels	Inverse variance weighted	10	0.0606341	0.0263748	0.0215081	0.00893955	0.112329	1.06251	1.00898	1.11888	0.963821	0.697533	TRUE	0.134812
BCAC_iCOGS	X-23659 levels	Inverse variance weighted	10	-0.069894	0.025622	0.00637412	-0.120113	-0.0196748	0.932493	0.88682	0.980517	0.990268	0.767052	TRUE	0.0565691
BCAC_iCOGS	X-23678 levels	Wald ratio	rs72720588	0.147335	0.113414	0.193913	-0.0749564	0.369626	1.15874	0.927784	1.44719	NA	NA	NA	0.526857
BCAC_iCOGS	X-23680 levels	Inverse variance weighted	13	0.118054	0.0223795	1.32686e-07	0.0741903	0.161918	1.1253	1.07701	1.17576	0.951312	0.603922	TRUE	1.06038e-05
BCAC_iCOGS	X-23739 levels	Inverse variance weighted	14	-0.051342	0.0283047	0.0696929	-0.106819	0.00413528	0.949954	0.898688	1.00414	NA	NA	NA	0.284406
BCAC_iCOGS	X-23780 levels	Inverse variance weighted	11	-0.0814848	0.0280012	0.00361378	-0.136367	-0.0266024	0.921747	0.872522	0.973748	0.994702	0.717375	TRUE	0.0368408
BCAC_iCOGS	X-23974 levels	Inverse variance weighted	2	-0.0987545	0.0770919	0.200195	-0.249855	0.0523457	0.905965	0.778914	1.05374	NA	NA	NA	0.531913
BCAC_iCOGS	X-23997 levels	Wald ratio	rs17455169	0.137792	0.152002	0.364661	-0.160131	0.435716	1.14774	0.852032	1.54607	NA	NA	NA	0.71045
BCAC_iCOGS	X-24241 levels	Inverse variance weighted	10	-0.0816277	0.0754902	0.279563	-0.229589	0.0663331	0.921615	0.794861	1.06858	NA	NA	NA	0.641389
BCAC_iCOGS	X-24243 levels	Inverse variance weighted	7	-0.0263936	0.0375255	0.481836	-0.0999437	0.0471564	0.973952	0.904888	1.04829	NA	NA	NA	0.790753
BCAC_iCOGS	X-24328 levels	Inverse variance weighted	19	-0.206207	0.0268565	1.61438e-14	-0.258846	-0.153569	0.813664	0.771942	0.857642	0.357668	0.187813	TRUE	5.16062e-12
BCAC_iCOGS	X-24334 levels	Inverse variance weighted	2	0.0305598	0.0554024	0.581225	-0.0780289	0.139148	1.03103	0.924938	1.14929	NA	NA	NA	0.829052
BCAC_iCOGS	X-24337 levels	Inverse variance weighted	6	-0.0121338	0.0336119	0.718103	-0.0780132	0.0537456	0.98794	0.924952	1.05522	NA	NA	NA	0.888723
BCAC_iCOGS	X-24418 levels	Inverse variance weighted	25	-0.00813837	0.0136073	0.549781	-0.0348087	0.018532	0.991895	0.96579	1.0187	NA	NA	NA	0.819969
BCAC_iCOGS	X-24494 levels	Inverse variance weighted	32	-0.0315243	0.016519	0.0563437	-0.0639016	0.000852917	0.968967	0.938097	1.00085	NA	NA	NA	0.249003
BCAC_iCOGS	X-24518 levels	Inverse variance weighted	25	-0.0705565	0.012751	3.14021e-08	-0.0955484	-0.0455647	0.931875	0.908874	0.955458	0.901515	0.826385	TRUE	3.76433e-06
BCAC_iCOGS	X-24531 levels	Inverse variance weighted	5	0.00723231	0.0370193	0.845106	-0.0653255	0.0797902	1.00726	0.936762	1.08306	NA	NA	NA	0.939116
BCAC_iCOGS	X-24544 levels	Inverse variance weighted	40	-0.0390522	0.0119319	0.00106445	-0.0624387	-0.0156656	0.961701	0.939471	0.984456	0.488217	0.974938	TRUE	0.0170134
BCAC_iCOGS	X-24546 levels	Inverse variance weighted	12	0.0220849	0.0213122	0.300082	-0.019687	0.0638567	1.02233	0.980506	1.06594	NA	NA	NA	0.673956
BCAC_iCOGS	X-24556 levels	Inverse variance weighted	17	-0.00504692	0.0207814	0.808116	-0.0457784	0.0356846	0.994966	0.955254	1.03633	NA	NA	NA	0.922176
BCAC_iCOGS	X-24585 levels	Wald ratio	rs2997922	-0.0269845	0.111722	0.809142	-0.245959	0.19199	0.973376	0.781954	1.21166	NA	NA	NA	0.922176
BCAC_iCOGS	X-24588 levels	Inverse variance weighted	28	0.0109882	0.0180935	0.543651	-0.024475	0.0464514	1.01105	0.975822	1.04755	NA	NA	NA	0.819969
BCAC_iCOGS	X-24736 levels	Inverse variance weighted	12	0.00795047	0.0179362	0.657575	-0.0272045	0.0431054	1.00798	0.973162	1.04405	NA	NA	NA	0.868052
BCAC_iCOGS	X-24757 levels	Wald ratio	rs1047891	0.157985	0.100147	0.114676	-0.0383044	0.354273	1.17115	0.96242	1.42514	NA	NA	NA	0.405809
BCAC_iCOGS	X-24795 levels	Wald ratio	rs1047891	0.1187	0.0752445	0.114676	-0.0287795	0.266179	1.12603	0.971631	1.30497	NA	NA	NA	0.405809
BCAC_iCOGS	X-24801 levels	Inverse variance weighted	15	0.0556582	0.0264252	0.0351825	0.00386474	0.107452	1.05724	1.00387	1.11344	0.97861	0.276775	TRUE	0.189551
BCAC_iCOGS	X-24812 levels	Wald ratio	rs1171617	0.0889288	0.124752	0.475942	-0.155585	0.333443	1.093	0.855914	1.39577	NA	NA	NA	0.790373
BCAC_iCOGS	X-24947 levels	Inverse variance weighted	67	-0.00356375	0.0122694	0.771465	-0.0276117	0.0204842	0.996443	0.972766	1.0207	NA	NA	NA	0.907773
BCAC_iCOGS	X-24949 levels	Inverse variance weighted	17	0.0137454	0.0196278	0.483738	-0.0247251	0.052216	1.01384	0.975578	1.0536	NA	NA	NA	0.790896
BCAC_iCOGS	X-24978 levels	Wald ratio	rs603424	-0.0744349	0.0764422	0.330185	-0.224262	0.0753918	0.928268	0.799106	1.07831	NA	NA	NA	0.687926
BCAC_iCOGS	X-25109 levels	Inverse variance weighted	5	0.110927	0.0438046	0.0113311	0.0250701	0.196784	1.11731	1.02539	1.21748	0.462732	0.319042	TRUE	0.083589
BCAC_iCOGS	X-25371 levels	Inverse variance weighted	14	0.0198421	0.0220849	0.368948	-0.0234443	0.0631284	1.02004	0.976828	1.06516	NA	NA	NA	0.71045
BCAC_iCOGS	X-25420 levels	Wald ratio	rs715	-0.193689	0.103938	0.0623918	-0.397409	0.01003	0.823914	0.672059	1.01008	NA	NA	NA	0.263442
BCAC_iCOGS	X-25422 levels	Inverse variance weighted	17	0.0256356	0.0250265	0.305676	-0.0234164	0.0746876	1.02597	0.976856	1.07755	NA	NA	NA	0.675247
BCAC_iCOGS	X-25433 levels	Inverse variance weighted	6	0.0395329	0.0475245	0.405498	-0.0536152	0.132681	1.04032	0.947797	1.14189	NA	NA	NA	0.752171
BCAC_iCOGS	X-25790 levels	Inverse variance weighted	2	-0.12198	0.105211	0.2463	-0.328193	0.0842337	0.885166	0.720224	1.08788	NA	NA	NA	0.597979
BCAC_iCOGS	X-25810 levels	Inverse variance weighted	4	0.0889688	0.0582884	0.126922	-0.0252765	0.203214	1.09305	0.97504	1.22533	NA	NA	NA	0.424059
BCAC_iCOGS	X-26054 levels	Inverse variance weighted	30	-0.0153966	0.0139087	0.268304	-0.0426577	0.0118645	0.984721	0.958239	1.01194	NA	NA	NA	0.628501
BCAC_iCOGS	X-26109 levels	Inverse variance weighted	52	0.000484658	0.0114354	0.966194	-0.0219287	0.022898	1.00048	0.97831	1.02316	NA	NA	NA	0.99135
BCAC_iCOGS	X-26111 levels	Inverse variance weighted	6	-0.00595763	0.0658496	0.927911	-0.135023	0.123107	0.99406	0.873696	1.13101	NA	NA	NA	0.974662
BCAC_iCOGS	Xanthurenate levels	Inverse variance weighted	7	-0.0137483	0.0378765	0.716622	-0.0879862	0.0604896	0.986346	0.915774	1.06236	NA	NA	NA	0.888723
BCAC_iCOGS	Ximenoylcarnitine (C26:1) levels	Inverse variance weighted	20	-0.0450707	0.0291769	0.12241	-0.102257	0.0121161	0.95593	0.902797	1.01219	NA	NA	NA	0.42227

## Sheet: Sheet4
Table S4 The proxy SNPs for all metabolites
metabolite	SNP	effect_allele.exposure	other_allele.exposure	beta.exposure	se.exposure	eaf.exposure	pval.exposure	chr.exposure	pos.exposure	samplesize.exposure	exposure	mr_keep.exposure	R2	f
(2 or 3)-decenoate (10~1n7 or n8) levels	rs659305	G	A	0.15819	0.016168	0.315962	1.31698e-22	6	4125421	8124	exposure	TRUE	0.0108169	88.8156
(2 or 3)-decenoate (10~1n7 or n8) levels	rs151154986	A	G	-0.345378	0.0444053	0.0293248	7.37651e-15	14	73573432	8124	exposure	TRUE	0.00679092	55.5329
(2 or 3)-decenoate (10~1n7 or n8) levels	rs76861057	C	A	-0.112126	0.0175515	0.255677	1.676e-10	14	73615401	8124	exposure	TRUE	0.00478515	39.0519
(2 or 3)-decenoate (10~1n7 or n8) levels	rs146968042	T	C	-0.306001	0.0519616	0.0214954	3.88588e-09	14	73569796	8124	exposure	TRUE	0.00393898	32.1189
(2 or 3)-decenoate (10~1n7 or n8) levels	rs35259237	A	C	-0.356765	0.0646892	0.0130715	3.4866e-08	14	73424129	8124	exposure	TRUE	0.00328402	26.7607
(N(1) + N(8))-acetylspermidine levels	rs62492368	A	G	-0.260473	0.015934	0.303374	4.57287e-60	7	150840547	8219	exposure	TRUE	0.028677	242.596
(N(1) + N(8))-acetylspermidine levels	rs148381953	G	A	0.788665	0.0553901	0.0179115	5.29552e-46	22	50123655	8219	exposure	TRUE	0.0218825	183.832
(N(1) + N(8))-acetylspermidine levels	rs1049742	T	C	0.360862	0.0272092	0.0783478	3.81787e-40	7	150857465	8219	exposure	TRUE	0.0188064	157.494
(N(1) + N(8))-acetylspermidine levels	rs543237456	C	G	0.685322	0.0543081	0.0188172	1.65587e-36	22	50307702	8219	exposure	TRUE	0.017343	145.023
(N(1) + N(8))-acetylspermidine levels	rs4240520	A	G	-0.259277	0.0221341	0.874543	1.08192e-31	10	133383915	8219	exposure	TRUE	0.0147514	123.027
(N(1) + N(8))-acetylspermidine levels	rs56282717	A	G	0.160913	0.0172875	0.2433	1.30223e-20	7	150960007	8219	exposure	TRUE	0.00953406	79.0955
(N(1) + N(8))-acetylspermidine levels	rs79043825	A	C	-0.328966	0.0374887	0.0397125	1.70804e-18	7	150921813	8219	exposure	TRUE	0.00825393	68.387
(N(1) + N(8))-acetylspermidine levels	rs2269001	A	G	-0.139873	0.018374	0.206581	2.68811e-14	7	150954728	8219	exposure	TRUE	0.00641344	53.0394
(N(1) + N(8))-acetylspermidine levels	rs2275724	T	C	-0.138157	0.0186022	0.801283	1.1116e-13	10	133275237	8219	exposure	TRUE	0.0060785	50.2525
(N(1) + N(8))-acetylspermidine levels	rs62490441	T	C	0.144888	0.0195288	0.173687	1.17818e-13	7	150824725	8219	exposure	TRUE	0.00602569	49.8132
(N(1) + N(8))-acetylspermidine levels	rs9617077	A	G	0.134685	0.0198608	0.163557	1.19006e-11	22	50111984	8219	exposure	TRUE	0.00496334	40.9872
(N(1) + N(8))-acetylspermidine levels	rs12252576	C	T	0.105938	0.0158806	0.306509	2.54178e-11	10	133413740	8219	exposure	TRUE	0.00477109	39.392
(N(1) + N(8))-acetylspermidine levels	rs2052130	A	G	-0.135979	0.0213545	0.139013	1.91878e-10	7	150851510	8219	exposure	TRUE	0.00442615	36.5313
(N(1) + N(8))-acetylspermidine levels	rs2235355	T	C	0.130734	0.0205762	0.14708	2.10261e-10	22	50258219	8219	exposure	TRUE	0.00428814	35.3874
(N(1) + N(8))-acetylspermidine levels	rs11818389	C	T	0.196927	0.0314094	0.058723	3.61789e-10	10	133364815	8219	exposure	TRUE	0.00428713	35.379
(N(1) + N(8))-acetylspermidine levels	rs11101669	T	C	0.172062	0.0275517	0.0773562	4.23613e-10	10	133253876	8219	exposure	TRUE	0.004226	34.8724
(N(1) + N(8))-acetylspermidine levels	rs3918174	G	A	0.126535	0.0203961	0.154866	5.50917e-10	7	151000206	8219	exposure	TRUE	0.00419115	34.5836
(N(1) + N(8))-acetylspermidine levels	rs12259185	A	G	0.195145	0.0320426	0.0557589	1.12781e-09	10	133437112	8219	exposure	TRUE	0.00400998	33.0826
(N(1) + N(8))-acetylspermidine levels	rs3800788	C	T	-0.120184	0.0198126	0.172442	1.31081e-09	7	151016652	8219	exposure	TRUE	0.00412254	34.0151
(N(1) + N(8))-acetylspermidine levels	rs11101706	T	C	-0.0956863	0.0162587	0.285749	3.97451e-09	10	133354371	8219	exposure	TRUE	0.00373736	30.8251
(N(1) + N(8))-acetylspermidine levels	rs974570	A	G	0.141842	0.024213	0.103391	4.68209e-09	22	50191684	8219	exposure	TRUE	0.00373014	30.7653
(N(1) + N(8))-acetylspermidine levels	rs1187208	G	A	0.127625	0.0227854	0.88155	2.12866e-08	4	86707772	8219	exposure	TRUE	0.0034016	28.0464
(N(1) + N(8))-acetylspermidine levels	rs7660964	G	T	0.124736	0.0226399	0.879836	3.59733e-08	4	86596456	8219	exposure	TRUE	0.00328995	27.1228
(N(1) + N(8))-acetylspermidine levels	rs76219940	A	G	0.179873	0.0326715	0.0529842	3.68126e-08	7	151103514	8219	exposure	TRUE	0.00324687	26.7665
(N(1) + N(8))-acetylspermidine levels	rs59540563	T	C	0.107283	0.0195995	0.168214	4.40564e-08	10	133144983	8219	exposure	TRUE	0.00322081	26.5509
(R)-3-hydroxybutyrylcarnitine levels	rs1171617	T	G	0.118083	0.0190416	0.771201	5.59871e-10	10	59707424	7787	exposure	TRUE	0.0049207	38.497
(R)-3-hydroxybutyrylcarnitine levels	rs7727038	T	C	-0.0863273	0.015777	0.553085	4.45657e-08	5	132254564	7787	exposure	TRUE	0.0036842	28.7876
(S)-3-hydroxybutyrylcarnitine levels	rs7541058	T	C	0.152383	0.0151211	0.336863	6.94779e-24	1	75734132	8249	exposure	TRUE	0.0103743	86.4539
(S)-3-hydroxybutyrylcarnitine levels	rs1171615	T	C	0.167639	0.017506	0.770367	1.00773e-21	10	59709332	8249	exposure	TRUE	0.00994288	82.8224
(S)-3-hydroxybutyrylcarnitine levels	rs1770890	G	A	-0.156479	0.0168265	0.759497	1.41061e-20	1	75935432	8249	exposure	TRUE	0.00894517	74.4367
(S)-3-hydroxybutyrylcarnitine levels	rs12136360	T	C	0.149402	0.01629	0.26511	4.66966e-20	1	75834256	8249	exposure	TRUE	0.00869744	72.3571
(S)-3-hydroxybutyrylcarnitine levels	rs211737	G	A	-0.140799	0.0158784	0.701341	7.48873e-19	1	75631396	8249	exposure	TRUE	0.00830489	69.064
(S)-3-hydroxybutyrylcarnitine levels	rs10826337	A	G	0.0947671	0.0148878	0.403641	1.9473e-10	10	59649711	8249	exposure	TRUE	0.00432363	35.8118
(S)-3-hydroxybutyrylcarnitine levels	rs7923092	C	A	-0.0864462	0.0155322	0.320282	2.61229e-08	10	59715291	8249	exposure	TRUE	0.00325374	26.9212
(S)-a-amino-omega-caprolactam levels	rs1570805	T	C	0.140763	0.0229274	0.106352	8.27775e-10	1	156294857	8185	exposure	TRUE	0.00376634	30.9365
(S)-a-amino-omega-caprolactam levels	rs2863979	A	G	-0.0912402	0.0157196	0.718054	6.46592e-09	16	68297987	8185	exposure	TRUE	0.00337074	27.6761
(S)-a-amino-omega-caprolactam levels	rs118162901	G	A	-0.292046	0.0511374	0.0189556	1.12313e-08	11	113180763	8185	exposure	TRUE	0.00317219	26.0406
1-(1-enyl-palmitoyl)-2-arachidonoyl-gpc (p-16~0_20~4) levels	rs102275	C	T	-0.475997	0.0152485	0.344959	1e-200	11	61790331	8251	exposure	TRUE	0.102394	941.001
1-(1-enyl-palmitoyl)-2-arachidonoyl-gpc (p-16~0_20~4) levels	rs174465	T	C	0.283334	0.0163617	0.683385	3.50956e-67	11	61891328	8251	exposure	TRUE	0.0347396	296.88
1-(1-enyl-palmitoyl)-2-arachidonoyl-gpc (p-16~0_20~4) levels	rs72719193	A	G	-0.226397	0.0151003	0.477783	8.16967e-51	14	67502391	8251	exposure	TRUE	0.0255772	216.524
1-(1-enyl-palmitoyl)-2-arachidonoyl-gpc (p-16~0_20~4) levels	rs198462	A	G	0.172893	0.0151537	0.499575	3.75763e-30	11	61756647	8251	exposure	TRUE	0.014946	125.16
1-(1-enyl-palmitoyl)-2-arachidonoyl-gpc (p-16~0_20~4) levels	rs7118175	T	C	0.294593	0.0283368	0.921472	2.58157e-25	11	61871886	8251	exposure	TRUE	0.0125598	104.923
1-(1-enyl-palmitoyl)-2-arachidonoyl-gpc (p-16~0_20~4) levels	rs174467	G	T	0.206829	0.0217034	0.151472	1.57633e-21	11	61895189	8251	exposure	TRUE	0.0109964	91.7181
1-(1-enyl-palmitoyl)-2-arachidonoyl-gpc (p-16~0_20~4) levels	rs79303190	C	T	-0.33208	0.0352699	0.0491435	4.71269e-21	11	61850544	8251	exposure	TRUE	0.0103062	85.9007
1-(1-enyl-palmitoyl)-2-arachidonoyl-gpc (p-16~0_20~4) levels	rs1692120	A	G	0.143249	0.015253	0.471299	5.91343e-21	11	61650000	8251	exposure	TRUE	0.0102263	85.2286
1-(1-enyl-palmitoyl)-2-arachidonoyl-gpc (p-16~0_20~4) levels	rs139957766	A	G	-0.44191	0.0485148	0.0254133	8.33214e-20	11	61839575	8251	exposure	TRUE	0.0096734	80.5753
1-(1-enyl-palmitoyl)-2-arachidonoyl-gpc (p-16~0_20~4) levels	rs2736604	A	C	-0.257093	0.0300056	0.0690053	1.05143e-17	11	61932355	8251	exposure	TRUE	0.00849259	70.6554
1-(1-enyl-palmitoyl)-2-arachidonoyl-gpc (p-16~0_20~4) levels	rs174569	C	T	-0.480042	0.057478	0.0177357	6.72615e-17	11	61826692	8251	exposure	TRUE	0.00802907	66.7679
1-(1-enyl-palmitoyl)-2-arachidonoyl-gpc (p-16~0_20~4) levels	rs972354	T	C	-0.204592	0.0249953	0.101167	2.71817e-16	11	61950135	8251	exposure	TRUE	0.00761246	63.2769
1-(1-enyl-palmitoyl)-2-arachidonoyl-gpc (p-16~0_20~4) levels	rs740006	C	T	0.193702	0.0256566	0.0987776	4.35989e-14	11	61790396	8251	exposure	TRUE	0.00668019	55.4755
1-(1-enyl-palmitoyl)-2-arachidonoyl-gpc (p-16~0_20~4) levels	rs3758977	G	T	-0.118923	0.0160708	0.345489	1.36227e-13	11	61969772	8251	exposure	TRUE	0.00639607	53.1008
1-(1-enyl-palmitoyl)-2-arachidonoyl-gpc (p-16~0_20~4) levels	rs117983270	C	T	-0.269954	0.0392445	0.0381628	6.03648e-12	11	61844238	8251	exposure	TRUE	0.00534997	44.3693
1-(1-enyl-palmitoyl)-2-arachidonoyl-gpc (p-16~0_20~4) levels	rs482548	T	C	0.166126	0.0253917	0.100548	6.04818e-11	11	61865710	8251	exposure	TRUE	0.00499179	41.3839
1-(1-enyl-palmitoyl)-2-arachidonoyl-gpc (p-16~0_20~4) levels	rs12928099	A	C	0.106269	0.0167839	0.29154	2.42616e-10	16	15056648	8251	exposure	TRUE	0.00466505	38.6624
1-(1-enyl-palmitoyl)-2-arachidonoyl-gpc (p-16~0_20~4) levels	rs116962591	T	C	-0.306305	0.0499231	0.0238095	8.48746e-10	11	61894976	8251	exposure	TRUE	0.00436137	36.1345
1-(1-enyl-palmitoyl)-2-arachidonoyl-gpc (p-16~0_20~4) levels	rs72721018	G	A	0.124962	0.0203934	0.180616	8.92217e-10	14	67526957	8251	exposure	TRUE	0.004622	38.3039
1-(1-enyl-palmitoyl)-2-arachidonoyl-gpc (p-16~0_20~4) levels	rs2038491	A	G	0.0996576	0.0165145	0.68785	1.5942e-09	14	67591159	8251	exposure	TRUE	0.00426489	35.3318
1-(1-enyl-palmitoyl)-2-arachidonoyl-gpc (p-16~0_20~4) levels	rs11230735	T	C	0.114469	0.0192829	0.196213	2.91565e-09	11	61534772	8251	exposure	TRUE	0.00413309	34.2353
1-(1-enyl-palmitoyl)-2-arachidonoyl-gpc (p-16~0_20~4) levels	rs117110139	A	G	-0.242252	0.0411122	0.0341585	3.8046e-09	11	61789950	8251	exposure	TRUE	0.0038723	32.0668
1-(1-enyl-palmitoyl)-2-arachidonoyl-gpc (p-16~0_20~4) levels	rs61897792	T	C	0.147116	0.0257931	0.100373	1.17242e-08	11	61819414	8251	exposure	TRUE	0.00390867	32.3692
1-(1-enyl-palmitoyl)-2-arachidonoyl-gpc (p-16~0_20~4) levels	rs7115739	G	T	0.259968	0.0459803	0.971571	1.56853e-08	11	61874245	8251	exposure	TRUE	0.00373341	30.9123
1-(1-enyl-palmitoyl)-2-arachidonoyl-gpc (p-16~0_20~4) levels	rs10792328	C	G	0.0947705	0.0167913	0.311332	1.66108e-08	11	62086889	8251	exposure	TRUE	0.00385132	31.8924
1-(1-enyl-palmitoyl)-2-arachidonoyl-gpc (p-16~0_20~4) levels	rs17249111	G	A	0.173803	0.0314435	0.0636775	3.24895e-08	14	67482357	8251	exposure	TRUE	0.0036021	29.8212
1-(1-enyl-palmitoyl)-2-arachidonoyl-GPE (p-16~0_20~4) levels	rs3826884	A	G	-0.198196	0.0198045	0.182441	1.41057e-23	19	55226813	8262	exposure	TRUE	0.0117182	97.9401
1-(1-enyl-palmitoyl)-2-linoleoyl-GPC (p-16~0_18~2) levels	rs17231506	T	C	0.114121	0.0161324	0.325283	1.50516e-12	16	56960616	8260	exposure	TRUE	0.00571668	47.4798
1-(1-enyl-palmitoyl)-2-linoleoyl-GPC (p-16~0_18~2) levels	rs1260326	C	T	0.0866493	0.0154951	0.587611	2.244e-08	2	27508073	8260	exposure	TRUE	0.00363879	30.1589
1-(1-enyl-palmitoyl)-2-linoleoyl-GPC (p-16~0_18~2) levels	rs4665972	C	T	0.0852642	0.0155917	0.591604	4.53729e-08	2	27375230	8260	exposure	TRUE	0.00351298	29.1125
1-(1-enyl-palmitoyl)-2-linoleoyl-GPE (p-16~0_18~2) levels	rs174580	G	A	0.171168	0.0160437	0.350249	1.42392e-26	11	61839170	8254	exposure	TRUE	0.0133352	111.529
1-(1-enyl-palmitoyl)-2-linoleoyl-GPE (p-16~0_18~2) levels	rs3826884	A	G	-0.187589	0.0199148	0.182216	4.52868e-21	19	55226813	8254	exposure	TRUE	0.0104874	87.4597
1-(1-enyl-palmitoyl)-2-linoleoyl-GPE (p-16~0_18~2) levels	rs62126340	T	C	0.110487	0.0182894	0.230797	1.53136e-09	19	55217930	8254	exposure	TRUE	0.00433435	35.9227
1-(1-enyl-palmitoyl)-2-oleoyl-gpc (p-16~0_18~1) levels	rs102275	C	T	-0.119552	0.0157297	0.345934	2.95157e-14	11	61790331	8222	exposure	TRUE	0.00646783	53.5117
1-(1-enyl-palmitoyl)-2-oleoyl-gpc (p-16~0_18~1) levels	rs11508026	T	C	0.109624	0.0151925	0.431411	5.36851e-13	16	56965416	8222	exposure	TRUE	0.00589564	48.7496
1-(1-enyl-palmitoyl)-2-oleoyl-gpc (p-16~0_18~1) levels	rs1077989	C	A	-0.0972617	0.0150348	0.476164	9.85995e-11	14	67509105	8222	exposure	TRUE	0.00471917	38.9755
1-(1-enyl-palmitoyl)-2-oleoyl-gpc (p-16~0_18~1) levels	rs1260338	G	A	0.0941768	0.015211	0.433089	5.9642e-10	2	27402794	8222	exposure	TRUE	0.00435522	35.9565
1-(1-enyl-palmitoyl)-2-oleoyl-gpc (p-16~0_18~1) levels	rs1260326	C	T	0.0903535	0.0152682	0.586858	3.26357e-09	2	27508073	8222	exposure	TRUE	0.0039587	32.6698
1-(1-enyl-palmitoyl)-2-oleoyl-GPE (p-16~0_18~1) levels	rs3826886	A	G	-0.157905	0.0210476	0.160306	6.27056e-14	19	55229837	8264	exposure	TRUE	0.00671263	55.8345
1-(1-enyl-palmitoyl)-2-palmitoleoyl-GPC (P-16~0_16~1) levels	rs1077989	C	A	-0.329199	0.0145526	0.477125	2.67234e-113	14	67509105	8083	exposure	TRUE	0.0540726	461.939
1-(1-enyl-palmitoyl)-2-palmitoleoyl-GPC (P-16~0_16~1) levels	rs603424	A	G	-0.171435	0.019535	0.176266	1.69719e-18	10	100315722	8083	exposure	TRUE	0.00853463	69.562
1-(1-enyl-palmitoyl)-2-palmitoleoyl-GPC (P-16~0_16~1) levels	rs72721018	G	A	0.161865	0.0198915	0.180603	4.03918e-16	14	67526957	8083	exposure	TRUE	0.00775453	63.1541
1-(1-enyl-palmitoyl)-2-palmitoleoyl-GPC (P-16~0_16~1) levels	rs79191249	T	G	0.205934	0.0258638	0.0935673	1.68924e-15	14	67496212	8083	exposure	TRUE	0.00719359	58.5526
1-(1-enyl-palmitoyl)-2-palmitoleoyl-GPC (P-16~0_16~1) levels	rs17231506	T	C	0.124433	0.0158322	0.325087	3.8571e-15	16	56960616	8083	exposure	TRUE	0.00679436	55.2808
1-(1-enyl-palmitoyl)-2-palmitoleoyl-GPC (P-16~0_16~1) levels	rs76387177	C	G	0.216962	0.0301698	0.0652093	6.41373e-13	14	67501638	8083	exposure	TRUE	0.0057388	46.6429
1-(1-enyl-palmitoyl)-2-palmitoleoyl-GPC (P-16~0_16~1) levels	rs102275	C	T	-0.110206	0.015681	0.34613	2.09533e-12	11	61790331	8083	exposure	TRUE	0.00549757	44.6715
1-(1-enyl-palmitoyl)-2-palmitoleoyl-GPC (P-16~0_16~1) levels	rs116943761	A	C	-0.208682	0.0299285	0.0666167	3.10958e-12	14	67507335	8083	exposure	TRUE	0.00541556	44.0014
1-(1-enyl-palmitoyl)-2-palmitoleoyl-GPC (P-16~0_16~1) levels	rs146800521	G	A	-0.272882	0.0428009	0.0308304	1.82245e-10	14	68095151	8083	exposure	TRUE	0.00444999	36.1211
1-(1-enyl-palmitoyl)-2-palmitoleoyl-GPC (P-16~0_16~1) levels	rs1260326	C	T	0.0955316	0.0152093	0.586186	3.3614e-10	2	27508073	8083	exposure	TRUE	0.00442756	35.9383
1-(1-enyl-palmitoyl)-2-palmitoleoyl-GPC (P-16~0_16~1) levels	rs4665972	C	T	0.0934398	0.0153012	0.590682	1.01709e-09	2	27375230	8083	exposure	TRUE	0.0042219	34.2619
1-(1-enyl-palmitoyl)-2-palmitoleoyl-GPC (P-16~0_16~1) levels	rs112576474	A	G	-0.155634	0.025503	0.0971907	1.04356e-09	14	67555070	8083	exposure	TRUE	0.00425069	34.4965
1-(1-enyl-palmitoyl)-2-palmitoleoyl-GPC (P-16~0_16~1) levels	rs17104402	A	G	0.0967865	0.0160907	0.317339	1.79814e-09	14	67527666	8083	exposure	TRUE	0.00405871	32.9321
1-(1-enyl-palmitoyl)-2-palmitoleoyl-GPC (P-16~0_16~1) levels	rs74575714	C	T	-0.275785	0.0459983	0.0266972	2.02795e-09	14	67506230	8083	exposure	TRUE	0.00395262	32.0679
1-(1-enyl-palmitoyl)-2-palmitoleoyl-GPC (P-16~0_16~1) levels	rs112091683	T	C	-0.208938	0.0357726	0.0451393	5.19715e-09	14	67856149	8083	exposure	TRUE	0.00376322	30.5255
1-(1-enyl-palmitoyl)-2-palmitoleoyl-GPC (P-16~0_16~1) levels	rs72721029	G	A	-0.148027	0.0253512	0.0971308	5.24998e-09	14	67542085	8083	exposure	TRUE	0.00384321	31.1768
1-(1-enyl-palmitoyl)-2-palmitoleoyl-GPC (P-16~0_16~1) levels	rs141624256	A	G	-0.217732	0.0375203	0.0407771	6.51224e-09	14	67967796	8083	exposure	TRUE	0.0037086	30.0808
1-(1-enyl-palmitoyl)-2-palmitoleoyl-GPC (P-16~0_16~1) levels	rs12880237	G	A	0.091537	0.0159724	0.674032	9.98637e-09	14	68155101	8083	exposure	TRUE	0.00368196	29.8639
1-(1-enyl-palmitoyl)-2-palmitoleoyl-GPC (P-16~0_16~1) levels	rs174418	C	T	-0.0877125	0.0155764	0.595054	1.79038e-08	15	58395404	8083	exposure	TRUE	0.00370772	30.0736
1-(1-enyl-palmitoyl)-2-palmitoleoyl-GPC (P-16~0_16~1) levels	rs116987138	G	A	-0.221706	0.0398824	0.0359089	2.71316e-08	14	68238969	8083	exposure	TRUE	0.00340334	27.5963
1-(1-enyl-palmitoyl)-2-palmitoyl-GPC (P-16~0_16~0) levels	rs1077989	C	A	-0.356841	0.0149615	0.476476	9.99467e-126	14	67509105	8266	exposure	TRUE	0.0635268	560.599
1-(1-enyl-palmitoyl)-2-palmitoyl-GPC (P-16~0_16~0) levels	rs102275	C	T	-0.168221	0.0160894	0.345968	1.38434e-25	11	61790331	8266	exposure	TRUE	0.0128063	107.205
1-(1-enyl-palmitoyl)-2-palmitoyl-GPC (P-16~0_16~0) levels	rs72721018	G	A	0.1957	0.0204323	0.180763	9.89793e-22	14	67526957	8266	exposure	TRUE	0.0113431	94.8146
1-(1-enyl-palmitoyl)-2-palmitoyl-GPC (P-16~0_16~0) levels	rs12149545	A	G	0.144329	0.0164004	0.317989	1.36369e-18	16	56959249	8266	exposure	TRUE	0.00903526	75.3482
1-(1-enyl-palmitoyl)-2-palmitoyl-GPC (P-16~0_16~0) levels	rs76387177	C	G	0.270982	0.0309729	0.0654596	2.15248e-18	14	67501638	8266	exposure	TRUE	0.00898426	74.919
1-(1-enyl-palmitoyl)-2-palmitoyl-GPC (P-16~0_16~0) levels	rs116943761	A	C	-0.247927	0.0308067	0.0663733	8.42925e-16	14	67507335	8266	exposure	TRUE	0.00761806	63.4389
1-(1-enyl-palmitoyl)-2-palmitoyl-GPC (P-16~0_16~0) levels	rs79191249	T	G	0.203951	0.0266534	0.0935865	1.9793e-14	14	67496212	8266	exposure	TRUE	0.00705702	58.7337
1-(1-enyl-palmitoyl)-2-palmitoyl-GPC (P-16~0_16~0) levels	rs10139749	C	T	-0.119307	0.0165633	0.313204	5.88567e-13	14	67567525	8266	exposure	TRUE	0.00612374	50.9184
1-(1-enyl-palmitoyl)-2-palmitoyl-GPC (P-16~0_16~0) levels	rs174418	C	T	-0.108969	0.01603	0.594647	1.062e-11	15	58395404	8266	exposure	TRUE	0.00572438	47.5786
1-(1-enyl-palmitoyl)-2-palmitoyl-GPC (P-16~0_16~0) levels	rs12880237	G	A	0.108792	0.0164294	0.674197	3.54879e-11	14	68155101	8266	exposure	TRUE	0.00519955	43.1937
1-(1-enyl-palmitoyl)-2-palmitoyl-GPC (P-16~0_16~0) levels	rs17104402	A	G	0.107403	0.016566	0.318182	8.9725e-11	14	67527666	8266	exposure	TRUE	0.00500503	41.5696
1-(1-enyl-palmitoyl)-2-palmitoyl-GPC (P-16~0_16~0) levels	rs146800521	G	A	-0.280642	0.044077	0.0308777	1.92648e-10	14	68095151	8266	exposure	TRUE	0.00471367	39.1382
1-(1-enyl-palmitoyl)-2-palmitoyl-GPC (P-16~0_16~0) levels	rs141624256	A	G	-0.243943	0.0386487	0.0407816	2.75773e-10	14	67967796	8266	exposure	TRUE	0.00465574	38.655
1-(1-enyl-palmitoyl)-2-palmitoyl-GPC (P-16~0_16~0) levels	rs4902490	G	A	0.0999408	0.01593	0.612264	3.52448e-10	14	67575538	8266	exposure	TRUE	0.00474232	39.3772
1-(1-enyl-palmitoyl)-2-palmitoyl-GPC (P-16~0_16~0) levels	rs112091683	T	C	-0.22896	0.0368662	0.0451078	5.27911e-10	14	67856149	8266	exposure	TRUE	0.00451601	37.4896
1-(1-enyl-palmitoyl)-2-palmitoyl-GPC (P-16~0_16~0) levels	rs174465	T	C	0.100953	0.0167036	0.682919	1.50531e-09	11	61891328	8266	exposure	TRUE	0.00441375	36.6369
1-(1-enyl-palmitoyl)-2-palmitoyl-GPC (P-16~0_16~0) levels	rs112576474	A	G	-0.153228	0.0263319	0.0966014	5.91681e-09	14	67555070	8266	exposure	TRUE	0.00409797	34.005
1-(1-enyl-palmitoyl)-2-palmitoyl-GPC (P-16~0_16~0) levels	rs289714	A	G	0.120788	0.021096	0.826352	1.03046e-08	16	56973539	8266	exposure	TRUE	0.00418709	34.7476
1-(1-enyl-palmitoyl)-2-palmitoyl-GPC (P-16~0_16~0) levels	rs1260338	G	A	0.0890243	0.0156137	0.43369	1.18635e-08	2	27402794	8266	exposure	TRUE	0.00389297	32.2972
1-(1-enyl-palmitoyl)-2-palmitoyl-GPC (P-16~0_16~0) levels	rs74575714	C	T	-0.269629	0.0473935	0.0267111	1.27673e-08	14	67506230	8266	exposure	TRUE	0.00378004	31.3568
1-(1-enyl-palmitoyl)-2-palmitoyl-GPC (P-16~0_16~0) levels	rs12544703	G	A	-0.113683	0.0200929	0.183276	1.53274e-08	8	58397865	8266	exposure	TRUE	0.00386903	32.0978
1-(1-enyl-palmitoyl)-2-palmitoyl-GPC (P-16~0_16~0) levels	rs2070895	A	G	0.106229	0.0188428	0.21591	1.72386e-08	15	58431740	8266	exposure	TRUE	0.0038208	31.6962
1-(1-enyl-palmitoyl)-2-palmitoyl-GPC (P-16~0_16~0) levels	rs1260326	C	T	0.0878758	0.0156743	0.587547	2.06611e-08	2	27508073	8266	exposure	TRUE	0.00374271	31.0459
1-(1-enyl-palmitoyl)-2-palmitoyl-GPC (P-16~0_16~0) levels	rs10135320	C	T	-0.0933366	0.016706	0.304263	2.31023e-08	14	67968109	8266	exposure	TRUE	0.00368832	30.5931
1-(1-enyl-palmitoyl)-GPC (p-16~0) levels	rs174560	C	T	-0.172408	0.0166804	0.307267	4.84653e-25	11	61814292	8170	exposure	TRUE	0.012654	104.682
1-(1-enyl-palmitoyl)-GPC (p-16~0) levels	rs61781291	A	T	0.133324	0.0178647	0.253023	8.4588e-14	1	39936166	8170	exposure	TRUE	0.00671914	55.2532
1-(1-enyl-palmitoyl)-GPC (p-16~0) levels	rs1077989	C	A	-0.099282	0.0155086	0.477068	1.53635e-10	14	67509105	8170	exposure	TRUE	0.00491809	40.3695
1-(1-enyl-palmitoyl)-GPC (p-16~0) levels	rs2050172	C	T	0.116254	0.0184065	0.224148	2.68576e-10	1	39835420	8170	exposure	TRUE	0.00470067	38.5764
1-(1-enyl-palmitoyl)-GPE (p-16~0) levels	rs2996024	C	T	-0.0960628	0.0171129	0.282964	1.98325e-08	17	13441912	8227	exposure	TRUE	0.00374466	30.9156
1-(1-enyl-palmitoyl)-GPE (p-16~0) levels	rs3826884	A	G	-0.110688	0.0201191	0.182754	3.76242e-08	19	55226813	8227	exposure	TRUE	0.00365974	30.212
1-(1-enyl-palmitoyl)-GPE (p-16~0) levels	rs77692382	T	C	0.0982977	0.0179868	0.249263	4.62922e-08	1	39941043	8227	exposure	TRUE	0.00361628	29.8519
1-(1-enyl-stearoyl)-2-arachidonoyl-GPE (p-18~0_20~4) levels	rs102275	C	T	-0.288805	0.0158284	0.345258	2.22611e-74	11	61790331	8254	exposure	TRUE	0.0377097	323.375
1-(1-enyl-stearoyl)-2-arachidonoyl-GPE (p-18~0_20~4) levels	rs174465	T	C	0.176714	0.0165731	0.683814	1.52078e-26	11	61891328	8254	exposure	TRUE	0.0135037	112.958
1-(1-enyl-stearoyl)-2-arachidonoyl-GPE (p-18~0_20~4) levels	rs198476	A	G	0.117961	0.0152671	0.498418	1.10567e-14	11	61758258	8254	exposure	TRUE	0.00695733	57.8141
1-(1-enyl-stearoyl)-2-arachidonoyl-GPE (p-18~0_20~4) levels	rs7118175	T	C	0.19621	0.0284934	0.921491	5.73195e-12	11	61871886	8254	exposure	TRUE	0.00557035	46.224
1-(1-enyl-stearoyl)-2-arachidonoyl-GPE (p-18~0_20~4) levels	rs174481	G	C	0.12672	0.0194544	0.203586	7.33221e-11	11	61948923	8254	exposure	TRUE	0.00520723	43.195
1-(1-enyl-stearoyl)-2-arachidonoyl-GPE (p-18~0_20~4) levels	rs916925	A	G	-0.235848	0.0362634	0.046801	7.83447e-11	11	61851822	8254	exposure	TRUE	0.00496287	41.1579
1-(1-enyl-stearoyl)-2-arachidonoyl-GPE (p-18~0_20~4) levels	rs1692120	A	G	0.093482	0.0153272	0.471248	1.06666e-09	11	61650000	8254	exposure	TRUE	0.00435499	36.0946
1-(1-enyl-stearoyl)-2-arachidonoyl-GPE (p-18~0_20~4) levels	rs3758977	G	T	-0.0959473	0.0161214	0.345058	2.65647e-09	11	61969772	8254	exposure	TRUE	0.00416093	34.4795
1-(1-enyl-stearoyl)-2-arachidonoyl-GPE (p-18~0_20~4) levels	rs972354	T	C	-0.147455	0.0250644	0.101251	4.0276e-09	11	61950135	8254	exposure	TRUE	0.00395719	32.7845
1-(1-enyl-stearoyl)-2-arachidonoyl-GPE (p-18~0_20~4) levels	rs139957766	A	G	-0.268304	0.0486945	0.0253459	3.58958e-08	11	61839575	8254	exposure	TRUE	0.00355666	29.4543
1-(1-enyl-stearoyl)-2-arachidonoyl-GPE (p-18~0_20~4) levels	rs7412	T	C	0.152027	0.0276425	0.0836769	3.80278e-08	19	44908822	8254	exposure	TRUE	0.00354426	29.3513
1-(1-enyl-stearoyl)-2-arachidonoyl-GPE (p-18~0_20~4) levels	rs3826886	A	G	-0.115275	0.0210141	0.160522	4.12132e-08	19	55229837	8254	exposure	TRUE	0.00358133	29.6593
1-(1-enyl-stearoyl)-2-linoleoyl-GPE (p-18~0_18~2) levels	rs174570	T	C	0.236014	0.0222227	0.130983	2.39529e-26	11	61829740	8261	exposure	TRUE	0.0126809	106.076
1-(1-enyl-stearoyl)-2-linoleoyl-GPE (p-18~0_18~2) levels	rs7412	T	C	0.218185	0.0275265	0.0836665	2.25637e-15	19	44908822	8261	exposure	TRUE	0.00729936	60.7287
1-(1-enyl-stearoyl)-2-linoleoyl-GPE (p-18~0_18~2) levels	rs3826884	A	G	-0.117239	0.0198652	0.182364	3.59768e-09	19	55226813	8261	exposure	TRUE	0.00409896	33.9926
1-(1-enyl-stearoyl)-2-linoleoyl-GPE (p-18~0_18~2) levels	rs174619	G	A	-0.087205	0.0153991	0.53335	1.48744e-08	11	61862194	8261	exposure	TRUE	0.00378544	31.3827
1-(1-enyl-stearoyl)-2-oleoyl-GPE (p-18~0_18~1) levels	rs141622900	A	G	0.240812	0.0329902	0.0583313	2.88805e-13	19	44923535	8258	exposure	TRUE	0.00637068	52.9336
1-(1-enyl-stearoyl)-GPE (p-18~0) levels	rs174560	C	T	-0.124804	0.0167125	0.307781	8.16011e-14	11	61814292	8249	exposure	TRUE	0.00663701	55.1011
1-(1-enyl-stearoyl)-GPE (p-18~0) levels	rs77692382	T	C	0.129581	0.0179402	0.249388	5.0872e-13	1	39941043	8249	exposure	TRUE	0.00628642	52.1721
1-(1-enyl-stearoyl)-GPE (p-18~0) levels	rs2050172	C	T	0.119323	0.0183764	0.224366	8.39924e-11	1	39835420	8249	exposure	TRUE	0.00495555	41.072
1-arachidonoyl-gpc (20~4n6) levels	rs102275	C	T	-0.562555	0.0149199	0.345078	1e-200	11	61790331	8267	exposure	TRUE	0.143043	1379.59
1-arachidonoyl-gpc (20~4n6) levels	rs174465	T	C	0.328981	0.0162853	0.683478	9.57877e-91	11	61891328	8267	exposure	TRUE	0.0468274	406.042
1-arachidonoyl-gpc (20~4n6) levels	rs7118175	T	C	0.369788	0.0282786	0.921555	4.4793e-39	11	61871886	8267	exposure	TRUE	0.0197707	166.701
1-arachidonoyl-gpc (20~4n6) levels	rs916924	C	T	-0.425125	0.0351566	0.0494299	1.15953e-33	11	61851709	8267	exposure	TRUE	0.0169839	142.797
1-arachidonoyl-gpc (20~4n6) levels	rs198476	A	G	0.180576	0.0151891	0.497935	1.35819e-32	11	61758258	8267	exposure	TRUE	0.0163036	136.982
1-arachidonoyl-gpc (20~4n6) levels	rs139957766	A	G	-0.535875	0.0483819	0.0253698	1.64165e-28	11	61839575	8267	exposure	TRUE	0.0142008	119.061
1-arachidonoyl-gpc (20~4n6) levels	rs174467	G	T	0.23548	0.0217184	0.151178	2.16696e-27	11	61895189	8267	exposure	TRUE	0.0142313	119.319
1-arachidonoyl-gpc (20~4n6) levels	rs2727261	C	T	0.239937	0.0246578	0.895435	2.23111e-22	11	61944659	8267	exposure	TRUE	0.0107806	90.0731
1-arachidonoyl-gpc (20~4n6) levels	rs3758977	G	T	-0.152434	0.0160654	0.345303	2.34824e-21	11	61969772	8267	exposure	TRUE	0.0105059	87.7534
1-arachidonoyl-gpc (20~4n6) levels	rs56188017	C	G	0.186403	0.0197317	0.198723	3.4912e-21	11	61555360	8267	exposure	TRUE	0.0110654	92.4787
1-arachidonoyl-gpc (20~4n6) levels	rs117983270	C	T	-0.368124	0.0391753	0.03821	5.62295e-21	11	61844238	8267	exposure	TRUE	0.00996037	83.1507
1-arachidonoyl-gpc (20~4n6) levels	rs2736604	A	C	-0.28173	0.0300598	0.06875	7.09584e-21	11	61932355	8267	exposure	TRUE	0.0101633	84.8622
1-arachidonoyl-gpc (20~4n6) levels	rs740006	C	T	0.239464	0.025655	0.098681	1.01956e-20	11	61790396	8267	exposure	TRUE	0.0102005	85.1762
1-arachidonoyl-gpc (20~4n6) levels	rs174569	C	T	-0.485985	0.0575007	0.0177619	2.86811e-17	11	61826692	8267	exposure	TRUE	0.00824104	68.6782
1-arachidonoyl-gpc (20~4n6) levels	rs11600827	C	G	-0.129549	0.0153593	0.525397	3.32498e-17	11	61655449	8267	exposure	TRUE	0.00836982	69.7605
1-arachidonoyl-gpc (20~4n6) levels	rs116962591	T	C	-0.390407	0.0500156	0.0236993	5.91719e-15	11	61894976	8267	exposure	TRUE	0.00705317	58.7085
1-arachidonoyl-gpc (20~4n6) levels	rs2028061	T	C	-0.351063	0.0475748	0.0261977	1.59259e-13	11	61978371	8267	exposure	TRUE	0.00628831	52.3018
1-arachidonoyl-gpc (20~4n6) levels	rs76376981	C	G	-0.272148	0.037131	0.0443323	2.31161e-13	11	61651344	8267	exposure	TRUE	0.00627578	52.1969
1-arachidonoyl-gpc (20~4n6) levels	rs4500751	T	C	-0.119795	0.0164555	0.310531	3.34003e-13	16	15046354	8267	exposure	TRUE	0.00614507	51.1031
1-arachidonoyl-gpc (20~4n6) levels	rs10792328	C	G	0.120018	0.0167861	0.311365	8.68779e-13	11	62086889	8267	exposure	TRUE	0.00617706	51.3707
1-arachidonoyl-gpc (20~4n6) levels	rs61897792	T	C	0.175039	0.0257877	0.100372	1.13955e-11	11	61819414	8267	exposure	TRUE	0.00553318	45.9862
1-arachidonoyl-gpc (20~4n6) levels	rs80349011	A	G	-0.276008	0.0412594	0.0338633	2.23829e-11	11	61839985	8267	exposure	TRUE	0.00498472	41.4051
1-arachidonoyl-gpc (20~4n6) levels	rs7115739	G	T	0.298689	0.0457793	0.971262	6.82023e-11	11	61874245	8267	exposure	TRUE	0.00498037	41.3688
1-arachidonoyl-gpc (20~4n6) levels	rs482548	T	C	0.153841	0.0254294	0.100596	1.45093e-09	11	61865710	8267	exposure	TRUE	0.00428262	35.5481
1-arachidonoyl-gpc (20~4n6) levels	rs2954021	G	A	-0.0891919	0.0153807	0.509683	6.6734e-09	8	125469835	8267	exposure	TRUE	0.00397611	32.9937
1-arachidonoyl-gpc (20~4n6) levels	rs1219550	C	T	-0.117372	0.0206163	0.162727	1.24723e-08	11	75742832	8267	exposure	TRUE	0.00375393	31.1431
1-arachidonoyl-gpc (20~4n6) levels	rs58542926	T	C	-0.15957	0.0292592	0.0754694	4.93401e-08	19	19268740	8267	exposure	TRUE	0.00355324	29.4723
1-arachidonoyl-GPE (20~4n6) levels	rs174560	C	T	-0.384949	0.0161464	0.307301	1.25235e-125	11	61814292	8270	exposure	TRUE	0.0630877	556.732
1-arachidonoyl-GPE (20~4n6) levels	rs11519272	A	C	0.271602	0.0203388	0.166081	1.12462e-40	12	21209458	8270	exposure	TRUE	0.0204334	172.467
1-arachidonoyl-GPE (20~4n6) levels	rs11045856	G	T	-0.196649	0.0176239	0.240287	6.53602e-29	12	21197755	8270	exposure	TRUE	0.0141187	118.405
1-arachidonoyl-GPE (20~4n6) levels	rs174602	C	T	-0.190662	0.0197453	0.195382	4.63405e-22	11	61856942	8270	exposure	TRUE	0.0114296	95.5929
1-arachidonoyl-GPE (20~4n6) levels	rs7118175	T	C	0.245684	0.0285197	0.921348	7.0231e-18	11	61871886	8270	exposure	TRUE	0.00874817	72.9682
1-arachidonoyl-GPE (20~4n6) levels	rs198476	A	G	0.116025	0.0153236	0.497875	3.68451e-14	11	61758258	8270	exposure	TRUE	0.00673078	56.0272
1-arachidonoyl-GPE (20~4n6) levels	rs174481	G	C	0.146113	0.0194998	0.203478	6.73081e-14	11	61948923	8270	exposure	TRUE	0.00692027	57.6155
1-arachidonoyl-GPE (20~4n6) levels	rs412334	T	C	0.156154	0.0210051	0.157087	1.05296e-13	11	61792789	8270	exposure	TRUE	0.00645742	53.737
1-arachidonoyl-GPE (20~4n6) levels	rs2727260	T	C	0.179216	0.0246455	0.893551	3.54793e-13	11	61944770	8270	exposure	TRUE	0.00611005	50.8284
1-arachidonoyl-GPE (20~4n6) levels	rs2028062	A	G	-0.114375	0.016225	0.342869	1.79821e-12	11	61978481	8270	exposure	TRUE	0.00589484	49.0276
1-arachidonoyl-GPE (20~4n6) levels	rs139957766	A	G	-0.341051	0.0486249	0.0255408	2.31719e-12	11	61839575	8270	exposure	TRUE	0.00578984	48.1492
1-arachidonoyl-GPE (20~4n6) levels	rs11230741	A	G	0.13398	0.0200253	0.194096	2.22332e-11	11	61583635	8270	exposure	TRUE	0.00561578	46.6935
1-arachidonoyl-GPE (20~4n6) levels	rs1532085	G	A	-0.104314	0.0159064	0.623395	5.45555e-11	15	58391167	8270	exposure	TRUE	0.00510934	42.4609
1-arachidonoyl-GPE (20~4n6) levels	rs740006	C	T	0.168506	0.0258538	0.0987061	7.14157e-11	11	61790396	8270	exposure	TRUE	0.00505209	41.9828
1-arachidonoyl-GPE (20~4n6) levels	rs12825751	G	A	-0.140202	0.0217823	0.147927	1.22253e-10	12	20833517	8270	exposure	TRUE	0.00495522	41.1738
1-arachidonoyl-GPE (20~4n6) levels	rs146751662	T	C	0.272958	0.0435505	0.0324572	3.66578e-10	12	21315695	8270	exposure	TRUE	0.00467954	38.8723
1-arachidonoyl-GPE (20~4n6) levels	rs7942717	A	G	0.175813	0.0282141	0.91998	4.62273e-10	11	61879816	8270	exposure	TRUE	0.00455102	37.7999
1-arachidonoyl-GPE (20~4n6) levels	rs11045655	G	A	-0.119248	0.0191644	0.201853	4.89744e-10	12	21018282	8270	exposure	TRUE	0.00458195	38.0579
1-arachidonoyl-GPE (20~4n6) levels	rs79519287	G	A	-0.205259	0.0342933	0.0545241	2.15871e-09	11	61764338	8270	exposure	TRUE	0.00434384	36.0715
1-arachidonoyl-GPE (20~4n6) levels	rs148589589	T	C	0.304784	0.0512381	0.0231003	2.70794e-09	12	21106213	8270	exposure	TRUE	0.00419259	34.8102
1-arachidonoyl-GPE (20~4n6) levels	rs11615107	T	C	-0.179264	0.0306909	0.0671243	5.19057e-09	12	21237903	8270	exposure	TRUE	0.00402457	33.4096
1-arachidonoyl-GPE (20~4n6) levels	rs2524292	G	T	-0.176573	0.0304002	0.0682619	6.31209e-09	11	61927674	8270	exposure	TRUE	0.00396598	32.9213
1-arachidonoyl-GPE (20~4n6) levels	rs10897209	G	A	0.27168	0.0468551	0.971523	6.69879e-09	11	62036068	8270	exposure	TRUE	0.00408407	33.9055
1-arachidonoyl-GPE (20~4n6) levels	rs11045972	T	C	-0.13063	0.022537	0.131329	6.78068e-09	12	21321373	8270	exposure	TRUE	0.00389342	32.3167
1-arachidonoyl-GPE (20~4n6) levels	rs183068529	G	T	-0.280848	0.0510027	0.0233066	3.65947e-08	12	20996858	8270	exposure	TRUE	0.00359095	29.797
1-arachidonoyl-GPE (20~4n6) levels	rs261342	C	G	-0.103625	0.018854	0.782679	3.88127e-08	15	58438954	8270	exposure	TRUE	0.00365296	30.3134
1-arachidonoyl-GPE (20~4n6) levels	rs4149127	G	A	-0.165735	0.0303431	0.931965	4.707e-08	12	20864354	8270	exposure	TRUE	0.0034833	28.9006
1-arachidonylglycerol (20~4) levels	rs174564	G	A	-0.270612	0.0160231	0.337395	5.43349e-64	11	61820833	7650	exposure	TRUE	0.0327429	258.895
1-arachidonylglycerol (20~4) levels	rs198476	A	G	0.115732	0.0152922	0.498885	3.78753e-14	11	61758258	7650	exposure	TRUE	0.00669691	51.5633
1-arachidonylglycerol (20~4) levels	rs7118175	T	C	0.214601	0.0287663	0.922893	8.64142e-14	11	61871886	7650	exposure	TRUE	0.00655449	50.4594
1-arachidonylglycerol (20~4) levels	rs1109748	A	C	-0.188429	0.0295552	0.0720455	1.82398e-10	11	61955173	7650	exposure	TRUE	0.00474743	36.4816
1-arachidonylglycerol (20~4) levels	rs916924	C	T	-0.224634	0.0356352	0.049089	2.90605e-10	11	61851709	7650	exposure	TRUE	0.00471091	36.1996
1-arachidonylglycerol (20~4) levels	rs139957766	A	G	-0.302181	0.049267	0.0248943	8.59449e-10	11	61839575	7650	exposure	TRUE	0.00443319	34.056
1-arachidonylglycerol (20~4) levels	rs174467	G	T	0.124008	0.0218283	0.15243	1.33856e-08	11	61895189	7650	exposure	TRUE	0.00397352	30.5107
1-arachidonylglycerol (20~4) levels	rs56188017	C	G	0.111423	0.0197965	0.200697	1.81846e-08	11	61555360	7650	exposure	TRUE	0.0039832	30.5853
1-arachidonylglycerol (20~4) levels	rs11215670	T	C	0.221077	0.0402002	0.0372577	3.81076e-08	11	115733516	7650	exposure	TRUE	0.00350625	26.9102
1-dihomo-linolenylglycerol (20~3) levels	rs1895342	A	G	0.139195	0.0253968	0.127071	4.2332e-08	5	157599344	6470	exposure	TRUE	0.00429836	27.9218
1-lignoceroyl-GPC (24~0) levels	rs174560	C	T	-0.135833	0.0166808	0.308773	3.85389e-16	11	61814292	8208	exposure	TRUE	0.00787591	65.1428
1-linolenoyl-GPC (18~3) levels	rs6689014	T	C	0.480254	0.08086	0.00884527	2.86191e-09	1	25863026	8261	exposure	TRUE	0.00404412	33.536
1-linolenoyl-GPC (18~3) levels	rs7515857	T	G	0.104128	0.0176897	0.251707	3.94744e-09	1	39952958	8261	exposure	TRUE	0.00408444	33.8717
1-linolenoyl-GPC (18~3) levels	rs2272720	T	G	-0.0871757	0.0155057	0.414613	1.88588e-08	8	2073341	8261	exposure	TRUE	0.00368898	30.5801
1-linoleoyl-2-arachidonoyl-GPC (18~2_20~4n6) levels	rs174560	C	T	-0.314042	0.0160757	0.305884	5.51808e-85	11	61814292	8063	exposure	TRUE	0.0418788	352.341
1-linoleoyl-2-arachidonoyl-GPC (18~2_20~4n6) levels	rs58542926	T	C	-0.268266	0.0287406	0.0758912	1.01915e-20	19	19268740	8063	exposure	TRUE	0.0100943	82.1998
1-linoleoyl-2-arachidonoyl-GPC (18~2_20~4n6) levels	rs73002956	G	A	-0.23168	0.0277376	0.0824415	6.68092e-17	19	19467934	8063	exposure	TRUE	0.00812057	65.9959
1-linoleoyl-2-arachidonoyl-GPC (18~2_20~4n6) levels	rs7118175	T	C	0.229881	0.0280901	0.921382	2.75291e-16	11	61871886	8063	exposure	TRUE	0.00765593	62.1906
1-linoleoyl-2-arachidonoyl-GPC (18~2_20~4n6) levels	rs73004962	T	A	-0.215636	0.0279758	0.0804326	1.27843e-14	19	19602260	8063	exposure	TRUE	0.00687841	55.8309
1-linoleoyl-2-arachidonoyl-GPC (18~2_20~4n6) levels	rs412334	T	C	0.148367	0.0206646	0.15763	6.98311e-13	11	61792789	8063	exposure	TRUE	0.00584583	47.4004
1-linoleoyl-2-arachidonoyl-GPC (18~2_20~4n6) levels	rs198476	A	G	0.108288	0.0151026	0.498693	7.49199e-13	11	61758258	8063	exposure	TRUE	0.00586311	47.5412
1-linoleoyl-2-arachidonoyl-GPC (18~2_20~4n6) levels	rs2521569	A	G	-0.20802	0.0299936	0.0678736	4.04834e-12	11	61933946	8063	exposure	TRUE	0.0054754	44.3802
1-linoleoyl-2-arachidonoyl-GPC (18~2_20~4n6) levels	rs174472	G	A	-0.106875	0.0154999	0.428287	5.37739e-12	11	61904484	8063	exposure	TRUE	0.00559365	45.344
1-linoleoyl-2-arachidonoyl-GPC (18~2_20~4n6) levels	rs56188017	C	G	0.129041	0.0195611	0.19877	4.20018e-11	11	61555360	8063	exposure	TRUE	0.00530388	42.9825
1-linoleoyl-2-arachidonoyl-GPC (18~2_20~4n6) levels	rs2727261	C	T	0.157236	0.0245004	0.895518	1.38356e-10	11	61944659	8063	exposure	TRUE	0.00462647	37.4673
1-linoleoyl-2-arachidonoyl-GPC (18~2_20~4n6) levels	rs174602	C	T	-0.122771	0.0195573	0.19368	3.4401e-10	11	61856942	8063	exposure	TRUE	0.00470775	38.1287
1-linoleoyl-2-arachidonoyl-GPC (18~2_20~4n6) levels	rs143729015	A	G	-0.232104	0.0371432	0.0434376	4.13391e-10	19	19019941	8063	exposure	TRUE	0.00447687	36.2503
1-linoleoyl-2-arachidonoyl-GPC (18~2_20~4n6) levels	rs4932474	T	C	-0.0986494	0.0158029	0.39142	4.3062e-10	15	89127273	8063	exposure	TRUE	0.00463639	37.548
1-linoleoyl-2-arachidonoyl-GPC (18~2_20~4n6) levels	rs111676697	T	G	0.111781	0.0179331	0.228787	4.56847e-10	6	11089296	8063	exposure	TRUE	0.00440932	35.7009
1-linoleoyl-2-arachidonoyl-GPC (18~2_20~4n6) levels	rs117983270	C	T	-0.236044	0.0388007	0.0382466	1.17584e-09	11	61844238	8063	exposure	TRUE	0.00409895	33.1776
1-linoleoyl-2-arachidonoyl-GPC (18~2_20~4n6) levels	rs28601761	G	C	-0.0928799	0.0152936	0.423106	1.25449e-09	8	125487789	8063	exposure	TRUE	0.00421132	34.0911
1-linoleoyl-2-arachidonoyl-GPC (18~2_20~4n6) levels	rs17231506	T	C	0.0968277	0.0160793	0.325729	1.7238e-09	16	56960616	8063	exposure	TRUE	0.00411832	33.3351
1-linoleoyl-2-arachidonoyl-GPC (18~2_20~4n6) levels	rs17606561	A	G	0.0994156	0.0177403	0.234976	2.09547e-08	6	10982126	8063	exposure	TRUE	0.00355335	28.7457
1-linoleoyl-2-arachidonoyl-GPC (18~2_20~4n6) levels	rs2028062	A	G	-0.0892498	0.0159599	0.342243	2.24304e-08	11	61978481	8063	exposure	TRUE	0.00358628	29.0131
1-linoleoyl-2-linolenoyl-GPC (18~2_18~3) levels	rs174546	T	C	0.236846	0.0157327	0.340301	3.2306e-51	11	61802358	8188	exposure	TRUE	0.0251867	211.505
1-linoleoyl-2-linolenoyl-GPC (18~2_18~3) levels	rs113003506	T	C	0.139577	0.0236809	0.113181	3.76742e-09	11	61861905	8188	exposure	TRUE	0.00391081	32.1395
1-linoleoyl-2-linolenoyl-GPC (18~2_18~3) levels	rs174471	T	C	-0.0869163	0.0152444	0.412524	1.18742e-08	11	61902565	8188	exposure	TRUE	0.00366161	30.0841
1-linoleoyl-gpc (18~2) levels	rs77692382	T	C	0.148269	0.0176834	0.248839	5.0881e-17	1	39941043	8262	exposure	TRUE	0.0082183	68.4457
1-linoleoyl-gpc (18~2) levels	rs174546	T	C	0.128831	0.0160407	0.33937	9.6294e-16	11	61802358	8262	exposure	TRUE	0.00744222	61.9337
1-linoleoyl-gpc (18~2) levels	rs17504495	C	T	0.116033	0.0181196	0.223864	1.51652e-10	1	39833523	8262	exposure	TRUE	0.00467859	38.8268
1-linoleoyl-GPE (18~2) levels	rs174546	T	C	0.28307	0.0159736	0.339458	2.88399e-70	11	61802358	8279	exposure	TRUE	0.0359339	308.511
1-linoleoyl-GPE (18~2) levels	rs77692382	T	C	0.128077	0.0178513	0.249177	7.25006e-13	1	39941043	8279	exposure	TRUE	0.00613787	51.1169
1-linoleoyl-GPE (18~2) levels	rs198465	A	G	-0.108837	0.0153206	0.491191	1.21218e-12	11	61753846	8279	exposure	TRUE	0.00592091	49.2993
1-linoleoyl-GPE (18~2) levels	rs113003506	T	C	0.164292	0.0241493	0.112901	1.02345e-11	11	61861905	8279	exposure	TRUE	0.00540671	44.9946
1-linoleoyl-GPE (18~2) levels	rs174471	T	C	-0.104421	0.0155227	0.413125	1.73219e-11	11	61902565	8279	exposure	TRUE	0.00528729	43.9955
1-linoleoyl-GPE (18~2) levels	rs73069021	A	G	0.132622	0.0206069	0.164627	1.22829e-10	12	21247021	8279	exposure	TRUE	0.00483774	40.2366
1-linoleoyl-GPE (18~2) levels	rs562172	T	C	-0.145854	0.0255123	0.100935	1.08414e-08	11	61858695	8279	exposure	TRUE	0.003861	32.0813
1-linoleoyl-GPE (18~2) levels	rs17504495	C	T	0.0999456	0.0182844	0.224432	4.59851e-08	1	39833523	8279	exposure	TRUE	0.00347746	28.8834
1-linoleoyl-GPG (18~2) levels	rs4149056	C	T	0.434263	0.0206869	0.157375	7.73876e-98	12	21178615	8115	exposure	TRUE	0.0500156	427.14
1-linoleoyl-GPG (18~2) levels	rs4149000	T	C	0.349219	0.0226105	0.134055	8.1553e-54	12	21295063	8115	exposure	TRUE	0.0283139	236.404
1-linoleoyl-GPG (18~2) levels	rs11045856	G	T	-0.266288	0.0177383	0.238461	6.12048e-51	12	21197755	8115	exposure	TRUE	0.0257539	214.465
1-linoleoyl-GPG (18~2) levels	rs11045961	A	G	-0.213938	0.0226795	0.131766	3.98231e-21	12	21307669	8115	exposure	TRUE	0.0104724	85.8617
1-linoleoyl-GPG (18~2) levels	rs4149127	G	A	-0.26302	0.0304125	0.931169	5.22248e-18	12	20864354	8115	exposure	TRUE	0.00886789	72.5889
1-linoleoyl-GPG (18~2) levels	rs7296267	C	T	0.272615	0.0320567	0.0612536	1.82937e-17	12	21015278	8115	exposure	TRUE	0.00854692	69.9389
1-linoleoyl-GPG (18~2) levels	rs1910169	A	G	-0.164219	0.0197734	0.185155	9.97883e-17	12	21053827	8115	exposure	TRUE	0.00813743	66.5606
1-linoleoyl-GPG (18~2) levels	rs2857468	T	A	0.190726	0.0231351	0.871758	1.66557e-16	12	21339003	8115	exposure	TRUE	0.00813347	66.528
1-linoleoyl-GPG (18~2) levels	rs113092518	A	G	0.381289	0.0521934	0.0223391	2.76653e-13	12	21149302	8115	exposure	TRUE	0.00635027	51.849
1-linoleoyl-GPG (18~2) levels	rs141494193	C	T	0.371984	0.0511913	0.0236147	3.68778e-13	12	21083847	8115	exposure	TRUE	0.0063809	52.1007
1-linoleoyl-GPG (18~2) levels	rs76151543	G	A	0.372389	0.0518016	0.0226627	6.53877e-13	12	21026329	8115	exposure	TRUE	0.00614299	50.1461
1-linoleoyl-GPG (18~2) levels	rs144087803	A	G	0.380183	0.0546244	0.0208178	3.40402e-12	12	20904011	8115	exposure	TRUE	0.00589269	48.0908
1-linoleoyl-GPG (18~2) levels	rs117413714	A	G	0.338836	0.0500251	0.024321	1.25856e-11	12	21361739	8115	exposure	TRUE	0.00544876	44.448
1-linoleoyl-GPG (18~2) levels	rs7310629	T	C	-0.146718	0.0220621	0.147198	2.92588e-11	12	20832353	8115	exposure	TRUE	0.00540439	44.0841
1-linoleoyl-GPG (18~2) levels	rs117428564	T	C	0.384631	0.0579765	0.0180012	3.26149e-11	12	20960665	8115	exposure	TRUE	0.00523035	42.657
1-linoleoyl-GPG (18~2) levels	rs11615107	T	C	-0.193379	0.0310934	0.066679	4.99369e-10	12	21237903	8115	exposure	TRUE	0.00465445	37.9382
1-linoleoyl-GPG (18~2) levels	rs139857019	C	G	0.324759	0.0533325	0.0219304	1.13391e-09	12	20872854	8115	exposure	TRUE	0.00452448	36.8739
1-linoleoyl-GPG (18~2) levels	rs144019429	T	A	-0.253633	0.0461461	0.0289613	3.8781e-08	12	21136494	8115	exposure	TRUE	0.00361823	29.4613
1-linoleoyl-GPG (18~2) levels	rs4149021	A	G	0.3189	0.0584786	0.0174778	4.94491e-08	12	21141851	8115	exposure	TRUE	0.00349276	28.436
1-linoleoyl-GPI (18~2) levels	rs174547	C	T	0.165492	0.0158762	0.339608	1.92834e-25	11	61803311	8268	exposure	TRUE	0.0122847	102.808
1-linoleoyl-GPI (18~2) levels	rs11668882	T	C	-0.150151	0.0154422	0.563142	2.39566e-22	19	54171328	8268	exposure	TRUE	0.0110929	92.7224
1-linoleoyl-GPI (18~2) levels	rs4149067	G	C	0.148099	0.0190316	0.191957	7.15431e-15	12	21200977	8268	exposure	TRUE	0.00680413	56.6283
1-linoleoyl-GPI (18~2) levels	rs11045856	G	T	-0.105386	0.0174407	0.240041	1.51715e-09	12	21197755	8268	exposure	TRUE	0.00405202	33.6303
1-methyl-4-imidazoleacetate levels	rs10774021	T	C	0.359328	0.0151076	0.651121	4.82028e-125	12	240132	8090	exposure	TRUE	0.0586609	504.015
1-methyl-4-imidazoleacetate levels	rs4140962	T	A	0.28227	0.0148133	0.563014	5.95608e-81	12	366413	8090	exposure	TRUE	0.0392054	330.033
1-methyl-4-imidazoleacetate levels	rs7132236	A	G	-0.282001	0.0309197	0.0604579	7.48183e-20	12	230154	8090	exposure	TRUE	0.00903443	73.7366
1-methyl-4-imidazoleacetate levels	rs73046031	G	T	-0.165083	0.0184572	0.195234	3.75006e-19	12	464156	8090	exposure	TRUE	0.00856367	69.8612
1-methyl-4-imidazoleacetate levels	rs555044	A	C	0.15017	0.017559	0.256002	1.20638e-17	12	226756	8090	exposure	TRUE	0.00859036	70.0809
1-methyl-4-imidazoleacetate levels	rs520932	T	C	-0.137343	0.0173304	0.234453	2.28252e-15	12	258736	8090	exposure	TRUE	0.00677128	55.1395
1-methyl-4-imidazoleacetate levels	rs75835529	G	A	0.293183	0.0372584	0.040671	3.57788e-15	12	313614	8090	exposure	TRUE	0.00670749	54.6165
1-methyl-4-imidazoleacetate levels	rs147926609	T	C	-0.305389	0.0426527	0.0311348	8.07404e-13	12	360449	8090	exposure	TRUE	0.0056266	45.7655
1-methyl-4-imidazoleacetate levels	rs112485932	T	C	0.188257	0.0264508	0.0836907	1.10092e-12	12	301546	8090	exposure	TRUE	0.00543565	44.2038
1-methyl-4-imidazoleacetate levels	rs77462870	A	G	0.245845	0.0349103	0.0487492	1.89231e-12	12	494258	8090	exposure	TRUE	0.00560551	45.593
1-methyl-4-imidazoleacetate levels	rs7316368	C	T	0.104374	0.0169499	0.732838	7.3763e-10	12	508044	8090	exposure	TRUE	0.00426577	34.6493
1-methyl-4-imidazoleacetate levels	rs9783494	C	G	-0.209014	0.0352728	0.0460861	3.11068e-09	12	204213	8090	exposure	TRUE	0.00384114	31.1869
1-methyl-4-imidazoleacetate levels	rs61907057	C	G	-0.350592	0.0598232	0.0154971	4.61569e-09	12	383596	8090	exposure	TRUE	0.00375061	30.4491
1-methyl-4-imidazoleacetate levels	rs140378196	G	A	-0.314423	0.0544532	0.0186035	7.7322e-09	12	323034	8090	exposure	TRUE	0.00360992	29.3028
1-methyl-4-imidazoleacetate levels	rs4980822	A	G	0.0960851	0.0168054	0.741185	1.08086e-08	12	451851	8090	exposure	TRUE	0.00354208	28.7502
1-methyl-4-imidazoleacetate levels	rs9738806	T	A	-0.251583	0.0447946	0.0273888	1.95006e-08	12	516267	8090	exposure	TRUE	0.00337213	27.3661
1-methyl-5-imidazoleacetate levels	rs7094385	G	A	0.1259	0.0181764	0.216125	4.31221e-12	10	12091253	8171	exposure	TRUE	0.00537073	44.1104
1-methylhistidine levels	rs11133665	A	G	0.156172	0.0164769	0.291059	2.58604e-21	5	1188170	8226	exposure	TRUE	0.0100653	83.6188
1-methylhistidine levels	rs35285898	C	A	0.159332	0.0168676	0.262279	3.51879e-21	17	39399619	8226	exposure	TRUE	0.00982408	81.5948
1-methylhistidine levels	rs33933929	C	A	-0.155668	0.0169336	0.738299	3.8257e-20	17	39270188	8226	exposure	TRUE	0.00936411	77.7384
1-methylhistidine levels	rs7224067	G	A	-0.14744	0.0169942	0.737863	4.1026e-18	17	39505265	8226	exposure	TRUE	0.00840939	69.7454
1-methylhistidine levels	rs9915323	T	A	-0.133466	0.0164637	0.708472	5.20208e-16	17	39614228	8226	exposure	TRUE	0.00735825	60.9628
1-methylhistidine levels	rs4795393	T	C	-0.0906755	0.015291	0.618585	3.0298e-09	17	39737231	8226	exposure	TRUE	0.00387978	32.0316
1-methylhistidine levels	rs12517758	T	C	0.110401	0.0193739	0.812282	1.2091e-08	5	1165682	8226	exposure	TRUE	0.00371697	30.6824
1-methylhistidine levels	rs7732589	A	G	0.120657	0.0213111	0.141813	1.49888e-08	5	1213553	8226	exposure	TRUE	0.0035435	29.2454
1-methylhistidine levels	rs35042303	T	C	0.169952	0.0300921	0.0664537	1.62586e-08	20	52070514	8226	exposure	TRUE	0.00358375	29.5788
1-methylnicotinamide levels	rs3798167	T	G	-0.114258	0.0192162	0.202354	2.74904e-09	6	160146896	8194	exposure	TRUE	0.0042143	34.6696
1-methylxanthine levels	rs35570672	C	T	0.36773	0.0185198	0.777038	9.76899e-88	8	18415125	7959	exposure	TRUE	0.0468556	391.158
1-methylxanthine levels	rs2472297	T	C	0.148933	0.0180443	0.250094	1.53474e-16	15	74735539	7959	exposure	TRUE	0.00831997	66.7575
1-methylxanthine levels	rs4921893	C	A	-0.132572	0.016416	0.446046	6.70673e-16	8	18336709	7959	exposure	TRUE	0.00868534	69.7148
1-methylxanthine levels	rs73207808	T	C	-0.392903	0.0497959	0.0257297	3.01566e-15	8	18385655	7959	exposure	TRUE	0.00773954	62.0638
1-methylxanthine levels	rs10111245	A	C	-0.180725	0.0233722	0.128311	1.05469e-14	8	18360727	7959	exposure	TRUE	0.00730621	58.5634
1-methylxanthine levels	rs35107470	G	A	0.12765	0.0171631	0.314398	1.02667e-13	15	74525348	7959	exposure	TRUE	0.00702463	56.2904
1-methylxanthine levels	rs10448136	C	A	0.175586	0.0240275	0.876753	2.717e-13	8	18382184	7959	exposure	TRUE	0.0066629	53.3723
1-methylxanthine levels	rs34004794	T	G	0.129868	0.0196065	0.209409	3.50272e-11	15	74233244	7959	exposure	TRUE	0.00558446	44.6851
1-methylxanthine levels	rs9650592	A	G	0.158888	0.0245106	0.882114	9.02665e-11	8	18224320	7959	exposure	TRUE	0.00525048	41.9986
1-methylxanthine levels	rs2106727	G	A	0.10558	0.0164071	0.628515	1.23466e-10	7	17248374	7959	exposure	TRUE	0.00520535	41.6357
1-methylxanthine levels	rs113362184	C	T	0.101156	0.0158079	0.457835	1.56274e-10	15	75057658	7959	exposure	TRUE	0.00507988	40.627
1-methylxanthine levels	rs4585778	A	G	0.100894	0.016453	0.555346	8.66645e-10	8	18443215	7959	exposure	TRUE	0.00502744	40.2054
1-methylxanthine levels	rs6994374	A	C	0.102877	0.0168727	0.669729	1.07892e-09	8	18499224	7959	exposure	TRUE	0.00468205	37.4303
1-methylxanthine levels	rs73207880	A	G	0.115444	0.0202606	0.185957	1.21254e-08	8	18418088	7959	exposure	TRUE	0.0040349	32.2358
1-methylxanthine levels	rs73201998	G	A	-0.35532	0.0643073	0.0155283	3.28833e-08	8	18226260	7959	exposure	TRUE	0.00386008	30.8337
1-myristoyl-2-arachidonoyl-GPC (14~0_20~4) levels	rs102275	C	T	-0.342018	0.0152893	0.345143	7.74904e-111	11	61790331	8264	exposure	TRUE	0.0528778	461.267
1-myristoyl-2-arachidonoyl-GPC (14~0_20~4) levels	rs174465	T	C	0.215222	0.0161047	0.683501	9.82252e-41	11	61891328	8264	exposure	TRUE	0.0200408	168.963
1-myristoyl-2-arachidonoyl-GPC (14~0_20~4) levels	rs198460	A	G	0.122388	0.0148577	0.498486	1.76111e-16	11	61757502	8264	exposure	TRUE	0.00748934	62.3439
1-myristoyl-2-arachidonoyl-GPC (14~0_20~4) levels	rs174472	G	A	-0.110618	0.0152855	0.428374	4.59536e-13	11	61904484	8264	exposure	TRUE	0.00599262	49.8095
1-myristoyl-2-arachidonoyl-GPC (14~0_20~4) levels	rs916924	C	T	-0.246644	0.0344892	0.0494479	8.59444e-13	11	61851709	8264	exposure	TRUE	0.00571867	47.5194
1-myristoyl-2-arachidonoyl-GPC (14~0_20~4) levels	rs58542926	T	C	-0.202338	0.0284539	0.0756786	1.15136e-12	19	19268740	8264	exposure	TRUE	0.00572771	47.5949
1-myristoyl-2-arachidonoyl-GPC (14~0_20~4) levels	rs2736604	A	C	-0.2085	0.0293781	0.0688357	1.27401e-12	11	61932355	8264	exposure	TRUE	0.00557291	46.3014
1-myristoyl-2-arachidonoyl-GPC (14~0_20~4) levels	rs7118175	T	C	0.19551	0.0278016	0.921659	2.03129e-12	11	61871886	8264	exposure	TRUE	0.00551985	45.8581
1-myristoyl-2-arachidonoyl-GPC (14~0_20~4) levels	rs972354	T	C	-0.169175	0.0244031	0.101492	4.13409e-12	11	61950135	8264	exposure	TRUE	0.00521983	43.3525
1-myristoyl-2-arachidonoyl-GPC (14~0_20~4) levels	rs73002956	G	A	-0.186771	0.0274287	0.0823115	9.80628e-12	19	19467934	8264	exposure	TRUE	0.00526993	43.7708
1-myristoyl-2-arachidonoyl-GPC (14~0_20~4) levels	rs73004951	T	C	-0.183446	0.0278332	0.0793024	4.37172e-11	19	19584419	8264	exposure	TRUE	0.00491417	40.8013
1-myristoyl-2-arachidonoyl-GPC (14~0_20~4) levels	rs11230741	A	G	0.128015	0.0194679	0.193859	4.84228e-11	11	61583635	8264	exposure	TRUE	0.00512211	42.5367
1-myristoyl-2-arachidonoyl-GPC (14~0_20~4) levels	rs3758977	G	T	-0.0954977	0.0157259	0.344943	1.2584e-09	11	61969772	8264	exposure	TRUE	0.00412138	34.1917
1-myristoyl-2-arachidonoyl-GPC (14~0_20~4) levels	rs869112	G	A	0.141416	0.024959	0.100352	1.46236e-08	11	61649498	8264	exposure	TRUE	0.00361099	29.9421
1-myristoyl-2-arachidonoyl-GPC (14~0_20~4) levels	rs139957766	A	G	-0.267747	0.0473993	0.0254403	1.61617e-08	11	61839575	8264	exposure	TRUE	0.00355476	29.4742
1-myristoyl-2-arachidonoyl-GPC (14~0_20~4) levels	rs174569	C	T	-0.315193	0.0560441	0.0178896	1.86579e-08	11	61826692	8264	exposure	TRUE	0.00349095	28.9433
1-myristoyl-2-arachidonoyl-GPC (14~0_20~4) levels	rs740006	C	T	0.136827	0.0250967	0.0989025	4.98123e-08	11	61790396	8264	exposure	TRUE	0.00333697	27.6624
1-oleoyl-2-arachidonoyl-GPE (18~1_20~4) levels	rs1532085	G	A	-0.358021	0.0156177	0.62153	2.67276e-116	15	58391167	8121	exposure	TRUE	0.0603032	521.021
1-oleoyl-2-arachidonoyl-GPE (18~1_20~4) levels	rs1077834	C	T	0.37044	0.0185641	0.217497	1.36663e-88	15	58431280	8121	exposure	TRUE	0.0467095	397.816
1-oleoyl-2-arachidonoyl-GPE (18~1_20~4) levels	rs145347194	C	T	0.328139	0.02762	0.0876557	1.49493e-32	15	58377936	8121	exposure	TRUE	0.017222	142.276
1-oleoyl-2-arachidonoyl-GPE (18~1_20~4) levels	rs1318175	T	C	-0.2144	0.0209027	0.167581	1.10032e-24	15	58293930	8121	exposure	TRUE	0.0128247	105.476
1-oleoyl-2-arachidonoyl-GPE (18~1_20~4) levels	rs8042174	C	T	-0.245736	0.0250639	0.107802	1.07797e-22	15	58393771	8121	exposure	TRUE	0.011616	95.4185
1-oleoyl-2-arachidonoyl-GPE (18~1_20~4) levels	rs7930786	G	C	-0.233933	0.0302266	0.929383	9.99457e-15	11	116754011	8121	exposure	TRUE	0.00718318	58.7422
1-oleoyl-2-arachidonoyl-GPE (18~1_20~4) levels	rs174566	G	A	-0.123363	0.016301	0.344891	3.79437e-14	11	61824890	8121	exposure	TRUE	0.00687694	56.2205
1-oleoyl-2-arachidonoyl-GPE (18~1_20~4) levels	rs34663616	A	C	0.16104	0.022485	0.137132	7.94492e-13	15	58277131	8121	exposure	TRUE	0.00613735	50.1368
1-oleoyl-2-arachidonoyl-GPE (18~1_20~4) levels	rs62000865	A	G	0.209892	0.0320789	0.0645733	6.02923e-11	15	58406463	8121	exposure	TRUE	0.00532212	43.4415
1-oleoyl-2-arachidonoyl-GPE (18~1_20~4) levels	rs59007384	T	G	0.117492	0.019163	0.204106	8.72078e-10	19	44893408	8121	exposure	TRUE	0.00448495	36.5774
1-oleoyl-2-arachidonoyl-GPE (18~1_20~4) levels	rs12899879	C	T	0.156133	0.0256694	0.101204	1.18344e-09	15	58299216	8121	exposure	TRUE	0.00443484	36.1669
1-oleoyl-2-arachidonoyl-GPE (18~1_20~4) levels	rs11071374	G	T	-0.148634	0.024565	0.11713	1.44267e-09	15	58364248	8121	exposure	TRUE	0.00456911	37.2668
1-oleoyl-2-arachidonoyl-GPE (18~1_20~4) levels	rs79787170	G	A	0.283647	0.0473205	0.0281925	2.04542e-09	15	58462743	8121	exposure	TRUE	0.0044086	35.9519
1-oleoyl-2-arachidonoyl-GPE (18~1_20~4) levels	rs112694435	A	G	0.196128	0.0333165	0.0573841	3.93724e-09	15	58498451	8121	exposure	TRUE	0.00416136	33.9273
1-oleoyl-2-arachidonoyl-GPE (18~1_20~4) levels	rs35138338	T	C	-0.100964	0.0172678	0.27913	5.00659e-09	15	58452282	8121	exposure	TRUE	0.00410229	33.4437
1-oleoyl-2-arachidonoyl-GPE (18~1_20~4) levels	rs17821298	A	C	0.10261	0.0177854	0.255554	7.95827e-09	15	58398539	8121	exposure	TRUE	0.00400613	32.6566
1-oleoyl-2-arachidonoyl-GPE (18~1_20~4) levels	rs74018729	A	G	0.274084	0.0475376	0.0275683	8.13507e-09	15	58348941	8121	exposure	TRUE	0.00402779	32.8338
1-oleoyl-2-arachidonoyl-GPE (18~1_20~4) levels	rs6878680	C	G	0.0901934	0.0162766	0.637761	3.00251e-08	5	156960126	8121	exposure	TRUE	0.00375866	30.6317
1-oleoyl-2-arachidonoyl-GPE (18~1_20~4) levels	rs3826688	C	T	0.0885723	0.0161947	0.62305	4.51988e-08	19	44915704	8121	exposure	TRUE	0.00368496	30.0288
1-oleoyl-2-docosahexaenoyl-GPC (18~1_22~6) levels	rs66464172	C	T	-0.103813	0.0147669	0.451381	2.06378e-12	6	10978785	8267	exposure	TRUE	0.00533762	44.3522
1-oleoyl-2-docosahexaenoyl-GPC (18~1_22~6) levels	rs11871667	T	C	-0.0926168	0.0146081	0.526591	2.29594e-10	17	17574533	8267	exposure	TRUE	0.00427681	35.4996
1-oleoyl-2-docosahexaenoyl-GPC (18~1_22~6) levels	rs55914027	A	C	-0.095124	0.0150087	0.420084	2.329e-10	6	11088188	8267	exposure	TRUE	0.00440871	36.5993
1-oleoyl-2-docosahexaenoyl-GPC (18~1_22~6) levels	rs2304128	T	G	-0.165954	0.0276051	0.0785347	1.8357e-09	19	19635342	8267	exposure	TRUE	0.00398608	33.0768
1-oleoyl-2-docosahexaenoyl-GPC (18~1_22~6) levels	rs58542926	T	C	-0.166247	0.028146	0.0756511	3.49211e-09	19	19268740	8267	exposure	TRUE	0.00386535	32.0711
1-oleoyl-2-docosahexaenoyl-GPC (18~1_22~6) levels	rs499974	A	C	-0.117253	0.0198957	0.161499	3.78332e-09	11	75743976	8267	exposure	TRUE	0.0037235	30.8897
1-oleoyl-2-docosahexaenoyl-GPC (18~1_22~6) levels	rs964184	C	G	-0.119699	0.0218633	0.86875	4.37752e-08	11	116778201	8267	exposure	TRUE	0.00326742	27.0938
1-oleoyl-2-linoleoyl-GPE (18~1_18~2) levels	rs174546	T	C	0.396042	0.0157284	0.340693	6.62709e-140	11	61802358	8205	exposure	TRUE	0.0704634	621.827
1-oleoyl-2-linoleoyl-GPE (18~1_18~2) levels	rs261290	C	T	-0.245651	0.0164633	0.655421	2.40013e-50	15	58386521	8205	exposure	TRUE	0.0272569	229.853
1-oleoyl-2-linoleoyl-GPE (18~1_18~2) levels	rs2070895	A	G	0.253712	0.0187134	0.216459	7.12847e-42	15	58431740	8205	exposure	TRUE	0.0218348	183.109
1-oleoyl-2-linoleoyl-GPE (18~1_18~2) levels	rs198464	A	G	-0.155621	0.0153366	0.490748	3.41582e-24	11	61754149	8205	exposure	TRUE	0.0121048	100.512
1-oleoyl-2-linoleoyl-GPE (18~1_18~2) levels	rs174471	T	C	-0.14804	0.0155384	0.412828	1.61375e-21	11	61902565	8205	exposure	TRUE	0.0106248	88.0916
1-oleoyl-2-linoleoyl-GPE (18~1_18~2) levels	rs72739147	T	A	-0.189173	0.0226067	0.13498	5.86129e-17	15	58279202	8205	exposure	TRUE	0.00835687	69.1291
1-oleoyl-2-linoleoyl-GPE (18~1_18~2) levels	rs113003506	T	C	0.200011	0.0241426	0.113728	1.18546e-16	11	61861905	8205	exposure	TRUE	0.0080644	66.6901
1-oleoyl-2-linoleoyl-GPE (18~1_18~2) levels	rs174569	C	T	0.413346	0.0576267	0.0180186	7.34663e-13	11	61826692	8205	exposure	TRUE	0.00604619	49.8986
1-oleoyl-2-linoleoyl-GPE (18~1_18~2) levels	rs139957766	A	G	0.328646	0.0488791	0.0256158	1.7724e-11	11	61839575	8205	exposure	TRUE	0.00539169	44.4678
1-oleoyl-2-linoleoyl-GPE (18~1_18~2) levels	rs1692120	A	G	-0.103663	0.0154226	0.470771	1.79881e-11	11	61650000	8205	exposure	TRUE	0.00535465	44.1606
1-oleoyl-2-linoleoyl-GPE (18~1_18~2) levels	rs2727268	G	A	0.202511	0.0301932	0.0697348	1.98406e-11	11	61940173	8205	exposure	TRUE	0.00532088	43.8807
[truncated: 11,669 more rows]

## Sheet: Sheet5
Table S5 The associations between five metabolites and all health outcomes
[truncated: 227 more rows]
